# Supplementary material for: Clinical characteristics and prognosis of basaloid squamous cell carcinoma of the lung: a population-based analysis
Source: PeerJ. 2019 Apr 30;7:e6724. doi: 10.7717/peerj.6724 (PMC6499056; doi:10.7717/peerj.6724)
Supplement: Data S2 [file peerj-07-6724-s004.xlsx]

## Sheet: Sheet1
Race	Sex	Year of diagnosis	Grade	AJCC Stage	Derived AJCC T	AJCC N	AJCC M	Radiation	Chemotherapy	Survival months	OS	Lung - Surgery to Primary Site (1988-2015)	Age at diagnosis
White	Female	2004	Poorly differentiated; Grade III	IA	T1	N0	M0	None/Unknown	No/Unknown	30	Dead	Lobectomy/Bilobectomy	78
White	Female	2004	Moderately differentiated; Grade II	IB	T2	N0	M0	Beam radiation	Yes	10	Dead	No Surgery Of Primary Site	83
White	Male	2004	Poorly differentiated; Grade III	IA	T1	N0	M0	None/Unknown	No/Unknown	40	Dead	Lobectomy/Bilobectomy	60
White	Female	2004	Poorly differentiated; Grade III	IA	T1	N0	M0	None/Unknown	No/Unknown	59	Dead	Partial/Wedge/Segmental Resec., Lingulectomy, Partial Lobectomy, Sleeve Resec.	81
White	Male	2004	Moderately differentiated; Grade II	IIIA	T2	N2	M0	Beam radiation	Yes	61	Dead	No Surgery Of Primary Site	70
White	Male	2004	Moderately differentiated; Grade II	IA	T1	N0	M0	None/Unknown	No/Unknown	36	Dead	Partial/Wedge/Segmental Resec., Lingulectomy, Partial Lobectomy, Sleeve Resec.	73
Black	Male	2004	Poorly differentiated; Grade III	IB	T2	N0	M0	None/Unknown	Yes	50	Dead	Lobectomy/Bilobectomy	60
Black	Female	2004	Unknown	IIIB	T1	N3	M0	None/Unknown	Yes	5	Dead	No Surgery Of Primary Site	75
Other (American Indian/AK Native, Asian/Pacific Islander)	Male	2004	Moderately differentiated; Grade II	IA	T1	N0	M0	None/Unknown	No/Unknown	136	Alive	Partial/Wedge/Segmental Resec., Lingulectomy, Partial Lobectomy, Sleeve Resec.	69
White	Male	2004	Unknown	IV	T1	N3	M1	Beam radiation	No/Unknown	2	Dead	No Surgery Of Primary Site	71
White	Female	2004	Poorly differentiated; Grade III	IA	T1	N0	M0	None/Unknown	No/Unknown	37	Dead	Lobectomy/Bilobectomy	77
White	Male	2004	Moderately differentiated; Grade II	IA	T1	N0	M0	None/Unknown	No/Unknown	115	Dead	Lobectomy/Bilobectomy	75
Black	Female	2004	Unknown	IV	T4	N2	M1	Beam radiation	No/Unknown	1	Dead	No Surgery Of Primary Site	73
White	Male	2004	Moderately differentiated; Grade II	IA	T1	N0	M0	None/Unknown	No/Unknown	66	Dead	Lobectomy/Bilobectomy	62
White	Female	2004	Unknown	IB	T2	N0	M0	None/Unknown	No/Unknown	32	Dead	Partial/Wedge/Segmental Resec., Lingulectomy, Partial Lobectomy, Sleeve Resec.	40
White	Female	2004	Unknown	IA	T1	N0	M0	None/Unknown	No/Unknown	4	Dead	No Surgery Of Primary Site	83
White	Male	2004	Moderately differentiated; Grade II	IA	T1	N0	M0	None/Unknown	No/Unknown	25	Dead	Lobectomy/Bilobectomy	66
Other (American Indian/AK Native, Asian/Pacific Islander)	Male	2004	Poorly differentiated; Grade III	IV	T1	N0	M1	Beam radiation	No/Unknown	88	Dead	Partial/Wedge/Segmental Resec., Lingulectomy, Partial Lobectomy, Sleeve Resec.	57
White	Male	2004	Poorly differentiated; Grade III	IV	T4	N0	M1	None/Unknown	No/Unknown	0	Dead	No Surgery Of Primary Site	53
White	Male	2004	Moderately differentiated; Grade II	IA	T1	N0	M0	None/Unknown	No/Unknown	12	Dead	Lobectomy/Bilobectomy	67
White	Female	2004	Moderately differentiated; Grade II	IA	T1	N0	M0	None/Unknown	No/Unknown	137	Alive	Lobectomy/Bilobectomy	80
White	Female	2004	Moderately differentiated; Grade II	IA	T1	N0	M0	None/Unknown	No/Unknown	33	Dead	Lobectomy/Bilobectomy	66
White	Female	2004	Poorly differentiated; Grade III	IIIA	T1	N2	M0	Refused	No/Unknown	0	Dead	No Surgery Of Primary Site	75
White	Female	2004	Moderately differentiated; Grade II	IA	T1	N0	M0	None/Unknown	Yes	16	Dead	Lobectomy/Bilobectomy	65
White	Male	2004	Moderately differentiated; Grade II	IA	T1	N0	M0	None/Unknown	No/Unknown	82	Dead	Lobectomy/Bilobectomy	80
White	Male	2004	Poorly differentiated; Grade III	IB	T2	N0	M0	None/Unknown	No/Unknown	116	Dead	Partial/Wedge/Segmental Resec., Lingulectomy, Partial Lobectomy, Sleeve Resec.	62
White	Female	2004	Poorly differentiated; Grade III	IIIB	T4	N2	M0	Beam radiation	No/Unknown	9	Dead	No Surgery Of Primary Site	60
White	Female	2004	Unknown	IA	T1	N0	M0	Beam radiation	No/Unknown	13	Dead	No Surgery Of Primary Site	68
White	Female	2004	Poorly differentiated; Grade III	IA	T1	N0	M0	None/Unknown	No/Unknown	12	Dead	Lobectomy/Bilobectomy	73
White	Male	2004	Moderately differentiated; Grade II	IIA	T1	N1	M0	Refused	No/Unknown	114	Alive	Partial/Wedge/Segmental Resec., Lingulectomy, Partial Lobectomy, Sleeve Resec.	50
White	Female	2004	Moderately differentiated; Grade II	IIIA	T1	N2	M0	Beam radiation	No/Unknown	15	Dead	Partial/Wedge/Segmental Resec., Lingulectomy, Partial Lobectomy, Sleeve Resec.	77
Black	Male	2004	Poorly differentiated; Grade III	IIA	T1	N1	M0	Beam radiation	No/Unknown	13	Dead	Lobectomy/Bilobectomy	71
White	Female	2004	Poorly differentiated; Grade III	IA	T1	N0	M0	None/Unknown	No/Unknown	141	Alive	Lobectomy/Bilobectomy	78
White	Female	2004	Moderately differentiated; Grade II	IA	T1	N0	M0	None/Unknown	No/Unknown	46	Dead	Lobectomy/Bilobectomy	53
Black	Male	2004	Poorly differentiated; Grade III	IV	T1	N1	M1	Beam radiation	Yes	7	Dead	No Surgery Of Primary Site	80
White	Male	2004	Unknown	IIIB	T4	N2	M0	Beam radiation	No/Unknown	13	Dead	No Surgery Of Primary Site	68
Black	Female	2004	Moderately differentiated; Grade II	IA	T1	N0	M0	None/Unknown	No/Unknown	139	Alive	Partial/Wedge/Segmental Resec., Lingulectomy, Partial Lobectomy, Sleeve Resec.	67
White	Female	2004	Poorly differentiated; Grade III	IIB	T3	N0	M0	Beam radiation	No/Unknown	21	Dead	Partial/Wedge/Segmental Resec., Lingulectomy, Partial Lobectomy, Sleeve Resec.	81
White	Female	2004	Moderately differentiated; Grade II	IA	T1	N0	M0	None/Unknown	No/Unknown	141	Alive	Lobectomy/Bilobectomy	71
White	Female	2004	Moderately differentiated; Grade II	IA	T1	N0	M0	None/Unknown	No/Unknown	140	Alive	Lobectomy/Bilobectomy	65
Black	Male	2004	Unknown	IIIA	T3	N2	M0	Beam radiation	Yes	10	Dead	No Surgery Of Primary Site	56
White	Male	2004	Poorly differentiated; Grade III	IIIA	T2	N2	M0	Beam radiation	No/Unknown	6	Dead	No Surgery Of Primary Site	70
White	Male	2004	Moderately differentiated; Grade II	IV	T1	N2	M1	Beam radiation	Yes	14	Dead	Partial/Wedge/Segmental Resec., Lingulectomy, Partial Lobectomy, Sleeve Resec.	73
White	Male	2004	Unknown	IIIA	T1	N2	M0	Beam radiation	Yes	7	Dead	Lobectomy/Bilobectomy	76
White	Male	2004	Unknown	IIIB	T4	N1	M0	None/Unknown	No/Unknown	78	Dead	No Surgery Of Primary Site	59
White	Male	2004	Moderately differentiated; Grade II	IA	T1	N0	M0	None/Unknown	No/Unknown	20	Dead	Lobectomy/Bilobectomy	78
White	Male	2004	Unknown	IA	T1	N0	M0	None/Unknown	No/Unknown	27	Dead	Partial/Wedge/Segmental Resec., Lingulectomy, Partial Lobectomy, Sleeve Resec.	70
White	Female	2004	Poorly differentiated; Grade III	IB	T2	N0	M0	None/Unknown	No/Unknown	7	Dead	Partial/Wedge/Segmental Resec., Lingulectomy, Partial Lobectomy, Sleeve Resec.	81
White	Male	2004	Poorly differentiated; Grade III	IIA	T1	N1	M0	Beam radiation	Yes	7	Dead	No Surgery Of Primary Site	61
White	Male	2004	Unknown	IB	T2	N0	M0	None/Unknown	No/Unknown	18	Dead	No Surgery Of Primary Site	80
Black	Female	2004	Moderately differentiated; Grade II	IA	T1	N0	M0	None/Unknown	No/Unknown	26	Dead	Partial/Wedge/Segmental Resec., Lingulectomy, Partial Lobectomy, Sleeve Resec.	59
White	Male	2004	Unknown	IIA	T1	N1	M0	None/Unknown	No/Unknown	32	Dead	No Surgery Of Primary Site	81
White	Female	2004	Moderately differentiated; Grade II	IIIB	T4	N2	M0	None/Unknown	No/Unknown	2	Dead	No Surgery Of Primary Site	49
White	Male	2004	Moderately differentiated; Grade II	IA	T1	N0	M0	None/Unknown	No/Unknown	46	Dead	Lobectomy/Bilobectomy	58
White	Female	2004	Moderately differentiated; Grade II	IIIB	T2	N3	M0	Beam radiation	No/Unknown	14	Dead	No Surgery Of Primary Site	80
Other (American Indian/AK Native, Asian/Pacific Islander)	Female	2004	Moderately differentiated; Grade II	IIIB	T4	N2	M0	Beam radiation	Yes	87	Dead	No Surgery Of Primary Site	68
White	Male	2004	Poorly differentiated; Grade III	IV	T4	N3	M1	Beam radiation	No/Unknown	1	Dead	No Surgery Of Primary Site	54
White	Male	2004	Poorly differentiated; Grade III	IIIA	T2	N2	M0	Beam radiation	Yes	2	Dead	No Surgery Of Primary Site	82
White	Male	2004	Unknown	IIB	T3	N0	M0	Beam radiation	No/Unknown	10	Dead	No Surgery Of Primary Site	82
White	Male	2004	Unknown	IIB	T2	N1	M0	Beam radiation	Yes	63	Dead	No Surgery Of Primary Site	74
Black	Male	2004	Unknown	IIIA	T3	N2	M0	None/Unknown	No/Unknown	2	Dead	No Surgery Of Primary Site	77
Black	Male	2004	Unknown	IV	T4	N2	M1	None/Unknown	No/Unknown	1	Dead	No Surgery Of Primary Site	87
White	Male	2004	Unknown	IIIA	T2	N2	M0	Beam radiation	Yes	9	Dead	No Surgery Of Primary Site	77
White	Male	2004	Unknown	IIIB	T4	N2	M0	Beam radiation	No/Unknown	9	Dead	No Surgery Of Primary Site	80
White	Male	2004	Poorly differentiated; Grade III	IV	T4	N3	M1	Beam radiation	No/Unknown	6	Dead	No Surgery Of Primary Site	56
White	Female	2004	Moderately differentiated; Grade II	IIIB	T2	N3	M0	Beam radiation	Yes	41	Dead	No Surgery Of Primary Site	51
White	Female	2004	Unknown	IIIB	T4	N2	M0	Beam radiation	No/Unknown	2	Dead	No Surgery Of Primary Site	66
White	Male	2004	Moderately differentiated; Grade II	IB	T2	N0	M0	None/Unknown	No/Unknown	49	Dead	Radical Pneumonectomy (Complete Pneumonectomy Plus Dissection Of Mediastinal LN)	74
Black	Male	2004	Poorly differentiated; Grade III	IB	T2	N0	M0	None/Unknown	Yes	143	Alive	Radical Pneumonectomy (Complete Pneumonectomy Plus Dissection Of Mediastinal LN)	69
Black	Male	2004	Moderately differentiated; Grade II	IV	T4	N0	M1	Beam radiation	Yes	14	Dead	No Surgery Of Primary Site	63
White	Female	2004	Moderately differentiated; Grade II	IV	T3	N0	M1	Beam radiation	Yes	4	Dead	No Surgery Of Primary Site	85
Black	Male	2004	Poorly differentiated; Grade III	IIIB	T4	N3	M0	Beam radiation	No/Unknown	2	Dead	No Surgery Of Primary Site	54
White	Female	2004	Unknown	IIIB	T4	N0	M0	Beam radiation	No/Unknown	1	Dead	No Surgery Of Primary Site	85
White	Male	2004	Poorly differentiated; Grade III	IB	T2	N0	M0	None/Unknown	No/Unknown	28	Dead	Lobectomy/Bilobectomy	77
White	Male	2004	Moderately differentiated; Grade II	IV	T2	N0	M1	None/Unknown	No/Unknown	4	Dead	No Surgery Of Primary Site	78
Other (American Indian/AK Native, Asian/Pacific Islander)	Male	2004	Poorly differentiated; Grade III	IV	T4	N3	M1	None/Unknown	Yes	7	Dead	No Surgery Of Primary Site	50
White	Male	2004	Moderately differentiated; Grade II	IIIA	T3	N1	M0	None/Unknown	No/Unknown	0	Dead	No Surgery Of Primary Site	81
Black	Male	2004	Unknown	IV	T4	N0	M1	Beam radiation	Yes	9	Dead	No Surgery Of Primary Site	63
White	Male	2004	Unknown	IIIB	T4	N3	M0	Beam radiation	Yes	9	Dead	No Surgery Of Primary Site	66
White	Male	2004	Moderately differentiated; Grade II	IIIB	T4	N2	M0	None/Unknown	Yes	5	Dead	No Surgery Of Primary Site	88
White	Male	2004	Poorly differentiated; Grade III	IIIB	T4	N2	M0	None/Unknown	No/Unknown	0	Dead	No Surgery Of Primary Site	83
Black	Female	2004	Poorly differentiated; Grade III	IIIA	T2	N2	M0	Beam radiation	No/Unknown	8	Dead	No Surgery Of Primary Site	86
White	Female	2004	Poorly differentiated; Grade III	IIIB	T4	N2	M0	None/Unknown	Yes	3	Dead	No Surgery Of Primary Site	81
White	Male	2004	Unknown	IV	T4	N2	M1	Beam radiation	No/Unknown	2	Dead	No Surgery Of Primary Site	83
Other (American Indian/AK Native, Asian/Pacific Islander)	Male	2004	Unknown	IV	T2	N2	M1	Beam radiation	Yes	4	Dead	No Surgery Of Primary Site	81
White	Male	2004	Poorly differentiated; Grade III	IV	T2	N0	M1	None/Unknown	No/Unknown	0	Dead	No Surgery Of Primary Site	70
Other (American Indian/AK Native, Asian/Pacific Islander)	Male	2004	Poorly differentiated; Grade III	IB	T2	N0	M0	None/Unknown	No/Unknown	134	Dead	Complete/Total/Standard Pneumonectomy; Pneumonectomy, Nos	63
White	Male	2004	Moderately differentiated; Grade II	IIIB	T4	N2	M0	Beam radiation	Yes	46	Dead	No Surgery Of Primary Site	62
White	Female	2004	Unknown	IV	T4	N2	M1	None/Unknown	No/Unknown	0	Dead	No Surgery Of Primary Site	78
White	Male	2004	Moderately differentiated; Grade II	IV	T4	N2	M1	None/Unknown	No/Unknown	1	Dead	No Surgery Of Primary Site	84
White	Male	2004	Unknown	IB	T2	N0	M0	None/Unknown	No/Unknown	0	Dead	No Surgery Of Primary Site	82
White	Female	2004	Unknown	IIIB	T4	N0	M0	None/Unknown	No/Unknown	4	Dead	No Surgery Of Primary Site	77
White	Female	2004	Moderately differentiated; Grade II	IV	T4	N2	M1	None/Unknown	No/Unknown	2	Dead	No Surgery Of Primary Site	69
Black	Female	2004	Poorly differentiated; Grade III	IIIB	T4	N2	M0	Beam radiation	No/Unknown	12	Dead	No Surgery Of Primary Site	71
White	Male	2004	Poorly differentiated; Grade III	IB	T2	N0	M0	None/Unknown	Yes	28	Dead	Lobectomy/Bilobectomy	76
White	Female	2004	Poorly differentiated; Grade III	IIIB	T4	N0	M0	None/Unknown	No/Unknown	2	Dead	Lobectomy/Bilobectomy	81
White	Male	2004	Unknown	IV	T3	N2	M1	Beam radiation	No/Unknown	0	Dead	No Surgery Of Primary Site	62
White	Male	2004	Moderately differentiated; Grade II	IB	T2	N0	M0	None/Unknown	No/Unknown	35	Dead	Complete/Total/Standard Pneumonectomy; Pneumonectomy, Nos	69
White	Male	2004	Unknown	IV	T4	N2	M1	None/Unknown	Yes	3	Dead	No Surgery Of Primary Site	74
White	Male	2004	Moderately differentiated; Grade II	IIIB	T4	N1	M0	Beam radiation	Yes	37	Dead	No Surgery Of Primary Site	76
White	Male	2004	Poorly differentiated; Grade III	IIIB	T4	N0	M0	None/Unknown	No/Unknown	7	Dead	No Surgery Of Primary Site	53
White	Female	2004	Moderately differentiated; Grade II	IIIA	T3	N1	M0	None/Unknown	Yes	23	Dead	Complete/Total/Standard Pneumonectomy; Pneumonectomy, Nos	72
White	Female	2004	Unknown	IIB	T3	N0	M0	Beam radiation	Yes	25	Dead	No Surgery Of Primary Site	64
White	Female	2004	Unknown	IIIA	T2	N2	M0	Beam radiation	Yes	142	Alive	Lobectomy/Bilobectomy	62
White	Male	2004	Poorly differentiated; Grade III	IIB	T2	N1	M0	None/Unknown	No/Unknown	4	Dead	Lobectomy/Bilobectomy	65
White	Male	2004	Unknown	IV	T2	N2	M1	Beam radiation	No/Unknown	13	Dead	No Surgery Of Primary Site	73
White	Male	2004	Unknown	IIIA	T3	N1	M0	Beam radiation	Yes	5	Dead	No Surgery Of Primary Site	63
White	Male	2004	Unknown	IV	T3	N0	M1	Beam radiation	No/Unknown	2	Dead	No Surgery Of Primary Site	77
White	Male	2004	Moderately differentiated; Grade II	IIIA	T3	N1	M0	Refused	No/Unknown	1	Dead	No Surgery Of Primary Site	81
White	Male	2004	Poorly differentiated; Grade III	IIIB	T4	N2	M0	Beam radiation	No/Unknown	0	Dead	No Surgery Of Primary Site	72
White	Male	2004	Moderately differentiated; Grade II	IB	T2	N0	M0	None/Unknown	No/Unknown	3	Dead	Lobectomy/Bilobectomy	69
White	Female	2004	Poorly differentiated; Grade III	IIIA	T3	N1	M0	Beam radiation	No/Unknown	29	Dead	Lobectomy/Bilobectomy	76
Black	Female	2004	Unknown	IIIA	T2	N2	M0	None/Unknown	No/Unknown	0	Dead	No Surgery Of Primary Site	75
White	Male	2004	Poorly differentiated; Grade III	IV	T4	N2	M1	Beam radiation	No/Unknown	1	Dead	No Surgery Of Primary Site	69
White	Male	2004	Unknown	IIIA	T2	N2	M0	Beam radiation	Yes	3	Dead	No Surgery Of Primary Site	79
Black	Male	2004	Poorly differentiated; Grade III	IIIB	T4	N2	M0	Beam radiation	Yes	46	Dead	No Surgery Of Primary Site	71
White	Male	2004	Poorly differentiated; Grade III	IIIB	T4	N3	M0	None/Unknown	No/Unknown	1	Dead	No Surgery Of Primary Site	40
Black	Female	2004	Poorly differentiated; Grade III	IV	T4	N2	M1	Beam radiation	Yes	5	Dead	No Surgery Of Primary Site	59
White	Male	2004	Well differentiated; Grade I	IIIA	T3	N2	M0	Beam radiation	Yes	11	Dead	No Surgery Of Primary Site	53
Black	Male	2004	Unknown	IIB	T2	N1	M0	None/Unknown	No/Unknown	0	Dead	No Surgery Of Primary Site	65
White	Male	2004	Poorly differentiated; Grade III	IIB	T3	N0	M0	None/Unknown	No/Unknown	1	Dead	No Surgery Of Primary Site	69
White	Male	2004	Unknown	IIIA	T2	N2	M0	Beam radiation	Yes	7	Dead	Partial/Wedge/Segmental Resec., Lingulectomy, Partial Lobectomy, Sleeve Resec.	75
White	Female	2004	Poorly differentiated; Grade III	IV	T2	N0	M1	None/Unknown	No/Unknown	3	Dead	Lobectomy/Bilobectomy	71
White	Male	2004	Unknown	IIIB	T4	N2	M0	Beam radiation	Yes	9	Dead	No Surgery Of Primary Site	64
White	Female	2004	Unknown	IIIB	T4	N2	M0	Beam radiation	No/Unknown	6	Dead	No Surgery Of Primary Site	79
White	Male	2004	Unknown	IIB	T3	N0	M0	Beam radiation	Yes	65	Dead	Lobectomy/Bilobectomy	52
White	Male	2004	Poorly differentiated; Grade III	IIB	T2	N1	M0	None/Unknown	No/Unknown	76	Dead	Lobectomy/Bilobectomy	62
White	Male	2004	Moderately differentiated; Grade II	IIIB	T4	N0	M0	Beam radiation	Yes	12	Dead	Lobectomy/Bilobectomy	77
White	Male	2004	Poorly differentiated; Grade III	IV	T2	N1	M1	Beam radiation	Yes	5	Dead	No Surgery Of Primary Site	79
White	Male	2004	Unknown	IIIB	T4	N2	M0	Beam radiation	No/Unknown	4	Dead	No Surgery Of Primary Site	64
White	Male	2004	Well differentiated; Grade I	IIB	T2	N1	M0	None/Unknown	No/Unknown	4	Dead	Lobectomy/Bilobectomy	76
Black	Male	2004	Moderately differentiated; Grade II	IV	T4	N2	M1	None/Unknown	No/Unknown	0	Dead	No Surgery Of Primary Site	85
White	Male	2004	Unknown	IIIA	T2	N2	M0	Beam radiation	Yes	5	Dead	No Surgery Of Primary Site	65
White	Male	2004	Unknown	IV	T4	N0	M1	Beam radiation	No/Unknown	0	Dead	No Surgery Of Primary Site	75
White	Male	2004	Moderately differentiated; Grade II	IV	T2	N1	M1	None/Unknown	Yes	8	Dead	No Surgery Of Primary Site	79
Black	Male	2004	Well differentiated; Grade I	IIIA	T2	N2	M0	Beam radiation	Yes	18	Dead	No Surgery Of Primary Site	76
White	Male	2004	Poorly differentiated; Grade III	IIIA	T3	N2	M0	Beam radiation	Yes	17	Dead	Lobectomy/Bilobectomy	60
White	Female	2004	Poorly differentiated; Grade III	IV	T2	N2	M1	Beam radiation	No/Unknown	4	Dead	No Surgery Of Primary Site	79
White	Male	2004	Poorly differentiated; Grade III	IIB	T3	N0	M0	Beam radiation	No/Unknown	12	Dead	Lobectomy/Bilobectomy	51
Black	Female	2004	Moderately differentiated; Grade II	IV	T2	N1	M1	None/Unknown	No/Unknown	28	Dead	No Surgery Of Primary Site	63
White	Female	2004	Unknown	IV	T2	N2	M1	Beam radiation	Yes	7	Dead	No Surgery Of Primary Site	69
White	Male	2004	Moderately differentiated; Grade II	IV	T4	N2	M1	Beam radiation	Yes	7	Dead	Radical Pneumonectomy (Complete Pneumonectomy Plus Dissection Of Mediastinal LN)	62
Other (American Indian/AK Native, Asian/Pacific Islander)	Male	2004	Unknown	IIIB	T4	N2	M0	Beam radiation	Yes	21	Dead	No Surgery Of Primary Site	50
White	Male	2004	Poorly differentiated; Grade III	IIIB	T4	N0	M0	None/Unknown	Yes	5	Dead	No Surgery Of Primary Site	63
Black	Female	2004	Unknown	IV	T4	N3	M1	None/Unknown	No/Unknown	0	Dead	No Surgery Of Primary Site	86
White	Male	2004	Unknown	IV	T2	N3	M1	Beam radiation	Yes	10	Dead	No Surgery Of Primary Site	74
White	Female	2004	Moderately differentiated; Grade II	IV	T4	N2	M1	None/Unknown	No/Unknown	2	Dead	No Surgery Of Primary Site	89
Black	Male	2004	Unknown	IV	T2	N2	M1	None/Unknown	No/Unknown	0	Dead	No Surgery Of Primary Site	72
Black	Male	2004	Unknown	IIIB	T4	N2	M0	None/Unknown	Yes	5	Dead	No Surgery Of Primary Site	62
Black	Female	2004	Poorly differentiated; Grade III	IV	T4	N0	M1	Beam radiation	Yes	0	Dead	No Surgery Of Primary Site	78
White	Male	2004	Unknown	IV	T4	N1	M1	Beam radiation	Yes	3	Dead	No Surgery Of Primary Site	69
White	Male	2004	Poorly differentiated; Grade III	IV	T4	N2	M1	Beam radiation	Yes	2	Dead	No Surgery Of Primary Site	61
White	Male	2004	Poorly differentiated; Grade III	IIIA	T3	N1	M0	None/Unknown	No/Unknown	50	Dead	Lobectomy/Bilobectomy	56
White	Male	2004	Moderately differentiated; Grade II	IV	T4	N2	M1	Beam radiation	Yes	13	Dead	No Surgery Of Primary Site	64
White	Female	2004	Moderately differentiated; Grade II	IIIB	T4	N0	M0	None/Unknown	No/Unknown	3	Dead	Lobectomy/Bilobectomy	78
White	Male	2004	Poorly differentiated; Grade III	IIIB	T4	N0	M0	Beam radiation	Yes	7	Dead	Complete/Total/Standard Pneumonectomy; Pneumonectomy, Nos	68
White	Male	2004	Undifferentiated; anaplastic; Grade IV	IV	T4	N2	M1	None/Unknown	Yes	3	Dead	No Surgery Of Primary Site	75
White	Male	2004	Poorly differentiated; Grade III	IB	T2	N0	M0	None/Unknown	No/Unknown	2	Dead	No Surgery Of Primary Site	76
White	Male	2004	Poorly differentiated; Grade III	IB	T2	N0	M0	Beam radiation	Yes	7	Dead	No Surgery Of Primary Site	75
Black	Male	2004	Unknown	IIIB	T4	N2	M0	Beam radiation	Yes	64	Dead	No Surgery Of Primary Site	53
White	Male	2004	Moderately differentiated; Grade II	IIB	T3	N0	M0	Beam radiation	No/Unknown	4	Dead	No Surgery Of Primary Site	70
White	Female	2004	Moderately differentiated; Grade II	IV	T3	N2	M1	Beam radiation	Yes	2	Dead	No Surgery Of Primary Site	61
Black	Male	2004	Moderately differentiated; Grade II	IIIB	T4	N2	M0	Beam radiation	Yes	6	Dead	No Surgery Of Primary Site	66
White	Female	2004	Poorly differentiated; Grade III	IA	T1	N0	M0	None/Unknown	No/Unknown	19	Dead	Lobectomy/Bilobectomy	64
White	Female	2004	Moderately differentiated; Grade II	IIIB	T4	N2	M0	None/Unknown	No/Unknown	118	Dead	Lobectomy/Bilobectomy	63
White	Female	2004	Moderately differentiated; Grade II	IA	T1	N0	M0	None/Unknown	No/Unknown	103	Alive	Lobectomy/Bilobectomy	81
White	Male	2004	Poorly differentiated; Grade III	IA	T1	N0	M0	None/Unknown	No/Unknown	140	Alive	Lobectomy/Bilobectomy	52
White	Male	2004	Poorly differentiated; Grade III	IA	T1	N0	M0	None/Unknown	No/Unknown	21	Dead	Lobectomy/Bilobectomy	71
White	Female	2004	Moderately differentiated; Grade II	IA	T1	N0	M0	None/Unknown	No/Unknown	126	Dead	Partial/Wedge/Segmental Resec., Lingulectomy, Partial Lobectomy, Sleeve Resec.	66
White	Male	2004	Moderately differentiated; Grade II	IA	T1	N0	M0	None/Unknown	No/Unknown	90	Dead	Lobectomy/Bilobectomy	79
White	Female	2004	Poorly differentiated; Grade III	IB	T2	N0	M0	None/Unknown	No/Unknown	82	Dead	Lobectomy/Bilobectomy	52
White	Male	2004	Unknown	IIIA	T1	N2	M0	Beam radiation	No/Unknown	46	Dead	No Surgery Of Primary Site	90
White	Female	2004	Poorly differentiated; Grade III	IA	T1	N0	M0	None/Unknown	No/Unknown	131	Alive	Lobectomy/Bilobectomy	58
White	Male	2004	Moderately differentiated; Grade II	IA	T1	N0	M0	Beam radiation	No/Unknown	54	Dead	Partial/Wedge/Segmental Resec., Lingulectomy, Partial Lobectomy, Sleeve Resec.	66
White	Male	2004	Unknown	IV	T3	N0	M1	Beam radiation	Yes	18	Dead	No Surgery Of Primary Site	66
White	Male	2004	Poorly differentiated; Grade III	IIA	T1	N1	M0	Beam radiation	No/Unknown	30	Dead	Lobectomy/Bilobectomy	58
White	Female	2004	Unknown	IA	T1	N0	M0	None/Unknown	No/Unknown	0	Dead	No Surgery Of Primary Site	85
White	Male	2004	Unknown	IA	T1	N0	M0	None/Unknown	No/Unknown	27	Dead	Partial/Wedge/Segmental Resec., Lingulectomy, Partial Lobectomy, Sleeve Resec.	72
White	Male	2004	Moderately differentiated; Grade II	IA	T1	N0	M0	None/Unknown	No/Unknown	64	Dead	Partial/Wedge/Segmental Resec., Lingulectomy, Partial Lobectomy, Sleeve Resec.	66
Black	Male	2004	Poorly differentiated; Grade III	IIIB	T4	N0	M0	None/Unknown	No/Unknown	0	Dead	No Surgery Of Primary Site	67
White	Female	2004	Poorly differentiated; Grade III	IIA	T1	N1	M0	Beam radiation	Yes	141	Alive	Lobectomy/Bilobectomy	74
White	Female	2004	Unknown	IA	T1	N0	M0	Beam radiation	Yes	80	Dead	No Surgery Of Primary Site	67
Black	Male	2004	Poorly differentiated; Grade III	IV	T4	N2	M1	None/Unknown	No/Unknown	1	Dead	No Surgery Of Primary Site	59
White	Male	2004	Unknown	IIIA	T2	N2	M0	Beam radiation	Yes	20	Dead	No Surgery Of Primary Site	71
White	Female	2004	Unknown	IV	T2	N2	M1	None/Unknown	No/Unknown	1	Dead	No Surgery Of Primary Site	71
White	Male	2004	Poorly differentiated; Grade III	IB	T2	N0	M0	None/Unknown	No/Unknown	5	Dead	Lobectomy/Bilobectomy	60
Black	Male	2004	Poorly differentiated; Grade III	IIIA	T2	N2	M0	Beam radiation	Yes	19	Dead	Lobectomy/Bilobectomy	71
White	Male	2004	Poorly differentiated; Grade III	IV	T3	N2	M1	None/Unknown	No/Unknown	2	Dead	No Surgery Of Primary Site	52
White	Male	2004	Poorly differentiated; Grade III	IIIB	T4	N2	M0	Beam radiation	Yes	17	Dead	No Surgery Of Primary Site	65
White	Female	2004	Poorly differentiated; Grade III	IV	T4	N0	M1	Beam radiation	Yes	16	Dead	No Surgery Of Primary Site	77
White	Male	2004	Moderately differentiated; Grade II	IV	T4	N2	M1	None/Unknown	Yes	0	Dead	No Surgery Of Primary Site	74
White	Male	2004	Unknown	IV	T4	N0	M1	Beam radiation	Yes	1	Dead	No Surgery Of Primary Site	60
White	Male	2004	Poorly differentiated; Grade III	IIB	T3	N0	M0	None/Unknown	Yes	22	Dead	Extended Pneumonectomy	64
White	Male	2004	Poorly differentiated; Grade III	IIB	T2	N1	M0	None/Unknown	No/Unknown	11	Dead	Radical Pneumonectomy (Complete Pneumonectomy Plus Dissection Of Mediastinal LN)	60
White	Male	2004	Unknown	IV	T4	N2	M1	None/Unknown	No/Unknown	0	Dead	No Surgery Of Primary Site	76
Black	Male	2004	Moderately differentiated; Grade II	IIIB	T4	N2	M0	None/Unknown	Yes	5	Dead	No Surgery Of Primary Site	45
Other (American Indian/AK Native, Asian/Pacific Islander)	Male	2004	Poorly differentiated; Grade III	IV	T2	N2	M1	None/Unknown	No/Unknown	19	Dead	No Surgery Of Primary Site	75
Black	Male	2004	Moderately differentiated; Grade II	IV	T3	N1	M1	Beam radiation	No/Unknown	6	Dead	No Surgery Of Primary Site	58
White	Male	2004	Unknown	IV	T4	N2	M1	Beam radiation	Yes	10	Dead	No Surgery Of Primary Site	72
White	Male	2004	Moderately differentiated; Grade II	IIIB	T4	N1	M0	Beam radiation	No/Unknown	39	Dead	Lobectomy/Bilobectomy	76
White	Female	2004	Well differentiated; Grade I	IIIA	T2	N2	M0	None/Unknown	No/Unknown	13	Dead	No Surgery Of Primary Site	45
White	Male	2004	Unknown	IV	T4	N2	M1	None/Unknown	Yes	3	Dead	No Surgery Of Primary Site	67
White	Male	2004	Unknown	IIIB	T4	N2	M0	None/Unknown	No/Unknown	0	Dead	No Surgery Of Primary Site	57
White	Male	2004	Poorly differentiated; Grade III	IV	T4	N0	M1	None/Unknown	No/Unknown	0	Dead	No Surgery Of Primary Site	60
White	Female	2004	Poorly differentiated; Grade III	IB	T2	N0	M0	None/Unknown	Yes	17	Dead	Lobectomy/Bilobectomy	71
Black	Female	2004	Poorly differentiated; Grade III	IB	T2	N0	M0	Beam radiation	No/Unknown	9	Dead	No Surgery Of Primary Site	54
White	Male	2004	Poorly differentiated; Grade III	IV	T4	N2	M1	Beam radiation	Yes	6	Dead	No Surgery Of Primary Site	55
Black	Male	2004	Moderately differentiated; Grade II	IV	T4	N1	M1	Beam radiation	No/Unknown	0	Dead	No Surgery Of Primary Site	64
Black	Female	2004	Moderately differentiated; Grade II	IB	T2	N0	M0	None/Unknown	No/Unknown	5	Dead	No Surgery Of Primary Site	62
White	Male	2004	Unknown	IV	T4	N2	M1	Beam radiation	No/Unknown	2	Dead	No Surgery Of Primary Site	75
White	Male	2004	Unknown	IIIB	T3	N3	M0	Beam radiation	No/Unknown	3	Dead	No Surgery Of Primary Site	21
White	Male	2004	Moderately differentiated; Grade II	IIIB	T4	N0	M0	Beam radiation	Yes	11	Dead	No Surgery Of Primary Site	61
White	Male	2004	Poorly differentiated; Grade III	IV	T3	N2	M1	Beam radiation	Yes	10	Dead	No Surgery Of Primary Site	76
White	Male	2004	Unknown	IIIB	T4	N3	M0	None/Unknown	No/Unknown	0	Dead	No Surgery Of Primary Site	67
White	Male	2004	Poorly differentiated; Grade III	IV	T4	N2	M1	Beam radiation	Yes	2	Dead	No Surgery Of Primary Site	75
White	Male	2004	Poorly differentiated; Grade III	IV	T4	N2	M1	Beam radiation	Yes	5	Dead	No Surgery Of Primary Site	56
White	Male	2004	Undifferentiated; anaplastic; Grade IV	IIIA	T2	N2	M0	None/Unknown	Yes	15	Dead	Radical Pneumonectomy (Complete Pneumonectomy Plus Dissection Of Mediastinal LN)	60
White	Male	2004	Moderately differentiated; Grade II	IV	T4	N2	M1	Beam radiation	No/Unknown	2	Dead	No Surgery Of Primary Site	61
White	Male	2004	Unknown	IV	T4	N2	M1	Beam radiation	No/Unknown	14	Dead	No Surgery Of Primary Site	75
White	Male	2004	Moderately differentiated; Grade II	IIIA	T2	N2	M0	None/Unknown	No/Unknown	4	Dead	Complete/Total/Standard Pneumonectomy; Pneumonectomy, Nos	72
White	Male	2004	Unknown	IIIA	T2	N2	M0	None/Unknown	No/Unknown	Unknown	Dead	No Surgery Of Primary Site	78
White	Male	2004	Moderately differentiated; Grade II	IIIB	T4	N2	M0	Refused	No/Unknown	3	Dead	No Surgery Of Primary Site	76
Black	Male	2004	Poorly differentiated; Grade III	IA	T1	N0	M0	None/Unknown	No/Unknown	10	Dead	Partial/Wedge/Segmental Resec., Lingulectomy, Partial Lobectomy, Sleeve Resec.	68
White	Male	2004	Moderately differentiated; Grade II	IV	T2	N2	M1	Beam radiation	No/Unknown	35	Dead	No Surgery Of Primary Site	69
White	Female	2004	Unknown	IA	T1	N0	M0	Beam radiation	No/Unknown	13	Dead	Radical Pneumonectomy (Complete Pneumonectomy Plus Dissection Of Mediastinal LN)	71
White	Female	2004	Unknown	IA	T1	N0	M0	None/Unknown	No/Unknown	22	Dead	Partial/Wedge/Segmental Resec., Lingulectomy, Partial Lobectomy, Sleeve Resec.	62
White	Male	2004	Moderately differentiated; Grade II	IA	T1	N0	M0	Beam radiation	No/Unknown	25	Dead	No Surgery Of Primary Site	83
White	Female	2004	Moderately differentiated; Grade II	IA	T1	N0	M0	None/Unknown	No/Unknown	31	Dead	Partial/Wedge/Segmental Resec., Lingulectomy, Partial Lobectomy, Sleeve Resec.	81
White	Male	2004	Moderately differentiated; Grade II	IB	T2	N0	M0	None/Unknown	Yes	28	Dead	Partial/Wedge/Segmental Resec., Lingulectomy, Partial Lobectomy, Sleeve Resec.	62
White	Female	2004	Unknown	IV	T2	N2	M1	None/Unknown	No/Unknown	1	Dead	No Surgery Of Primary Site	81
Black	Female	2004	Well differentiated; Grade I	IA	T1	N0	M0	None/Unknown	No/Unknown	140	Alive	Lobectomy/Bilobectomy	63
White	Female	2004	Moderately differentiated; Grade II	IIIA	T1	N2	M0	None/Unknown	No/Unknown	2	Dead	Local Surgical Excision Or Destruction Of Lesion	78
White	Female	2004	Moderately differentiated; Grade II	IIIB	T4	N0	M0	None/Unknown	No/Unknown	62	Dead	Lobectomy/Bilobectomy	66
White	Female	2004	Poorly differentiated; Grade III	IA	T1	N0	M0	None/Unknown	No/Unknown	142	Alive	Complete/Total/Standard Pneumonectomy; Pneumonectomy, Nos	73
White	Female	2004	Poorly differentiated; Grade III	IA	T1	N0	M0	None/Unknown	No/Unknown	47	Dead	Lobectomy/Bilobectomy	85
Other (American Indian/AK Native, Asian/Pacific Islander)	Female	2004	Moderately differentiated; Grade II	IB	T2	N0	M0	None/Unknown	No/Unknown	53	Dead	Lobectomy/Bilobectomy	74
Black	Male	2004	Unknown	IV	T4	N1	M1	Beam radiation	Yes	4	Dead	No Surgery Of Primary Site	50
White	Male	2004	Poorly differentiated; Grade III	IA	T1	N0	M0	None/Unknown	No/Unknown	28	Dead	Partial/Wedge/Segmental Resec., Lingulectomy, Partial Lobectomy, Sleeve Resec.	74
White	Female	2004	Unknown	IV	T4	N3	M1	None/Unknown	Yes	22	Dead	No Surgery Of Primary Site	53
White	Female	2004	Moderately differentiated; Grade II	IA	T1	N0	M0	None/Unknown	No/Unknown	138	Alive	Lobectomy/Bilobectomy	79
White	Female	2004	Moderately differentiated; Grade II	IB	T2	N0	M0	None/Unknown	No/Unknown	139	Alive	Lobectomy/Bilobectomy	79
White	Male	2004	Poorly differentiated; Grade III	IIIA	T1	N2	M0	None/Unknown	Yes	23	Dead	Lobectomy/Bilobectomy	79
Black	Male	2004	Moderately differentiated; Grade II	IIIB	T4	N2	M0	Beam radiation	No/Unknown	17	Dead	No Surgery Of Primary Site	62
White	Male	2004	Poorly differentiated; Grade III	IA	T1	N0	M0	None/Unknown	No/Unknown	107	Dead	Lobectomy/Bilobectomy	67
White	Male	2004	Moderately differentiated; Grade II	IIIB	T4	N2	M0	Beam radiation	No/Unknown	8	Dead	No Surgery Of Primary Site	74
White	Female	2004	Poorly differentiated; Grade III	IB	T2	N0	M0	None/Unknown	No/Unknown	138	Alive	Lobectomy/Bilobectomy	57
White	Female	2004	Moderately differentiated; Grade II	IIIA	T2	N2	M0	None/Unknown	No/Unknown	7	Dead	Partial/Wedge/Segmental Resec., Lingulectomy, Partial Lobectomy, Sleeve Resec.	59
White	Female	2004	Moderately differentiated; Grade II	IA	T1	N0	M0	None/Unknown	No/Unknown	136	Alive	Lobectomy/Bilobectomy	62
White	Male	2004	Moderately differentiated; Grade II	IA	T1	N0	M0	None/Unknown	No/Unknown	0	Dead	Partial/Wedge/Segmental Resec., Lingulectomy, Partial Lobectomy, Sleeve Resec.	80
White	Female	2004	Unknown	IA	T1	N0	M0	Beam radiation	No/Unknown	78	Dead	No Surgery Of Primary Site	81
White	Male	2004	Moderately differentiated; Grade II	IIIA	T1	N2	M0	Beam radiation	Yes	7	Dead	No Surgery Of Primary Site	78
White	Male	2004	Moderately differentiated; Grade II	IB	T2	N0	M0	None/Unknown	No/Unknown	54	Dead	Complete/Total/Standard Pneumonectomy; Pneumonectomy, Nos	65
White	Female	2004	Moderately differentiated; Grade II	IA	T1	N0	M0	None/Unknown	No/Unknown	9	Dead	Lobectomy/Bilobectomy	76
White	Male	2004	Poorly differentiated; Grade III	IA	T1	N0	M0	None/Unknown	No/Unknown	19	Dead	Partial/Wedge/Segmental Resec., Lingulectomy, Partial Lobectomy, Sleeve Resec.	82
White	Male	2004	Well differentiated; Grade I	IIIB	T4	N0	M0	None/Unknown	No/Unknown	90	Dead	Lobectomy/Bilobectomy	68
White	Female	2004	Moderately differentiated; Grade II	IIA	T1	N1	M0	Beam radiation	Yes	10	Dead	No Surgery Of Primary Site	62
White	Male	2004	Moderately differentiated; Grade II	IA	T1	N0	M0	None/Unknown	No/Unknown	15	Dead	Partial/Wedge/Segmental Resec., Lingulectomy, Partial Lobectomy, Sleeve Resec.	65
White	Female	2004	Poorly differentiated; Grade III	IA	T1	N0	M0	None/Unknown	No/Unknown	128	Dead	Lobectomy/Bilobectomy	68
White	Male	2004	Poorly differentiated; Grade III	IV	T1	N0	M1	Beam radiation	No/Unknown	9	Dead	Partial/Wedge/Segmental Resec., Lingulectomy, Partial Lobectomy, Sleeve Resec.	61
White	Male	2004	Moderately differentiated; Grade II	IA	T1	N0	M0	None/Unknown	No/Unknown	137	Alive	Lobectomy/Bilobectomy	64
Black	Male	2004	Poorly differentiated; Grade III	IB	T2	N0	M0	None/Unknown	No/Unknown	3	Dead	Lobectomy/Bilobectomy	61
White	Male	2004	Moderately differentiated; Grade II	IIB	T3	N0	M0	Beam radiation	Yes	33	Dead	No Surgery Of Primary Site	64
Other (American Indian/AK Native, Asian/Pacific Islander)	Male	2004	Poorly differentiated; Grade III	IIIB	T4	N0	M0	Beam radiation	Yes	3	Dead	No Surgery Of Primary Site	78
White	Male	2004	Poorly differentiated; Grade III	IIIB	T4	N2	M0	Beam radiation	Yes	8	Dead	No Surgery Of Primary Site	72
White	Male	2004	Moderately differentiated; Grade II	IV	T4	N3	M1	Beam radiation	Yes	2	Dead	No Surgery Of Primary Site	59
White	Male	2004	Moderately differentiated; Grade II	IIIA	T3	N1	M0	None/Unknown	Yes	13	Dead	Lobectomy/Bilobectomy	57
White	Male	2004	Unknown	IB	T2	N0	M0	None/Unknown	Yes	10	Dead	No Surgery Of Primary Site	69
White	Male	2004	Poorly differentiated; Grade III	IIIB	T4	N2	M0	None/Unknown	No/Unknown	7	Dead	No Surgery Of Primary Site	80
White	Female	2004	Moderately differentiated; Grade II	IIIB	T4	N3	M0	Beam radiation	Yes	4	Dead	No Surgery Of Primary Site	60
White	Male	2004	Poorly differentiated; Grade III	IIIB	T4	N0	M0	None/Unknown	No/Unknown	35	Dead	Lobectomy/Bilobectomy	61
White	Male	2004	Poorly differentiated; Grade III	IIIB	T4	N2	M0	Beam radiation	Yes	30	Dead	No Surgery Of Primary Site	78
White	Male	2004	Unknown	IIIB	T4	N2	M0	Beam radiation	Yes	16	Dead	No Surgery Of Primary Site	46
White	Male	2004	Poorly differentiated; Grade III	IV	T4	N2	M1	None/Unknown	No/Unknown	5	Dead	No Surgery Of Primary Site	57
White	Male	2004	Moderately differentiated; Grade II	IIB	T2	N1	M0	None/Unknown	No/Unknown	3	Dead	Lobectomy/Bilobectomy	79
Black	Male	2004	Poorly differentiated; Grade III	IIB	T3	N0	M0	Beam radiation	Yes	30	Dead	Lobectomy/Bilobectomy	66
White	Male	2004	Unknown	IV	T4	N3	M1	Beam radiation	Yes	4	Dead	No Surgery Of Primary Site	73
White	Male	2004	Unknown	IIIA	T2	N2	M0	None/Unknown	Yes	3	Dead	No Surgery Of Primary Site	67
White	Male	2004	Unknown	IV	T3	N2	M1	None/Unknown	No/Unknown	1	Dead	No Surgery Of Primary Site	65
White	Male	2004	Unknown	IIB	T2	N1	M0	Beam radiation	No/Unknown	5	Dead	No Surgery Of Primary Site	64
White	Female	2004	Unknown	IV	T4	N0	M1	Beam radiation	No/Unknown	5	Dead	No Surgery Of Primary Site	57
White	Male	2004	Unknown	IIIA	T1	N2	M0	Beam radiation	Yes	4	Dead	No Surgery Of Primary Site	82
White	Female	2004	Moderately differentiated; Grade II	IA	T1	N0	M0	None/Unknown	No/Unknown	94	Dead	Lobectomy/Bilobectomy	78
White	Male	2004	Poorly differentiated; Grade III	IB	T2	N0	M0	None/Unknown	No/Unknown	91	Dead	Lobectomy/Bilobectomy	72
White	Female	2004	Poorly differentiated; Grade III	IV	T4	N2	M1	None/Unknown	No/Unknown	4	Dead	No Surgery Of Primary Site	78
White	Male	2004	Moderately differentiated; Grade II	IA	T1	N0	M0	None/Unknown	No/Unknown	16	Dead	Lobectomy/Bilobectomy	69
White	Female	2004	Poorly differentiated; Grade III	IV	T2	N1	M1	None/Unknown	No/Unknown	3	Dead	No Surgery Of Primary Site	76
White	Male	2004	Moderately differentiated; Grade II	IA	T1	N0	M0	None/Unknown	No/Unknown	42	Dead	Partial/Wedge/Segmental Resec., Lingulectomy, Partial Lobectomy, Sleeve Resec.	80
White	Male	2004	Moderately differentiated; Grade II	IA	T1	N0	M0	None/Unknown	No/Unknown	91	Dead	Lobectomy/Bilobectomy	60
White	Female	2004	Moderately differentiated; Grade II	IIB	T3	N0	M0	Beam radiation	No/Unknown	37	Dead	Lobectomy/Bilobectomy	73
White	Female	2004	Moderately differentiated; Grade II	IA	T1	N0	M0	None/Unknown	No/Unknown	6	Dead	Partial/Wedge/Segmental Resec., Lingulectomy, Partial Lobectomy, Sleeve Resec.	76
White	Female	2004	Poorly differentiated; Grade III	IIIA	T1	N2	M0	Beam radiation	No/Unknown	4	Dead	No Surgery Of Primary Site	53
White	Male	2004	Unknown	IIIA	T1	N2	M0	Beam radiation	No/Unknown	11	Dead	Local Surgical Excision Or Destruction Of Lesion	72
White	Male	2004	Unknown	IA	T1	N0	M0	None/Unknown	No/Unknown	10	Dead	No Surgery Of Primary Site	59
White	Male	2004	Unknown	IA	T1	N0	M0	None/Unknown	No/Unknown	2	Dead	Lobectomy/Bilobectomy	68
White	Female	2004	Moderately differentiated; Grade II	IIIB	T4	N0	M0	Beam radiation	Yes	8	Dead	No Surgery Of Primary Site	60
White	Female	2004	Moderately differentiated; Grade II	IA	T1	N0	M0	None/Unknown	No/Unknown	86	Dead	Lobectomy/Bilobectomy	55
White	Male	2004	Moderately differentiated; Grade II	IA	T1	N0	M0	None/Unknown	No/Unknown	92	Dead	Lobectomy/Bilobectomy	74
White	Male	2004	Poorly differentiated; Grade III	IA	T1	N0	M0	None/Unknown	No/Unknown	138	Alive	Lobectomy/Bilobectomy	67
White	Male	2004	Unknown	IV	T4	N2	M1	None/Unknown	No/Unknown	22	Dead	No Surgery Of Primary Site	72
White	Male	2004	Poorly differentiated; Grade III	IV	T4	N2	M1	Beam radiation	No/Unknown	13	Dead	No Surgery Of Primary Site	77
White	Male	2004	Poorly differentiated; Grade III	IA	T1	N0	M0	None/Unknown	No/Unknown	109	Dead	Partial/Wedge/Segmental Resec., Lingulectomy, Partial Lobectomy, Sleeve Resec.	67
White	Male	2004	Unknown	IIIB	T4	N0	M0	Beam radiation	Yes	1	Dead	No Surgery Of Primary Site	58
Black	Male	2004	Poorly differentiated; Grade III	IA	T1	N0	M0	Beam radiation	No/Unknown	108	Dead	Partial/Wedge/Segmental Resec., Lingulectomy, Partial Lobectomy, Sleeve Resec.	63
White	Female	2004	Moderately differentiated; Grade II	IB	T2	N0	M0	None/Unknown	Yes	136	Alive	Lobectomy/Bilobectomy	59
Black	Male	2004	Unknown	IV	T4	N3	M1	None/Unknown	Yes	32	Dead	No Surgery Of Primary Site	73
White	Female	2004	Poorly differentiated; Grade III	IA	T1	N0	M0	None/Unknown	No/Unknown	27	Dead	Lobectomy/Bilobectomy	64
White	Female	2004	Poorly differentiated; Grade III	IIIB	T4	N2	M0	Beam radiation	Yes	65	Dead	No Surgery Of Primary Site	74
Other (American Indian/AK Native, Asian/Pacific Islander)	Female	2004	Unknown	IIIB	T4	N1	M0	None/Unknown	No/Unknown	0	Dead	No Surgery Of Primary Site	81
Other (American Indian/AK Native, Asian/Pacific Islander)	Female	2004	Poorly differentiated; Grade III	IV	T3	N2	M1	Beam radiation	Yes	4	Dead	No Surgery Of Primary Site	77
White	Male	2004	Poorly differentiated; Grade III	IV	T2	N2	M1	Beam radiation	Yes	5	Dead	No Surgery Of Primary Site	75
Black	Male	2004	Moderately differentiated; Grade II	IV	T4	N2	M1	Beam radiation	Yes	6	Dead	No Surgery Of Primary Site	62
White	Male	2004	Unknown	IIIB	T4	N2	M0	Beam radiation	No/Unknown	24	Dead	Partial/Wedge/Segmental Resec., Lingulectomy, Partial Lobectomy, Sleeve Resec.	55
White	Male	2004	Moderately differentiated; Grade II	IV	T2	N0	M1	Beam radiation	No/Unknown	1	Dead	No Surgery Of Primary Site	70
White	Female	2004	Poorly differentiated; Grade III	IIB	T2	N1	M0	None/Unknown	No/Unknown	9	Dead	No Surgery Of Primary Site	65
White	Male	2004	Poorly differentiated; Grade III	IV	T4	N2	M1	Beam radiation	No/Unknown	5	Dead	No Surgery Of Primary Site	56
White	Male	2004	Poorly differentiated; Grade III	IA	T1	N0	M0	None/Unknown	No/Unknown	100	Dead	Partial/Wedge/Segmental Resec., Lingulectomy, Partial Lobectomy, Sleeve Resec.	61
White	Male	2004	Poorly differentiated; Grade III	IA	T1	N0	M0	None/Unknown	No/Unknown	21	Dead	Lobectomy/Bilobectomy	72
White	Male	2004	Poorly differentiated; Grade III	IA	T1	N0	M0	None/Unknown	No/Unknown	9	Dead	Lobectomy/Bilobectomy	70
Black	Female	2004	Unknown	IA	T1	N0	M0	None/Unknown	No/Unknown	137	Alive	Partial/Wedge/Segmental Resec., Lingulectomy, Partial Lobectomy, Sleeve Resec.	52
White	Male	2004	Moderately differentiated; Grade II	IA	T1	N0	M0	None/Unknown	No/Unknown	102	Dead	Partial/Wedge/Segmental Resec., Lingulectomy, Partial Lobectomy, Sleeve Resec.	73
White	Female	2004	Moderately differentiated; Grade II	IB	T2	N0	M0	None/Unknown	No/Unknown	133	Alive	Lobectomy/Bilobectomy	63
Other (American Indian/AK Native, Asian/Pacific Islander)	Male	2004	Moderately differentiated; Grade II	IA	T1	N0	M0	None/Unknown	No/Unknown	61	Dead	Lobectomy/Bilobectomy	68
White	Female	2004	Moderately differentiated; Grade II	IA	T1	N0	M0	None/Unknown	No/Unknown	138	Alive	Lobectomy/Bilobectomy	72
White	Male	2004	Moderately differentiated; Grade II	IIIB	T4	N0	M0	None/Unknown	No/Unknown	11	Dead	No Surgery Of Primary Site	79
White	Male	2004	Poorly differentiated; Grade III	IA	T1	N0	M0	None/Unknown	No/Unknown	86	Dead	Partial/Wedge/Segmental Resec., Lingulectomy, Partial Lobectomy, Sleeve Resec.	65
White	Female	2004	Poorly differentiated; Grade III	IA	T1	N0	M0	None/Unknown	No/Unknown	92	Dead	Lobectomy/Bilobectomy	72
Other (American Indian/AK Native, Asian/Pacific Islander)	Female	2004	Poorly differentiated; Grade III	IIA	T1	N1	M0	Beam radiation	Yes	135	Alive	Lobectomy/Bilobectomy	62
White	Female	2004	Poorly differentiated; Grade III	IA	T1	N0	M0	None/Unknown	No/Unknown	115	Dead	Partial/Wedge/Segmental Resec., Lingulectomy, Partial Lobectomy, Sleeve Resec.	76
White	Male	2004	Moderately differentiated; Grade II	IV	T2	N0	M1	None/Unknown	No/Unknown	14	Dead	Partial/Wedge/Segmental Resec., Lingulectomy, Partial Lobectomy, Sleeve Resec.	65
Other (American Indian/AK Native, Asian/Pacific Islander)	Male	2004	Unknown	IA	T1	N0	M0	None/Unknown	No/Unknown	86	Dead	Lobectomy/Bilobectomy	73
White	Female	2004	Poorly differentiated; Grade III	IIIA	T1	N2	M0	Beam radiation	No/Unknown	52	Dead	No Surgery Of Primary Site	55
White	Female	2004	Poorly differentiated; Grade III	IA	T1	N0	M0	None/Unknown	No/Unknown	101	Dead	Lobectomy/Bilobectomy	72
White	Female	2004	Moderately differentiated; Grade II	IIIB	T4	N0	M0	None/Unknown	No/Unknown	54	Dead	Partial/Wedge/Segmental Resec., Lingulectomy, Partial Lobectomy, Sleeve Resec.	77
White	Male	2004	Moderately differentiated; Grade II	IA	T1	N0	M0	None/Unknown	No/Unknown	21	Dead	Lobectomy/Bilobectomy	66
White	Female	2004	Moderately differentiated; Grade II	IA	T1	N0	M0	None/Unknown	No/Unknown	50	Dead	Partial/Wedge/Segmental Resec., Lingulectomy, Partial Lobectomy, Sleeve Resec.	68
White	Female	2004	Unknown	IIIB	T4	N2	M0	None/Unknown	No/Unknown	2	Dead	No Surgery Of Primary Site	66
White	Male	2004	Unknown	IA	T1	N0	M0	None/Unknown	No/Unknown	67	Dead	Partial/Wedge/Segmental Resec., Lingulectomy, Partial Lobectomy, Sleeve Resec.	81
White	Female	2004	Poorly differentiated; Grade III	IA	T1	N0	M0	None/Unknown	No/Unknown	98	Dead	Lobectomy/Bilobectomy	66
White	Female	2004	Poorly differentiated; Grade III	IA	T1	N0	M0	Beam radiation	No/Unknown	14	Dead	No Surgery Of Primary Site	66
White	Male	2004	Unknown	IA	T1	N0	M0	Beam radiation	Yes	57	Dead	No Surgery Of Primary Site	83
White	Female	2004	Unknown	IIIB	T4	N0	M0	None/Unknown	No/Unknown	132	Dead	No Surgery Of Primary Site	56
White	Female	2004	Moderately differentiated; Grade II	IIA	T1	N1	M0	None/Unknown	No/Unknown	141	Alive	Radical Pneumonectomy (Complete Pneumonectomy Plus Dissection Of Mediastinal LN)	70
Black	Male	2004	Moderately differentiated; Grade II	IA	T1	N0	M0	None/Unknown	No/Unknown	93	Dead	Partial/Wedge/Segmental Resec., Lingulectomy, Partial Lobectomy, Sleeve Resec.	83
White	Female	2004	Moderately differentiated; Grade II	IA	T1	N0	M0	None/Unknown	No/Unknown	3	Dead	Partial/Wedge/Segmental Resec., Lingulectomy, Partial Lobectomy, Sleeve Resec.	79
White	Female	2004	Poorly differentiated; Grade III	IA	T1	N0	M0	None/Unknown	No/Unknown	143	Alive	Lobectomy/Bilobectomy	71
White	Male	2004	Moderately differentiated; Grade II	IIA	T1	N1	M0	None/Unknown	No/Unknown	74	Dead	Lobectomy/Bilobectomy	61
White	Male	2004	Unknown	IV	T1	N2	M1	None/Unknown	No/Unknown	0	Dead	No Surgery Of Primary Site	70
White	Female	2004	Moderately differentiated; Grade II	IIA	T1	N1	M0	Beam radiation	No/Unknown	107	Dead	No Surgery Of Primary Site	73
White	Female	2004	Well differentiated; Grade I	IA	T1	N0	M0	None/Unknown	No/Unknown	125	Dead	Lobectomy/Bilobectomy	73
White	Male	2004	Moderately differentiated; Grade II	IA	T1	N0	M0	None/Unknown	Yes	3	Dead	Lobectomy/Bilobectomy	52
White	Female	2004	Moderately differentiated; Grade II	IIB	T2	N1	M0	None/Unknown	Yes	42	Dead	Lobectomy/Bilobectomy	57
White	Female	2004	Unknown	IA	T1	N0	M0	None/Unknown	No/Unknown	12	Dead	No Surgery Of Primary Site	60
White	Male	2004	Moderately differentiated; Grade II	IA	T1	N0	M0	None/Unknown	No/Unknown	93	Dead	Partial/Wedge/Segmental Resec., Lingulectomy, Partial Lobectomy, Sleeve Resec.	81
Other (American Indian/AK Native, Asian/Pacific Islander)	Male	2004	Poorly differentiated; Grade III	IIIA	T1	N2	M0	None/Unknown	No/Unknown	29	Dead	Lobectomy/Bilobectomy	76
Other (American Indian/AK Native, Asian/Pacific Islander)	Male	2004	Moderately differentiated; Grade II	IA	T1	N0	M0	None/Unknown	No/Unknown	132	Alive	Local Surgical Excision Or Destruction Of Lesion	79
Black	Female	2004	Poorly differentiated; Grade III	IA	T1	N0	M0	None/Unknown	No/Unknown	0	Dead	No Surgery Of Primary Site	79
White	Female	2004	Poorly differentiated; Grade III	IA	T1	N0	M0	None/Unknown	No/Unknown	43	Dead	Lobectomy/Bilobectomy	64
White	Male	2004	Moderately differentiated; Grade II	IV	T2	N0	M1	Beam radiation	No/Unknown	1	Dead	Lobectomy/Bilobectomy	80
White	Female	2004	Poorly differentiated; Grade III	IA	T1	N0	M0	None/Unknown	No/Unknown	88	Dead	Partial/Wedge/Segmental Resec., Lingulectomy, Partial Lobectomy, Sleeve Resec.	84
White	Female	2004	Poorly differentiated; Grade III	IIIB	T4	N2	M0	Beam radiation	Yes	48	Dead	No Surgery Of Primary Site	47
White	Female	2004	Poorly differentiated; Grade III	IA	T1	N0	M0	None/Unknown	No/Unknown	53	Dead	Partial/Wedge/Segmental Resec., Lingulectomy, Partial Lobectomy, Sleeve Resec.	76
White	Male	2004	Poorly differentiated; Grade III	IA	T1	N0	M0	None/Unknown	No/Unknown	60	Dead	Lobectomy/Bilobectomy	77
White	Female	2004	Moderately differentiated; Grade II	IA	T1	N0	M0	None/Unknown	No/Unknown	53	Dead	Lobectomy/Bilobectomy	81
White	Male	2004	Well differentiated; Grade I	IA	T1	N0	M0	None/Unknown	No/Unknown	83	Dead	Partial/Wedge/Segmental Resec., Lingulectomy, Partial Lobectomy, Sleeve Resec.	89
White	Male	2004	Moderately differentiated; Grade II	IB	T2	N0	M0	None/Unknown	Yes	141	Alive	Lobectomy/Bilobectomy	58
White	Female	2004	Moderately differentiated; Grade II	IV	T1	N1	M1	None/Unknown	No/Unknown	73	Dead	Lobectomy/Bilobectomy	74
White	Male	2004	Moderately differentiated; Grade II	IB	T2	N0	M0	None/Unknown	No/Unknown	133	Alive	Lobectomy/Bilobectomy	66
White	Female	2004	Moderately differentiated; Grade II	IIB	T3	N0	M0	Beam radiation	No/Unknown	141	Alive	Lobectomy/Bilobectomy	60
White	Male	2004	Moderately differentiated; Grade II	IA	T1	N0	M0	None/Unknown	No/Unknown	31	Dead	Lobectomy/Bilobectomy	57
White	Male	2004	Poorly differentiated; Grade III	IA	T1	N0	M0	None/Unknown	No/Unknown	44	Dead	Partial/Wedge/Segmental Resec., Lingulectomy, Partial Lobectomy, Sleeve Resec.	70
White	Male	2004	Moderately differentiated; Grade II	IIB	T3	N0	M0	None/Unknown	No/Unknown	9	Dead	Lobectomy/Bilobectomy	80
White	Female	2004	Unknown	IV	T1	N0	M1	Beam radiation	No/Unknown	9	Dead	No Surgery Of Primary Site	68
White	Female	2004	Unknown	IV	T2	N0	M1	Beam radiation	No/Unknown	2	Dead	No Surgery Of Primary Site	66
White	Male	2004	Poorly differentiated; Grade III	IV	T4	N2	M1	None/Unknown	No/Unknown	2	Dead	No Surgery Of Primary Site	53
White	Female	2004	Moderately differentiated; Grade II	IA	T1	N0	M0	Beam radiation	No/Unknown	17	Dead	No Surgery Of Primary Site	81
White	Female	2004	Poorly differentiated; Grade III	IV	T4	N2	M1	None/Unknown	Yes	1	Dead	No Surgery Of Primary Site	47
White	Female	2004	Moderately differentiated; Grade II	IA	T1	N0	M0	None/Unknown	No/Unknown	24	Dead	Partial/Wedge/Segmental Resec., Lingulectomy, Partial Lobectomy, Sleeve Resec.	76
Other (American Indian/AK Native, Asian/Pacific Islander)	Male	2004	Unknown	IA	T1	N0	M0	None/Unknown	No/Unknown	39	Dead	Lobectomy/Bilobectomy	55
White	Male	2004	Poorly differentiated; Grade III	IA	T1	N0	M0	None/Unknown	No/Unknown	16	Dead	Partial/Wedge/Segmental Resec., Lingulectomy, Partial Lobectomy, Sleeve Resec.	73
White	Male	2004	Poorly differentiated; Grade III	IA	T1	N0	M0	None/Unknown	No/Unknown	115	Dead	Lobectomy/Bilobectomy	63
Other (American Indian/AK Native, Asian/Pacific Islander)	Female	2004	Unknown	IV	T1	N0	M1	None/Unknown	No/Unknown	2	Dead	No Surgery Of Primary Site	66
White	Female	2004	Well differentiated; Grade I	IB	T2	N0	M0	None/Unknown	No/Unknown	65	Dead	Partial/Wedge/Segmental Resec., Lingulectomy, Partial Lobectomy, Sleeve Resec.	74
White	Female	2004	Moderately differentiated; Grade II	IA	T1	N0	M0	None/Unknown	No/Unknown	137	Alive	Partial/Wedge/Segmental Resec., Lingulectomy, Partial Lobectomy, Sleeve Resec.	58
White	Male	2004	Moderately differentiated; Grade II	IA	T1	N0	M0	None/Unknown	No/Unknown	21	Dead	Lobectomy/Bilobectomy	79
Black	Male	2004	Moderately differentiated; Grade II	IIB	T2	N1	M0	None/Unknown	Yes	140	Alive	Lobectomy/Bilobectomy	47
White	Male	2004	Moderately differentiated; Grade II	IA	T1	N0	M0	None/Unknown	No/Unknown	134	Alive	Lobectomy/Bilobectomy	67
White	Female	2004	Moderately differentiated; Grade II	IA	T1	N0	M0	None/Unknown	No/Unknown	133	Alive	Lobectomy/Bilobectomy	76
White	Female	2004	Unknown	IIIB	T1	N3	M0	Beam radiation	Yes	11	Dead	No Surgery Of Primary Site	63
White	Male	2004	Moderately differentiated; Grade II	IV	T1	N0	M1	None/Unknown	No/Unknown	135	Alive	Complete/Total/Standard Pneumonectomy; Pneumonectomy, Nos	61
White	Male	2004	Moderately differentiated; Grade II	IIIA	T2	N2	M0	Beam radiation	Yes	118	Dead	No Surgery Of Primary Site	70
White	Female	2004	Unknown	IIIA	T1	N2	M0	None/Unknown	No/Unknown	1	Dead	No Surgery Of Primary Site	58
White	Male	2004	Poorly differentiated; Grade III	IA	T1	N0	M0	None/Unknown	No/Unknown	25	Dead	Partial/Wedge/Segmental Resec., Lingulectomy, Partial Lobectomy, Sleeve Resec.	74
White	Male	2004	Unknown	IA	T1	N0	M0	None/Unknown	No/Unknown	16	Dead	No Surgery Of Primary Site	88
White	Male	2004	Poorly differentiated; Grade III	IA	T1	N0	M0	None/Unknown	No/Unknown	39	Dead	No Surgery Of Primary Site	75
White	Male	2004	Moderately differentiated; Grade II	IA	T1	N0	M0	Beam radiation	Yes	139	Alive	Lobectomy/Bilobectomy	67
Black	Male	2004	Moderately differentiated; Grade II	IA	T1	N0	M0	None/Unknown	No/Unknown	69	Dead	Lobectomy/Bilobectomy	55
Black	Male	2004	Unknown	IV	T1	N2	M1	None/Unknown	Yes	0	Dead	No Surgery Of Primary Site	85
White	Male	2004	Moderately differentiated; Grade II	IA	T1	N0	M0	None/Unknown	No/Unknown	118	Dead	Lobectomy/Bilobectomy	71
White	Female	2004	Moderately differentiated; Grade II	IA	T1	N0	M0	Beam radiation	Yes	21	Dead	Lobectomy/Bilobectomy	76
White	Male	2004	Poorly differentiated; Grade III	IB	T2	N0	M0	None/Unknown	No/Unknown	43	Dead	Lobectomy/Bilobectomy	79
White	Male	2004	Moderately differentiated; Grade II	IA	T1	N0	M0	None/Unknown	No/Unknown	25	Dead	Lobectomy/Bilobectomy	79
Black	Male	2004	Poorly differentiated; Grade III	IV	T4	N2	M1	None/Unknown	No/Unknown	1	Dead	No Surgery Of Primary Site	64
White	Male	2004	Poorly differentiated; Grade III	IB	T2	N0	M0	None/Unknown	No/Unknown	64	Dead	Lobectomy/Bilobectomy	64
White	Female	2004	Poorly differentiated; Grade III	IA	T1	N0	M0	None/Unknown	Yes	138	Alive	Lobectomy/Bilobectomy	68
White	Male	2004	Unknown	IA	T1	N0	M0	None/Unknown	No/Unknown	16	Dead	No Surgery Of Primary Site	82
White	Female	2004	Moderately differentiated; Grade II	IIB	T2	N1	M0	None/Unknown	No/Unknown	61	Dead	Lobectomy/Bilobectomy	75
White	Male	2004	Unknown	IV	T1	N2	M1	None/Unknown	No/Unknown	6	Dead	No Surgery Of Primary Site	65
White	Male	2004	Moderately differentiated; Grade II	IA	T1	N0	M0	None/Unknown	No/Unknown	134	Dead	Lobectomy/Bilobectomy	67
White	Male	2004	Poorly differentiated; Grade III	IA	T1	N0	M0	None/Unknown	Yes	55	Dead	Lobectomy/Bilobectomy	83
White	Female	2004	Well differentiated; Grade I	IIIB	T4	N0	M0	None/Unknown	No/Unknown	138	Alive	Lobectomy/Bilobectomy	49
White	Male	2004	Poorly differentiated; Grade III	IA	T1	N0	M0	None/Unknown	No/Unknown	15	Dead	Partial/Wedge/Segmental Resec., Lingulectomy, Partial Lobectomy, Sleeve Resec.	79
White	Male	2004	Poorly differentiated; Grade III	IV	T4	N2	M1	Beam radiation	No/Unknown	1	Dead	No Surgery Of Primary Site	60
White	Male	2004	Moderately differentiated; Grade II	IA	T1	N0	M0	Beam radiation	No/Unknown	17	Dead	Local Surgical Excision Or Destruction Of Lesion	80
Other (American Indian/AK Native, Asian/Pacific Islander)	Male	2004	Moderately differentiated; Grade II	IIIA	T1	N2	M0	None/Unknown	No/Unknown	15	Dead	Lobectomy/Bilobectomy	79
White	Female	2004	Poorly differentiated; Grade III	IIIB	T1	N3	M0	Beam radiation	Yes	8	Dead	No Surgery Of Primary Site	82
White	Male	2004	Moderately differentiated; Grade II	IA	T1	N0	M0	None/Unknown	No/Unknown	59	Dead	Lobectomy/Bilobectomy	72
White	Male	2004	Poorly differentiated; Grade III	IIIA	T1	N2	M0	None/Unknown	No/Unknown	135	Alive	Lobectomy/Bilobectomy	62
White	Female	2004	Poorly differentiated; Grade III	IA	T1	N0	M0	None/Unknown	Yes	66	Dead	No Surgery Of Primary Site	68
White	Male	2004	Poorly differentiated; Grade III	IA	T1	N0	M0	None/Unknown	No/Unknown	34	Dead	Lobectomy/Bilobectomy	75
White	Female	2004	Poorly differentiated; Grade III	IA	T1	N0	M0	None/Unknown	No/Unknown	38	Dead	Lobectomy/Bilobectomy	69
White	Male	2004	Moderately differentiated; Grade II	IV	T4	N0	M1	Beam radiation	No/Unknown	1	Dead	No Surgery Of Primary Site	78
White	Male	2004	Unknown	IA	T1	N0	M0	None/Unknown	No/Unknown	0	Dead	Lobectomy/Bilobectomy	51
White	Female	2004	Unknown	IIA	T1	N1	M0	Beam radiation	Yes	54	Dead	No Surgery Of Primary Site	70
White	Female	2004	Moderately differentiated; Grade II	IA	T1	N0	M0	None/Unknown	No/Unknown	48	Dead	Lobectomy/Bilobectomy	72
White	Male	2004	Poorly differentiated; Grade III	IV	T4	N0	M1	Beam radiation	Yes	9	Dead	No Surgery Of Primary Site	80
White	Female	2004	Moderately differentiated; Grade II	IIIA	T1	N2	M0	None/Unknown	No/Unknown	1	Dead	No Surgery Of Primary Site	77
White	Female	2004	Moderately differentiated; Grade II	IIIB	T4	N3	M0	None/Unknown	No/Unknown	3	Dead	No Surgery Of Primary Site	79
White	Male	2004	Poorly differentiated; Grade III	IB	T2	N0	M0	None/Unknown	No/Unknown	136	Alive	Complete/Total/Standard Pneumonectomy; Pneumonectomy, Nos	55
White	Male	2004	Moderately differentiated; Grade II	IA	T1	N0	M0	None/Unknown	No/Unknown	93	Dead	Partial/Wedge/Segmental Resec., Lingulectomy, Partial Lobectomy, Sleeve Resec.	78
White	Male	2004	Poorly differentiated; Grade III	IA	T1	N0	M0	None/Unknown	No/Unknown	24	Dead	Lobectomy/Bilobectomy	78
White	Female	2004	Moderately differentiated; Grade II	IA	T1	N0	M0	None/Unknown	No/Unknown	73	Dead	No Surgery Of Primary Site	73
White	Male	2004	Poorly differentiated; Grade III	IA	T1	N0	M0	None/Unknown	No/Unknown	96	Dead	Lobectomy/Bilobectomy	74
White	Female	2004	Poorly differentiated; Grade III	IIB	T3	N0	M0	None/Unknown	No/Unknown	137	Alive	Lobectomy/Bilobectomy	61
White	Female	2004	Unknown	IA	T1	N0	M0	Beam radiation	No/Unknown	47	Dead	No Surgery Of Primary Site	57
White	Male	2004	Poorly differentiated; Grade III	IA	T1	N0	M0	None/Unknown	No/Unknown	13	Dead	Partial/Wedge/Segmental Resec., Lingulectomy, Partial Lobectomy, Sleeve Resec.	68
White	Female	2004	Poorly differentiated; Grade III	IA	T1	N0	M0	None/Unknown	No/Unknown	136	Alive	Lobectomy/Bilobectomy	59
White	Male	2004	Moderately differentiated; Grade II	IIIA	T1	N2	M0	Beam radiation	Yes	46	Dead	Radical Pneumonectomy (Complete Pneumonectomy Plus Dissection Of Mediastinal LN)	53
White	Female	2004	Poorly differentiated; Grade III	IA	T1	N0	M0	None/Unknown	No/Unknown	141	Alive	Lobectomy/Bilobectomy	66
White	Female	2004	Poorly differentiated; Grade III	IB	T2	N0	M0	None/Unknown	No/Unknown	137	Alive	Lobectomy/Bilobectomy	61
White	Male	2004	Moderately differentiated; Grade II	IV	T2	N0	M1	Beam radiation	Yes	7	Dead	No Surgery Of Primary Site	60
White	Male	2004	Poorly differentiated; Grade III	IIIB	T1	N3	M0	Beam radiation	No/Unknown	6	Dead	No Surgery Of Primary Site	48
White	Male	2004	Well differentiated; Grade I	IA	T1	N0	M0	None/Unknown	No/Unknown	132	Alive	Lobectomy/Bilobectomy	70
White	Male	2004	Moderately differentiated; Grade II	IA	T1	N0	M0	None/Unknown	No/Unknown	18	Dead	No Surgery Of Primary Site	62
White	Female	2004	Moderately differentiated; Grade II	IIA	T1	N1	M0	None/Unknown	Yes	18	Dead	Lobectomy/Bilobectomy	64
White	Male	2004	Poorly differentiated; Grade III	IIIA	T2	N2	M0	Beam radiation	Yes	19	Dead	No Surgery Of Primary Site	73
Black	Male	2004	Moderately differentiated; Grade II	IIA	T1	N1	M0	None/Unknown	No/Unknown	9	Dead	No Surgery Of Primary Site	63
White	Male	2004	Poorly differentiated; Grade III	IA	T1	N0	M0	None/Unknown	No/Unknown	19	Dead	Lobectomy/Bilobectomy	76
White	Male	2004	Poorly differentiated; Grade III	IA	T1	N0	M0	None/Unknown	No/Unknown	114	Dead	Lobectomy/Bilobectomy	69
Black	Male	2004	Moderately differentiated; Grade II	IB	T2	N0	M0	None/Unknown	No/Unknown	71	Dead	Lobectomy/Bilobectomy	57
White	Female	2004	Well differentiated; Grade I	IA	T1	N0	M0	None/Unknown	No/Unknown	17	Dead	No Surgery Of Primary Site	83
White	Female	2004	Moderately differentiated; Grade II	IIIA	T1	N2	M0	Beam radiation	Yes	15	Dead	No Surgery Of Primary Site	75
White	Male	2004	Poorly differentiated; Grade III	IA	T1	N0	M0	None/Unknown	No/Unknown	6	Dead	Extended Pneumonectomy	76
White	Male	2004	Poorly differentiated; Grade III	IIIB	T4	N2	M0	Beam radiation	Yes	3	Dead	No Surgery Of Primary Site	63
White	Male	2004	Moderately differentiated; Grade II	IA	T1	N0	M0	None/Unknown	No/Unknown	18	Dead	Lobectomy/Bilobectomy	74
White	Male	2004	Moderately differentiated; Grade II	IIIA	T1	N2	M0	Beam radiation	Yes	57	Dead	No Surgery Of Primary Site	60
White	Female	2004	Unknown	IV	T1	N0	M1	None/Unknown	No/Unknown	6	Dead	No Surgery Of Primary Site	68
White	Male	2004	Poorly differentiated; Grade III	IA	T1	N0	M0	None/Unknown	No/Unknown	81	Dead	Partial/Wedge/Segmental Resec., Lingulectomy, Partial Lobectomy, Sleeve Resec.	80
Black	Male	2004	Moderately differentiated; Grade II	IA	T1	N0	M0	None/Unknown	No/Unknown	137	Alive	Partial/Wedge/Segmental Resec., Lingulectomy, Partial Lobectomy, Sleeve Resec.	58
White	Female	2004	Poorly differentiated; Grade III	IA	T1	N0	M0	None/Unknown	No/Unknown	132	Alive	Partial/Wedge/Segmental Resec., Lingulectomy, Partial Lobectomy, Sleeve Resec.	68
White	Female	2004	Moderately differentiated; Grade II	IB	T2	N0	M0	None/Unknown	No/Unknown	16	Dead	Partial/Wedge/Segmental Resec., Lingulectomy, Partial Lobectomy, Sleeve Resec.	71
White	Female	2004	Moderately differentiated; Grade II	IA	T1	N0	M0	None/Unknown	No/Unknown	25	Dead	Lobectomy/Bilobectomy	70
White	Male	2004	Poorly differentiated; Grade III	IA	T1	N0	M0	None/Unknown	No/Unknown	134	Alive	Lobectomy/Bilobectomy	62
White	Female	2004	Poorly differentiated; Grade III	IA	T1	N0	M0	None/Unknown	No/Unknown	15	Dead	Lobectomy/Bilobectomy	65
White	Female	2004	Moderately differentiated; Grade II	IA	T1	N0	M0	None/Unknown	No/Unknown	139	Alive	Lobectomy/Bilobectomy	61
Black	Male	2004	Moderately differentiated; Grade II	IA	T1	N0	M0	None/Unknown	No/Unknown	71	Dead	Lobectomy/Bilobectomy	64
White	Female	2004	Poorly differentiated; Grade III	IA	T1	N0	M0	None/Unknown	No/Unknown	31	Dead	Lobectomy/Bilobectomy	75
White	Male	2004	Moderately differentiated; Grade II	IA	T1	N0	M0	None/Unknown	No/Unknown	4	Dead	Partial/Wedge/Segmental Resec., Lingulectomy, Partial Lobectomy, Sleeve Resec.	74
White	Male	2004	Poorly differentiated; Grade III	IV	T4	N2	M1	Beam radiation	Yes	11	Dead	No Surgery Of Primary Site	59
White	Female	2004	Poorly differentiated; Grade III	IIIA	T1	N2	M0	None/Unknown	No/Unknown	0	Dead	Lobectomy/Bilobectomy	77
White	Male	2004	Unknown	IV	T1	N0	M1	None/Unknown	Yes	6	Dead	No Surgery Of Primary Site	69
White	Female	2004	Moderately differentiated; Grade II	IA	T1	N0	M0	None/Unknown	No/Unknown	118	Dead	Lobectomy/Bilobectomy	67
White	Female	2004	Unknown	IA	T1	N0	M0	Beam radiation	No/Unknown	24	Dead	No Surgery Of Primary Site	76
White	Male	2004	Poorly differentiated; Grade III	IA	T1	N0	M0	None/Unknown	No/Unknown	43	Dead	Partial/Wedge/Segmental Resec., Lingulectomy, Partial Lobectomy, Sleeve Resec.	65
White	Male	2004	Poorly differentiated; Grade III	IA	T1	N0	M0	None/Unknown	No/Unknown	83	Dead	Lobectomy/Bilobectomy	74
White	Male	2004	Moderately differentiated; Grade II	IIIA	T1	N2	M0	Beam radiation	Yes	134	Dead	Lobectomy/Bilobectomy	61
White	Female	2004	Poorly differentiated; Grade III	IA	T1	N0	M0	None/Unknown	No/Unknown	57	Dead	Lobectomy/Bilobectomy	76
White	Male	2004	Moderately differentiated; Grade II	IA	T1	N0	M0	None/Unknown	No/Unknown	118	Dead	Lobectomy/Bilobectomy	73
White	Female	2004	Moderately differentiated; Grade II	IB	T2	N0	M0	None/Unknown	No/Unknown	131	Dead	Lobectomy/Bilobectomy	76
White	Male	2004	Poorly differentiated; Grade III	IA	T1	N0	M0	None/Unknown	No/Unknown	141	Alive	Lobectomy/Bilobectomy	73
Black	Male	2004	Unknown	IIA	T1	N1	M0	Beam radiation	Yes	27	Dead	No Surgery Of Primary Site	58
White	Female	2004	Moderately differentiated; Grade II	IA	T1	N0	M0	None/Unknown	No/Unknown	96	Dead	Lobectomy/Bilobectomy	78
Black	Male	2004	Unknown	IB	T2	N0	M0	None/Unknown	No/Unknown	137	Alive	Partial/Wedge/Segmental Resec., Lingulectomy, Partial Lobectomy, Sleeve Resec.	76
White	Male	2004	Moderately differentiated; Grade II	IB	T2	N0	M0	None/Unknown	No/Unknown	28	Dead	No Surgery Of Primary Site	59
Black	Female	2004	Unknown	IV	T4	N3	M1	None/Unknown	Yes	11	Dead	No Surgery Of Primary Site	57
Black	Male	2004	Poorly differentiated; Grade III	IIIA	T2	N2	M0	Beam radiation	Yes	7	Dead	No Surgery Of Primary Site	74
White	Female	2004	Poorly differentiated; Grade III	IV	T2	N1	M1	Beam radiation	Yes	20	Dead	Complete/Total/Standard Pneumonectomy; Pneumonectomy, Nos	65
White	Male	2004	Poorly differentiated; Grade III	IV	T2	N1	M1	Beam radiation	Yes	0	Dead	No Surgery Of Primary Site	49
White	Male	2004	Moderately differentiated; Grade II	IIIA	T2	N2	M0	None/Unknown	No/Unknown	10	Dead	Radical Pneumonectomy (Complete Pneumonectomy Plus Dissection Of Mediastinal LN)	62
White	Male	2004	Moderately differentiated; Grade II	IA	T1	N0	M0	None/Unknown	No/Unknown	89	Dead	Partial/Wedge/Segmental Resec., Lingulectomy, Partial Lobectomy, Sleeve Resec.	76
White	Male	2004	Moderately differentiated; Grade II	IIB	T3	N0	M0	None/Unknown	Yes	40	Dead	Lobectomy/Bilobectomy	64
White	Male	2004	Moderately differentiated; Grade II	IIA	T1	N1	M0	None/Unknown	Yes	22	Dead	No Surgery Of Primary Site	72
White	Male	2004	Poorly differentiated; Grade III	IA	T1	N0	M0	None/Unknown	No/Unknown	73	Dead	Lobectomy/Bilobectomy	74
White	Female	2004	Unknown	IIIB	T4	N0	M0	Beam radiation	Yes	36	Dead	No Surgery Of Primary Site	75
White	Male	2004	Poorly differentiated; Grade III	IIIB	T1	N3	M0	None/Unknown	Yes	12	Dead	No Surgery Of Primary Site	45
White	Female	2004	Moderately differentiated; Grade II	IA	T1	N0	M0	None/Unknown	No/Unknown	81	Dead	Lobectomy/Bilobectomy	67
White	Male	2004	Poorly differentiated; Grade III	IB	T2	N0	M0	None/Unknown	No/Unknown	0	Dead	Partial/Wedge/Segmental Resec., Lingulectomy, Partial Lobectomy, Sleeve Resec.	79
White	Female	2004	Poorly differentiated; Grade III	IA	T1	N0	M0	None/Unknown	No/Unknown	4	Dead	Lobectomy/Bilobectomy	76
Black	Male	2004	Unknown	IIIA	T1	N2	M0	None/Unknown	Yes	15	Dead	No Surgery Of Primary Site	76
Other (American Indian/AK Native, Asian/Pacific Islander)	Male	2004	Moderately differentiated; Grade II	IA	T1	N0	M0	None/Unknown	No/Unknown	35	Dead	Lobectomy/Bilobectomy	81
White	Female	2004	Moderately differentiated; Grade II	IB	T2	N0	M0	None/Unknown	No/Unknown	38	Dead	Complete/Total/Standard Pneumonectomy; Pneumonectomy, Nos	74
White	Female	2004	Moderately differentiated; Grade II	IV	T4	N0	M1	None/Unknown	No/Unknown	1	Dead	No Surgery Of Primary Site	63
White	Male	2004	Poorly differentiated; Grade III	IA	T1	N0	M0	None/Unknown	No/Unknown	96	Dead	Partial/Wedge/Segmental Resec., Lingulectomy, Partial Lobectomy, Sleeve Resec.	62
White	Female	2004	Unknown	IA	T1	N0	M0	Beam radiation	Yes	75	Dead	No Surgery Of Primary Site	76
White	Female	2004	Poorly differentiated; Grade III	IA	T1	N0	M0	Beam radiation	No/Unknown	38	Dead	No Surgery Of Primary Site	88
White	Male	2004	Poorly differentiated; Grade III	IA	T1	N0	M0	None/Unknown	No/Unknown	118	Dead	Lobectomy/Bilobectomy	62
White	Female	2004	Moderately differentiated; Grade II	IA	T1	N0	M0	None/Unknown	Yes	9	Dead	Lobectomy/Bilobectomy	70
White	Male	2004	Poorly differentiated; Grade III	IA	T1	N0	M0	None/Unknown	No/Unknown	136	Alive	Lobectomy/Bilobectomy	57
Other (American Indian/AK Native, Asian/Pacific Islander)	Female	2004	Unknown	IV	T1	N2	M1	None/Unknown	Yes	15	Dead	No Surgery Of Primary Site	56
White	Male	2004	Moderately differentiated; Grade II	IA	T1	N0	M0	None/Unknown	No/Unknown	28	Dead	Lobectomy/Bilobectomy	75
Black	Male	2004	Poorly differentiated; Grade III	IIIA	T1	N2	M0	None/Unknown	No/Unknown	27	Dead	Partial/Wedge/Segmental Resec., Lingulectomy, Partial Lobectomy, Sleeve Resec.	80
White	Male	2004	Moderately differentiated; Grade II	IV	T4	N1	M1	Beam radiation	No/Unknown	4	Dead	No Surgery Of Primary Site	80
White	Male	2004	Moderately differentiated; Grade II	IA	T1	N0	M0	None/Unknown	No/Unknown	133	Alive	Lobectomy/Bilobectomy	54
White	Female	2004	Poorly differentiated; Grade III	IB	T2	N0	M0	None/Unknown	Yes	16	Dead	Lobectomy/Bilobectomy	68
White	Female	2004	Poorly differentiated; Grade III	IA	T1	N0	M0	None/Unknown	No/Unknown	30	Dead	Partial/Wedge/Segmental Resec., Lingulectomy, Partial Lobectomy, Sleeve Resec.	76
White	Male	2004	Unknown	IA	T1	N0	M0	None/Unknown	No/Unknown	0	Dead	Partial/Wedge/Segmental Resec., Lingulectomy, Partial Lobectomy, Sleeve Resec.	74
White	Male	2004	Well differentiated; Grade I	IA	T1	N0	M0	None/Unknown	No/Unknown	29	Dead	Lobectomy/Bilobectomy	81
White	Female	2004	Poorly differentiated; Grade III	IA	T1	N0	M0	None/Unknown	No/Unknown	4	Dead	Partial/Wedge/Segmental Resec., Lingulectomy, Partial Lobectomy, Sleeve Resec.	81
White	Female	2004	Unknown	IIIA	T1	N2	M0	None/Unknown	No/Unknown	73	Dead	Lobectomy/Bilobectomy	69
White	Male	2004	Unknown	IIIA	T1	N2	M0	Beam radiation	Yes	58	Dead	No Surgery Of Primary Site	65
White	Female	2004	Poorly differentiated; Grade III	IA	T1	N0	M0	None/Unknown	No/Unknown	1	Dead	Partial/Wedge/Segmental Resec., Lingulectomy, Partial Lobectomy, Sleeve Resec.	77
White	Female	2004	Unknown	IA	T1	N0	M0	Beam radiation	No/Unknown	4	Dead	No Surgery Of Primary Site	78
White	Female	2004	Poorly differentiated; Grade III	IA	T1	N0	M0	None/Unknown	No/Unknown	92	Dead	Lobectomy/Bilobectomy	75
White	Male	2004	Poorly differentiated; Grade III	IIB	T2	N1	M0	Beam radiation	No/Unknown	10	Dead	No Surgery Of Primary Site	78
Black	Male	2004	Unknown	IV	T1	N2	M1	None/Unknown	No/Unknown	2	Dead	No Surgery Of Primary Site	80
White	Male	2004	Poorly differentiated; Grade III	IV	T1	N0	M1	Beam radiation	No/Unknown	9	Dead	No Surgery Of Primary Site	95
White	Male	2004	Unknown	IIIB	T4	N0	M0	None/Unknown	Yes	3	Dead	No Surgery Of Primary Site	49
White	Male	2004	Moderately differentiated; Grade II	IB	T2	N0	M0	None/Unknown	No/Unknown	22	Dead	Partial/Wedge/Segmental Resec., Lingulectomy, Partial Lobectomy, Sleeve Resec.	68
White	Female	2004	Moderately differentiated; Grade II	IA	T1	N0	M0	None/Unknown	No/Unknown	44	Dead	Partial/Wedge/Segmental Resec., Lingulectomy, Partial Lobectomy, Sleeve Resec.	69
White	Female	2004	Unknown	IIB	T2	N1	M0	Beam radiation	Yes	9	Dead	No Surgery Of Primary Site	74
White	Female	2004	Poorly differentiated; Grade III	IB	T2	N0	M0	None/Unknown	No/Unknown	141	Alive	Lobectomy/Bilobectomy	62
Black	Male	2004	Moderately differentiated; Grade II	IA	T1	N0	M0	None/Unknown	No/Unknown	82	Dead	Lobectomy/Bilobectomy	60
White	Male	2004	Moderately differentiated; Grade II	IIIA	T1	N2	M0	Beam radiation	Yes	6	Dead	No Surgery Of Primary Site	61
White	Male	2004	Poorly differentiated; Grade III	IA	T1	N0	M0	None/Unknown	No/Unknown	56	Dead	Lobectomy/Bilobectomy	69
White	Female	2004	Moderately differentiated; Grade II	IA	T1	N0	M0	None/Unknown	No/Unknown	9	Dead	Lobectomy/Bilobectomy	68
White	Male	2004	Poorly differentiated; Grade III	IB	T2	N0	M0	None/Unknown	No/Unknown	133	Alive	Partial/Wedge/Segmental Resec., Lingulectomy, Partial Lobectomy, Sleeve Resec.	65
White	Male	2004	Poorly differentiated; Grade III	IV	T1	N0	M1	Beam radiation	Yes	6	Dead	No Surgery Of Primary Site	66
White	Male	2004	Unknown	IIIA	T1	N2	M0	Beam radiation	No/Unknown	17	Dead	No Surgery Of Primary Site	87
Black	Female	2004	Poorly differentiated; Grade III	IA	T1	N0	M0	None/Unknown	No/Unknown	114	Dead	Lobectomy/Bilobectomy	58
White	Male	2004	Poorly differentiated; Grade III	IA	T1	N0	M0	None/Unknown	No/Unknown	76	Dead	Partial/Wedge/Segmental Resec., Lingulectomy, Partial Lobectomy, Sleeve Resec.	68
White	Female	2004	Unknown	IV	T4	N0	M1	None/Unknown	No/Unknown	1	Dead	No Surgery Of Primary Site	81
White	Male	2004	Poorly differentiated; Grade III	IA	T1	N0	M0	None/Unknown	No/Unknown	27	Dead	Partial/Wedge/Segmental Resec., Lingulectomy, Partial Lobectomy, Sleeve Resec.	87
Black	Male	2004	Poorly differentiated; Grade III	IIIB	T4	N2	M0	Beam radiation	Yes	27	Dead	No Surgery Of Primary Site	68
White	Male	2004	Moderately differentiated; Grade II	IIA	T1	N1	M0	None/Unknown	No/Unknown	115	Dead	Partial/Wedge/Segmental Resec., Lingulectomy, Partial Lobectomy, Sleeve Resec.	76
White	Male	2004	Poorly differentiated; Grade III	IA	T1	N0	M0	None/Unknown	No/Unknown	68	Dead	Lobectomy/Bilobectomy	71
White	Female	2004	Unknown	IA	T1	N0	M0	Beam radiation	No/Unknown	13	Dead	Local Surgical Excision Or Destruction Of Lesion	57
White	Female	2004	Unknown	IA	T1	N0	M0	None/Unknown	No/Unknown	132	Alive	Lobectomy/Bilobectomy	60
White	Female	2004	Unknown	IV	T1	N1	M1	None/Unknown	Yes	7	Dead	No Surgery Of Primary Site	54
White	Female	2004	Poorly differentiated; Grade III	IIIB	T4	N0	M0	None/Unknown	No/Unknown	83	Dead	Lobectomy/Bilobectomy	78
White	Female	2004	Poorly differentiated; Grade III	IA	T1	N0	M0	Beam radiation	No/Unknown	67	Dead	No Surgery Of Primary Site	78
White	Male	2004	Moderately differentiated; Grade II	IIA	T1	N1	M0	None/Unknown	Yes	8	Dead	Lobectomy/Bilobectomy	61
White	Male	2004	Poorly differentiated; Grade III	IA	T1	N0	M0	None/Unknown	No/Unknown	12	Dead	Lobectomy/Bilobectomy	60
White	Female	2004	Poorly differentiated; Grade III	IIIA	T1	N2	M0	None/Unknown	No/Unknown	0	Dead	Lobectomy/Bilobectomy	75
White	Male	2004	Unknown	IIA	T1	N1	M0	None/Unknown	No/Unknown	0	Dead	Lobectomy/Bilobectomy	66
White	Male	2004	Poorly differentiated; Grade III	IA	T1	N0	M0	None/Unknown	No/Unknown	57	Dead	Partial/Wedge/Segmental Resec., Lingulectomy, Partial Lobectomy, Sleeve Resec.	81
White	Male	2004	Unknown	IA	T1	N0	M0	Beam radiation	No/Unknown	31	Dead	No Surgery Of Primary Site	73
White	Female	2004	Unknown	IIIA	T1	N2	M0	None/Unknown	Yes	12	Dead	No Surgery Of Primary Site	76
White	Male	2004	Moderately differentiated; Grade II	IB	T2	N0	M0	None/Unknown	No/Unknown	10	Dead	Lobectomy/Bilobectomy	76
White	Female	2004	Poorly differentiated; Grade III	IA	T1	N0	M0	None/Unknown	Yes	31	Dead	Lobectomy/Bilobectomy	84
White	Male	2004	Well differentiated; Grade I	IA	T1	N0	M0	None/Unknown	No/Unknown	138	Alive	Lobectomy/Bilobectomy	76
White	Female	2004	Unknown	IA	T1	N0	M0	Refused	No/Unknown	100	Dead	No Surgery Of Primary Site	83
White	Female	2004	Unknown	IV	T1	N2	M1	None/Unknown	Yes	13	Dead	No Surgery Of Primary Site	61
White	Male	2004	Moderately differentiated; Grade II	IA	T1	N0	M0	None/Unknown	No/Unknown	46	Dead	Lobectomy/Bilobectomy	76
White	Female	2004	Poorly differentiated; Grade III	IIIB	T4	N0	M0	Beam radiation	Yes	139	Alive	No Surgery Of Primary Site	71
White	Female	2004	Poorly differentiated; Grade III	IA	T1	N0	M0	None/Unknown	No/Unknown	111	Dead	Lobectomy/Bilobectomy	74
White	Female	2004	Poorly differentiated; Grade III	IA	T1	N0	M0	None/Unknown	No/Unknown	40	Dead	Partial/Wedge/Segmental Resec., Lingulectomy, Partial Lobectomy, Sleeve Resec.	70
White	Female	2004	Moderately differentiated; Grade II	IA	T1	N0	M0	None/Unknown	No/Unknown	86	Dead	Partial/Wedge/Segmental Resec., Lingulectomy, Partial Lobectomy, Sleeve Resec.	55
White	Female	2004	Unknown	IA	T1	N0	M0	Beam radiation	No/Unknown	25	Dead	No Surgery Of Primary Site	81
White	Male	2004	Moderately differentiated; Grade II	IA	T1	N0	M0	None/Unknown	No/Unknown	105	Dead	Lobectomy/Bilobectomy	61
White	Male	2004	Moderately differentiated; Grade II	IA	T1	N0	M0	None/Unknown	No/Unknown	22	Dead	Lobectomy/Bilobectomy	55
White	Female	2004	Poorly differentiated; Grade III	IIIB	T4	N1	M0	None/Unknown	No/Unknown	101	Dead	Lobectomy/Bilobectomy	68
White	Female	2004	Moderately differentiated; Grade II	IA	T1	N0	M0	None/Unknown	No/Unknown	89	Dead	Lobectomy/Bilobectomy	78
Black	Female	2004	Unknown	IA	T1	N0	M0	Beam radiation	No/Unknown	65	Dead	No Surgery Of Primary Site	79
Black	Male	2004	Unknown	IV	T1	N0	M1	None/Unknown	No/Unknown	4	Dead	No Surgery Of Primary Site	68
White	Male	2004	Poorly differentiated; Grade III	IA	T1	N0	M0	None/Unknown	No/Unknown	46	Dead	Partial/Wedge/Segmental Resec., Lingulectomy, Partial Lobectomy, Sleeve Resec.	77
White	Male	2004	Moderately differentiated; Grade II	IB	T2	N0	M0	None/Unknown	No/Unknown	36	Dead	Partial/Wedge/Segmental Resec., Lingulectomy, Partial Lobectomy, Sleeve Resec.	65
White	Male	2004	Moderately differentiated; Grade II	IA	T1	N0	M0	None/Unknown	No/Unknown	79	Dead	Partial/Wedge/Segmental Resec., Lingulectomy, Partial Lobectomy, Sleeve Resec.	85
White	Male	2004	Unknown	IIIB	T4	N2	M0	None/Unknown	No/Unknown	2	Dead	No Surgery Of Primary Site	69
White	Female	2004	Poorly differentiated; Grade III	IA	T1	N0	M0	None/Unknown	No/Unknown	120	Dead	Partial/Wedge/Segmental Resec., Lingulectomy, Partial Lobectomy, Sleeve Resec.	64
Black	Female	2004	Poorly differentiated; Grade III	IA	T1	N0	M0	None/Unknown	No/Unknown	79	Dead	Lobectomy/Bilobectomy	74
Black	Female	2004	Moderately differentiated; Grade II	IA	T1	N0	M0	None/Unknown	No/Unknown	99	Dead	Lobectomy/Bilobectomy	63
White	Male	2004	Poorly differentiated; Grade III	IA	T1	N0	M0	None/Unknown	No/Unknown	44	Dead	Lobectomy/Bilobectomy	79
White	Female	2004	Well differentiated; Grade I	IA	T1	N0	M0	None/Unknown	No/Unknown	103	Dead	Lobectomy/Bilobectomy	75
White	Female	2004	Moderately differentiated; Grade II	IA	T1	N0	M0	None/Unknown	No/Unknown	1	Dead	Partial/Wedge/Segmental Resec., Lingulectomy, Partial Lobectomy, Sleeve Resec.	74
White	Female	2004	Moderately differentiated; Grade II	IIIA	T2	N2	M0	None/Unknown	No/Unknown	96	Dead	Complete/Total/Standard Pneumonectomy; Pneumonectomy, Nos	60
Black	Male	2004	Moderately differentiated; Grade II	IA	T1	N0	M0	None/Unknown	No/Unknown	48	Dead	Partial/Wedge/Segmental Resec., Lingulectomy, Partial Lobectomy, Sleeve Resec.	69
White	Female	2004	Moderately differentiated; Grade II	IA	T1	N0	M0	None/Unknown	No/Unknown	51	Dead	Lobectomy/Bilobectomy	78
White	Male	2004	Poorly differentiated; Grade III	IIIA	T3	N1	M0	None/Unknown	No/Unknown	74	Dead	Lobectomy/Bilobectomy	68
White	Male	2004	Well differentiated; Grade I	IA	T1	N0	M0	None/Unknown	No/Unknown	140	Alive	Lobectomy/Bilobectomy	71
White	Male	2004	Poorly differentiated; Grade III	IIIB	T4	N0	M0	None/Unknown	No/Unknown	28	Dead	Partial/Wedge/Segmental Resec., Lingulectomy, Partial Lobectomy, Sleeve Resec.	71
White	Female	2004	Unknown	IA	T1	N0	M0	None/Unknown	No/Unknown	39	Dead	No Surgery Of Primary Site	80
White	Male	2004	Unknown	IV	T4	N2	M1	None/Unknown	No/Unknown	2	Dead	No Surgery Of Primary Site	61
White	Male	2004	Poorly differentiated; Grade III	IA	T1	N0	M0	None/Unknown	No/Unknown	16	Dead	Lobectomy/Bilobectomy	72
White	Male	2004	Unknown	IIIA	T1	N2	M0	None/Unknown	No/Unknown	0	Alive	No Surgery Of Primary Site	37
White	Female	2004	Moderately differentiated; Grade II	IA	T1	N0	M0	None/Unknown	No/Unknown	59	Dead	Partial/Wedge/Segmental Resec., Lingulectomy, Partial Lobectomy, Sleeve Resec.	66
White	Female	2004	Poorly differentiated; Grade III	IA	T1	N0	M0	None/Unknown	No/Unknown	132	Dead	Lobectomy/Bilobectomy	65
White	Male	2004	Poorly differentiated; Grade III	IA	T1	N0	M0	None/Unknown	No/Unknown	80	Dead	Lobectomy/Bilobectomy	74
White	Female	2004	Moderately differentiated; Grade II	IIIB	T4	N0	M0	None/Unknown	No/Unknown	35	Dead	Lobectomy/Bilobectomy	65
White	Female	2004	Poorly differentiated; Grade III	IIA	T1	N1	M0	None/Unknown	Yes	139	Alive	Lobectomy/Bilobectomy	67
White	Male	2004	Moderately differentiated; Grade II	IV	T4	N3	M1	Beam radiation	Yes	25	Dead	No Surgery Of Primary Site	68
White	Male	2004	Moderately differentiated; Grade II	IIIB	T4	N2	M0	None/Unknown	Yes	27	Dead	No Surgery Of Primary Site	83
Other (American Indian/AK Native, Asian/Pacific Islander)	Female	2004	Unknown	IIIA	T1	N2	M0	Beam radiation	Yes	6	Dead	Lobectomy/Bilobectomy	57
White	Male	2004	Poorly differentiated; Grade III	IA	T1	N0	M0	None/Unknown	Yes	9	Dead	Partial/Wedge/Segmental Resec., Lingulectomy, Partial Lobectomy, Sleeve Resec.	56
White	Female	2004	Well differentiated; Grade I	IA	T1	N0	M0	None/Unknown	No/Unknown	85	Dead	Lobectomy/Bilobectomy	71
White	Male	2004	Poorly differentiated; Grade III	IV	T1	N0	M1	None/Unknown	No/Unknown	12	Dead	No Surgery Of Primary Site	66
White	Male	2004	Well differentiated; Grade I	IIIB	T4	N0	M0	None/Unknown	No/Unknown	34	Dead	Lobectomy/Bilobectomy	55
White	Female	2004	Moderately differentiated; Grade II	IA	T1	N0	M0	None/Unknown	No/Unknown	112	Dead	Lobectomy/Bilobectomy	71
Other (American Indian/AK Native, Asian/Pacific Islander)	Female	2004	Poorly differentiated; Grade III	IIIA	T2	N2	M0	Beam radiation	Yes	33	Dead	Lobectomy/Bilobectomy	61
White	Female	2004	Unknown	IIIB	T4	N0	M0	None/Unknown	No/Unknown	41	Dead	No Surgery Of Primary Site	84
Other (American Indian/AK Native, Asian/Pacific Islander)	Female	2004	Poorly differentiated; Grade III	IIIB	T4	N2	M0	Beam radiation	No/Unknown	12	Dead	No Surgery Of Primary Site	84
White	Female	2004	Poorly differentiated; Grade III	IA	T1	N0	M0	None/Unknown	No/Unknown	57	Dead	Lobectomy/Bilobectomy	68
White	Male	2004	Poorly differentiated; Grade III	IA	T1	N0	M0	None/Unknown	No/Unknown	58	Dead	Partial/Wedge/Segmental Resec., Lingulectomy, Partial Lobectomy, Sleeve Resec.	78
Black	Male	2004	Unknown	IV	T1	N2	M1	None/Unknown	No/Unknown	8	Dead	No Surgery Of Primary Site	83
White	Male	2004	Moderately differentiated; Grade II	IIIB	T4	N0	M0	None/Unknown	No/Unknown	70	Dead	Partial/Wedge/Segmental Resec., Lingulectomy, Partial Lobectomy, Sleeve Resec.	79
White	Female	2004	Moderately differentiated; Grade II	IA	T1	N0	M0	None/Unknown	No/Unknown	105	Dead	Partial/Wedge/Segmental Resec., Lingulectomy, Partial Lobectomy, Sleeve Resec.	60
White	Male	2004	Poorly differentiated; Grade III	IA	T1	N0	M0	None/Unknown	No/Unknown	18	Dead	Lobectomy/Bilobectomy	74
White	Female	2004	Poorly differentiated; Grade III	IA	T1	N0	M0	None/Unknown	No/Unknown	110	Dead	Lobectomy/Bilobectomy	75
White	Female	2004	Moderately differentiated; Grade II	IA	T1	N0	M0	None/Unknown	No/Unknown	1	Dead	No Surgery Of Primary Site	87
White	Female	2004	Poorly differentiated; Grade III	IA	T1	N0	M0	None/Unknown	No/Unknown	36	Dead	Lobectomy/Bilobectomy	84
White	Male	2004	Unknown	IA	T1	N0	M0	None/Unknown	No/Unknown	24	Dead	No Surgery Of Primary Site	77
Black	Male	2004	Well differentiated; Grade I	IIIA	T1	N2	M0	Beam radiation	Yes	14	Dead	Partial/Wedge/Segmental Resec., Lingulectomy, Partial Lobectomy, Sleeve Resec.	71
White	Female	2004	Poorly differentiated; Grade III	IA	T1	N0	M0	None/Unknown	No/Unknown	96	Dead	Lobectomy/Bilobectomy	62
White	Female	2004	Moderately differentiated; Grade II	IA	T1	N0	M0	None/Unknown	No/Unknown	5	Dead	Lobectomy/Bilobectomy	69
White	Male	2004	Poorly differentiated; Grade III	IA	T1	N0	M0	None/Unknown	No/Unknown	135	Alive	Lobectomy/Bilobectomy	53
White	Male	2004	Moderately differentiated; Grade II	IA	T1	N0	M0	None/Unknown	No/Unknown	94	Dead	Partial/Wedge/Segmental Resec., Lingulectomy, Partial Lobectomy, Sleeve Resec.	68
White	Male	2004	Poorly differentiated; Grade III	IA	T1	N0	M0	None/Unknown	No/Unknown	65	Dead	Lobectomy/Bilobectomy	59
White	Male	2004	Unknown	IIIA	T3	N2	M0	None/Unknown	Yes	34	Dead	No Surgery Of Primary Site	72
White	Female	2004	Unknown	IV	T4	N3	M1	Beam radiation	Yes	8	Dead	No Surgery Of Primary Site	80
White	Female	2004	Poorly differentiated; Grade III	IIIB	T1	N3	M0	None/Unknown	Yes	24	Dead	No Surgery Of Primary Site	70
Black	Female	2004	Poorly differentiated; Grade III	IIIA	T2	N2	M0	Beam radiation	Yes	6	Dead	No Surgery Of Primary Site	86
White	Male	2004	Poorly differentiated; Grade III	IA	T1	N0	M0	None/Unknown	No/Unknown	128	Dead	Partial/Wedge/Segmental Resec., Lingulectomy, Partial Lobectomy, Sleeve Resec.	57
White	Male	2004	Moderately differentiated; Grade II	IA	T1	N0	M0	None/Unknown	No/Unknown	122	Dead	Lobectomy/Bilobectomy	72
White	Male	2004	Unknown	IA	T1	N0	M0	None/Unknown	No/Unknown	8	Dead	No Surgery Of Primary Site	69
White	Female	2004	Unknown	IA	T1	N0	M0	Beam radiation	No/Unknown	21	Dead	No Surgery Of Primary Site	84
White	Male	2004	Moderately differentiated; Grade II	IA	T1	N0	M0	None/Unknown	No/Unknown	18	Dead	Partial/Wedge/Segmental Resec., Lingulectomy, Partial Lobectomy, Sleeve Resec.	81
White	Male	2004	Moderately differentiated; Grade II	IA	T1	N0	M0	None/Unknown	No/Unknown	79	Dead	Lobectomy/Bilobectomy	62
White	Female	2004	Unknown	IA	T1	N0	M0	None/Unknown	No/Unknown	62	Dead	Lobectomy/Bilobectomy	61
White	Female	2004	Poorly differentiated; Grade III	IA	T1	N0	M0	None/Unknown	No/Unknown	16	Dead	Partial/Wedge/Segmental Resec., Lingulectomy, Partial Lobectomy, Sleeve Resec.	84
White	Male	2004	Poorly differentiated; Grade III	IA	T1	N0	M0	None/Unknown	No/Unknown	23	Dead	Partial/Wedge/Segmental Resec., Lingulectomy, Partial Lobectomy, Sleeve Resec.	75
White	Female	2004	Unknown	IIIB	T3	N3	M0	Beam radiation	Yes	2	Dead	No Surgery Of Primary Site	72
White	Female	2004	Poorly differentiated; Grade III	IA	T1	N0	M0	None/Unknown	No/Unknown	43	Dead	Lobectomy/Bilobectomy	62
White	Male	2004	Poorly differentiated; Grade III	IA	T1	N0	M0	None/Unknown	No/Unknown	21	Dead	Lobectomy/Bilobectomy	62
Black	Male	2004	Moderately differentiated; Grade II	IIIB	T4	N0	M0	None/Unknown	No/Unknown	88	Dead	Lobectomy/Bilobectomy	71
White	Female	2004	Poorly differentiated; Grade III	IIIA	T1	N2	M0	Beam radiation	Yes	16	Dead	No Surgery Of Primary Site	77
White	Female	2004	Unknown	IIA	T1	N1	M0	Beam radiation	Yes	81	Dead	No Surgery Of Primary Site	63
White	Female	2004	Unknown	IIB	T3	N0	M0	Beam radiation	Yes	26	Dead	No Surgery Of Primary Site	63
White	Male	2004	Poorly differentiated; Grade III	IIA	T1	N1	M0	None/Unknown	Yes	90	Dead	Lobectomy/Bilobectomy	71
White	Male	2004	Poorly differentiated; Grade III	IA	T1	N0	M0	None/Unknown	No/Unknown	7	Dead	Lobectomy/Bilobectomy	79
White	Female	2004	Moderately differentiated; Grade II	IA	T1	N0	M0	None/Unknown	No/Unknown	45	Dead	Lobectomy/Bilobectomy	57
White	Male	2004	Poorly differentiated; Grade III	IV	T1	N0	M1	None/Unknown	No/Unknown	10	Dead	No Surgery Of Primary Site	84
White	Female	2004	Moderately differentiated; Grade II	IB	T2	N0	M0	None/Unknown	No/Unknown	114	Dead	Lobectomy/Bilobectomy	73
Black	Male	2004	Unknown	IV	T4	N3	M1	Beam radiation	Yes	5	Dead	No Surgery Of Primary Site	47
White	Female	2004	Moderately differentiated; Grade II	IIIA	T2	N2	M0	Beam radiation	Yes	26	Dead	Lobectomy/Bilobectomy	60
Other (American Indian/AK Native, Asian/Pacific Islander)	Male	2004	Moderately differentiated; Grade II	IIIA	T2	N2	M0	None/Unknown	No/Unknown	9	Dead	Partial/Wedge/Segmental Resec., Lingulectomy, Partial Lobectomy, Sleeve Resec.	72
White	Male	2004	Unknown	IIIA	T1	N2	M0	Beam radiation	Yes	52	Dead	No Surgery Of Primary Site	78
White	Female	2004	Moderately differentiated; Grade II	IA	T1	N0	M0	None/Unknown	No/Unknown	14	Dead	Partial/Wedge/Segmental Resec., Lingulectomy, Partial Lobectomy, Sleeve Resec.	75
Black	Male	2004	Unknown	IV	T1	N2	M1	Beam radiation	No/Unknown	2	Dead	No Surgery Of Primary Site	68
Black	Male	2004	Unknown	IV	T2	N0	M1	None/Unknown	Yes	19	Dead	No Surgery Of Primary Site	70
Other (American Indian/AK Native, Asian/Pacific Islander)	Male	2004	Poorly differentiated; Grade III	IA	T1	N0	M0	None/Unknown	No/Unknown	122	Dead	Lobectomy/Bilobectomy	77
White	Male	2004	Poorly differentiated; Grade III	IA	T1	N0	M0	None/Unknown	Yes	123	Alive	Lobectomy/Bilobectomy	68
White	Male	2004	Unknown	IV	T1	N2	M1	Beam radiation	No/Unknown	2	Dead	No Surgery Of Primary Site	70
White	Male	2004	Unknown	IA	T1	N0	M0	Beam radiation	No/Unknown	21	Dead	No Surgery Of Primary Site	78
White	Male	2004	Poorly differentiated; Grade III	IB	T2	N0	M0	None/Unknown	No/Unknown	46	Dead	Complete/Total/Standard Pneumonectomy; Pneumonectomy, Nos	82
White	Male	2004	Moderately differentiated; Grade II	IV	T4	N0	M1	Beam radiation	No/Unknown	11	Dead	No Surgery Of Primary Site	71
White	Female	2004	Moderately differentiated; Grade II	IIB	T2	N1	M0	None/Unknown	Yes	136	Alive	Lobectomy/Bilobectomy	77
White	Female	2004	Moderately differentiated; Grade II	IA	T1	N0	M0	None/Unknown	No/Unknown	14	Dead	Lobectomy/Bilobectomy	66
White	Female	2004	Unknown	IV	T1	N2	M1	None/Unknown	No/Unknown	9	Dead	No Surgery Of Primary Site	63
White	Male	2004	Unknown	IV	T2	N2	M1	Beam radiation	Yes	3	Dead	No Surgery Of Primary Site	55
White	Male	2004	Poorly differentiated; Grade III	IIIA	T1	N2	M0	Beam radiation	Yes	35	Dead	No Surgery Of Primary Site	60
Black	Male	2004	Poorly differentiated; Grade III	IA	T1	N0	M0	None/Unknown	No/Unknown	137	Alive	Lobectomy/Bilobectomy	58
White	Male	2004	Unknown	IA	T1	N0	M0	Beam radiation	No/Unknown	15	Dead	No Surgery Of Primary Site	75
White	Male	2004	Poorly differentiated; Grade III	IB	T2	N0	M0	Beam radiation	Yes	139	Alive	Lobectomy/Bilobectomy	77
Black	Female	2004	Unknown	IA	T1	N0	M0	None/Unknown	No/Unknown	11	Dead	Lobectomy/Bilobectomy	66
White	Male	2004	Moderately differentiated; Grade II	IIIA	T2	N2	M0	None/Unknown	No/Unknown	19	Dead	No Surgery Of Primary Site	61
White	Male	2004	Poorly differentiated; Grade III	IA	T1	N0	M0	None/Unknown	No/Unknown	0	Dead	Lobectomy/Bilobectomy	79
White	Male	2004	Unknown	IV	T3	N2	M1	None/Unknown	Yes	12	Dead	No Surgery Of Primary Site	48
Black	Female	2004	Unknown	IA	T1	N0	M0	None/Unknown	No/Unknown	42	Dead	No Surgery Of Primary Site	72
Black	Female	2004	Poorly differentiated; Grade III	IIIB	T4	N2	M0	Beam radiation	Yes	11	Dead	No Surgery Of Primary Site	62
White	Male	2004	Unknown	IV	T2	N2	M1	None/Unknown	No/Unknown	1	Dead	No Surgery Of Primary Site	77
White	Male	2004	Poorly differentiated; Grade III	IIIA	T1	N2	M0	None/Unknown	No/Unknown	4	Dead	Lobectomy/Bilobectomy	84
White	Male	2004	Unknown	IA	T1	N0	M0	None/Unknown	No/Unknown	6	Dead	No Surgery Of Primary Site	74
White	Female	2004	Moderately differentiated; Grade II	IB	T2	N0	M0	None/Unknown	No/Unknown	59	Dead	Partial/Wedge/Segmental Resec., Lingulectomy, Partial Lobectomy, Sleeve Resec.	81
White	Male	2004	Poorly differentiated; Grade III	IIIA	T1	N2	M0	Beam radiation	No/Unknown	5	Dead	No Surgery Of Primary Site	85
White	Female	2004	Moderately differentiated; Grade II	IV	T4	N0	M1	None/Unknown	Yes	5	Dead	Partial/Wedge/Segmental Resec., Lingulectomy, Partial Lobectomy, Sleeve Resec.	75
White	Male	2004	Unknown	IV	T4	N3	M1	None/Unknown	Yes	33	Dead	No Surgery Of Primary Site	57
White	Male	2004	Poorly differentiated; Grade III	IA	T1	N0	M0	Beam radiation	No/Unknown	15	Dead	No Surgery Of Primary Site	64
Black	Female	2004	Unknown	IA	T1	N0	M0	None/Unknown	No/Unknown	21	Dead	No Surgery Of Primary Site	77
White	Male	2004	Poorly differentiated; Grade III	IA	T1	N0	M0	None/Unknown	No/Unknown	18	Dead	Lobectomy/Bilobectomy	78
White	Female	2004	Moderately differentiated; Grade II	IIIB	T4	N0	M0	Beam radiation	No/Unknown	15	Dead	No Surgery Of Primary Site	78
White	Male	2004	Unknown	IB	T2	N0	M0	None/Unknown	Yes	134	Dead	Partial/Wedge/Segmental Resec., Lingulectomy, Partial Lobectomy, Sleeve Resec.	54
White	Male	2004	Moderately differentiated; Grade II	IIB	T2	N1	M0	None/Unknown	No/Unknown	73	Dead	Lobectomy/Bilobectomy	75
White	Female	2004	Poorly differentiated; Grade III	IV	T1	N0	M1	None/Unknown	No/Unknown	121	Dead	Partial/Wedge/Segmental Resec., Lingulectomy, Partial Lobectomy, Sleeve Resec.	81
White	Male	2004	Poorly differentiated; Grade III	IIB	T2	N1	M0	None/Unknown	Yes	134	Alive	Lobectomy/Bilobectomy	60
White	Female	2004	Poorly differentiated; Grade III	IIIA	T1	N2	M0	None/Unknown	Yes	17	Dead	No Surgery Of Primary Site	62
White	Male	2004	Poorly differentiated; Grade III	IA	T1	N0	M0	None/Unknown	No/Unknown	135	Alive	Lobectomy/Bilobectomy	59
White	Male	2004	Unknown	IA	T1	N0	M0	None/Unknown	No/Unknown	139	Alive	Lobectomy/Bilobectomy	71
Black	Male	2004	Poorly differentiated; Grade III	IA	T1	N0	M0	None/Unknown	No/Unknown	78	Dead	Lobectomy/Bilobectomy	75
White	Male	2004	Poorly differentiated; Grade III	IA	T1	N0	M0	Beam radiation	Yes	65	Dead	No Surgery Of Primary Site	59
White	Male	2004	Moderately differentiated; Grade II	IIIA	T1	N2	M0	None/Unknown	No/Unknown	2	Dead	Lobectomy/Bilobectomy	66
White	Female	2004	Poorly differentiated; Grade III	IB	T2	N0	M0	Beam radiation	No/Unknown	25	Dead	No Surgery Of Primary Site	77
White	Female	2004	Unknown	IA	T1	N0	M0	None/Unknown	No/Unknown	37	Dead	No Surgery Of Primary Site	79
White	Male	2004	Moderately differentiated; Grade II	IA	T1	N0	M0	Beam radiation	No/Unknown	25	Dead	No Surgery Of Primary Site	55
White	Female	2004	Moderately differentiated; Grade II	IIIA	T2	N2	M0	Beam radiation	Yes	26	Dead	No Surgery Of Primary Site	75
Black	Male	2004	Moderately differentiated; Grade II	IA	T1	N0	M0	None/Unknown	No/Unknown	17	Dead	Lobectomy/Bilobectomy	82
White	Female	2004	Unknown	IV	T4	N2	M1	Beam radiation	Yes	3	Dead	No Surgery Of Primary Site	62
White	Male	2004	Poorly differentiated; Grade III	IV	T4	N0	M1	Beam radiation	No/Unknown	9	Dead	No Surgery Of Primary Site	70
White	Female	2004	Moderately differentiated; Grade II	IV	T4	N0	M1	Beam radiation	No/Unknown	3	Dead	No Surgery Of Primary Site	61
Black	Female	2004	Unknown	IIIA	T2	N2	M0	Beam radiation	Yes	21	Dead	No Surgery Of Primary Site	79
White	Male	2004	Poorly differentiated; Grade III	IIIA	T1	N2	M0	Beam radiation	Yes	138	Alive	Lobectomy/Bilobectomy	72
White	Male	2004	Moderately differentiated; Grade II	IA	T1	N0	M0	None/Unknown	Yes	49	Dead	Partial/Wedge/Segmental Resec., Lingulectomy, Partial Lobectomy, Sleeve Resec.	76
Black	Female	2004	Poorly differentiated; Grade III	IIA	T1	N1	M0	Beam radiation	Yes	85	Dead	Lobectomy/Bilobectomy	55
Black	Female	2004	Unknown	IIIB	T1	N3	M0	None/Unknown	No/Unknown	26	Dead	No Surgery Of Primary Site	76
Other (American Indian/AK Native, Asian/Pacific Islander)	Female	2004	Poorly differentiated; Grade III	IB	T2	N0	M0	None/Unknown	No/Unknown	88	Dead	Radical Pneumonectomy (Complete Pneumonectomy Plus Dissection Of Mediastinal LN)	69
Other (American Indian/AK Native, Asian/Pacific Islander)	Female	2004	Moderately differentiated; Grade II	IA	T1	N0	M0	None/Unknown	No/Unknown	113	Dead	Lobectomy/Bilobectomy	67
White	Male	2004	Moderately differentiated; Grade II	IIIA	T2	N2	M0	None/Unknown	No/Unknown	8	Dead	No Surgery Of Primary Site	87
White	Male	2004	Poorly differentiated; Grade III	IA	T1	N0	M0	None/Unknown	No/Unknown	140	Alive	Lobectomy/Bilobectomy	75
White	Female	2004	Moderately differentiated; Grade II	IA	T1	N0	M0	None/Unknown	No/Unknown	45	Dead	Lobectomy/Bilobectomy	61
White	Male	2004	Poorly differentiated; Grade III	IV	T4	N2	M1	Beam radiation	Yes	3	Dead	No Surgery Of Primary Site	76
White	Female	2004	Poorly differentiated; Grade III	IA	T1	N0	M0	None/Unknown	No/Unknown	37	Dead	Partial/Wedge/Segmental Resec., Lingulectomy, Partial Lobectomy, Sleeve Resec.	67
White	Male	2004	Moderately differentiated; Grade II	IA	T1	N0	M0	None/Unknown	No/Unknown	140	Alive	Lobectomy/Bilobectomy	65
White	Male	2004	Unknown	IA	T1	N0	M0	Beam radiation	No/Unknown	9	Dead	No Surgery Of Primary Site	78
White	Male	2004	Unknown	IA	T1	N0	M0	Beam radiation	No/Unknown	6	Dead	No Surgery Of Primary Site	73
White	Male	2004	Undifferentiated; anaplastic; Grade IV	IV	T2	N2	M1	Beam radiation	Yes	18	Dead	No Surgery Of Primary Site	62
White	Female	2004	Moderately differentiated; Grade II	IIB	T2	N1	M0	None/Unknown	No/Unknown	33	Dead	Lobectomy/Bilobectomy	60
White	Male	2004	Moderately differentiated; Grade II	IA	T1	N0	M0	None/Unknown	No/Unknown	81	Dead	Lobectomy/Bilobectomy	68
White	Female	2004	Poorly differentiated; Grade III	IIIB	T4	N2	M0	None/Unknown	No/Unknown	1	Dead	No Surgery Of Primary Site	78
White	Female	2004	Poorly differentiated; Grade III	IA	T1	N0	M0	None/Unknown	No/Unknown	142	Alive	Lobectomy/Bilobectomy	70
White	Female	2004	Unknown	IV	T1	N2	M1	Beam radiation	Yes	32	Dead	No Surgery Of Primary Site	73
White	Female	2004	Poorly differentiated; Grade III	IA	T1	N0	M0	None/Unknown	No/Unknown	134	Alive	Lobectomy/Bilobectomy	67
White	Male	2004	Poorly differentiated; Grade III	IA	T1	N0	M0	None/Unknown	No/Unknown	44	Dead	Lobectomy/Bilobectomy	73
White	Male	2004	Unknown	IA	T1	N0	M0	Beam radiation	No/Unknown	30	Dead	No Surgery Of Primary Site	71
White	Female	2004	Poorly differentiated; Grade III	IA	T1	N0	M0	None/Unknown	No/Unknown	57	Dead	Lobectomy/Bilobectomy	64
White	Female	2004	Unknown	IV	T1	N2	M1	None/Unknown	Yes	13	Dead	No Surgery Of Primary Site	67
White	Male	2004	Moderately differentiated; Grade II	IA	T1	N0	M0	None/Unknown	No/Unknown	141	Alive	Lobectomy/Bilobectomy	65
White	Female	2004	Moderately differentiated; Grade II	IIIB	T4	N0	M0	None/Unknown	No/Unknown	0	Dead	Lobectomy/Bilobectomy	71
White	Female	2004	Poorly differentiated; Grade III	IA	T1	N0	M0	None/Unknown	No/Unknown	32	Dead	Lobectomy/Bilobectomy	71
White	Male	2004	Unknown	IIIA	T2	N2	M0	Beam radiation	Yes	45	Dead	Lobectomy/Bilobectomy	66
Black	Female	2004	Poorly differentiated; Grade III	IIA	T1	N1	M0	None/Unknown	No/Unknown	138	Alive	Lobectomy/Bilobectomy	74
White	Male	2004	Poorly differentiated; Grade III	IB	T2	N0	M0	Beam radiation	No/Unknown	7	Dead	No Surgery Of Primary Site	87
White	Female	2004	Poorly differentiated; Grade III	IV	T1	N2	M1	None/Unknown	Yes	13	Dead	No Surgery Of Primary Site	75
White	Female	2004	Poorly differentiated; Grade III	IA	T1	N0	M0	None/Unknown	Yes	141	Alive	Lobectomy/Bilobectomy	47
White	Male	2004	Moderately differentiated; Grade II	IA	T1	N0	M0	None/Unknown	No/Unknown	29	Dead	No Surgery Of Primary Site	76
White	Male	2004	Moderately differentiated; Grade II	IIIA	T1	N2	M0	Beam radiation	Yes	135	Alive	Lobectomy/Bilobectomy	55
White	Female	2004	Moderately differentiated; Grade II	IA	T1	N0	M0	None/Unknown	No/Unknown	102	Dead	Lobectomy/Bilobectomy	66
White	Female	2004	Poorly differentiated; Grade III	IA	T1	N0	M0	None/Unknown	No/Unknown	132	Alive	Lobectomy/Bilobectomy	69
White	Male	2004	Poorly differentiated; Grade III	IA	T1	N0	M0	None/Unknown	No/Unknown	110	Dead	Lobectomy/Bilobectomy	76
White	Male	2004	Moderately differentiated; Grade II	IIIA	T1	N2	M0	None/Unknown	Yes	37	Dead	No Surgery Of Primary Site	72
White	Male	2004	Moderately differentiated; Grade II	IA	T1	N0	M0	None/Unknown	No/Unknown	143	Alive	Lobectomy/Bilobectomy	69
White	Female	2004	Poorly differentiated; Grade III	IA	T1	N0	M0	None/Unknown	No/Unknown	38	Dead	Partial/Wedge/Segmental Resec., Lingulectomy, Partial Lobectomy, Sleeve Resec.	70
Black	Female	2004	Moderately differentiated; Grade II	IV	T1	N0	M1	None/Unknown	No/Unknown	30	Dead	Partial/Wedge/Segmental Resec., Lingulectomy, Partial Lobectomy, Sleeve Resec.	63
White	Female	2004	Poorly differentiated; Grade III	IA	T1	N0	M0	None/Unknown	No/Unknown	132	Alive	Partial/Wedge/Segmental Resec., Lingulectomy, Partial Lobectomy, Sleeve Resec.	79
Black	Male	2004	Moderately differentiated; Grade II	IV	T1	N0	M1	None/Unknown	No/Unknown	86	Dead	Partial/Wedge/Segmental Resec., Lingulectomy, Partial Lobectomy, Sleeve Resec.	40
White	Female	2004	Poorly differentiated; Grade III	IA	T1	N0	M0	None/Unknown	No/Unknown	98	Dead	Lobectomy/Bilobectomy	78
White	Male	2004	Moderately differentiated; Grade II	IA	T1	N0	M0	None/Unknown	Yes	85	Dead	Lobectomy/Bilobectomy	70
White	Male	2004	Moderately differentiated; Grade II	IA	T1	N0	M0	None/Unknown	No/Unknown	16	Dead	No Surgery Of Primary Site	66
Black	Male	2004	Poorly differentiated; Grade III	IIA	T1	N1	M0	Beam radiation	No/Unknown	11	Dead	Partial/Wedge/Segmental Resec., Lingulectomy, Partial Lobectomy, Sleeve Resec.	80
White	Male	2004	Unknown	IA	T1	N0	M0	None/Unknown	No/Unknown	12	Dead	No Surgery Of Primary Site	81
White	Female	2004	Undifferentiated; anaplastic; Grade IV	IA	T1	N0	M0	None/Unknown	No/Unknown	121	Dead	Lobectomy/Bilobectomy	73
Black	Male	2004	Moderately differentiated; Grade II	IA	T1	N0	M0	None/Unknown	No/Unknown	113	Dead	Lobectomy/Bilobectomy	75
White	Female	2004	Unknown	IIIB	T4	N2	M0	None/Unknown	No/Unknown	10	Dead	No Surgery Of Primary Site	72
White	Male	2004	Poorly differentiated; Grade III	IB	T2	N0	M0	None/Unknown	Yes	79	Dead	Lobectomy/Bilobectomy	74
White	Female	2004	Unknown	IV	T1	N3	M1	Beam radiation	Yes	27	Dead	No Surgery Of Primary Site	63
Black	Male	2004	Poorly differentiated; Grade III	IIIB	T4	N0	M0	Beam radiation	Yes	63	Dead	No Surgery Of Primary Site	65
White	Female	2004	Undifferentiated; anaplastic; Grade IV	IA	T1	N0	M0	None/Unknown	No/Unknown	77	Dead	Partial/Wedge/Segmental Resec., Lingulectomy, Partial Lobectomy, Sleeve Resec.	79
White	Male	2004	Poorly differentiated; Grade III	IA	T1	N0	M0	None/Unknown	No/Unknown	121	Dead	Lobectomy/Bilobectomy	74
White	Male	2004	Unknown	IV	T4	N0	M1	Beam radiation	No/Unknown	6	Dead	No Surgery Of Primary Site	64
White	Female	2004	Poorly differentiated; Grade III	IA	T1	N0	M0	None/Unknown	No/Unknown	36	Dead	Local Surgical Excision Or Destruction Of Lesion	78
White	Male	2004	Moderately differentiated; Grade II	IA	T1	N0	M0	None/Unknown	No/Unknown	36	Dead	Lobectomy/Bilobectomy	67
White	Male	2004	Well differentiated; Grade I	IIB	T2	N1	M0	None/Unknown	No/Unknown	52	Dead	Radical Pneumonectomy (Complete Pneumonectomy Plus Dissection Of Mediastinal LN)	80
Black	Female	2004	Poorly differentiated; Grade III	IIIA	T2	N2	M0	None/Unknown	Yes	20	Dead	Lobectomy/Bilobectomy	56
White	Female	2004	Unknown	IIIB	T1	N3	M0	Beam radiation	No/Unknown	20	Dead	No Surgery Of Primary Site	79
White	Female	2004	Moderately differentiated; Grade II	IIIB	T4	N1	M0	None/Unknown	No/Unknown	42	Dead	Lobectomy/Bilobectomy	71
White	Male	2004	Moderately differentiated; Grade II	IIIB	T1	N3	M0	None/Unknown	No/Unknown	3	Dead	No Surgery Of Primary Site	70
White	Male	2004	Poorly differentiated; Grade III	IA	T1	N0	M0	None/Unknown	No/Unknown	32	Dead	Lobectomy/Bilobectomy	74
White	Female	2004	Poorly differentiated; Grade III	IIIA	T1	N2	M0	None/Unknown	No/Unknown	82	Dead	Partial/Wedge/Segmental Resec., Lingulectomy, Partial Lobectomy, Sleeve Resec.	57
White	Male	2004	Poorly differentiated; Grade III	IA	T1	N0	M0	None/Unknown	No/Unknown	12	Dead	No Surgery Of Primary Site	73
White	Male	2004	Moderately differentiated; Grade II	IIB	T3	N0	M0	None/Unknown	No/Unknown	35	Dead	Complete/Total/Standard Pneumonectomy; Pneumonectomy, Nos	45
White	Male	2004	Poorly differentiated; Grade III	IIIB	T4	N2	M0	Beam radiation	Yes	6	Dead	No Surgery Of Primary Site	58
White	Female	2004	Unknown	IA	T1	N0	M0	None/Unknown	No/Unknown	44	Dead	Lobectomy/Bilobectomy	84
White	Male	2004	Unknown	IB	T2	N0	M0	None/Unknown	No/Unknown	1	Dead	No Surgery Of Primary Site	81
White	Male	2004	Moderately differentiated; Grade II	IV	T3	N2	M1	None/Unknown	No/Unknown	0	Dead	No Surgery Of Primary Site	70
White	Male	2004	Moderately differentiated; Grade II	IIIA	T1	N2	M0	Beam radiation	Yes	23	Dead	Lobectomy/Bilobectomy	80
White	Male	2004	Unknown	IA	T1	N0	M0	Beam radiation	No/Unknown	9	Dead	No Surgery Of Primary Site	68
White	Male	2004	Unknown	IIB	T3	N0	M0	None/Unknown	No/Unknown	12	Dead	No Surgery Of Primary Site	81
White	Male	2004	Moderately differentiated; Grade II	IA	T1	N0	M0	None/Unknown	No/Unknown	7	Dead	Lobectomy/Bilobectomy	63
White	Female	2004	Poorly differentiated; Grade III	IIA	T1	N1	M0	None/Unknown	No/Unknown	142	Alive	Lobectomy/Bilobectomy	74
White	Male	2004	Well differentiated; Grade I	IA	T1	N0	M0	Refused	No/Unknown	28	Dead	No Surgery Of Primary Site	78
White	Female	2004	Poorly differentiated; Grade III	IA	T1	N0	M0	None/Unknown	No/Unknown	39	Dead	Lobectomy/Bilobectomy	72
White	Female	2004	Poorly differentiated; Grade III	IIIA	T1	N2	M0	Beam radiation	No/Unknown	38	Dead	No Surgery Of Primary Site	70
White	Male	2004	Unknown	IV	T1	N2	M1	None/Unknown	No/Unknown	16	Dead	No Surgery Of Primary Site	88
White	Female	2004	Poorly differentiated; Grade III	IV	T4	N3	M1	Beam radiation	Yes	1	Dead	No Surgery Of Primary Site	65
White	Female	2004	Moderately differentiated; Grade II	IA	T1	N0	M0	None/Unknown	No/Unknown	4	Dead	No Surgery Of Primary Site	86
White	Male	2004	Poorly differentiated; Grade III	IA	T1	N0	M0	None/Unknown	No/Unknown	93	Dead	Partial/Wedge/Segmental Resec., Lingulectomy, Partial Lobectomy, Sleeve Resec.	66
Other (American Indian/AK Native, Asian/Pacific Islander)	Female	2004	Unknown	IV	T1	N2	M1	None/Unknown	No/Unknown	4	Dead	No Surgery Of Primary Site	69
White	Male	2004	Moderately differentiated; Grade II	IA	T1	N0	M0	None/Unknown	Yes	10	Dead	Lobectomy/Bilobectomy	69
White	Male	2004	Moderately differentiated; Grade II	IA	T1	N0	M0	None/Unknown	No/Unknown	139	Alive	Partial/Wedge/Segmental Resec., Lingulectomy, Partial Lobectomy, Sleeve Resec.	65
Other (American Indian/AK Native, Asian/Pacific Islander)	Male	2004	Moderately differentiated; Grade II	IA	T1	N0	M0	None/Unknown	No/Unknown	143	Alive	Partial/Wedge/Segmental Resec., Lingulectomy, Partial Lobectomy, Sleeve Resec.	78
White	Female	2004	Unknown	IV	T1	N0	M1	None/Unknown	No/Unknown	1	Dead	No Surgery Of Primary Site	82
White	Female	2004	Poorly differentiated; Grade III	IA	T1	N0	M0	None/Unknown	No/Unknown	124	Alive	Lobectomy/Bilobectomy	76
White	Male	2004	Moderately differentiated; Grade II	IB	T2	N0	M0	None/Unknown	No/Unknown	20	Dead	Lobectomy/Bilobectomy	65
White	Male	2004	Moderately differentiated; Grade II	IV	T2	N0	M1	Beam radiation	Yes	1	Dead	No Surgery Of Primary Site	80
White	Male	2004	Moderately differentiated; Grade II	IIA	T1	N1	M0	None/Unknown	No/Unknown	2	Dead	No Surgery Of Primary Site	76
White	Female	2004	Poorly differentiated; Grade III	IA	T1	N0	M0	None/Unknown	No/Unknown	1	Dead	Lobectomy/Bilobectomy	67
White	Female	2004	Poorly differentiated; Grade III	IA	T1	N0	M0	None/Unknown	No/Unknown	115	Alive	Lobectomy/Bilobectomy	80
White	Female	2004	Unknown	IA	T1	N0	M0	None/Unknown	No/Unknown	115	Alive	No Surgery Of Primary Site	80
White	Female	2004	Poorly differentiated; Grade III	IA	T1	N0	M0	Beam radiation	No/Unknown	22	Dead	Local Surgical Excision Or Destruction Of Lesion	61
White	Male	2004	Poorly differentiated; Grade III	IA	T1	N0	M0	None/Unknown	No/Unknown	137	Alive	Lobectomy/Bilobectomy	67
Other (American Indian/AK Native, Asian/Pacific Islander)	Male	2004	Moderately differentiated; Grade II	IIA	T1	N1	M0	None/Unknown	No/Unknown	14	Dead	Lobectomy/Bilobectomy	73
Other (American Indian/AK Native, Asian/Pacific Islander)	Male	2004	Moderately differentiated; Grade II	IA	T1	N0	M0	None/Unknown	No/Unknown	133	Alive	Lobectomy/Bilobectomy	67
White	Female	2004	Unknown	IIIB	T4	N0	M0	None/Unknown	No/Unknown	7	Dead	No Surgery Of Primary Site	74
White	Female	2004	Poorly differentiated; Grade III	IA	T1	N0	M0	None/Unknown	No/Unknown	65	Dead	Partial/Wedge/Segmental Resec., Lingulectomy, Partial Lobectomy, Sleeve Resec.	74
White	Male	2004	Poorly differentiated; Grade III	IA	T1	N0	M0	None/Unknown	No/Unknown	133	Alive	Lobectomy/Bilobectomy	60
Black	Female	2004	Poorly differentiated; Grade III	IIB	T3	N0	M0	Beam radiation	No/Unknown	13	Dead	Radical Pneumonectomy (Complete Pneumonectomy Plus Dissection Of Mediastinal LN)	56
White	Female	2004	Unknown	IA	T1	N0	M0	None/Unknown	No/Unknown	137	Alive	Partial/Wedge/Segmental Resec., Lingulectomy, Partial Lobectomy, Sleeve Resec.	49
White	Male	2004	Moderately differentiated; Grade II	IIIB	T4	N0	M0	Beam radiation	Yes	26	Dead	No Surgery Of Primary Site	70
White	Female	2004	Poorly differentiated; Grade III	IA	T1	N0	M0	None/Unknown	No/Unknown	136	Alive	Partial/Wedge/Segmental Resec., Lingulectomy, Partial Lobectomy, Sleeve Resec.	69
White	Female	2004	Poorly differentiated; Grade III	IA	T1	N0	M0	None/Unknown	No/Unknown	129	Dead	Local Surgical Excision Or Destruction Of Lesion	76
White	Female	2004	Unknown	IIIB	T4	N3	M0	Beam radiation	No/Unknown	0	Dead	No Surgery Of Primary Site	75
White	Male	2004	Poorly differentiated; Grade III	IV	T1	N0	M1	None/Unknown	No/Unknown	35	Dead	Partial/Wedge/Segmental Resec., Lingulectomy, Partial Lobectomy, Sleeve Resec.	72
White	Female	2004	Unknown	IIIA	T1	N2	M0	Beam radiation	Yes	26	Dead	No Surgery Of Primary Site	73
White	Female	2004	Unknown	IA	T1	N0	M0	Beam radiation	No/Unknown	48	Dead	No Surgery Of Primary Site	57
White	Female	2004	Unknown	IA	T1	N0	M0	Beam radiation	Yes	13	Dead	No Surgery Of Primary Site	65
White	Male	2004	Poorly differentiated; Grade III	IA	T1	N0	M0	None/Unknown	No/Unknown	60	Dead	Lobectomy/Bilobectomy	69
White	Female	2004	Poorly differentiated; Grade III	IA	T1	N0	M0	None/Unknown	No/Unknown	17	Dead	Partial/Wedge/Segmental Resec., Lingulectomy, Partial Lobectomy, Sleeve Resec.	62
White	Female	2004	Poorly differentiated; Grade III	IA	T1	N0	M0	None/Unknown	Yes	138	Alive	Lobectomy/Bilobectomy	69
White	Female	2004	Moderately differentiated; Grade II	IV	T4	N2	M1	Refused	No/Unknown	2	Dead	No Surgery Of Primary Site	76
White	Male	2004	Moderately differentiated; Grade II	IA	T1	N0	M0	None/Unknown	No/Unknown	25	Dead	Partial/Wedge/Segmental Resec., Lingulectomy, Partial Lobectomy, Sleeve Resec.	71
White	Female	2004	Unknown	IIIB	T4	N3	M0	None/Unknown	Yes	24	Dead	No Surgery Of Primary Site	52
White	Male	2004	Poorly differentiated; Grade III	IA	T1	N0	M0	None/Unknown	No/Unknown	50	Dead	Lobectomy/Bilobectomy	66
White	Male	2004	Well differentiated; Grade I	IA	T1	N0	M0	None/Unknown	No/Unknown	46	Dead	Lobectomy/Bilobectomy	73
Black	Female	2004	Moderately differentiated; Grade II	IA	T1	N0	M0	None/Unknown	No/Unknown	142	Alive	Partial/Wedge/Segmental Resec., Lingulectomy, Partial Lobectomy, Sleeve Resec.	79
White	Female	2004	Poorly differentiated; Grade III	IIIA	T1	N2	M0	None/Unknown	No/Unknown	16	Dead	No Surgery Of Primary Site	78
White	Female	2004	Poorly differentiated; Grade III	IA	T1	N0	M0	None/Unknown	No/Unknown	102	Dead	Lobectomy/Bilobectomy	62
White	Female	2004	Moderately differentiated; Grade II	IA	T1	N0	M0	Beam radiation	Yes	3	Dead	No Surgery Of Primary Site	59
White	Male	2004	Unknown	IIIB	T4	N0	M0	None/Unknown	No/Unknown	1	Dead	No Surgery Of Primary Site	62
White	Female	2004	Undifferentiated; anaplastic; Grade IV	IIA	T1	N1	M0	Refused	No/Unknown	63	Dead	Lobectomy/Bilobectomy	79
White	Male	2004	Moderately differentiated; Grade II	IA	T1	N0	M0	None/Unknown	No/Unknown	133	Alive	Lobectomy/Bilobectomy	65
White	Male	2004	Moderately differentiated; Grade II	IA	T1	N0	M0	Beam radiation	No/Unknown	122	Dead	Lobectomy/Bilobectomy	65
White	Male	2004	Unknown	IV	T1	N0	M1	None/Unknown	No/Unknown	42	Dead	Lobectomy/Bilobectomy	61
White	Female	2004	Unknown	IIIB	T1	N3	M0	Beam radiation	No/Unknown	2	Dead	No Surgery Of Primary Site	63
White	Female	2004	Unknown	IA	T1	N0	M0	Beam radiation	No/Unknown	14	Dead	No Surgery Of Primary Site	78
White	Male	2004	Unknown	IA	T1	N0	M0	None/Unknown	No/Unknown	21	Dead	No Surgery Of Primary Site	58
White	Female	2004	Poorly differentiated; Grade III	IIIA	T1	N2	M0	Beam radiation	Yes	14	Dead	No Surgery Of Primary Site	40
White	Female	2004	Poorly differentiated; Grade III	IA	T1	N0	M0	None/Unknown	No/Unknown	92	Dead	Lobectomy/Bilobectomy	70
White	Male	2004	Poorly differentiated; Grade III	IV	T2	N1	M1	Refused	No/Unknown	0	Dead	No Surgery Of Primary Site	62
White	Female	2004	Moderately differentiated; Grade II	IA	T1	N0	M0	None/Unknown	No/Unknown	99	Dead	Lobectomy/Bilobectomy	64
White	Male	2004	Poorly differentiated; Grade III	IV	T1	N2	M1	None/Unknown	No/Unknown	3	Dead	No Surgery Of Primary Site	65
White	Male	2004	Unknown	IA	T1	N0	M0	Beam radiation	No/Unknown	35	Dead	No Surgery Of Primary Site	64
Black	Male	2004	Poorly differentiated; Grade III	IIIA	T2	N2	M0	Beam radiation	No/Unknown	4	Dead	No Surgery Of Primary Site	65
White	Male	2004	Moderately differentiated; Grade II	IA	T1	N0	M0	None/Unknown	No/Unknown	103	Dead	Lobectomy/Bilobectomy	74
White	Female	2004	Well differentiated; Grade I	IA	T1	N0	M0	None/Unknown	No/Unknown	103	Dead	Lobectomy/Bilobectomy	72
White	Female	2004	Poorly differentiated; Grade III	IB	T2	N0	M0	None/Unknown	No/Unknown	104	Dead	Lobectomy/Bilobectomy	74
White	Female	2004	Poorly differentiated; Grade III	IA	T1	N0	M0	None/Unknown	No/Unknown	11	Dead	No Surgery Of Primary Site	77
Black	Male	2004	Moderately differentiated; Grade II	IIIB	T4	N2	M0	None/Unknown	No/Unknown	11	Dead	Lobectomy/Bilobectomy	61
White	Female	2004	Poorly differentiated; Grade III	IA	T1	N0	M0	None/Unknown	No/Unknown	59	Dead	Lobectomy/Bilobectomy	62
White	Female	2004	Moderately differentiated; Grade II	IA	T1	N0	M0	None/Unknown	No/Unknown	137	Alive	Partial/Wedge/Segmental Resec., Lingulectomy, Partial Lobectomy, Sleeve Resec.	75
White	Female	2004	Unknown	IA	T1	N0	M0	Beam radiation	No/Unknown	26	Dead	No Surgery Of Primary Site	77
Black	Male	2004	Moderately differentiated; Grade II	IA	T1	N0	M0	None/Unknown	No/Unknown	140	Alive	Lobectomy/Bilobectomy	73
White	Male	2004	Unknown	IIIB	T4	N0	M0	None/Unknown	Yes	4	Dead	No Surgery Of Primary Site	74
Black	Male	2004	Unknown	IIIB	T4	N2	M0	None/Unknown	No/Unknown	10	Dead	No Surgery Of Primary Site	68
White	Male	2004	Poorly differentiated; Grade III	IIIB	T4	N2	M0	None/Unknown	No/Unknown	9	Dead	No Surgery Of Primary Site	50
White	Female	2004	Unknown	IA	T1	N0	M0	None/Unknown	No/Unknown	6	Dead	No Surgery Of Primary Site	75
Black	Male	2004	Moderately differentiated; Grade II	IIIB	T1	N3	M0	Beam radiation	No/Unknown	12	Dead	No Surgery Of Primary Site	79
White	Male	2004	Moderately differentiated; Grade II	IIIA	T1	N2	M0	None/Unknown	No/Unknown	0	Dead	No Surgery Of Primary Site	81
Black	Male	2004	Unknown	IV	T4	N0	M1	Beam radiation	No/Unknown	40	Dead	No Surgery Of Primary Site	73
White	Male	2004	Moderately differentiated; Grade II	IB	T2	N0	M0	None/Unknown	No/Unknown	134	Alive	Lobectomy/Bilobectomy	61
White	Male	2004	Unknown	IA	T1	N0	M0	Beam radiation	No/Unknown	2	Dead	No Surgery Of Primary Site	78
White	Female	2004	Poorly differentiated; Grade III	IA	T1	N0	M0	None/Unknown	No/Unknown	72	Dead	Lobectomy/Bilobectomy	80
White	Male	2004	Poorly differentiated; Grade III	IA	T1	N0	M0	None/Unknown	No/Unknown	16	Dead	Partial/Wedge/Segmental Resec., Lingulectomy, Partial Lobectomy, Sleeve Resec.	73
White	Male	2004	Poorly differentiated; Grade III	IIB	T3	N0	M0	Beam radiation	Yes	27	Dead	Partial/Wedge/Segmental Resec., Lingulectomy, Partial Lobectomy, Sleeve Resec.	75
White	Female	2004	Moderately differentiated; Grade II	IA	T1	N0	M0	None/Unknown	No/Unknown	90	Dead	Lobectomy/Bilobectomy	72
White	Female	2004	Poorly differentiated; Grade III	IA	T1	N0	M0	None/Unknown	No/Unknown	8	Dead	Partial/Wedge/Segmental Resec., Lingulectomy, Partial Lobectomy, Sleeve Resec.	80
White	Female	2004	Poorly differentiated; Grade III	IA	T1	N0	M0	None/Unknown	No/Unknown	38	Dead	No Surgery Of Primary Site	80
White	Male	2004	Moderately differentiated; Grade II	IA	T1	N0	M0	None/Unknown	No/Unknown	36	Dead	Lobectomy/Bilobectomy	75
White	Male	2004	Poorly differentiated; Grade III	IIIB	T4	N2	M0	None/Unknown	Yes	5	Dead	No Surgery Of Primary Site	79
White	Male	2004	Moderately differentiated; Grade II	IA	T1	N0	M0	None/Unknown	No/Unknown	12	Dead	No Surgery Of Primary Site	84
Black	Female	2004	Moderately differentiated; Grade II	IA	T1	N0	M0	None/Unknown	No/Unknown	134	Alive	Partial/Wedge/Segmental Resec., Lingulectomy, Partial Lobectomy, Sleeve Resec.	40
White	Female	2004	Unknown	IA	T1	N0	M0	Beam radiation	Yes	50	Dead	No Surgery Of Primary Site	68
White	Female	2004	Poorly differentiated; Grade III	IV	T4	N0	M1	None/Unknown	No/Unknown	2	Dead	No Surgery Of Primary Site	72
White	Male	2004	Moderately differentiated; Grade II	IB	T2	N0	M0	None/Unknown	No/Unknown	9	Dead	Partial/Wedge/Segmental Resec., Lingulectomy, Partial Lobectomy, Sleeve Resec.	84
Black	Female	2004	Poorly differentiated; Grade III	IA	T1	N0	M0	None/Unknown	No/Unknown	51	Dead	Lobectomy/Bilobectomy	71
White	Male	2004	Moderately differentiated; Grade II	IB	T2	N0	M0	None/Unknown	No/Unknown	1	Dead	Partial/Wedge/Segmental Resec., Lingulectomy, Partial Lobectomy, Sleeve Resec.	82
White	Male	2004	Moderately differentiated; Grade II	IA	T1	N0	M0	None/Unknown	No/Unknown	92	Dead	No Surgery Of Primary Site	88
White	Male	2004	Poorly differentiated; Grade III	IA	T1	N0	M0	None/Unknown	No/Unknown	0	Dead	Lobectomy/Bilobectomy	80
Black	Male	2004	Moderately differentiated; Grade II	IA	T1	N0	M0	None/Unknown	No/Unknown	94	Dead	Lobectomy/Bilobectomy	75
White	Male	2004	Poorly differentiated; Grade III	IIIA	T3	N1	M0	Beam radiation	Yes	5	Dead	No Surgery Of Primary Site	60
White	Female	2004	Moderately differentiated; Grade II	IB	T2	N0	M0	None/Unknown	No/Unknown	96	Dead	Lobectomy/Bilobectomy	73
White	Male	2004	Poorly differentiated; Grade III	IIIA	T1	N2	M0	Beam radiation	Yes	56	Dead	No Surgery Of Primary Site	71
White	Male	2004	Unknown	IV	T4	N2	M1	None/Unknown	No/Unknown	7	Dead	No Surgery Of Primary Site	70
White	Female	2004	Moderately differentiated; Grade II	IB	T2	N0	M0	None/Unknown	Yes	24	Dead	Partial/Wedge/Segmental Resec., Lingulectomy, Partial Lobectomy, Sleeve Resec.	50
Black	Female	2004	Poorly differentiated; Grade III	IV	T4	N2	M1	None/Unknown	No/Unknown	0	Dead	No Surgery Of Primary Site	22
White	Female	2004	Unknown	IV	T4	N3	M1	Beam radiation	Yes	12	Dead	No Surgery Of Primary Site	61
White	Male	2004	Moderately differentiated; Grade II	IA	T1	N0	M0	None/Unknown	No/Unknown	76	Dead	Lobectomy/Bilobectomy	61
White	Male	2004	Poorly differentiated; Grade III	IA	T1	N0	M0	None/Unknown	No/Unknown	120	Dead	Partial/Wedge/Segmental Resec., Lingulectomy, Partial Lobectomy, Sleeve Resec.	80
White	Female	2004	Unknown	IIIB	T4	N0	M0	Beam radiation	No/Unknown	19	Dead	No Surgery Of Primary Site	80
White	Female	2004	Poorly differentiated; Grade III	IA	T1	N0	M0	None/Unknown	No/Unknown	133	Alive	Lobectomy/Bilobectomy	61
White	Male	2004	Moderately differentiated; Grade II	IA	T1	N0	M0	None/Unknown	No/Unknown	54	Dead	Lobectomy/Bilobectomy	75
Black	Male	2004	Moderately differentiated; Grade II	IB	T2	N0	M0	Beam radiation	Yes	37	Dead	No Surgery Of Primary Site	63
Black	Male	2004	Moderately differentiated; Grade II	IV	T4	N0	M1	Beam radiation	No/Unknown	12	Dead	No Surgery Of Primary Site	82
White	Female	2004	Moderately differentiated; Grade II	IIIA	T1	N2	M0	None/Unknown	Yes	120	Dead	No Surgery Of Primary Site	65
White	Female	2004	Moderately differentiated; Grade II	IB	T2	N0	M0	None/Unknown	No/Unknown	125	Dead	Partial/Wedge/Segmental Resec., Lingulectomy, Partial Lobectomy, Sleeve Resec.	74
White	Female	2004	Poorly differentiated; Grade III	IA	T1	N0	M0	None/Unknown	No/Unknown	143	Alive	Lobectomy/Bilobectomy	63
White	Male	2004	Moderately differentiated; Grade II	IB	T2	N0	M0	None/Unknown	No/Unknown	7	Dead	Radical Pneumonectomy (Complete Pneumonectomy Plus Dissection Of Mediastinal LN)	59
White	Female	2004	Unknown	IA	T1	N0	M0	Beam radiation	No/Unknown	60	Dead	No Surgery Of Primary Site	70
White	Male	2004	Moderately differentiated; Grade II	IB	T2	N0	M0	None/Unknown	No/Unknown	101	Dead	Partial/Wedge/Segmental Resec., Lingulectomy, Partial Lobectomy, Sleeve Resec.	74
White	Female	2004	Moderately differentiated; Grade II	IB	T2	N0	M0	None/Unknown	No/Unknown	54	Dead	Lobectomy/Bilobectomy	73
White	Male	2004	Poorly differentiated; Grade III	IA	T1	N0	M0	None/Unknown	No/Unknown	15	Dead	Lobectomy/Bilobectomy	62
White	Female	2004	Moderately differentiated; Grade II	IA	T1	N0	M0	None/Unknown	No/Unknown	39	Dead	Partial/Wedge/Segmental Resec., Lingulectomy, Partial Lobectomy, Sleeve Resec.	64
White	Male	2004	Moderately differentiated; Grade II	IIIA	T1	N2	M0	Beam radiation	Yes	32	Dead	No Surgery Of Primary Site	58
White	Male	2004	Moderately differentiated; Grade II	IV	T4	N3	M1	None/Unknown	Yes	2	Dead	No Surgery Of Primary Site	59
White	Male	2004	Unknown	IV	T4	N3	M1	Beam radiation	Yes	2	Dead	No Surgery Of Primary Site	33
White	Male	2004	Unknown	IB	T2	N0	M0	Beam radiation	No/Unknown	56	Dead	No Surgery Of Primary Site	70
White	Female	2004	Moderately differentiated; Grade II	IA	T1	N0	M0	None/Unknown	No/Unknown	104	Dead	Lobectomy/Bilobectomy	79
White	Male	2004	Undifferentiated; anaplastic; Grade IV	IV	T4	N0	M1	None/Unknown	Yes	3	Dead	No Surgery Of Primary Site	71
White	Male	2004	Moderately differentiated; Grade II	IB	T2	N0	M0	None/Unknown	No/Unknown	25	Dead	Lobectomy/Bilobectomy	63
White	Male	2004	Moderately differentiated; Grade II	IIIB	T4	N2	M0	Beam radiation	Yes	118	Alive	Lobectomy/Bilobectomy	52
White	Male	2004	Poorly differentiated; Grade III	IIB	T2	N1	M0	None/Unknown	No/Unknown	104	Dead	Complete/Total/Standard Pneumonectomy; Pneumonectomy, Nos	80
White	Female	2004	Unknown	IIIA	T1	N2	M0	None/Unknown	Yes	13	Dead	No Surgery Of Primary Site	69
White	Male	2004	Moderately differentiated; Grade II	IA	T1	N0	M0	None/Unknown	No/Unknown	126	Dead	Lobectomy/Bilobectomy	62
White	Male	2004	Unknown	IV	T4	N2	M1	Beam radiation	No/Unknown	4	Dead	No Surgery Of Primary Site	67
White	Male	2004	Moderately differentiated; Grade II	IV	T1	N0	M1	None/Unknown	No/Unknown	0	Dead	No Surgery Of Primary Site	62
Black	Male	2004	Unknown	IV	T4	N1	M1	None/Unknown	No/Unknown	2	Dead	No Surgery Of Primary Site	50
White	Female	2004	Poorly differentiated; Grade III	IA	T1	N0	M0	None/Unknown	No/Unknown	89	Dead	Lobectomy/Bilobectomy	56
White	Female	2004	Moderately differentiated; Grade II	IA	T1	N0	M0	None/Unknown	Yes	133	Alive	Partial/Wedge/Segmental Resec., Lingulectomy, Partial Lobectomy, Sleeve Resec.	66
Other (American Indian/AK Native, Asian/Pacific Islander)	Female	2004	Moderately differentiated; Grade II	IA	T1	N0	M0	None/Unknown	No/Unknown	55	Dead	Lobectomy/Bilobectomy	74
White	Male	2004	Unknown	IIIB	T1	N3	M0	Beam radiation	Yes	4	Dead	No Surgery Of Primary Site	58
White	Male	2004	Unknown	IV	T1	N0	M1	Beam radiation	No/Unknown	3	Dead	No Surgery Of Primary Site	83
White	Male	2004	Poorly differentiated; Grade III	IA	T1	N0	M0	Beam radiation	Yes	11	Dead	No Surgery Of Primary Site	90
White	Male	2004	Poorly differentiated; Grade III	IA	T1	N0	M0	None/Unknown	No/Unknown	23	Dead	Lobectomy/Bilobectomy	60
White	Male	2004	Unknown	IIIA	T1	N2	M0	Beam radiation	Yes	7	Dead	No Surgery Of Primary Site	63
White	Male	2004	Moderately differentiated; Grade II	IA	T1	N0	M0	None/Unknown	No/Unknown	18	Dead	Partial/Wedge/Segmental Resec., Lingulectomy, Partial Lobectomy, Sleeve Resec.	82
White	Male	2004	Poorly differentiated; Grade III	IA	T1	N0	M0	None/Unknown	No/Unknown	2	Dead	Partial/Wedge/Segmental Resec., Lingulectomy, Partial Lobectomy, Sleeve Resec.	82
White	Female	2004	Moderately differentiated; Grade II	IA	T1	N0	M0	None/Unknown	No/Unknown	117	Dead	Partial/Wedge/Segmental Resec., Lingulectomy, Partial Lobectomy, Sleeve Resec.	82
White	Male	2004	Poorly differentiated; Grade III	IB	T2	N0	M0	None/Unknown	No/Unknown	75	Dead	Lobectomy/Bilobectomy	79
Other (American Indian/AK Native, Asian/Pacific Islander)	Female	2004	Poorly differentiated; Grade III	IA	T1	N0	M0	None/Unknown	No/Unknown	57	Dead	Lobectomy/Bilobectomy	82
White	Female	2004	Moderately differentiated; Grade II	IA	T1	N0	M0	None/Unknown	Yes	54	Dead	No Surgery Of Primary Site	74
White	Male	2004	Unknown	IV	T1	N0	M1	None/Unknown	No/Unknown	23	Dead	No Surgery Of Primary Site	75
White	Male	2004	Poorly differentiated; Grade III	IIIA	T3	N2	M0	None/Unknown	No/Unknown	36	Dead	No Surgery Of Primary Site	73
White	Male	2004	Poorly differentiated; Grade III	IA	T1	N0	M0	None/Unknown	No/Unknown	34	Dead	No Surgery Of Primary Site	77
Other (American Indian/AK Native, Asian/Pacific Islander)	Female	2004	Unknown	IV	T1	N3	M1	None/Unknown	No/Unknown	2	Dead	No Surgery Of Primary Site	68
White	Male	2004	Poorly differentiated; Grade III	IIA	T1	N1	M0	None/Unknown	No/Unknown	120	Dead	Complete/Total/Standard Pneumonectomy; Pneumonectomy, Nos	67
White	Male	2004	Moderately differentiated; Grade II	IV	T4	N2	M1	Refused	No/Unknown	0	Dead	No Surgery Of Primary Site	64
White	Female	2004	Unknown	IIIA	T1	N2	M0	Beam radiation	Yes	28	Dead	No Surgery Of Primary Site	71
White	Male	2004	Unknown	IA	T1	N0	M0	None/Unknown	No/Unknown	135	Alive	Partial/Wedge/Segmental Resec., Lingulectomy, Partial Lobectomy, Sleeve Resec.	57
White	Male	2004	Poorly differentiated; Grade III	IIB	T2	N1	M0	None/Unknown	Yes	24	Dead	Lobectomy/Bilobectomy	74
Black	Female	2004	Poorly differentiated; Grade III	IIB	T2	N1	M0	Beam radiation	No/Unknown	4	Dead	No Surgery Of Primary Site	76
White	Female	2004	Moderately differentiated; Grade II	IA	T1	N0	M0	None/Unknown	No/Unknown	31	Dead	Lobectomy/Bilobectomy	67
White	Male	2004	Poorly differentiated; Grade III	IV	T4	N3	M1	Beam radiation	No/Unknown	2	Dead	No Surgery Of Primary Site	68
White	Female	2004	Unknown	IA	T1	N0	M0	None/Unknown	No/Unknown	0	Dead	No Surgery Of Primary Site	82
White	Male	2004	Poorly differentiated; Grade III	IA	T1	N0	M0	None/Unknown	No/Unknown	47	Dead	Lobectomy/Bilobectomy	76
White	Male	2004	Moderately differentiated; Grade II	IA	T1	N0	M0	None/Unknown	No/Unknown	24	Dead	Partial/Wedge/Segmental Resec., Lingulectomy, Partial Lobectomy, Sleeve Resec.	68
White	Male	2004	Moderately differentiated; Grade II	IIB	T2	N1	M0	None/Unknown	Yes	12	Dead	Lobectomy/Bilobectomy	73
White	Female	2004	Poorly differentiated; Grade III	IB	T2	N0	M0	None/Unknown	Yes	132	Alive	Lobectomy/Bilobectomy	59
White	Male	2004	Moderately differentiated; Grade II	IA	T1	N0	M0	Beam radiation	No/Unknown	117	Dead	Partial/Wedge/Segmental Resec., Lingulectomy, Partial Lobectomy, Sleeve Resec.	84
White	Female	2004	Moderately differentiated; Grade II	IA	T1	N0	M0	None/Unknown	No/Unknown	143	Alive	Lobectomy/Bilobectomy	75
White	Female	2004	Poorly differentiated; Grade III	IA	T1	N0	M0	None/Unknown	No/Unknown	6	Dead	Lobectomy/Bilobectomy	71
Black	Male	2004	Moderately differentiated; Grade II	IIIA	T3	N2	M0	None/Unknown	Yes	37	Dead	Lobectomy/Bilobectomy	69
White	Female	2004	Unknown	IA	T1	N0	M0	Beam radiation	Yes	20	Dead	No Surgery Of Primary Site	79
White	Male	2004	Moderately differentiated; Grade II	IA	T1	N0	M0	None/Unknown	No/Unknown	28	Dead	Lobectomy/Bilobectomy	62
Black	Male	2004	Poorly differentiated; Grade III	IA	T1	N0	M0	None/Unknown	No/Unknown	142	Alive	Lobectomy/Bilobectomy	59
White	Female	2004	Poorly differentiated; Grade III	IIIA	T1	N2	M0	Beam radiation	Yes	6	Dead	Lobectomy/Bilobectomy	71
White	Female	2004	Poorly differentiated; Grade III	IV	T4	N3	M1	Refused	No/Unknown	10	Dead	Partial/Wedge/Segmental Resec., Lingulectomy, Partial Lobectomy, Sleeve Resec.	75
White	Male	2004	Moderately differentiated; Grade II	IV	T4	N1	M1	None/Unknown	No/Unknown	13	Dead	No Surgery Of Primary Site	81
Other (American Indian/AK Native, Asian/Pacific Islander)	Male	2004	Unknown	IV	T1	N0	M1	None/Unknown	No/Unknown	13	Dead	No Surgery Of Primary Site	81
White	Female	2004	Unknown	IA	T1	N0	M0	None/Unknown	No/Unknown	15	Dead	No Surgery Of Primary Site	78
White	Female	2004	Poorly differentiated; Grade III	IB	T2	N0	M0	None/Unknown	No/Unknown	21	Dead	Lobectomy/Bilobectomy	69
White	Male	2004	Poorly differentiated; Grade III	IA	T1	N0	M0	Beam radiation	Yes	35	Dead	Lobectomy/Bilobectomy	71
White	Female	2004	Unknown	IA	T1	N0	M0	None/Unknown	No/Unknown	37	Dead	No Surgery Of Primary Site	76
White	Male	2004	Poorly differentiated; Grade III	IV	T4	N3	M1	Beam radiation	No/Unknown	6	Dead	No Surgery Of Primary Site	59
White	Male	2004	Moderately differentiated; Grade II	IIIB	T4	N2	M0	Beam radiation	Yes	29	Dead	Partial/Wedge/Segmental Resec., Lingulectomy, Partial Lobectomy, Sleeve Resec.	58
White	Male	2004	Poorly differentiated; Grade III	IB	T2	N0	M0	None/Unknown	No/Unknown	77	Dead	Lobectomy/Bilobectomy	81
White	Male	2004	Unknown	IIIA	T1	N2	M0	Beam radiation	Yes	1	Dead	No Surgery Of Primary Site	52
White	Male	2004	Poorly differentiated; Grade III	IA	T1	N0	M0	None/Unknown	No/Unknown	107	Dead	Lobectomy/Bilobectomy	70
White	Male	2004	Poorly differentiated; Grade III	IIIA	T1	N2	M0	Beam radiation	Yes	14	Dead	No Surgery Of Primary Site	75
White	Female	2004	Well differentiated; Grade I	IIIB	T1	N3	M0	Beam radiation	No/Unknown	21	Dead	No Surgery Of Primary Site	65
White	Female	2004	Poorly differentiated; Grade III	IV	T4	N0	M1	None/Unknown	No/Unknown	0	Dead	No Surgery Of Primary Site	71
White	Female	2004	Unknown	IA	T1	N0	M0	None/Unknown	No/Unknown	25	Dead	No Surgery Of Primary Site	74
White	Female	2004	Poorly differentiated; Grade III	IA	T1	N0	M0	None/Unknown	No/Unknown	50	Dead	Lobectomy/Bilobectomy	77
White	Male	2004	Poorly differentiated; Grade III	IA	T1	N0	M0	None/Unknown	No/Unknown	49	Dead	Lobectomy/Bilobectomy	77
White	Male	2004	Poorly differentiated; Grade III	IA	T1	N0	M0	None/Unknown	No/Unknown	72	Dead	Lobectomy/Bilobectomy	68
Other (American Indian/AK Native, Asian/Pacific Islander)	Female	2004	Poorly differentiated; Grade III	IV	T4	N3	M1	None/Unknown	No/Unknown	1	Dead	No Surgery Of Primary Site	69
White	Male	2004	Unknown	IIIB	T4	N0	M0	Beam radiation	Yes	58	Dead	Local Surgical Excision Or Destruction Of Lesion	71
Other (American Indian/AK Native, Asian/Pacific Islander)	Male	2004	Poorly differentiated; Grade III	IB	T2	N0	M0	None/Unknown	No/Unknown	140	Alive	Lobectomy/Bilobectomy	73
White	Male	2004	Unknown	IIIA	T1	N2	M0	Beam radiation	Yes	69	Dead	No Surgery Of Primary Site	71
White	Male	2004	Unknown	IA	T1	N0	M0	None/Unknown	No/Unknown	129	Dead	Lobectomy/Bilobectomy	77
White	Female	2004	Moderately differentiated; Grade II	IA	T1	N0	M0	None/Unknown	No/Unknown	135	Alive	Lobectomy/Bilobectomy	64
White	Male	2004	Poorly differentiated; Grade III	IA	T1	N0	M0	None/Unknown	No/Unknown	109	Dead	Lobectomy/Bilobectomy	73
White	Male	2004	Unknown	IIIA	T2	N2	M0	Beam radiation	Yes	62	Dead	No Surgery Of Primary Site	59
White	Female	2004	Well differentiated; Grade I	IB	T2	N0	M0	None/Unknown	Yes	45	Dead	Partial/Wedge/Segmental Resec., Lingulectomy, Partial Lobectomy, Sleeve Resec.	78
Other (American Indian/AK Native, Asian/Pacific Islander)	Female	2004	Moderately differentiated; Grade II	IIIA	T1	N2	M0	None/Unknown	Yes	44	Dead	Lobectomy/Bilobectomy	69
White	Male	2004	Moderately differentiated; Grade II	IIIA	T2	N2	M0	Beam radiation	No/Unknown	8	Dead	No Surgery Of Primary Site	84
White	Male	2004	Moderately differentiated; Grade II	IA	T1	N0	M0	None/Unknown	No/Unknown	136	Alive	Lobectomy/Bilobectomy	61
White	Male	2004	Moderately differentiated; Grade II	IA	T1	N0	M0	None/Unknown	No/Unknown	133	Alive	Lobectomy/Bilobectomy	64
White	Male	2004	Moderately differentiated; Grade II	IA	T1	N0	M0	Beam radiation	No/Unknown	4	Dead	No Surgery Of Primary Site	77
White	Female	2004	Poorly differentiated; Grade III	IA	T1	N0	M0	None/Unknown	No/Unknown	14	Dead	Lobectomy/Bilobectomy	65
White	Female	2004	Poorly differentiated; Grade III	IIA	T1	N1	M0	None/Unknown	No/Unknown	8	Dead	Lobectomy/Bilobectomy	78
White	Male	2004	Poorly differentiated; Grade III	IIIA	T1	N2	M0	None/Unknown	No/Unknown	4	Dead	Partial/Wedge/Segmental Resec., Lingulectomy, Partial Lobectomy, Sleeve Resec.	81
White	Female	2004	Poorly differentiated; Grade III	IA	T1	N0	M0	None/Unknown	Yes	97	Dead	Partial/Wedge/Segmental Resec., Lingulectomy, Partial Lobectomy, Sleeve Resec.	76
White	Male	2004	Poorly differentiated; Grade III	IIIB	T4	N0	M0	None/Unknown	No/Unknown	13	Dead	Lobectomy/Bilobectomy	78
White	Male	2004	Unknown	IV	T1	N2	M1	Beam radiation	No/Unknown	4	Dead	No Surgery Of Primary Site	61
White	Female	2004	Unknown	IIIA	T1	N2	M0	Beam radiation	Yes	49	Dead	No Surgery Of Primary Site	52
White	Male	2004	Poorly differentiated; Grade III	IA	T1	N0	M0	Beam radiation	No/Unknown	16	Dead	No Surgery Of Primary Site	76
White	Male	2004	Moderately differentiated; Grade II	IA	T1	N0	M0	None/Unknown	No/Unknown	17	Dead	Lobectomy/Bilobectomy	61
White	Male	2004	Unknown	IV	T1	N2	M1	None/Unknown	Yes	1	Dead	No Surgery Of Primary Site	60
White	Male	2004	Moderately differentiated; Grade II	IIIA	T1	N2	M0	Beam radiation	No/Unknown	4	Dead	Lobectomy/Bilobectomy	74
White	Male	2004	Poorly differentiated; Grade III	IA	T1	N0	M0	None/Unknown	No/Unknown	102	Dead	Lobectomy/Bilobectomy	77
White	Male	2004	Moderately differentiated; Grade II	IIB	T3	N0	M0	None/Unknown	No/Unknown	43	Dead	Lobectomy/Bilobectomy	54
White	Female	2004	Moderately differentiated; Grade II	IA	T1	N0	M0	None/Unknown	No/Unknown	44	Dead	Lobectomy/Bilobectomy	78
White	Male	2004	Unknown	IA	T1	N0	M0	None/Unknown	No/Unknown	24	Dead	Lobectomy/Bilobectomy	61
White	Female	2004	Moderately differentiated; Grade II	IV	T1	N1	M1	Beam radiation	No/Unknown	2	Dead	No Surgery Of Primary Site	66
White	Male	2004	Poorly differentiated; Grade III	IA	T1	N0	M0	None/Unknown	No/Unknown	140	Alive	Lobectomy/Bilobectomy	62
White	Male	2004	Moderately differentiated; Grade II	IIA	T1	N1	M0	None/Unknown	Yes	7	Dead	Lobectomy/Bilobectomy	55
White	Female	2004	Moderately differentiated; Grade II	IA	T1	N0	M0	None/Unknown	No/Unknown	66	Dead	Partial/Wedge/Segmental Resec., Lingulectomy, Partial Lobectomy, Sleeve Resec.	75
White	Female	2004	Moderately differentiated; Grade II	IIIA	T1	N2	M0	None/Unknown	Yes	22	Dead	Lobectomy/Bilobectomy	70
White	Female	2004	Moderately differentiated; Grade II	IA	T1	N0	M0	None/Unknown	No/Unknown	142	Alive	Lobectomy/Bilobectomy	69
White	Male	2004	Moderately differentiated; Grade II	IA	T1	N0	M0	None/Unknown	No/Unknown	73	Dead	Lobectomy/Bilobectomy	78
White	Female	2004	Moderately differentiated; Grade II	IA	T1	N0	M0	None/Unknown	No/Unknown	139	Alive	Lobectomy/Bilobectomy	63
White	Male	2004	Moderately differentiated; Grade II	IA	T1	N0	M0	None/Unknown	No/Unknown	128	Dead	Lobectomy/Bilobectomy	73
White	Female	2004	Moderately differentiated; Grade II	IA	T1	N0	M0	None/Unknown	No/Unknown	4	Dead	Partial/Wedge/Segmental Resec., Lingulectomy, Partial Lobectomy, Sleeve Resec.	75
White	Male	2004	Poorly differentiated; Grade III	IIA	T1	N1	M0	None/Unknown	Yes	91	Dead	Lobectomy/Bilobectomy	60
Black	Female	2004	Unknown	IA	T1	N0	M0	Beam radiation	No/Unknown	15	Dead	No Surgery Of Primary Site	83
Other (American Indian/AK Native, Asian/Pacific Islander)	Female	2004	Moderately differentiated; Grade II	IA	T1	N0	M0	None/Unknown	No/Unknown	104	Dead	Lobectomy/Bilobectomy	65
Other (American Indian/AK Native, Asian/Pacific Islander)	Female	2004	Poorly differentiated; Grade III	IIIA	T1	N2	M0	None/Unknown	Yes	5	Dead	Partial/Wedge/Segmental Resec., Lingulectomy, Partial Lobectomy, Sleeve Resec.	62
White	Male	2004	Moderately differentiated; Grade II	IV	T1	N2	M1	None/Unknown	Yes	9	Dead	No Surgery Of Primary Site	78
White	Male	2004	Poorly differentiated; Grade III	IV	T4	N2	M1	Beam radiation	Yes	3	Dead	No Surgery Of Primary Site	56
White	Male	2004	Undifferentiated; anaplastic; Grade IV	IB	T2	N0	M0	None/Unknown	No/Unknown	111	Dead	Lobectomy/Bilobectomy	67
White	Male	2004	Poorly differentiated; Grade III	IIB	T2	N1	M0	None/Unknown	Yes	43	Dead	Radical Pneumonectomy (Complete Pneumonectomy Plus Dissection Of Mediastinal LN)	56
White	Female	2004	Moderately differentiated; Grade II	IA	T1	N0	M0	None/Unknown	No/Unknown	9	Dead	No Surgery Of Primary Site	80
White	Female	2004	Moderately differentiated; Grade II	IA	T1	N0	M0	None/Unknown	No/Unknown	15	Dead	Lobectomy/Bilobectomy	53
White	Female	2004	Moderately differentiated; Grade II	IA	T1	N0	M0	None/Unknown	No/Unknown	133	Alive	Lobectomy/Bilobectomy	60
White	Male	2004	Poorly differentiated; Grade III	IA	T1	N0	M0	None/Unknown	No/Unknown	21	Dead	Radical Pneumonectomy (Complete Pneumonectomy Plus Dissection Of Mediastinal LN)	83
White	Female	2004	Poorly differentiated; Grade III	IIA	T1	N1	M0	None/Unknown	No/Unknown	43	Dead	Lobectomy/Bilobectomy	72
White	Male	2004	Unknown	IIIB	T1	N3	M0	None/Unknown	No/Unknown	7	Dead	No Surgery Of Primary Site	79
White	Male	2004	Moderately differentiated; Grade II	IA	T1	N0	M0	None/Unknown	No/Unknown	52	Dead	Partial/Wedge/Segmental Resec., Lingulectomy, Partial Lobectomy, Sleeve Resec.	78
White	Male	2004	Poorly differentiated; Grade III	IA	T1	N0	M0	None/Unknown	No/Unknown	65	Dead	Lobectomy/Bilobectomy	62
White	Male	2004	Poorly differentiated; Grade III	IA	T1	N0	M0	None/Unknown	No/Unknown	34	Dead	Lobectomy/Bilobectomy	69
White	Female	2004	Unknown	IA	T1	N0	M0	Beam radiation	Yes	127	Dead	Lobectomy/Bilobectomy	53
White	Female	2004	Moderately differentiated; Grade II	IV	T1	N0	M1	Beam radiation	Yes	2	Dead	No Surgery Of Primary Site	80
White	Male	2004	Moderately differentiated; Grade II	IA	T1	N0	M0	Beam radiation	Yes	5	Dead	Lobectomy/Bilobectomy	77
White	Male	2004	Moderately differentiated; Grade II	IA	T1	N0	M0	None/Unknown	No/Unknown	9	Dead	Lobectomy/Bilobectomy	66
White	Female	2004	Unknown	IV	T4	N2	M1	None/Unknown	Yes	4	Dead	No Surgery Of Primary Site	55
White	Male	2004	Moderately differentiated; Grade II	IA	T1	N0	M0	None/Unknown	No/Unknown	123	Alive	Partial/Wedge/Segmental Resec., Lingulectomy, Partial Lobectomy, Sleeve Resec.	63
White	Male	2004	Poorly differentiated; Grade III	IV	T2	N0	M1	None/Unknown	Yes	15	Dead	No Surgery Of Primary Site	78
White	Female	2004	Moderately differentiated; Grade II	IIIB	T4	N0	M0	None/Unknown	Yes	79	Dead	Lobectomy/Bilobectomy	62
White	Female	2004	Poorly differentiated; Grade III	IA	T1	N0	M0	None/Unknown	No/Unknown	80	Dead	Lobectomy/Bilobectomy	73
White	Female	2004	Moderately differentiated; Grade II	IIA	T1	N1	M0	None/Unknown	No/Unknown	139	Alive	Lobectomy/Bilobectomy	69
White	Male	2004	Poorly differentiated; Grade III	IA	T1	N0	M0	None/Unknown	No/Unknown	135	Alive	Lobectomy/Bilobectomy	54
White	Male	2004	Unknown	IV	T2	N2	M1	Beam radiation	No/Unknown	6	Dead	No Surgery Of Primary Site	68
White	Female	2004	Moderately differentiated; Grade II	IA	T1	N0	M0	Beam radiation	No/Unknown	49	Dead	Partial/Wedge/Segmental Resec., Lingulectomy, Partial Lobectomy, Sleeve Resec.	73
White	Female	2004	Unknown	IA	T1	N0	M0	None/Unknown	No/Unknown	127	Dead	Lobectomy/Bilobectomy	73
Black	Female	2004	Poorly differentiated; Grade III	IA	T1	N0	M0	Beam radiation	No/Unknown	13	Dead	No Surgery Of Primary Site	73
White	Female	2004	Moderately differentiated; Grade II	IB	T2	N0	M0	None/Unknown	No/Unknown	10	Dead	Lobectomy/Bilobectomy	75
White	Male	2004	Unknown	IA	T1	N0	M0	None/Unknown	No/Unknown	113	Alive	Lobectomy/Bilobectomy	49
White	Male	2004	Poorly differentiated; Grade III	IIIB	T1	N3	M0	Beam radiation	Yes	29	Dead	No Surgery Of Primary Site	63
White	Male	2004	Poorly differentiated; Grade III	IA	T1	N0	M0	None/Unknown	No/Unknown	44	Dead	Lobectomy/Bilobectomy	78
White	Female	2004	Moderately differentiated; Grade II	IA	T1	N0	M0	None/Unknown	No/Unknown	100	Dead	Partial/Wedge/Segmental Resec., Lingulectomy, Partial Lobectomy, Sleeve Resec.	72
White	Female	2004	Unknown	IIIA	T2	N2	M0	None/Unknown	No/Unknown	0	Dead	No Surgery Of Primary Site	82
White	Male	2004	Unknown	IA	T1	N0	M0	Beam radiation	No/Unknown	31	Dead	No Surgery Of Primary Site	59
White	Female	2004	Poorly differentiated; Grade III	IIA	T1	N1	M0	None/Unknown	No/Unknown	141	Alive	Lobectomy/Bilobectomy	67
White	Female	2004	Moderately differentiated; Grade II	IIIA	T1	N2	M0	None/Unknown	Yes	53	Dead	Lobectomy/Bilobectomy	52
White	Male	2004	Moderately differentiated; Grade II	IB	T2	N0	M0	None/Unknown	No/Unknown	68	Dead	Lobectomy/Bilobectomy	68
White	Male	2004	Unknown	IIIB	T4	N0	M0	Beam radiation	Yes	143	Alive	No Surgery Of Primary Site	56
White	Male	2004	Poorly differentiated; Grade III	IIA	T1	N1	M0	None/Unknown	Yes	49	Dead	Lobectomy/Bilobectomy	55
White	Male	2004	Moderately differentiated; Grade II	IA	T1	N0	M0	None/Unknown	No/Unknown	140	Alive	Lobectomy/Bilobectomy	64
White	Female	2004	Moderately differentiated; Grade II	IIIB	T4	N0	M0	Beam radiation	No/Unknown	1	Dead	No Surgery Of Primary Site	74
White	Female	2004	Poorly differentiated; Grade III	IA	T1	N0	M0	None/Unknown	No/Unknown	79	Dead	Partial/Wedge/Segmental Resec., Lingulectomy, Partial Lobectomy, Sleeve Resec.	68
White	Male	2004	Moderately differentiated; Grade II	IA	T1	N0	M0	Beam radiation	No/Unknown	16	Dead	Partial/Wedge/Segmental Resec., Lingulectomy, Partial Lobectomy, Sleeve Resec.	78
White	Male	2004	Unknown	IA	T1	N0	M0	Beam radiation	No/Unknown	6	Dead	No Surgery Of Primary Site	71
White	Male	2004	Moderately differentiated; Grade II	IB	T2	N0	M0	None/Unknown	No/Unknown	135	Alive	Lobectomy/Bilobectomy	64
White	Female	2004	Poorly differentiated; Grade III	IIIB	T1	N3	M0	None/Unknown	Yes	5	Dead	No Surgery Of Primary Site	67
White	Male	2004	Poorly differentiated; Grade III	IB	T2	N0	M0	Beam radiation	No/Unknown	7	Dead	No Surgery Of Primary Site	86
Black	Male	2004	Poorly differentiated; Grade III	IV	T1	N0	M1	Beam radiation	No/Unknown	21	Dead	No Surgery Of Primary Site	79
White	Female	2004	Poorly differentiated; Grade III	IB	T2	N0	M0	None/Unknown	No/Unknown	9	Dead	No Surgery Of Primary Site	78
White	Female	2004	Moderately differentiated; Grade II	IA	T1	N0	M0	None/Unknown	No/Unknown	33	Dead	Lobectomy/Bilobectomy	77
White	Male	2004	Unknown	IIIA	T1	N2	M0	Beam radiation	No/Unknown	19	Dead	No Surgery Of Primary Site	87
White	Male	2004	Poorly differentiated; Grade III	IA	T1	N0	M0	None/Unknown	No/Unknown	90	Dead	Lobectomy/Bilobectomy	78
White	Male	2004	Poorly differentiated; Grade III	IA	T1	N0	M0	None/Unknown	No/Unknown	50	Dead	Lobectomy/Bilobectomy	71
White	Male	2004	Moderately differentiated; Grade II	IIIA	T1	N2	M0	Beam radiation	No/Unknown	27	Dead	No Surgery Of Primary Site	74
White	Male	2004	Moderately differentiated; Grade II	IIIB	T4	N0	M0	Beam radiation	Yes	15	Dead	Lobectomy/Bilobectomy	69
White	Male	2004	Unknown	IIIB	T1	N3	M0	Beam radiation	Yes	43	Dead	No Surgery Of Primary Site	69
White	Female	2004	Poorly differentiated; Grade III	IA	T1	N0	M0	None/Unknown	No/Unknown	18	Dead	Lobectomy/Bilobectomy	58
Black	Male	2004	Moderately differentiated; Grade II	IA	T1	N0	M0	None/Unknown	No/Unknown	143	Alive	Lobectomy/Bilobectomy	64
Black	Male	2004	Moderately differentiated; Grade II	IA	T1	N0	M0	None/Unknown	No/Unknown	53	Dead	Lobectomy/Bilobectomy	76
White	Female	2004	Poorly differentiated; Grade III	IIIB	T4	N0	M0	None/Unknown	No/Unknown	53	Dead	Lobectomy/Bilobectomy	76
White	Male	2004	Moderately differentiated; Grade II	IA	T1	N0	M0	None/Unknown	No/Unknown	33	Dead	Lobectomy/Bilobectomy	76
White	Male	2004	Moderately differentiated; Grade II	IA	T1	N0	M0	None/Unknown	No/Unknown	24	Dead	Partial/Wedge/Segmental Resec., Lingulectomy, Partial Lobectomy, Sleeve Resec.	82
White	Male	2004	Moderately differentiated; Grade II	IA	T1	N0	M0	None/Unknown	No/Unknown	44	Dead	Partial/Wedge/Segmental Resec., Lingulectomy, Partial Lobectomy, Sleeve Resec.	61
White	Male	2004	Unknown	IIIA	T1	N2	M0	None/Unknown	Yes	31	Dead	No Surgery Of Primary Site	70
White	Female	2004	Unknown	IIIA	T1	N2	M0	Beam radiation	Yes	94	Dead	No Surgery Of Primary Site	75
White	Male	2004	Poorly differentiated; Grade III	IB	T2	N0	M0	Beam radiation	No/Unknown	58	Dead	Partial/Wedge/Segmental Resec., Lingulectomy, Partial Lobectomy, Sleeve Resec.	81
Black	Male	2004	Poorly differentiated; Grade III	IB	T2	N0	M0	None/Unknown	No/Unknown	54	Dead	Lobectomy/Bilobectomy	58
White	Male	2004	Moderately differentiated; Grade II	IA	T1	N0	M0	None/Unknown	No/Unknown	3	Dead	Lobectomy/Bilobectomy	71
White	Female	2004	Unknown	IV	T4	N2	M1	None/Unknown	No/Unknown	2	Dead	No Surgery Of Primary Site	56
White	Male	2004	Poorly differentiated; Grade III	IIIB	T1	N3	M0	None/Unknown	Yes	1	Dead	No Surgery Of Primary Site	75
White	Female	2004	Poorly differentiated; Grade III	IA	T1	N0	M0	None/Unknown	No/Unknown	77	Dead	Lobectomy/Bilobectomy	86
White	Female	2004	Unknown	IA	T1	N0	M0	Beam radiation	Yes	11	Dead	No Surgery Of Primary Site	81
White	Male	2004	Unknown	IA	T1	N0	M0	None/Unknown	No/Unknown	0	Dead	No Surgery Of Primary Site	81
Black	Male	2004	Moderately differentiated; Grade II	IIB	T3	N0	M0	Beam radiation	Yes	90	Dead	Lobectomy/Bilobectomy	47
White	Male	2004	Moderately differentiated; Grade II	IIIB	T4	N1	M0	None/Unknown	No/Unknown	136	Alive	Lobectomy/Bilobectomy	71
Other (American Indian/AK Native, Asian/Pacific Islander)	Male	2004	Moderately differentiated; Grade II	IIA	T1	N1	M0	None/Unknown	No/Unknown	1	Dead	Radical Pneumonectomy (Complete Pneumonectomy Plus Dissection Of Mediastinal LN)	69
Other (American Indian/AK Native, Asian/Pacific Islander)	Male	2004	Poorly differentiated; Grade III	IA	T1	N0	M0	None/Unknown	No/Unknown	132	Alive	Lobectomy/Bilobectomy	64
Other (American Indian/AK Native, Asian/Pacific Islander)	Male	2004	Poorly differentiated; Grade III	IIIA	T2	N2	M0	None/Unknown	Yes	115	Dead	Lobectomy/Bilobectomy	78
White	Male	2004	Moderately differentiated; Grade II	IIIA	T3	N1	M0	None/Unknown	No/Unknown	60	Dead	Lobectomy/Bilobectomy	79
White	Female	2004	Poorly differentiated; Grade III	IV	T1	N0	M1	None/Unknown	No/Unknown	76	Dead	Lobectomy/Bilobectomy	78
White	Female	2004	Poorly differentiated; Grade III	IB	T2	N0	M0	None/Unknown	No/Unknown	81	Dead	Lobectomy/Bilobectomy	80
White	Male	2004	Poorly differentiated; Grade III	IB	T2	N0	M0	None/Unknown	No/Unknown	6	Dead	Lobectomy/Bilobectomy	75
White	Female	2004	Poorly differentiated; Grade III	IA	T1	N0	M0	Beam radiation	Yes	9	Dead	No Surgery Of Primary Site	37
White	Male	2004	Poorly differentiated; Grade III	IA	T1	N0	M0	None/Unknown	No/Unknown	136	Alive	Lobectomy/Bilobectomy	46
White	Male	2004	Unknown	IIIA	T1	N2	M0	None/Unknown	Yes	9	Dead	No Surgery Of Primary Site	70
White	Female	2004	Well differentiated; Grade I	IA	T1	N0	M0	None/Unknown	No/Unknown	53	Dead	Lobectomy/Bilobectomy	77
White	Male	2004	Poorly differentiated; Grade III	IB	T2	N0	M0	None/Unknown	No/Unknown	25	Dead	Partial/Wedge/Segmental Resec., Lingulectomy, Partial Lobectomy, Sleeve Resec.	78
White	Male	2004	Poorly differentiated; Grade III	IIIA	T1	N2	M0	None/Unknown	No/Unknown	138	Alive	Lobectomy/Bilobectomy	77
White	Male	2004	Moderately differentiated; Grade II	IIA	T1	N1	M0	None/Unknown	No/Unknown	134	Alive	Lobectomy/Bilobectomy	59
White	Female	2004	Poorly differentiated; Grade III	IIIB	T4	N0	M0	None/Unknown	No/Unknown	139	Alive	Lobectomy/Bilobectomy	72
White	Female	2004	Moderately differentiated; Grade II	IA	T1	N0	M0	None/Unknown	No/Unknown	139	Alive	Lobectomy/Bilobectomy	73
White	Male	2004	Moderately differentiated; Grade II	IIA	T1	N1	M0	None/Unknown	No/Unknown	67	Dead	Lobectomy/Bilobectomy	84
White	Male	2004	Poorly differentiated; Grade III	IA	T1	N0	M0	None/Unknown	No/Unknown	42	Dead	No Surgery Of Primary Site	82
White	Male	2004	Moderately differentiated; Grade II	IA	T1	N0	M0	Beam radiation	Yes	41	Dead	Partial/Wedge/Segmental Resec., Lingulectomy, Partial Lobectomy, Sleeve Resec.	76
White	Female	2004	Unknown	IV	T4	N0	M1	None/Unknown	No/Unknown	0	Dead	No Surgery Of Primary Site	80
White	Male	2004	Unknown	IV	T4	N2	M1	None/Unknown	No/Unknown	1	Dead	No Surgery Of Primary Site	59
Black	Male	2004	Unknown	IIIA	T1	N2	M0	Beam radiation	Yes	20	Dead	No Surgery Of Primary Site	83
White	Female	2004	Unknown	IIIA	T2	N2	M0	Beam radiation	Yes	9	Dead	No Surgery Of Primary Site	53
White	Male	2004	Poorly differentiated; Grade III	IIA	T1	N1	M0	None/Unknown	No/Unknown	29	Dead	Lobectomy/Bilobectomy	70
White	Male	2004	Poorly differentiated; Grade III	IA	T1	N0	M0	None/Unknown	No/Unknown	55	Dead	Lobectomy/Bilobectomy	82
White	Male	2004	Poorly differentiated; Grade III	IA	T1	N0	M0	None/Unknown	No/Unknown	139	Alive	Lobectomy/Bilobectomy	68
White	Male	2004	Moderately differentiated; Grade II	IA	T1	N0	M0	Beam radiation	No/Unknown	46	Dead	Lobectomy/Bilobectomy	77
White	Female	2004	Moderately differentiated; Grade II	IIA	T1	N1	M0	None/Unknown	Yes	55	Dead	Lobectomy/Bilobectomy	65
Black	Male	2004	Well differentiated; Grade I	IIIA	T2	N2	M0	Beam radiation	No/Unknown	37	Dead	No Surgery Of Primary Site	61
White	Male	2004	Unknown	IV	T4	N2	M1	None/Unknown	No/Unknown	1	Dead	No Surgery Of Primary Site	76
White	Male	2004	Moderately differentiated; Grade II	IA	T1	N0	M0	None/Unknown	No/Unknown	43	Dead	Lobectomy/Bilobectomy	75
White	Female	2004	Unknown	IA	T1	N0	M0	Beam radiation	Yes	44	Dead	No Surgery Of Primary Site	68
Other (American Indian/AK Native, Asian/Pacific Islander)	Male	2004	Unknown	IV	T3	N2	M1	None/Unknown	Yes	15	Dead	No Surgery Of Primary Site	69
Other (American Indian/AK Native, Asian/Pacific Islander)	Male	2004	Moderately differentiated; Grade II	IA	T1	N0	M0	None/Unknown	No/Unknown	132	Alive	Lobectomy/Bilobectomy	67
White	Female	2004	Unknown	IA	T1	N0	M0	Beam radiation	No/Unknown	69	Dead	No Surgery Of Primary Site	53
White	Female	2004	Unknown	IIIB	T4	N2	M0	Beam radiation	No/Unknown	9	Dead	No Surgery Of Primary Site	73
White	Male	2004	Poorly differentiated; Grade III	IA	T1	N0	M0	None/Unknown	No/Unknown	28	Dead	Lobectomy/Bilobectomy	65
White	Male	2004	Poorly differentiated; Grade III	IIA	T1	N1	M0	Beam radiation	Yes	140	Alive	Lobectomy/Bilobectomy	76
White	Male	2004	Moderately differentiated; Grade II	IIIA	T1	N2	M0	None/Unknown	No/Unknown	140	Alive	Lobectomy/Bilobectomy	66
White	Male	2004	Poorly differentiated; Grade III	IA	T1	N0	M0	None/Unknown	No/Unknown	113	Dead	Lobectomy/Bilobectomy	78
White	Male	2004	Moderately differentiated; Grade II	IIA	T1	N1	M0	None/Unknown	No/Unknown	72	Dead	Lobectomy/Bilobectomy	55
White	Female	2004	Poorly differentiated; Grade III	IB	T2	N0	M0	None/Unknown	No/Unknown	1	Dead	Lobectomy/Bilobectomy	77
Black	Male	2004	Unknown	IV	T1	N0	M1	Beam radiation	Yes	11	Dead	No Surgery Of Primary Site	73
White	Male	2004	Poorly differentiated; Grade III	IA	T1	N0	M0	None/Unknown	No/Unknown	55	Dead	Partial/Wedge/Segmental Resec., Lingulectomy, Partial Lobectomy, Sleeve Resec.	75
White	Male	2004	Poorly differentiated; Grade III	IA	T1	N0	M0	None/Unknown	No/Unknown	131	Dead	Radical Pneumonectomy (Complete Pneumonectomy Plus Dissection Of Mediastinal LN)	52
White	Female	2004	Poorly differentiated; Grade III	IA	T1	N0	M0	None/Unknown	No/Unknown	85	Dead	Lobectomy/Bilobectomy	68
White	Male	2004	Moderately differentiated; Grade II	IA	T1	N0	M0	None/Unknown	No/Unknown	2	Dead	Lobectomy/Bilobectomy	61
White	Female	2004	Poorly differentiated; Grade III	IV	T4	N2	M1	None/Unknown	No/Unknown	0	Dead	No Surgery Of Primary Site	60
White	Female	2004	Unknown	IA	T1	N0	M0	Beam radiation	No/Unknown	23	Dead	No Surgery Of Primary Site	75
White	Male	2004	Poorly differentiated; Grade III	IA	T1	N0	M0	None/Unknown	No/Unknown	60	Dead	No Surgery Of Primary Site	80
White	Male	2004	Moderately differentiated; Grade II	IIB	T3	N0	M0	Beam radiation	Yes	37	Dead	Lobectomy/Bilobectomy	79
White	Male	2004	Unknown	IA	T1	N0	M0	None/Unknown	No/Unknown	134	Dead	Lobectomy/Bilobectomy	67
White	Male	2004	Unknown	IIIB	T1	N3	M0	Beam radiation	No/Unknown	23	Dead	No Surgery Of Primary Site	61
White	Female	2004	Poorly differentiated; Grade III	IA	T1	N0	M0	None/Unknown	No/Unknown	119	Alive	Lobectomy/Bilobectomy	83
White	Male	2004	Poorly differentiated; Grade III	IA	T1	N0	M0	None/Unknown	No/Unknown	88	Dead	Lobectomy/Bilobectomy	66
White	Male	2004	Unknown	IIIB	T4	N2	M0	None/Unknown	Yes	26	Dead	No Surgery Of Primary Site	71
White	Female	2004	Poorly differentiated; Grade III	IIA	T1	N1	M0	None/Unknown	Yes	134	Alive	Lobectomy/Bilobectomy	61
White	Female	2004	Poorly differentiated; Grade III	IIA	T1	N1	M0	None/Unknown	Yes	15	Dead	Lobectomy/Bilobectomy	58
White	Male	2004	Poorly differentiated; Grade III	IA	T1	N0	M0	Beam radiation	No/Unknown	13	Dead	No Surgery Of Primary Site	72
White	Male	2004	Poorly differentiated; Grade III	IA	T1	N0	M0	None/Unknown	No/Unknown	28	Dead	Lobectomy/Bilobectomy	75
White	Female	2004	Poorly differentiated; Grade III	IV	T4	N0	M1	None/Unknown	No/Unknown	13	Dead	Lobectomy/Bilobectomy	77
White	Male	2004	Unknown	IB	T2	N0	M0	None/Unknown	Yes	139	Dead	Lobectomy/Bilobectomy	73
White	Male	2004	Moderately differentiated; Grade II	IIIB	T1	N3	M0	Beam radiation	Yes	13	Dead	No Surgery Of Primary Site	66
White	Female	2004	Unknown	IV	T4	N3	M1	None/Unknown	Yes	9	Dead	No Surgery Of Primary Site	43
White	Male	2004	Unknown	IV	T4	N2	M1	None/Unknown	No/Unknown	4	Dead	No Surgery Of Primary Site	56
White	Female	2004	Poorly differentiated; Grade III	IA	T1	N0	M0	None/Unknown	Yes	137	Alive	Lobectomy/Bilobectomy	58
White	Male	2004	Unknown	IA	T1	N0	M0	Beam radiation	No/Unknown	62	Dead	No Surgery Of Primary Site	77
White	Female	2004	Moderately differentiated; Grade II	IA	T1	N0	M0	None/Unknown	No/Unknown	44	Dead	Lobectomy/Bilobectomy	59
White	Female	2004	Moderately differentiated; Grade II	IA	T1	N0	M0	None/Unknown	No/Unknown	42	Dead	Lobectomy/Bilobectomy	81
White	Female	2004	Unknown	IV	T1	N0	M1	Beam radiation	Yes	12	Dead	No Surgery Of Primary Site	64
White	Male	2004	Moderately differentiated; Grade II	IA	T1	N0	M0	None/Unknown	No/Unknown	9	Dead	Lobectomy/Bilobectomy	63
White	Male	2004	Poorly differentiated; Grade III	IV	T1	N2	M1	Beam radiation	No/Unknown	1	Dead	No Surgery Of Primary Site	65
White	Male	2004	Poorly differentiated; Grade III	IIIB	T1	N3	M0	Beam radiation	Yes	113	Dead	No Surgery Of Primary Site	61
Black	Female	2004	Moderately differentiated; Grade II	IIIA	T1	N2	M0	Beam radiation	No/Unknown	37	Dead	No Surgery Of Primary Site	87
Black	Female	2004	Poorly differentiated; Grade III	IA	T1	N0	M0	None/Unknown	No/Unknown	65	Dead	Lobectomy/Bilobectomy	71
Black	Male	2004	Poorly differentiated; Grade III	IA	T1	N0	M0	None/Unknown	No/Unknown	5	Dead	Lobectomy/Bilobectomy	67
White	Male	2004	Unknown	IIIB	T4	N0	M0	Beam radiation	Yes	10	Dead	No Surgery Of Primary Site	63
White	Male	2004	Poorly differentiated; Grade III	IA	T1	N0	M0	Beam radiation	No/Unknown	3	Dead	No Surgery Of Primary Site	70
Black	Female	2004	Moderately differentiated; Grade II	IA	T1	N0	M0	None/Unknown	No/Unknown	134	Alive	Partial/Wedge/Segmental Resec., Lingulectomy, Partial Lobectomy, Sleeve Resec.	59
Black	Female	2004	Unknown	IV	T1	N1	M1	None/Unknown	No/Unknown	0	Dead	No Surgery Of Primary Site	75
White	Female	2004	Poorly differentiated; Grade III	IIIA	T2	N2	M0	Beam radiation	No/Unknown	40	Dead	No Surgery Of Primary Site	80
White	Male	2004	Poorly differentiated; Grade III	IV	T2	N2	M1	Beam radiation	Yes	32	Dead	Partial/Wedge/Segmental Resec., Lingulectomy, Partial Lobectomy, Sleeve Resec.	73
White	Male	2004	Moderately differentiated; Grade II	IB	T2	N0	M0	None/Unknown	No/Unknown	136	Alive	Lobectomy/Bilobectomy	60
White	Male	2004	Moderately differentiated; Grade II	IIA	T1	N1	M0	None/Unknown	No/Unknown	75	Dead	Partial/Wedge/Segmental Resec., Lingulectomy, Partial Lobectomy, Sleeve Resec.	65
White	Male	2004	Poorly differentiated; Grade III	IIIA	T2	N2	M0	Beam radiation	No/Unknown	84	Dead	Lobectomy/Bilobectomy	76
Black	Male	2004	Poorly differentiated; Grade III	IIIA	T2	N2	M0	None/Unknown	No/Unknown	76	Dead	Lobectomy/Bilobectomy	80
Black	Male	2004	Moderately differentiated; Grade II	IIIB	T1	N3	M0	None/Unknown	Yes	20	Dead	No Surgery Of Primary Site	84
White	Female	2004	Moderately differentiated; Grade II	IA	T1	N0	M0	None/Unknown	No/Unknown	134	Dead	Partial/Wedge/Segmental Resec., Lingulectomy, Partial Lobectomy, Sleeve Resec.	66
White	Female	2004	Moderately differentiated; Grade II	IIIB	T4	N1	M0	Beam radiation	No/Unknown	21	Dead	Lobectomy/Bilobectomy	65
Black	Female	2004	Undifferentiated; anaplastic; Grade IV	IA	T1	N0	M0	Beam radiation	No/Unknown	5	Dead	No Surgery Of Primary Site	75
White	Female	2004	Poorly differentiated; Grade III	IA	T1	N0	M0	None/Unknown	No/Unknown	137	Dead	Lobectomy/Bilobectomy	59
White	Female	2004	Moderately differentiated; Grade II	IIIA	T1	N2	M0	None/Unknown	No/Unknown	5	Dead	Lobectomy/Bilobectomy	74
White	Female	2004	Moderately differentiated; Grade II	IB	T2	N0	M0	None/Unknown	No/Unknown	132	Alive	Lobectomy/Bilobectomy	75
White	Male	2004	Moderately differentiated; Grade II	IIIA	T1	N2	M0	None/Unknown	No/Unknown	143	Alive	Lobectomy/Bilobectomy	72
White	Female	2004	Poorly differentiated; Grade III	IA	T1	N0	M0	None/Unknown	No/Unknown	142	Alive	Lobectomy/Bilobectomy	66
Black	Male	2004	Poorly differentiated; Grade III	IA	T1	N0	M0	None/Unknown	No/Unknown	35	Dead	Lobectomy/Bilobectomy	75
White	Male	2004	Moderately differentiated; Grade II	IA	T1	N0	M0	None/Unknown	No/Unknown	135	Alive	Lobectomy/Bilobectomy	72
White	Female	2004	Poorly differentiated; Grade III	IA	T1	N0	M0	None/Unknown	No/Unknown	73	Dead	Lobectomy/Bilobectomy	65
White	Male	2004	Poorly differentiated; Grade III	IA	T1	N0	M0	None/Unknown	No/Unknown	135	Alive	Lobectomy/Bilobectomy	64
Other (American Indian/AK Native, Asian/Pacific Islander)	Male	2004	Moderately differentiated; Grade II	IA	T1	N0	M0	None/Unknown	Yes	133	Alive	Lobectomy/Bilobectomy	58
White	Male	2004	Moderately differentiated; Grade II	IB	T2	N0	M0	Beam radiation	Yes	4	Dead	Partial/Wedge/Segmental Resec., Lingulectomy, Partial Lobectomy, Sleeve Resec.	75
Black	Male	2004	Poorly differentiated; Grade III	IB	T2	N0	M0	None/Unknown	No/Unknown	23	Dead	Lobectomy/Bilobectomy	70
White	Male	2004	Poorly differentiated; Grade III	IA	T1	N0	M0	None/Unknown	Yes	18	Dead	Partial/Wedge/Segmental Resec., Lingulectomy, Partial Lobectomy, Sleeve Resec.	73
White	Female	2004	Unknown	IV	T2	N0	M1	None/Unknown	No/Unknown	39	Dead	No Surgery Of Primary Site	69
White	Male	2004	Poorly differentiated; Grade III	IB	T2	N0	M0	None/Unknown	Yes	14	Dead	Lobectomy/Bilobectomy	63
White	Male	2004	Unknown	IB	T2	N0	M0	Beam radiation	Yes	38	Dead	No Surgery Of Primary Site	72
White	Female	2004	Poorly differentiated; Grade III	IA	T1	N0	M0	None/Unknown	No/Unknown	4	Dead	No Surgery Of Primary Site	76
White	Female	2004	Poorly differentiated; Grade III	IIIB	T4	N2	M0	None/Unknown	Yes	15	Dead	No Surgery Of Primary Site	75
White	Male	2004	Poorly differentiated; Grade III	IIIA	T2	N2	M0	Beam radiation	No/Unknown	4	Dead	No Surgery Of Primary Site	82
White	Female	2004	Moderately differentiated; Grade II	IA	T1	N0	M0	None/Unknown	No/Unknown	45	Dead	No Surgery Of Primary Site	74
White	Male	2004	Poorly differentiated; Grade III	IB	T2	N0	M0	None/Unknown	No/Unknown	0	Dead	Lobectomy/Bilobectomy	76
White	Male	2004	Poorly differentiated; Grade III	IA	T1	N0	M0	None/Unknown	No/Unknown	93	Dead	Lobectomy/Bilobectomy	79
White	Female	2004	Moderately differentiated; Grade II	IIIA	T3	N2	M0	Beam radiation	Yes	3	Dead	No Surgery Of Primary Site	53
White	Female	2004	Moderately differentiated; Grade II	IA	T1	N0	M0	None/Unknown	No/Unknown	37	Dead	Lobectomy/Bilobectomy	76
White	Female	2004	Poorly differentiated; Grade III	IA	T1	N0	M0	None/Unknown	No/Unknown	78	Dead	Lobectomy/Bilobectomy	71
Other (American Indian/AK Native, Asian/Pacific Islander)	Female	2004	Well differentiated; Grade I	IA	T1	N0	M0	None/Unknown	No/Unknown	24	Dead	No Surgery Of Primary Site	82
White	Female	2004	Moderately differentiated; Grade II	IA	T1	N0	M0	None/Unknown	No/Unknown	116	Dead	Lobectomy/Bilobectomy	73
White	Female	2004	Unknown	IV	T4	N2	M1	Beam radiation	Yes	16	Dead	No Surgery Of Primary Site	57
White	Male	2004	Poorly differentiated; Grade III	IA	T1	N0	M0	None/Unknown	No/Unknown	133	Dead	Lobectomy/Bilobectomy	77
White	Female	2004	Unknown	IV	T1	N2	M1	None/Unknown	No/Unknown	4	Dead	No Surgery Of Primary Site	78
White	Male	2004	Unknown	IIIB	T4	N2	M0	None/Unknown	No/Unknown	10	Dead	No Surgery Of Primary Site	73
White	Male	2004	Moderately differentiated; Grade II	IIIB	T4	N0	M0	Beam radiation	No/Unknown	10	Dead	No Surgery Of Primary Site	68
Other (American Indian/AK Native, Asian/Pacific Islander)	Male	2004	Moderately differentiated; Grade II	IA	T1	N0	M0	None/Unknown	No/Unknown	2	Dead	No Surgery Of Primary Site	82
White	Male	2004	Unknown	IV	T4	N3	M1	Beam radiation	Yes	5	Dead	No Surgery Of Primary Site	59
White	Male	2004	Moderately differentiated; Grade II	IA	T1	N0	M0	None/Unknown	No/Unknown	31	Dead	Partial/Wedge/Segmental Resec., Lingulectomy, Partial Lobectomy, Sleeve Resec.	80
White	Male	2004	Moderately differentiated; Grade II	IB	T2	N0	M0	None/Unknown	No/Unknown	90	Dead	Lobectomy/Bilobectomy	62
White	Male	2004	Poorly differentiated; Grade III	IA	T1	N0	M0	None/Unknown	No/Unknown	78	Dead	Lobectomy/Bilobectomy	58
White	Male	2004	Poorly differentiated; Grade III	IA	T1	N0	M0	None/Unknown	No/Unknown	125	Alive	Lobectomy/Bilobectomy	57
White	Female	2004	Unknown	IA	T1	N0	M0	Beam radiation	No/Unknown	36	Dead	No Surgery Of Primary Site	76
White	Female	2004	Poorly differentiated; Grade III	IA	T1	N0	M0	None/Unknown	No/Unknown	58	Dead	Lobectomy/Bilobectomy	64
White	Female	2004	Unknown	IV	T4	N2	M1	Beam radiation	No/Unknown	1	Dead	No Surgery Of Primary Site	45
White	Male	2004	Unknown	IV	T1	N2	M1	Beam radiation	Yes	10	Dead	No Surgery Of Primary Site	81
White	Female	2004	Moderately differentiated; Grade II	IIIB	T2	N3	M0	Beam radiation	No/Unknown	24	Dead	No Surgery Of Primary Site	56
White	Female	2004	Poorly differentiated; Grade III	IIA	T1	N1	M0	None/Unknown	No/Unknown	69	Dead	Lobectomy/Bilobectomy	61
White	Female	2004	Unknown	IV	T4	N3	M1	Beam radiation	Yes	17	Dead	No Surgery Of Primary Site	42
White	Female	2004	Unknown	IIIA	T1	N2	M0	None/Unknown	No/Unknown	0	Dead	No Surgery Of Primary Site	82
White	Female	2004	Moderately differentiated; Grade II	IB	T2	N0	M0	None/Unknown	No/Unknown	133	Alive	Lobectomy/Bilobectomy	60
White	Female	2004	Poorly differentiated; Grade III	IA	T1	N0	M0	None/Unknown	No/Unknown	132	Alive	Lobectomy/Bilobectomy	76
White	Female	2004	Poorly differentiated; Grade III	IB	T2	N0	M0	None/Unknown	Yes	126	Dead	Lobectomy/Bilobectomy	72
White	Male	2004	Poorly differentiated; Grade III	IA	T1	N0	M0	None/Unknown	No/Unknown	136	Alive	Lobectomy/Bilobectomy	73
White	Male	2004	Poorly differentiated; Grade III	IA	T1	N0	M0	None/Unknown	No/Unknown	142	Alive	Lobectomy/Bilobectomy	76
White	Female	2004	Poorly differentiated; Grade III	IV	T4	N2	M1	None/Unknown	No/Unknown	2	Dead	No Surgery Of Primary Site	77
White	Male	2004	Moderately differentiated; Grade II	IA	T1	N0	M0	None/Unknown	No/Unknown	108	Dead	Lobectomy/Bilobectomy	69
White	Female	2004	Poorly differentiated; Grade III	IIA	T1	N1	M0	None/Unknown	No/Unknown	13	Dead	Radical Pneumonectomy (Complete Pneumonectomy Plus Dissection Of Mediastinal LN)	51
White	Female	2004	Poorly differentiated; Grade III	IA	T1	N0	M0	None/Unknown	No/Unknown	87	Dead	Partial/Wedge/Segmental Resec., Lingulectomy, Partial Lobectomy, Sleeve Resec.	61
White	Female	2004	Moderately differentiated; Grade II	IB	T2	N0	M0	None/Unknown	No/Unknown	36	Dead	Partial/Wedge/Segmental Resec., Lingulectomy, Partial Lobectomy, Sleeve Resec.	62
White	Male	2004	Unknown	IA	T1	N0	M0	Beam radiation	No/Unknown	28	Dead	No Surgery Of Primary Site	64
White	Female	2004	Well differentiated; Grade I	IV	T1	N1	M1	Beam radiation	Yes	15	Dead	No Surgery Of Primary Site	66
White	Male	2004	Poorly differentiated; Grade III	IA	T1	N0	M0	None/Unknown	No/Unknown	125	Dead	Partial/Wedge/Segmental Resec., Lingulectomy, Partial Lobectomy, Sleeve Resec.	52
White	Female	2004	Moderately differentiated; Grade II	IA	T1	N0	M0	None/Unknown	No/Unknown	87	Dead	Lobectomy/Bilobectomy	71
White	Female	2004	Moderately differentiated; Grade II	IIIA	T1	N2	M0	Beam radiation	Yes	15	Dead	Lobectomy/Bilobectomy	59
White	Male	2004	Poorly differentiated; Grade III	IA	T1	N0	M0	None/Unknown	No/Unknown	142	Alive	Lobectomy/Bilobectomy	58
White	Female	2004	Moderately differentiated; Grade II	IIA	T1	N1	M0	Beam radiation	Yes	36	Dead	Lobectomy/Bilobectomy	68
White	Male	2004	Unknown	IIIB	T1	N3	M0	Beam radiation	No/Unknown	8	Dead	No Surgery Of Primary Site	71
White	Male	2004	Unknown	IIIA	T2	N2	M0	Beam radiation	No/Unknown	11	Dead	No Surgery Of Primary Site	72
White	Male	2004	Unknown	IA	T1	N0	M0	None/Unknown	No/Unknown	104	Dead	Lobectomy/Bilobectomy	84
White	Female	2004	Undifferentiated; anaplastic; Grade IV	IIIA	T3	N2	M0	Beam radiation	Yes	63	Dead	Lobectomy/Bilobectomy	74
White	Male	2004	Poorly differentiated; Grade III	IV	T1	N1	M1	Beam radiation	Yes	22	Dead	Radical Pneumonectomy (Complete Pneumonectomy Plus Dissection Of Mediastinal LN)	64
White	Female	2004	Unknown	IIA	T1	N1	M0	Beam radiation	Yes	11	Dead	No Surgery Of Primary Site	68
White	Female	2004	Poorly differentiated; Grade III	IA	T1	N0	M0	None/Unknown	Yes	31	Dead	Lobectomy/Bilobectomy	59
White	Female	2004	Poorly differentiated; Grade III	IIA	T1	N1	M0	None/Unknown	No/Unknown	59	Dead	Lobectomy/Bilobectomy	58
White	Male	2004	Poorly differentiated; Grade III	IIIA	T2	N2	M0	None/Unknown	No/Unknown	52	Dead	Lobectomy/Bilobectomy	72
Black	Male	2004	Poorly differentiated; Grade III	IIIA	T1	N2	M0	None/Unknown	No/Unknown	22	Dead	Complete/Total/Standard Pneumonectomy; Pneumonectomy, Nos	68
White	Male	2004	Unknown	IIIA	T1	N2	M0	Beam radiation	Yes	9	Dead	No Surgery Of Primary Site	70
White	Male	2004	Moderately differentiated; Grade II	IA	T1	N0	M0	None/Unknown	No/Unknown	101	Dead	Lobectomy/Bilobectomy	71
White	Female	2004	Poorly differentiated; Grade III	IIIB	T4	N2	M0	Beam radiation	No/Unknown	5	Dead	No Surgery Of Primary Site	57
White	Male	2004	Poorly differentiated; Grade III	IIA	T1	N1	M0	None/Unknown	Yes	64	Dead	Lobectomy/Bilobectomy	58
White	Male	2004	Poorly differentiated; Grade III	IIIB	T4	N2	M0	Beam radiation	Yes	87	Dead	Lobectomy/Bilobectomy	70
White	Male	2004	Moderately differentiated; Grade II	IIIB	T4	N0	M0	None/Unknown	No/Unknown	37	Dead	Lobectomy/Bilobectomy	71
White	Male	2004	Poorly differentiated; Grade III	IA	T1	N0	M0	None/Unknown	No/Unknown	25	Dead	Lobectomy/Bilobectomy	76
White	Female	2004	Moderately differentiated; Grade II	IA	T1	N0	M0	None/Unknown	No/Unknown	133	Alive	Lobectomy/Bilobectomy	56
White	Female	2004	Poorly differentiated; Grade III	IA	T1	N0	M0	None/Unknown	No/Unknown	35	Dead	Lobectomy/Bilobectomy	58
White	Male	2004	Moderately differentiated; Grade II	IA	T1	N0	M0	None/Unknown	No/Unknown	132	Alive	Lobectomy/Bilobectomy	63
White	Male	2004	Unknown	IV	T1	N0	M1	Beam radiation	No/Unknown	9	Dead	No Surgery Of Primary Site	83
White	Male	2004	Poorly differentiated; Grade III	IA	T1	N0	M0	None/Unknown	Yes	14	Dead	Lobectomy/Bilobectomy	74
White	Male	2004	Poorly differentiated; Grade III	IA	T1	N0	M0	Beam radiation	No/Unknown	38	Dead	No Surgery Of Primary Site	85
White	Male	2004	Well differentiated; Grade I	IA	T1	N0	M0	None/Unknown	No/Unknown	0	Dead	Lobectomy/Bilobectomy	77
White	Male	2004	Moderately differentiated; Grade II	IA	T1	N0	M0	None/Unknown	No/Unknown	83	Dead	Lobectomy/Bilobectomy	59
White	Male	2004	Poorly differentiated; Grade III	IB	T2	N0	M0	None/Unknown	Yes	104	Dead	Lobectomy/Bilobectomy	68
White	Female	2004	Moderately differentiated; Grade II	IIIB	T4	N2	M0	None/Unknown	Yes	1	Dead	No Surgery Of Primary Site	64
White	Male	2004	Moderately differentiated; Grade II	IA	T1	N0	M0	None/Unknown	No/Unknown	117	Dead	Lobectomy/Bilobectomy	62
Black	Female	2004	Moderately differentiated; Grade II	IA	T1	N0	M0	None/Unknown	No/Unknown	73	Dead	Lobectomy/Bilobectomy	77
White	Male	2004	Poorly differentiated; Grade III	IA	T1	N0	M0	None/Unknown	No/Unknown	141	Alive	Lobectomy/Bilobectomy	56
White	Male	2004	Moderately differentiated; Grade II	IA	T1	N0	M0	None/Unknown	No/Unknown	138	Alive	Lobectomy/Bilobectomy	65
White	Male	2004	Moderately differentiated; Grade II	IB	T2	N0	M0	None/Unknown	No/Unknown	33	Dead	Radical Pneumonectomy (Complete Pneumonectomy Plus Dissection Of Mediastinal LN)	83
Black	Male	2004	Unknown	IA	T1	N0	M0	None/Unknown	No/Unknown	21	Dead	No Surgery Of Primary Site	72
Black	Female	2004	Moderately differentiated; Grade II	IV	T4	N2	M1	Beam radiation	Yes	2	Dead	No Surgery Of Primary Site	77
Black	Male	2004	Moderately differentiated; Grade II	IA	T1	N0	M0	None/Unknown	No/Unknown	112	Dead	Lobectomy/Bilobectomy	67
White	Female	2004	Moderately differentiated; Grade II	IA	T1	N0	M0	Beam radiation	No/Unknown	20	Dead	No Surgery Of Primary Site	72
White	Female	2004	Unknown	IA	T1	N0	M0	None/Unknown	No/Unknown	13	Dead	No Surgery Of Primary Site	66
White	Female	2004	Poorly differentiated; Grade III	IA	T1	N0	M0	Beam radiation	No/Unknown	15	Dead	No Surgery Of Primary Site	76
White	Male	2004	Moderately differentiated; Grade II	IIB	T2	N1	M0	None/Unknown	No/Unknown	137	Alive	Lobectomy/Bilobectomy	68
Black	Female	2004	Unknown	IIIB	T1	N3	M0	Beam radiation	Yes	10	Dead	No Surgery Of Primary Site	75
White	Male	2004	Poorly differentiated; Grade III	IIIA	T1	N2	M0	Beam radiation	Yes	36	Dead	No Surgery Of Primary Site	59
White	Male	2004	Poorly differentiated; Grade III	IA	T1	N0	M0	None/Unknown	No/Unknown	101	Dead	Partial/Wedge/Segmental Resec., Lingulectomy, Partial Lobectomy, Sleeve Resec.	83
White	Male	2004	Poorly differentiated; Grade III	IA	T1	N0	M0	None/Unknown	No/Unknown	41	Dead	Lobectomy/Bilobectomy	70
White	Male	2004	Moderately differentiated; Grade II	IA	T1	N0	M0	None/Unknown	No/Unknown	59	Dead	Partial/Wedge/Segmental Resec., Lingulectomy, Partial Lobectomy, Sleeve Resec.	83
White	Male	2004	Poorly differentiated; Grade III	IIIA	T1	N2	M0	Beam radiation	No/Unknown	11	Dead	No Surgery Of Primary Site	85
Black	Male	2004	Poorly differentiated; Grade III	IIA	T1	N1	M0	None/Unknown	Yes	10	Dead	Lobectomy/Bilobectomy	68
Black	Male	2004	Poorly differentiated; Grade III	IV	T4	N0	M1	Beam radiation	No/Unknown	5	Dead	No Surgery Of Primary Site	72
White	Male	2004	Poorly differentiated; Grade III	IIA	T1	N1	M0	Beam radiation	No/Unknown	6	Dead	No Surgery Of Primary Site	66
White	Female	2004	Poorly differentiated; Grade III	IV	T4	N2	M1	Beam radiation	No/Unknown	1	Dead	No Surgery Of Primary Site	82
Black	Male	2004	Moderately differentiated; Grade II	IB	T2	N0	M0	None/Unknown	No/Unknown	63	Dead	No Surgery Of Primary Site	80
White	Female	2004	Moderately differentiated; Grade II	IIA	T1	N1	M0	Beam radiation	Yes	126	Alive	Lobectomy/Bilobectomy	43
White	Female	2004	Poorly differentiated; Grade III	IV	T4	N0	M1	None/Unknown	No/Unknown	0	Dead	No Surgery Of Primary Site	80
White	Male	2004	Poorly differentiated; Grade III	IIIA	T1	N2	M0	None/Unknown	Yes	1	Dead	No Surgery Of Primary Site	78
White	Female	2004	Unknown	IIIB	T1	N3	M0	Beam radiation	No/Unknown	9	Dead	No Surgery Of Primary Site	81
White	Male	2004	Poorly differentiated; Grade III	IA	T1	N0	M0	None/Unknown	No/Unknown	7	Dead	Partial/Wedge/Segmental Resec., Lingulectomy, Partial Lobectomy, Sleeve Resec.	85
White	Female	2004	Unknown	IV	T2	N3	M1	None/Unknown	Yes	16	Dead	No Surgery Of Primary Site	54
White	Female	2004	Moderately differentiated; Grade II	IA	T1	N0	M0	None/Unknown	No/Unknown	137	Alive	Partial/Wedge/Segmental Resec., Lingulectomy, Partial Lobectomy, Sleeve Resec.	59
White	Male	2004	Poorly differentiated; Grade III	IIB	T2	N1	M0	None/Unknown	No/Unknown	5	Dead	Partial/Wedge/Segmental Resec., Lingulectomy, Partial Lobectomy, Sleeve Resec.	77
White	Female	2004	Poorly differentiated; Grade III	IV	T2	N2	M1	Beam radiation	Yes	21	Dead	No Surgery Of Primary Site	61
White	Female	2004	Poorly differentiated; Grade III	IA	T1	N0	M0	None/Unknown	No/Unknown	96	Dead	Lobectomy/Bilobectomy	67
White	Female	2004	Poorly differentiated; Grade III	IA	T1	N0	M0	None/Unknown	No/Unknown	78	Dead	Partial/Wedge/Segmental Resec., Lingulectomy, Partial Lobectomy, Sleeve Resec.	61
White	Male	2004	Unknown	IV	T4	N1	M1	None/Unknown	No/Unknown	2	Dead	No Surgery Of Primary Site	70
White	Male	2004	Poorly differentiated; Grade III	IIIA	T1	N2	M0	None/Unknown	No/Unknown	2	Dead	No Surgery Of Primary Site	69
White	Male	2004	Moderately differentiated; Grade II	IA	T1	N0	M0	None/Unknown	No/Unknown	134	Alive	Lobectomy/Bilobectomy	62
White	Female	2004	Moderately differentiated; Grade II	IB	T2	N0	M0	None/Unknown	No/Unknown	134	Alive	Lobectomy/Bilobectomy	68
Black	Male	2004	Poorly differentiated; Grade III	IA	T1	N0	M0	Beam radiation	No/Unknown	0	Dead	No Surgery Of Primary Site	68
White	Female	2004	Unknown	IA	T1	N0	M0	Beam radiation	No/Unknown	46	Dead	No Surgery Of Primary Site	88
White	Female	2004	Poorly differentiated; Grade III	IA	T1	N0	M0	Beam radiation	No/Unknown	24	Dead	No Surgery Of Primary Site	80
White	Male	2004	Unknown	IIIB	T1	N3	M0	Beam radiation	Yes	18	Dead	No Surgery Of Primary Site	52
White	Female	2004	Moderately differentiated; Grade II	IA	T1	N0	M0	None/Unknown	No/Unknown	83	Dead	Lobectomy/Bilobectomy	72
Black	Female	2004	Poorly differentiated; Grade III	IIIB	T4	N0	M0	None/Unknown	No/Unknown	12	Dead	No Surgery Of Primary Site	62
White	Male	2004	Moderately differentiated; Grade II	IA	T1	N0	M0	None/Unknown	No/Unknown	22	Dead	Partial/Wedge/Segmental Resec., Lingulectomy, Partial Lobectomy, Sleeve Resec.	71
White	Male	2004	Unknown	IV	T4	N0	M1	Beam radiation	Yes	54	Dead	No Surgery Of Primary Site	59
White	Male	2004	Poorly differentiated; Grade III	IA	T1	N0	M0	None/Unknown	No/Unknown	16	Dead	No Surgery Of Primary Site	84
White	Male	2004	Moderately differentiated; Grade II	IA	T1	N0	M0	None/Unknown	No/Unknown	47	Dead	Lobectomy/Bilobectomy	72
White	Female	2004	Unknown	IV	T2	N0	M1	None/Unknown	No/Unknown	3	Dead	No Surgery Of Primary Site	70
White	Female	2004	Moderately differentiated; Grade II	IB	T2	N0	M0	None/Unknown	No/Unknown	140	Alive	Lobectomy/Bilobectomy	59
White	Male	2004	Moderately differentiated; Grade II	IA	T1	N0	M0	None/Unknown	No/Unknown	63	Dead	Lobectomy/Bilobectomy	65
White	Male	2004	Unknown	IIIA	T1	N2	M0	Beam radiation	Yes	11	Dead	No Surgery Of Primary Site	78
White	Female	2004	Moderately differentiated; Grade II	IB	T2	N0	M0	None/Unknown	No/Unknown	30	Dead	Lobectomy/Bilobectomy	74
White	Female	2004	Well differentiated; Grade I	IIIA	T1	N2	M0	None/Unknown	Yes	139	Alive	Lobectomy/Bilobectomy	72
White	Male	2004	Poorly differentiated; Grade III	IA	T1	N0	M0	None/Unknown	No/Unknown	18	Dead	Lobectomy/Bilobectomy	80
White	Female	2004	Moderately differentiated; Grade II	IA	T1	N0	M0	None/Unknown	No/Unknown	24	Dead	Lobectomy/Bilobectomy	61
White	Male	2004	Poorly differentiated; Grade III	IIA	T1	N1	M0	None/Unknown	No/Unknown	135	Dead	Lobectomy/Bilobectomy	58
White	Male	2004	Poorly differentiated; Grade III	IA	T1	N0	M0	None/Unknown	No/Unknown	126	Alive	Lobectomy/Bilobectomy	78
White	Male	2004	Moderately differentiated; Grade II	IB	T2	N0	M0	None/Unknown	No/Unknown	10	Dead	Lobectomy/Bilobectomy	78
White	Male	2004	Moderately differentiated; Grade II	IIA	T1	N1	M0	None/Unknown	No/Unknown	53	Dead	Lobectomy/Bilobectomy	73
White	Female	2004	Unknown	IA	T1	N0	M0	None/Unknown	No/Unknown	45	Dead	Lobectomy/Bilobectomy	57
White	Female	2004	Moderately differentiated; Grade II	IA	T1	N0	M0	None/Unknown	No/Unknown	142	Alive	Lobectomy/Bilobectomy	62
Other (American Indian/AK Native, Asian/Pacific Islander)	Male	2004	Moderately differentiated; Grade II	IIB	T3	N0	M0	None/Unknown	No/Unknown	100	Dead	Lobectomy/Bilobectomy	76
White	Female	2004	Unknown	IA	T1	N0	M0	None/Unknown	Yes	66	Dead	No Surgery Of Primary Site	69
White	Male	2004	Poorly differentiated; Grade III	IA	T1	N0	M0	None/Unknown	No/Unknown	97	Dead	Lobectomy/Bilobectomy	57
White	Male	2004	Poorly differentiated; Grade III	IIB	T3	N0	M0	Beam radiation	Yes	134	Alive	Lobectomy/Bilobectomy	45
White	Male	2004	Unknown	IA	T1	N0	M0	None/Unknown	No/Unknown	117	Dead	Lobectomy/Bilobectomy	65
Other (American Indian/AK Native, Asian/Pacific Islander)	Male	2004	Poorly differentiated; Grade III	IA	T1	N0	M0	None/Unknown	No/Unknown	96	Alive	Partial/Wedge/Segmental Resec., Lingulectomy, Partial Lobectomy, Sleeve Resec.	69
White	Male	2004	Unknown	IIIB	T4	N0	M0	None/Unknown	No/Unknown	17	Dead	No Surgery Of Primary Site	59
White	Female	2004	Unknown	IV	T2	N2	M1	Beam radiation	No/Unknown	0	Dead	No Surgery Of Primary Site	68
Black	Male	2004	Poorly differentiated; Grade III	IA	T1	N0	M0	None/Unknown	No/Unknown	52	Dead	Lobectomy/Bilobectomy	55
White	Male	2004	Poorly differentiated; Grade III	IA	T1	N0	M0	None/Unknown	Yes	5	Dead	Lobectomy/Bilobectomy	83
White	Male	2004	Unknown	IIIB	T4	N1	M0	Beam radiation	Yes	103	Dead	No Surgery Of Primary Site	74
White	Female	2004	Unknown	IIIB	T1	N3	M0	None/Unknown	No/Unknown	6	Dead	No Surgery Of Primary Site	79
White	Female	2004	Poorly differentiated; Grade III	IB	T2	N0	M0	None/Unknown	No/Unknown	140	Alive	Lobectomy/Bilobectomy	72
Black	Male	2004	Moderately differentiated; Grade II	IIIA	T1	N2	M0	None/Unknown	Yes	13	Dead	No Surgery Of Primary Site	50
White	Male	2004	Unknown	IB	T2	N0	M0	Beam radiation	No/Unknown	18	Dead	No Surgery Of Primary Site	63
White	Male	2004	Unknown	IIIB	T4	N1	M0	None/Unknown	No/Unknown	3	Dead	No Surgery Of Primary Site	85
White	Female	2004	Moderately differentiated; Grade II	IA	T1	N0	M0	None/Unknown	No/Unknown	5	Dead	Lobectomy/Bilobectomy	73
White	Female	2004	Moderately differentiated; Grade II	IA	T1	N0	M0	None/Unknown	No/Unknown	15	Dead	Complete/Total/Standard Pneumonectomy; Pneumonectomy, Nos	79
White	Female	2004	Well differentiated; Grade I	IA	T1	N0	M0	None/Unknown	No/Unknown	139	Alive	Lobectomy/Bilobectomy	69
White	Male	2004	Unknown	IV	T4	N2	M1	None/Unknown	No/Unknown	0	Dead	No Surgery Of Primary Site	80
White	Male	2004	Unknown	IV	T1	N2	M1	None/Unknown	Yes	2	Dead	No Surgery Of Primary Site	70
White	Male	2004	Unknown	IV	T4	N2	M1	Beam radiation	No/Unknown	12	Dead	No Surgery Of Primary Site	73
White	Male	2004	Unknown	IB	T2	N0	M0	Beam radiation	No/Unknown	74	Dead	No Surgery Of Primary Site	75
White	Male	2004	Unknown	IIIB	T4	N0	M0	None/Unknown	Yes	102	Dead	No Surgery Of Primary Site	78
White	Female	2004	Unknown	IV	T2	N2	M1	None/Unknown	Yes	11	Dead	No Surgery Of Primary Site	75
White	Female	2004	Well differentiated; Grade I	IA	T1	N0	M0	None/Unknown	No/Unknown	70	Dead	No Surgery Of Primary Site	78
Black	Male	2004	Unknown	IIA	T1	N1	M0	Beam radiation	No/Unknown	56	Dead	No Surgery Of Primary Site	55
Black	Male	2004	Poorly differentiated; Grade III	IA	T1	N0	M0	None/Unknown	No/Unknown	2	Dead	Lobectomy/Bilobectomy	70
White	Male	2004	Moderately differentiated; Grade II	IIA	T1	N1	M0	None/Unknown	Yes	139	Alive	Lobectomy/Bilobectomy	62
White	Male	2004	Unknown	IIIA	T1	N2	M0	Refused	No/Unknown	9	Dead	No Surgery Of Primary Site	67
White	Female	2004	Unknown	IV	T4	N2	M1	Beam radiation	Yes	15	Dead	No Surgery Of Primary Site	85
White	Female	2004	Poorly differentiated; Grade III	IA	T1	N0	M0	None/Unknown	No/Unknown	91	Dead	Lobectomy/Bilobectomy	64
White	Male	2004	Moderately differentiated; Grade II	IIIB	T4	N0	M0	None/Unknown	No/Unknown	0	Dead	No Surgery Of Primary Site	79
White	Male	2004	Poorly differentiated; Grade III	IA	T1	N0	M0	None/Unknown	No/Unknown	123	Dead	Lobectomy/Bilobectomy	80
White	Female	2004	Moderately differentiated; Grade II	IA	T1	N0	M0	None/Unknown	No/Unknown	140	Alive	Lobectomy/Bilobectomy	53
White	Male	2004	Poorly differentiated; Grade III	IA	T1	N0	M0	Beam radiation	No/Unknown	5	Dead	No Surgery Of Primary Site	86
White	Male	2004	Poorly differentiated; Grade III	IA	T1	N0	M0	None/Unknown	No/Unknown	59	Dead	Lobectomy/Bilobectomy	71
White	Female	2004	Poorly differentiated; Grade III	IA	T1	N0	M0	None/Unknown	No/Unknown	132	Alive	Lobectomy/Bilobectomy	67
Other (American Indian/AK Native, Asian/Pacific Islander)	Female	2004	Unknown	IIIA	T1	N2	M0	Beam radiation	Yes	59	Dead	No Surgery Of Primary Site	59
White	Female	2004	Moderately differentiated; Grade II	IA	T1	N0	M0	None/Unknown	No/Unknown	35	Dead	Lobectomy/Bilobectomy	75
White	Male	2004	Moderately differentiated; Grade II	IA	T1	N0	M0	None/Unknown	No/Unknown	23	Dead	Lobectomy/Bilobectomy	76
White	Male	2004	Poorly differentiated; Grade III	IV	T2	N0	M1	None/Unknown	No/Unknown	55	Dead	Lobectomy/Bilobectomy	76
White	Male	2004	Moderately differentiated; Grade II	IV	T1	N0	M1	None/Unknown	Yes	8	Dead	No Surgery Of Primary Site	79
White	Male	2004	Poorly differentiated; Grade III	IIIA	T1	N2	M0	Beam radiation	Yes	1	Dead	No Surgery Of Primary Site	65
White	Male	2004	Poorly differentiated; Grade III	IB	T2	N0	M0	None/Unknown	No/Unknown	76	Dead	Lobectomy/Bilobectomy	60
White	Male	2004	Moderately differentiated; Grade II	IA	T1	N0	M0	None/Unknown	No/Unknown	39	Dead	Lobectomy/Bilobectomy	72
White	Male	2004	Poorly differentiated; Grade III	IB	T2	N0	M0	None/Unknown	No/Unknown	140	Alive	Lobectomy/Bilobectomy	82
Other (American Indian/AK Native, Asian/Pacific Islander)	Male	2004	Unknown	IA	T1	N0	M0	None/Unknown	No/Unknown	9	Dead	No Surgery Of Primary Site	87
White	Male	2004	Moderately differentiated; Grade II	IIA	T1	N1	M0	Beam radiation	Yes	11	Dead	No Surgery Of Primary Site	69
Other (American Indian/AK Native, Asian/Pacific Islander)	Male	2004	Unknown	IIIA	T1	N2	M0	None/Unknown	Yes	52	Dead	No Surgery Of Primary Site	68
White	Female	2004	Moderately differentiated; Grade II	IA	T1	N0	M0	None/Unknown	No/Unknown	135	Alive	Lobectomy/Bilobectomy	72
White	Male	2004	Unknown	IV	T1	N0	M1	None/Unknown	Yes	38	Dead	No Surgery Of Primary Site	76
White	Male	2004	Poorly differentiated; Grade III	IV	T1	N2	M1	None/Unknown	Yes	2	Dead	No Surgery Of Primary Site	76
White	Female	2004	Poorly differentiated; Grade III	IV	T2	N2	M1	Beam radiation	Yes	7	Dead	No Surgery Of Primary Site	55
White	Male	2004	Moderately differentiated; Grade II	IV	T1	N2	M1	Beam radiation	Yes	5	Dead	Local Surgical Excision Or Destruction Of Lesion	81
White	Male	2004	Moderately differentiated; Grade II	IB	T2	N0	M0	None/Unknown	No/Unknown	2	Dead	Lobectomy/Bilobectomy	69
Black	Male	2004	Moderately differentiated; Grade II	IB	T2	N0	M0	None/Unknown	No/Unknown	126	Dead	Lobectomy/Bilobectomy	64
White	Male	2004	Poorly differentiated; Grade III	IV	T2	N2	M1	Beam radiation	No/Unknown	10	Dead	No Surgery Of Primary Site	49
White	Male	2004	Poorly differentiated; Grade III	IA	T1	N0	M0	None/Unknown	No/Unknown	8	Dead	Lobectomy/Bilobectomy	78
Black	Male	2004	Unknown	IV	T2	N0	M1	Beam radiation	Yes	8	Dead	No Surgery Of Primary Site	66
White	Male	2004	Moderately differentiated; Grade II	IB	T2	N0	M0	None/Unknown	No/Unknown	13	Dead	Partial/Wedge/Segmental Resec., Lingulectomy, Partial Lobectomy, Sleeve Resec.	82
Other (American Indian/AK Native, Asian/Pacific Islander)	Female	2004	Moderately differentiated; Grade II	IA	T1	N0	M0	Beam radiation	No/Unknown	41	Dead	No Surgery Of Primary Site	80
White	Male	2004	Poorly differentiated; Grade III	IA	T1	N0	M0	Beam radiation	Yes	75	Dead	No Surgery Of Primary Site	81
White	Male	2004	Moderately differentiated; Grade II	IA	T1	N0	M0	None/Unknown	No/Unknown	5	Dead	Lobectomy/Bilobectomy	80
White	Male	2004	Undifferentiated; anaplastic; Grade IV	IIA	T1	N1	M0	None/Unknown	No/Unknown	6	Dead	Lobectomy/Bilobectomy	80
White	Male	2004	Unknown	IV	T1	N2	M1	Beam radiation	Yes	4	Dead	No Surgery Of Primary Site	78
White	Male	2004	Unknown	IV	T1	N3	M1	Beam radiation	No/Unknown	9	Dead	No Surgery Of Primary Site	69
Other (American Indian/AK Native, Asian/Pacific Islander)	Male	2004	Unknown	IIIB	T2	N3	M0	Beam radiation	Yes	13	Dead	Local Surgical Excision Or Destruction Of Lesion	56
White	Male	2004	Unknown	IV	T1	N0	M1	Beam radiation	Yes	11	Dead	No Surgery Of Primary Site	70
White	Male	2004	Moderately differentiated; Grade II	IA	T1	N0	M0	None/Unknown	No/Unknown	8	Dead	Partial/Wedge/Segmental Resec., Lingulectomy, Partial Lobectomy, Sleeve Resec.	76
White	Female	2004	Poorly differentiated; Grade III	IV	T3	N0	M1	None/Unknown	No/Unknown	1	Dead	No Surgery Of Primary Site	84
White	Female	2004	Poorly differentiated; Grade III	IA	T1	N0	M0	None/Unknown	No/Unknown	136	Alive	Lobectomy/Bilobectomy	47
White	Male	2004	Moderately differentiated; Grade II	IA	T1	N0	M0	None/Unknown	No/Unknown	73	Dead	Partial/Wedge/Segmental Resec., Lingulectomy, Partial Lobectomy, Sleeve Resec.	67
White	Male	2004	Moderately differentiated; Grade II	IIA	T1	N1	M0	None/Unknown	No/Unknown	31	Dead	Lobectomy/Bilobectomy	68
Black	Male	2004	Poorly differentiated; Grade III	IA	T1	N0	M0	None/Unknown	No/Unknown	5	Dead	Lobectomy/Bilobectomy	60
White	Male	2004	Unknown	IV	T4	N2	M1	Beam radiation	No/Unknown	0	Dead	No Surgery Of Primary Site	74
White	Male	2004	Unknown	IIA	T1	N1	M0	Beam radiation	No/Unknown	7	Dead	No Surgery Of Primary Site	81
White	Male	2004	Unknown	IV	T1	N0	M1	Beam radiation	No/Unknown	56	Dead	No Surgery Of Primary Site	78
White	Male	2004	Unknown	IIIA	T1	N2	M0	Beam radiation	Yes	33	Dead	No Surgery Of Primary Site	58
White	Male	2004	Moderately differentiated; Grade II	IIIB	T4	N0	M0	None/Unknown	No/Unknown	0	Dead	Lobectomy/Bilobectomy	78
White	Male	2004	Poorly differentiated; Grade III	IB	T2	N0	M0	None/Unknown	No/Unknown	66	Dead	Lobectomy/Bilobectomy	84
White	Male	2004	Unknown	IA	T1	N0	M0	None/Unknown	No/Unknown	31	Dead	No Surgery Of Primary Site	67
White	Male	2004	Moderately differentiated; Grade II	IIIA	T3	N2	M0	Beam radiation	Yes	19	Dead	No Surgery Of Primary Site	57
White	Female	2004	Poorly differentiated; Grade III	IIA	T1	N1	M0	Beam radiation	Yes	5	Dead	No Surgery Of Primary Site	77
White	Male	2004	Well differentiated; Grade I	IA	T1	N0	M0	None/Unknown	No/Unknown	104	Dead	Lobectomy/Bilobectomy	75
White	Female	2004	Poorly differentiated; Grade III	IV	T4	N0	M1	None/Unknown	Yes	0	Dead	No Surgery Of Primary Site	69
White	Female	2004	Poorly differentiated; Grade III	IA	T1	N0	M0	None/Unknown	No/Unknown	35	Dead	Lobectomy/Bilobectomy	65
White	Male	2004	Unknown	IA	T1	N0	M0	None/Unknown	No/Unknown	0	Alive	Lobectomy/Bilobectomy	81
Black	Male	2004	Unknown	IIA	T1	N1	M0	Beam radiation	Yes	27	Dead	No Surgery Of Primary Site	58
White	Male	2004	Moderately differentiated; Grade II	IIIA	T1	N2	M0	None/Unknown	No/Unknown	138	Dead	Lobectomy/Bilobectomy	61
White	Male	2004	Poorly differentiated; Grade III	IA	T1	N0	M0	None/Unknown	No/Unknown	56	Dead	Complete/Total/Standard Pneumonectomy; Pneumonectomy, Nos	67
White	Female	2004	Unknown	IV	T4	N3	M1	None/Unknown	No/Unknown	7	Dead	No Surgery Of Primary Site	84
White	Female	2004	Moderately differentiated; Grade II	IA	T1	N0	M0	None/Unknown	No/Unknown	117	Dead	Lobectomy/Bilobectomy	70
White	Male	2004	Moderately differentiated; Grade II	IA	T1	N0	M0	Beam radiation	No/Unknown	15	Dead	No Surgery Of Primary Site	80
White	Male	2004	Moderately differentiated; Grade II	IIIB	T4	N1	M0	Beam radiation	Yes	17	Dead	No Surgery Of Primary Site	71
White	Male	2004	Poorly differentiated; Grade III	IIA	T1	N1	M0	Beam radiation	Yes	23	Dead	Lobectomy/Bilobectomy	58
White	Male	2004	Moderately differentiated; Grade II	IIA	T1	N1	M0	None/Unknown	No/Unknown	56	Dead	Lobectomy/Bilobectomy	74
White	Male	2004	Poorly differentiated; Grade III	IB	T2	N0	M0	None/Unknown	No/Unknown	74	Dead	Partial/Wedge/Segmental Resec., Lingulectomy, Partial Lobectomy, Sleeve Resec.	75
Black	Female	2004	Poorly differentiated; Grade III	IA	T1	N0	M0	None/Unknown	No/Unknown	7	Dead	Lobectomy/Bilobectomy	60
Other (American Indian/AK Native, Asian/Pacific Islander)	Male	2004	Moderately differentiated; Grade II	IIIB	T4	N0	M0	Beam radiation	No/Unknown	10	Dead	No Surgery Of Primary Site	74
White	Female	2004	Moderately differentiated; Grade II	IV	T2	N0	M1	None/Unknown	No/Unknown	107	Dead	Lobectomy/Bilobectomy	68
White	Male	2004	Unknown	IV	T4	N3	M1	None/Unknown	Yes	3	Dead	No Surgery Of Primary Site	66
White	Male	2004	Unknown	IB	T2	N0	M0	None/Unknown	No/Unknown	32	Dead	Lobectomy/Bilobectomy	80
White	Female	2004	Poorly differentiated; Grade III	IA	T1	N0	M0	None/Unknown	No/Unknown	4	Dead	Lobectomy/Bilobectomy	82
White	Female	2004	Moderately differentiated; Grade II	IB	T2	N0	M0	None/Unknown	No/Unknown	134	Alive	Lobectomy/Bilobectomy	76
White	Female	2004	Poorly differentiated; Grade III	IIIA	T1	N2	M0	None/Unknown	No/Unknown	10	Dead	Lobectomy/Bilobectomy	78
White	Male	2004	Moderately differentiated; Grade II	IA	T1	N0	M0	Beam radiation	No/Unknown	12	Dead	Partial/Wedge/Segmental Resec., Lingulectomy, Partial Lobectomy, Sleeve Resec.	78
White	Male	2004	Moderately differentiated; Grade II	IA	T1	N0	M0	None/Unknown	No/Unknown	44	Dead	Lobectomy/Bilobectomy	78
White	Male	2004	Poorly differentiated; Grade III	IB	T2	N0	M0	None/Unknown	No/Unknown	54	Dead	Lobectomy/Bilobectomy	62
White	Male	2004	Poorly differentiated; Grade III	IA	T1	N0	M0	None/Unknown	No/Unknown	142	Alive	Lobectomy/Bilobectomy	66
White	Female	2004	Poorly differentiated; Grade III	IIIA	T1	N2	M0	None/Unknown	No/Unknown	118	Dead	Lobectomy/Bilobectomy	70
White	Female	2004	Unknown	IV	T1	N3	M1	Beam radiation	Yes	13	Dead	No Surgery Of Primary Site	72
White	Male	2004	Moderately differentiated; Grade II	IA	T1	N0	M0	None/Unknown	No/Unknown	130	Dead	Lobectomy/Bilobectomy	63
White	Male	2004	Poorly differentiated; Grade III	IIB	T2	N1	M0	Beam radiation	Yes	22	Dead	No Surgery Of Primary Site	60
White	Male	2004	Unknown	IIIA	T1	N2	M0	None/Unknown	Yes	2	Dead	No Surgery Of Primary Site	50
White	Female	2004	Moderately differentiated; Grade II	IA	T1	N0	M0	Beam radiation	No/Unknown	13	Dead	No Surgery Of Primary Site	76
White	Female	2004	Unknown	IIIB	T4	N2	M0	Beam radiation	Yes	2	Dead	No Surgery Of Primary Site	74
White	Female	2004	Unknown	IIA	T1	N1	M0	Beam radiation	Yes	83	Dead	Lobectomy/Bilobectomy	74
Black	Male	2004	Moderately differentiated; Grade II	IV	T4	N3	M1	None/Unknown	Yes	0	Dead	No Surgery Of Primary Site	66
White	Female	2004	Moderately differentiated; Grade II	IB	T2	N0	M0	None/Unknown	Yes	133	Alive	Partial/Wedge/Segmental Resec., Lingulectomy, Partial Lobectomy, Sleeve Resec.	44
White	Female	2004	Moderately differentiated; Grade II	IA	T1	N0	M0	None/Unknown	Yes	92	Dead	Partial/Wedge/Segmental Resec., Lingulectomy, Partial Lobectomy, Sleeve Resec.	71
White	Female	2004	Poorly differentiated; Grade III	IIA	T1	N1	M0	None/Unknown	Yes	132	Alive	Lobectomy/Bilobectomy	49
Black	Male	2004	Poorly differentiated; Grade III	IV	T4	N2	M1	None/Unknown	No/Unknown	20	Dead	No Surgery Of Primary Site	88
White	Male	2004	Well differentiated; Grade I	IA	T1	N0	M0	None/Unknown	Yes	8	Dead	No Surgery Of Primary Site	63
White	Female	2004	Unknown	IV	T4	N0	M1	Beam radiation	Yes	8	Dead	No Surgery Of Primary Site	87
White	Male	2004	Poorly differentiated; Grade III	IA	T1	N0	M0	None/Unknown	No/Unknown	17	Dead	Partial/Wedge/Segmental Resec., Lingulectomy, Partial Lobectomy, Sleeve Resec.	62
White	Male	2004	Moderately differentiated; Grade II	IA	T1	N0	M0	None/Unknown	No/Unknown	62	Dead	Lobectomy/Bilobectomy	73
White	Male	2004	Unknown	IV	T1	N0	M1	Beam radiation	Yes	19	Dead	Lobectomy/Bilobectomy	77
Other (American Indian/AK Native, Asian/Pacific Islander)	Male	2004	Moderately differentiated; Grade II	IA	T1	N0	M0	None/Unknown	No/Unknown	10	Dead	Lobectomy/Bilobectomy	76
White	Female	2004	Poorly differentiated; Grade III	IIIB	T1	N3	M0	Beam radiation	No/Unknown	45	Dead	No Surgery Of Primary Site	71
White	Female	2004	Unknown	IIIB	T4	N2	M0	None/Unknown	Yes	19	Dead	No Surgery Of Primary Site	65
Other (American Indian/AK Native, Asian/Pacific Islander)	Male	2004	Moderately differentiated; Grade II	IA	T1	N0	M0	None/Unknown	No/Unknown	139	Alive	Partial/Wedge/Segmental Resec., Lingulectomy, Partial Lobectomy, Sleeve Resec.	62
White	Male	2004	Moderately differentiated; Grade II	IA	T1	N0	M0	None/Unknown	No/Unknown	29	Dead	Lobectomy/Bilobectomy	60
White	Male	2004	Moderately differentiated; Grade II	IA	T1	N0	M0	None/Unknown	No/Unknown	112	Dead	Lobectomy/Bilobectomy	83
White	Male	2004	Poorly differentiated; Grade III	IIIB	T4	N0	M0	None/Unknown	No/Unknown	3	Dead	Partial/Wedge/Segmental Resec., Lingulectomy, Partial Lobectomy, Sleeve Resec.	73
White	Female	2004	Poorly differentiated; Grade III	IIIB	T4	N2	M0	None/Unknown	No/Unknown	9	Dead	No Surgery Of Primary Site	42
White	Male	2004	Poorly differentiated; Grade III	IIA	T1	N1	M0	None/Unknown	No/Unknown	77	Dead	Lobectomy/Bilobectomy	63
White	Male	2004	Unknown	IV	T1	N3	M1	Beam radiation	No/Unknown	12	Dead	No Surgery Of Primary Site	67
White	Female	2004	Unknown	IA	T1	N0	M0	Beam radiation	No/Unknown	22	Dead	No Surgery Of Primary Site	67
White	Female	2004	Unknown	IIIA	T1	N2	M0	Beam radiation	Yes	68	Dead	No Surgery Of Primary Site	74
White	Male	2004	Moderately differentiated; Grade II	IA	T1	N0	M0	None/Unknown	No/Unknown	110	Dead	Lobectomy/Bilobectomy	65
White	Male	2004	Unknown	IIIA	T1	N2	M0	Beam radiation	Yes	38	Dead	No Surgery Of Primary Site	61
White	Male	2004	Unknown	IIA	T1	N1	M0	None/Unknown	No/Unknown	0	Dead	No Surgery Of Primary Site	62
White	Male	2004	Poorly differentiated; Grade III	IIB	T2	N1	M0	Beam radiation	No/Unknown	142	Alive	Lobectomy/Bilobectomy	72
White	Male	2004	Poorly differentiated; Grade III	IIA	T1	N1	M0	None/Unknown	No/Unknown	134	Alive	Lobectomy/Bilobectomy	75
White	Female	2004	Poorly differentiated; Grade III	IIIA	T1	N2	M0	None/Unknown	No/Unknown	129	Dead	Lobectomy/Bilobectomy	73
White	Male	2004	Poorly differentiated; Grade III	IB	T2	N0	M0	Beam radiation	Yes	138	Alive	Lobectomy/Bilobectomy	48
White	Male	2004	Poorly differentiated; Grade III	IV	T4	N2	M1	None/Unknown	No/Unknown	1	Dead	No Surgery Of Primary Site	74
White	Male	2004	Moderately differentiated; Grade II	IIA	T1	N1	M0	None/Unknown	No/Unknown	34	Dead	Lobectomy/Bilobectomy	56
White	Female	2004	Poorly differentiated; Grade III	IA	T1	N0	M0	None/Unknown	No/Unknown	13	Dead	Partial/Wedge/Segmental Resec., Lingulectomy, Partial Lobectomy, Sleeve Resec.	78
Black	Female	2004	Moderately differentiated; Grade II	IB	T2	N0	M0	None/Unknown	No/Unknown	14	Dead	Partial/Wedge/Segmental Resec., Lingulectomy, Partial Lobectomy, Sleeve Resec.	74
White	Female	2004	Unknown	IA	T1	N0	M0	Beam radiation	No/Unknown	45	Dead	No Surgery Of Primary Site	87
Black	Male	2004	Unknown	IV	T1	N0	M1	Beam radiation	No/Unknown	6	Dead	No Surgery Of Primary Site	44
White	Male	2004	Moderately differentiated; Grade II	IA	T1	N0	M0	None/Unknown	No/Unknown	16	Dead	Partial/Wedge/Segmental Resec., Lingulectomy, Partial Lobectomy, Sleeve Resec.	69
Black	Female	2004	Poorly differentiated; Grade III	IA	T1	N0	M0	None/Unknown	No/Unknown	78	Dead	Lobectomy/Bilobectomy	65
White	Female	2004	Unknown	IA	T1	N0	M0	Beam radiation	No/Unknown	30	Dead	No Surgery Of Primary Site	84
Black	Male	2004	Unknown	IIIB	T4	N2	M0	None/Unknown	No/Unknown	34	Dead	No Surgery Of Primary Site	82
White	Male	2004	Moderately differentiated; Grade II	IIIA	T1	N2	M0	None/Unknown	Yes	132	Alive	Lobectomy/Bilobectomy	58
White	Male	2004	Poorly differentiated; Grade III	IB	T2	N0	M0	None/Unknown	No/Unknown	62	Dead	Lobectomy/Bilobectomy	61
White	Male	2004	Poorly differentiated; Grade III	IB	T2	N0	M0	None/Unknown	No/Unknown	20	Dead	Lobectomy/Bilobectomy	78
White	Female	2004	Moderately differentiated; Grade II	IV	T1	N2	M1	Beam radiation	Yes	6	Dead	No Surgery Of Primary Site	77
White	Female	2004	Poorly differentiated; Grade III	IA	T1	N0	M0	None/Unknown	No/Unknown	51	Dead	Lobectomy/Bilobectomy	55
White	Female	2004	Unknown	IV	T1	N0	M1	None/Unknown	No/Unknown	0	Dead	No Surgery Of Primary Site	79
White	Male	2004	Unknown	IIIB	T4	N0	M0	None/Unknown	Yes	7	Dead	No Surgery Of Primary Site	66
White	Male	2004	Unknown	IA	T1	N0	M0	None/Unknown	No/Unknown	6	Dead	No Surgery Of Primary Site	58
White	Female	2004	Moderately differentiated; Grade II	IIIA	T1	N2	M0	None/Unknown	No/Unknown	137	Alive	Lobectomy/Bilobectomy	63
White	Male	2004	Poorly differentiated; Grade III	IA	T1	N0	M0	None/Unknown	No/Unknown	40	Dead	Lobectomy/Bilobectomy	74
White	Male	2004	Poorly differentiated; Grade III	IA	T1	N0	M0	None/Unknown	No/Unknown	45	Dead	Lobectomy/Bilobectomy	61
White	Female	2004	Poorly differentiated; Grade III	IA	T1	N0	M0	None/Unknown	No/Unknown	43	Dead	Lobectomy/Bilobectomy	68
White	Female	2004	Undifferentiated; anaplastic; Grade IV	IIIB	T4	N2	M0	None/Unknown	Yes	3	Dead	No Surgery Of Primary Site	78
White	Female	2004	Poorly differentiated; Grade III	IIIA	T2	N2	M0	None/Unknown	No/Unknown	26	Dead	Lobectomy/Bilobectomy	68
White	Male	2004	Moderately differentiated; Grade II	IA	T1	N0	M0	None/Unknown	No/Unknown	3	Dead	Partial/Wedge/Segmental Resec., Lingulectomy, Partial Lobectomy, Sleeve Resec.	85
White	Male	2004	Poorly differentiated; Grade III	IB	T2	N0	M0	None/Unknown	No/Unknown	7	Dead	Lobectomy/Bilobectomy	69
White	Male	2004	Well differentiated; Grade I	IV	T1	N0	M1	None/Unknown	Yes	9	Dead	No Surgery Of Primary Site	72
White	Male	2004	Poorly differentiated; Grade III	IB	T2	N0	M0	None/Unknown	No/Unknown	42	Dead	Lobectomy/Bilobectomy	84
White	Female	2004	Unknown	IA	T1	N0	M0	Beam radiation	No/Unknown	6	Dead	No Surgery Of Primary Site	76
White	Male	2004	Poorly differentiated; Grade III	IA	T1	N0	M0	None/Unknown	No/Unknown	141	Alive	Lobectomy/Bilobectomy	61
White	Male	2004	Poorly differentiated; Grade III	IA	T1	N0	M0	None/Unknown	No/Unknown	81	Dead	Lobectomy/Bilobectomy	67
White	Male	2004	Poorly differentiated; Grade III	IA	T1	N0	M0	None/Unknown	No/Unknown	131	Dead	Lobectomy/Bilobectomy	65
White	Male	2004	Poorly differentiated; Grade III	IIIA	T1	N2	M0	Beam radiation	Yes	17	Dead	Partial/Wedge/Segmental Resec., Lingulectomy, Partial Lobectomy, Sleeve Resec.	70
White	Male	2004	Poorly differentiated; Grade III	IIA	T1	N1	M0	None/Unknown	No/Unknown	40	Dead	Radical Pneumonectomy (Complete Pneumonectomy Plus Dissection Of Mediastinal LN)	61
White	Male	2004	Poorly differentiated; Grade III	IIIB	T4	N0	M0	Beam radiation	No/Unknown	16	Dead	No Surgery Of Primary Site	73
White	Male	2004	Poorly differentiated; Grade III	IIIB	T4	N0	M0	Beam radiation	No/Unknown	32	Dead	Partial/Wedge/Segmental Resec., Lingulectomy, Partial Lobectomy, Sleeve Resec.	84
White	Female	2004	Unknown	IIIB	T4	N1	M0	Beam radiation	No/Unknown	2	Dead	No Surgery Of Primary Site	69
White	Male	2004	Poorly differentiated; Grade III	IA	T1	N0	M0	None/Unknown	No/Unknown	52	Dead	Lobectomy/Bilobectomy	66
White	Male	2004	Unknown	IIIB	T4	N0	M0	Beam radiation	No/Unknown	9	Dead	No Surgery Of Primary Site	79
White	Male	2004	Poorly differentiated; Grade III	IIIA	T1	N2	M0	None/Unknown	No/Unknown	9	Dead	Lobectomy/Bilobectomy	73
White	Female	2004	Unknown	IV	T3	N0	M1	None/Unknown	Yes	45	Dead	No Surgery Of Primary Site	65
Black	Male	2004	Unknown	IIB	T3	N0	M0	Beam radiation	Yes	21	Dead	No Surgery Of Primary Site	68
White	Female	2004	Poorly differentiated; Grade III	IIIB	T4	N0	M0	None/Unknown	No/Unknown	0	Dead	No Surgery Of Primary Site	76
White	Male	2004	Unknown	IV	T4	N2	M1	None/Unknown	No/Unknown	Unknown	Dead	No Surgery Of Primary Site	60
White	Male	2004	Unknown	IV	T4	N1	M1	None/Unknown	Yes	5	Dead	No Surgery Of Primary Site	77
White	Male	2004	Poorly differentiated; Grade III	IIA	T1	N1	M0	None/Unknown	No/Unknown	133	Dead	Lobectomy/Bilobectomy	81
White	Male	2004	Unknown	IA	T1	N0	M0	None/Unknown	No/Unknown	1	Dead	No Surgery Of Primary Site	84
White	Female	2004	Moderately differentiated; Grade II	IIIB	T4	N1	M0	None/Unknown	No/Unknown	138	Dead	Lobectomy/Bilobectomy	60
White	Female	2004	Moderately differentiated; Grade II	IB	T2	N0	M0	None/Unknown	No/Unknown	2	Dead	No Surgery Of Primary Site	59
White	Male	2004	Poorly differentiated; Grade III	IA	T1	N0	M0	None/Unknown	No/Unknown	21	Dead	Lobectomy/Bilobectomy	81
Other (American Indian/AK Native, Asian/Pacific Islander)	Male	2004	Unknown	IV	T4	N3	M1	None/Unknown	No/Unknown	10	Dead	No Surgery Of Primary Site	69
Other (American Indian/AK Native, Asian/Pacific Islander)	Male	2004	Unknown	IIIB	T2	N3	M0	Beam radiation	Yes	14	Dead	No Surgery Of Primary Site	55
White	Female	2004	Poorly differentiated; Grade III	IA	T1	N0	M0	None/Unknown	Yes	137	Alive	Lobectomy/Bilobectomy	57
White	Male	2004	Unknown	IA	T1	N0	M0	Beam radiation	Yes	15	Dead	No Surgery Of Primary Site	73
Black	Female	2004	Unknown	IA	T1	N0	M0	Beam radiation	Yes	18	Dead	No Surgery Of Primary Site	72
White	Male	2004	Moderately differentiated; Grade II	IV	T1	N0	M1	Beam radiation	Yes	13	Dead	No Surgery Of Primary Site	72
White	Male	2004	Poorly differentiated; Grade III	IA	T1	N0	M0	None/Unknown	No/Unknown	0	Dead	No Surgery Of Primary Site	83
White	Male	2004	Moderately differentiated; Grade II	IV	T4	N2	M1	Beam radiation	Yes	17	Dead	No Surgery Of Primary Site	83
White	Male	2004	Poorly differentiated; Grade III	IV	T2	N2	M1	Beam radiation	No/Unknown	1	Dead	No Surgery Of Primary Site	68
White	Female	2004	Unknown	IIIA	T1	N2	M0	Beam radiation	No/Unknown	4	Dead	No Surgery Of Primary Site	74
White	Male	2004	Unknown	IV	T4	N2	M1	None/Unknown	Yes	9	Dead	No Surgery Of Primary Site	72
Black	Male	2004	Unknown	IV	T3	N0	M1	None/Unknown	No/Unknown	31	Dead	No Surgery Of Primary Site	53
White	Female	2004	Poorly differentiated; Grade III	IIIA	T1	N2	M0	Beam radiation	No/Unknown	19	Dead	No Surgery Of Primary Site	80
White	Male	2004	Moderately differentiated; Grade II	IIA	T1	N1	M0	None/Unknown	No/Unknown	88	Dead	Radical Pneumonectomy (Complete Pneumonectomy Plus Dissection Of Mediastinal LN)	74
White	Male	2004	Unknown	IA	T1	N0	M0	None/Unknown	No/Unknown	4	Dead	No Surgery Of Primary Site	78
White	Male	2004	Moderately differentiated; Grade II	IV	T2	N0	M1	None/Unknown	No/Unknown	1	Dead	No Surgery Of Primary Site	76
White	Female	2004	Poorly differentiated; Grade III	IA	T1	N0	M0	Beam radiation	No/Unknown	6	Dead	No Surgery Of Primary Site	70
White	Male	2004	Moderately differentiated; Grade II	IV	T1	N1	M1	Beam radiation	Yes	11	Dead	No Surgery Of Primary Site	76
White	Female	2004	Poorly differentiated; Grade III	IIIA	T1	N2	M0	None/Unknown	Yes	44	Dead	No Surgery Of Primary Site	77
White	Female	2004	Moderately differentiated; Grade II	IA	T1	N0	M0	None/Unknown	No/Unknown	123	Dead	No Surgery Of Primary Site	73
White	Male	2004	Moderately differentiated; Grade II	IA	T1	N0	M0	None/Unknown	No/Unknown	69	Dead	Lobectomy/Bilobectomy	67
Black	Female	2004	Poorly differentiated; Grade III	IIB	T2	N1	M0	None/Unknown	No/Unknown	18	Dead	Lobectomy/Bilobectomy	93
White	Male	2004	Moderately differentiated; Grade II	IA	T1	N0	M0	None/Unknown	No/Unknown	3	Dead	No Surgery Of Primary Site	74
Black	Male	2004	Unknown	IA	T1	N0	M0	Beam radiation	No/Unknown	8	Dead	No Surgery Of Primary Site	76
White	Male	2004	Poorly differentiated; Grade III	IB	T2	N0	M0	None/Unknown	Yes	16	Dead	Lobectomy/Bilobectomy	62
White	Male	2004	Poorly differentiated; Grade III	IB	T2	N0	M0	None/Unknown	No/Unknown	10	Dead	Lobectomy/Bilobectomy	83
White	Female	2004	Unknown	IIB	T2	N1	M0	None/Unknown	No/Unknown	12	Dead	Complete/Total/Standard Pneumonectomy; Pneumonectomy, Nos	51
White	Female	2004	Poorly differentiated; Grade III	IIIB	T4	N2	M0	Beam radiation	Yes	0	Dead	No Surgery Of Primary Site	76
White	Male	2004	Moderately differentiated; Grade II	IV	T4	N0	M1	Beam radiation	No/Unknown	11	Dead	No Surgery Of Primary Site	70
Black	Female	2004	Unknown	IV	T4	N0	M1	Beam radiation	No/Unknown	7	Dead	No Surgery Of Primary Site	73
White	Female	2004	Unknown	IV	T4	N2	M1	None/Unknown	Yes	1	Dead	No Surgery Of Primary Site	68
White	Male	2004	Unknown	IV	T1	N0	M1	Beam radiation	Yes	0	Dead	No Surgery Of Primary Site	66
White	Female	2004	Moderately differentiated; Grade II	IA	T1	N0	M0	Beam radiation	Yes	17	Dead	No Surgery Of Primary Site	83
White	Female	2004	Poorly differentiated; Grade III	IB	T2	N0	M0	Beam radiation	No/Unknown	41	Dead	No Surgery Of Primary Site	61
White	Female	2004	Poorly differentiated; Grade III	IA	T1	N0	M0	None/Unknown	No/Unknown	29	Dead	Lobectomy/Bilobectomy	67
White	Female	2004	Unknown	IA	T1	N0	M0	Beam radiation	Yes	131	Dead	No Surgery Of Primary Site	68
White	Male	2004	Poorly differentiated; Grade III	IA	T1	N0	M0	None/Unknown	No/Unknown	64	Dead	Lobectomy/Bilobectomy	71
White	Male	2004	Poorly differentiated; Grade III	IV	T1	N1	M1	None/Unknown	Yes	9	Dead	Lobectomy/Bilobectomy	57
White	Male	2004	Poorly differentiated; Grade III	IIIB	T4	N2	M0	None/Unknown	No/Unknown	5	Dead	No Surgery Of Primary Site	71
Other (American Indian/AK Native, Asian/Pacific Islander)	Female	2004	Moderately differentiated; Grade II	IB	T2	N0	M0	None/Unknown	No/Unknown	86	Dead	Lobectomy/Bilobectomy	48
White	Female	2004	Moderately differentiated; Grade II	IA	T1	N0	M0	None/Unknown	No/Unknown	141	Alive	Lobectomy/Bilobectomy	68
White	Female	2004	Unknown	IA	T1	N0	M0	Beam radiation	No/Unknown	11	Dead	No Surgery Of Primary Site	83
White	Male	2004	Poorly differentiated; Grade III	IV	T4	N2	M1	None/Unknown	Yes	35	Dead	No Surgery Of Primary Site	72
Other (American Indian/AK Native, Asian/Pacific Islander)	Female	2004	Poorly differentiated; Grade III	IIB	T2	N1	M0	None/Unknown	No/Unknown	17	Dead	No Surgery Of Primary Site	67
White	Male	2004	Poorly differentiated; Grade III	IA	T1	N0	M0	None/Unknown	No/Unknown	138	Alive	Lobectomy/Bilobectomy	60
Other (American Indian/AK Native, Asian/Pacific Islander)	Male	2004	Moderately differentiated; Grade II	IA	T1	N0	M0	None/Unknown	No/Unknown	41	Dead	Lobectomy/Bilobectomy	76
Other (American Indian/AK Native, Asian/Pacific Islander)	Male	2004	Poorly differentiated; Grade III	IIIB	T4	N0	M0	None/Unknown	No/Unknown	7	Dead	No Surgery Of Primary Site	85
White	Male	2004	Moderately differentiated; Grade II	IA	T1	N0	M0	None/Unknown	No/Unknown	138	Alive	Lobectomy/Bilobectomy	69
White	Male	2004	Unknown	IIIA	T1	N2	M0	None/Unknown	Yes	41	Dead	No Surgery Of Primary Site	76
White	Female	2004	Moderately differentiated; Grade II	IIIB	T4	N2	M0	Beam radiation	No/Unknown	20	Dead	No Surgery Of Primary Site	67
White	Male	2004	Poorly differentiated; Grade III	IV	T3	N2	M1	None/Unknown	Yes	3	Dead	No Surgery Of Primary Site	64
White	Female	2004	Unknown	IA	T1	N0	M0	Beam radiation	No/Unknown	34	Dead	No Surgery Of Primary Site	76
White	Female	2004	Unknown	IV	T4	N3	M1	None/Unknown	No/Unknown	10	Dead	No Surgery Of Primary Site	73
White	Male	2004	Poorly differentiated; Grade III	IIIA	T3	N1	M0	Beam radiation	Yes	132	Dead	Lobectomy/Bilobectomy	68
White	Female	2004	Moderately differentiated; Grade II	IIA	T1	N1	M0	None/Unknown	Yes	9	Dead	Lobectomy/Bilobectomy	77
White	Male	2004	Poorly differentiated; Grade III	IV	T4	N2	M1	None/Unknown	No/Unknown	3	Dead	No Surgery Of Primary Site	78
White	Female	2004	Poorly differentiated; Grade III	IA	T1	N0	M0	None/Unknown	No/Unknown	136	Alive	Lobectomy/Bilobectomy	78
White	Female	2004	Unknown	IA	T1	N0	M0	Beam radiation	No/Unknown	16	Dead	No Surgery Of Primary Site	72
White	Male	2004	Poorly differentiated; Grade III	IA	T1	N0	M0	None/Unknown	No/Unknown	125	Dead	Lobectomy/Bilobectomy	82
White	Male	2004	Poorly differentiated; Grade III	IV	T4	N2	M1	None/Unknown	Yes	26	Dead	No Surgery Of Primary Site	48
White	Male	2004	Unknown	IV	T2	N0	M1	Refused	No/Unknown	13	Dead	No Surgery Of Primary Site	84
White	Male	2004	Poorly differentiated; Grade III	IIIB	T4	N2	M0	Beam radiation	Yes	43	Dead	No Surgery Of Primary Site	64
White	Male	2004	Unknown	IV	T3	N3	M1	None/Unknown	No/Unknown	1	Dead	No Surgery Of Primary Site	73
White	Male	2004	Unknown	IA	T1	N0	M0	Beam radiation	No/Unknown	10	Dead	No Surgery Of Primary Site	73
White	Female	2004	Unknown	IIIB	T1	N3	M0	Beam radiation	Yes	8	Dead	No Surgery Of Primary Site	63
White	Female	2004	Moderately differentiated; Grade II	IA	T1	N0	M0	None/Unknown	No/Unknown	25	Dead	Lobectomy/Bilobectomy	70
White	Male	2004	Poorly differentiated; Grade III	IA	T1	N0	M0	None/Unknown	Yes	32	Dead	No Surgery Of Primary Site	69
White	Male	2004	Poorly differentiated; Grade III	IA	T1	N0	M0	None/Unknown	No/Unknown	10	Dead	No Surgery Of Primary Site	78
White	Female	2004	Unknown	IA	T1	N0	M0	None/Unknown	No/Unknown	1	Dead	No Surgery Of Primary Site	78
White	Female	2004	Moderately differentiated; Grade II	IIIA	T2	N2	M0	None/Unknown	No/Unknown	15	Dead	Lobectomy/Bilobectomy	71
White	Female	2004	Moderately differentiated; Grade II	IA	T1	N0	M0	None/Unknown	No/Unknown	78	Dead	Partial/Wedge/Segmental Resec., Lingulectomy, Partial Lobectomy, Sleeve Resec.	70
White	Female	2004	Poorly differentiated; Grade III	IV	T4	N2	M1	None/Unknown	No/Unknown	19	Dead	No Surgery Of Primary Site	70
White	Female	2004	Poorly differentiated; Grade III	IB	T2	N0	M0	None/Unknown	No/Unknown	20	Dead	Partial/Wedge/Segmental Resec., Lingulectomy, Partial Lobectomy, Sleeve Resec.	75
White	Female	2004	Unknown	IIIA	T1	N2	M0	Beam radiation	No/Unknown	36	Dead	No Surgery Of Primary Site	80
White	Male	2004	Moderately differentiated; Grade II	IIIA	T1	N2	M0	None/Unknown	No/Unknown	8	Dead	No Surgery Of Primary Site	80
White	Male	2004	Moderately differentiated; Grade II	IIIA	T2	N2	M0	Beam radiation	Yes	21	Dead	No Surgery Of Primary Site	61
White	Male	2004	Unknown	IV	T4	N2	M1	Beam radiation	Yes	6	Dead	No Surgery Of Primary Site	60
White	Male	2004	Moderately differentiated; Grade II	IIB	T2	N1	M0	Beam radiation	Yes	10	Dead	No Surgery Of Primary Site	74
White	Male	2004	Poorly differentiated; Grade III	IIA	T1	N1	M0	None/Unknown	Yes	94	Dead	Radical Pneumonectomy (Complete Pneumonectomy Plus Dissection Of Mediastinal LN)	59
White	Male	2004	Poorly differentiated; Grade III	IA	T1	N0	M0	None/Unknown	No/Unknown	28	Dead	Lobectomy/Bilobectomy	76
White	Male	2004	Moderately differentiated; Grade II	IIA	T1	N1	M0	None/Unknown	No/Unknown	143	Alive	Radical Pneumonectomy (Complete Pneumonectomy Plus Dissection Of Mediastinal LN)	61
White	Female	2004	Unknown	IA	T1	N0	M0	None/Unknown	No/Unknown	105	Dead	Lobectomy/Bilobectomy	60
White	Male	2004	Poorly differentiated; Grade III	IIB	T2	N1	M0	None/Unknown	No/Unknown	3	Dead	Complete/Total/Standard Pneumonectomy; Pneumonectomy, Nos	64
White	Female	2004	Moderately differentiated; Grade II	IA	T1	N0	M0	None/Unknown	No/Unknown	55	Dead	Lobectomy/Bilobectomy	72
White	Male	2004	Poorly differentiated; Grade III	IIIB	T4	N0	M0	None/Unknown	No/Unknown	71	Dead	Lobectomy/Bilobectomy	77
White	Male	2004	Moderately differentiated; Grade II	IA	T1	N0	M0	None/Unknown	No/Unknown	61	Dead	Lobectomy/Bilobectomy	77
White	Male	2004	Unknown	IIIB	T4	N0	M0	Beam radiation	Yes	38	Dead	Lobectomy/Bilobectomy	56
White	Female	2004	Unknown	IIA	T1	N1	M0	Beam radiation	Yes	21	Dead	No Surgery Of Primary Site	62
White	Male	2004	Unknown	IIIA	T1	N2	M0	Beam radiation	Yes	23	Dead	No Surgery Of Primary Site	70
White	Male	2004	Moderately differentiated; Grade II	IA	T1	N0	M0	None/Unknown	No/Unknown	3	Dead	Lobectomy/Bilobectomy	73
White	Male	2004	Poorly differentiated; Grade III	IV	T1	N3	M1	Beam radiation	No/Unknown	5	Dead	No Surgery Of Primary Site	81
White	Male	2004	Poorly differentiated; Grade III	IIIB	T4	N2	M0	None/Unknown	No/Unknown	2	Dead	No Surgery Of Primary Site	78
Black	Male	2004	Moderately differentiated; Grade II	IB	T2	N0	M0	Beam radiation	Yes	43	Dead	No Surgery Of Primary Site	80
Black	Male	2004	Unknown	IA	T1	N0	M0	None/Unknown	No/Unknown	20	Dead	No Surgery Of Primary Site	76
Black	Male	2004	Unknown	IV	T1	N3	M1	None/Unknown	Yes	3	Dead	No Surgery Of Primary Site	63
White	Female	2004	Moderately differentiated; Grade II	IA	T1	N0	M0	None/Unknown	No/Unknown	140	Alive	Lobectomy/Bilobectomy	61
Black	Male	2004	Unknown	IIB	T3	N0	M0	Beam radiation	Yes	142	Alive	Lobectomy/Bilobectomy	59
White	Female	2004	Unknown	IA	T1	N0	M0	None/Unknown	No/Unknown	25	Dead	Local Surgical Excision Or Destruction Of Lesion	63
White	Female	2004	Moderately differentiated; Grade II	IIIA	T3	N2	M0	Beam radiation	Yes	5	Dead	Complete/Total/Standard Pneumonectomy; Pneumonectomy, Nos	75
Black	Male	2004	Poorly differentiated; Grade III	IIIA	T2	N2	M0	None/Unknown	No/Unknown	2	Dead	Radical Pneumonectomy (Complete Pneumonectomy Plus Dissection Of Mediastinal LN)	67
White	Male	2004	Unknown	IIIB	T4	N2	M0	Beam radiation	Yes	6	Dead	No Surgery Of Primary Site	74
White	Female	2004	Moderately differentiated; Grade II	IA	T1	N0	M0	Beam radiation	No/Unknown	2	Dead	No Surgery Of Primary Site	66
White	Male	2004	Unknown	IIIB	T2	N3	M0	None/Unknown	No/Unknown	6	Dead	No Surgery Of Primary Site	84
White	Male	2004	Moderately differentiated; Grade II	IB	T2	N0	M0	None/Unknown	No/Unknown	Unknown	Dead	No Surgery Of Primary Site	90
Black	Female	2004	Unknown	IV	T1	N0	M1	None/Unknown	No/Unknown	9	Dead	No Surgery Of Primary Site	80
White	Male	2004	Poorly differentiated; Grade III	IA	T1	N0	M0	Beam radiation	No/Unknown	26	Dead	No Surgery Of Primary Site	84
White	Female	2004	Poorly differentiated; Grade III	IA	T1	N0	M0	Beam radiation	Yes	33	Dead	No Surgery Of Primary Site	66
White	Male	2004	Poorly differentiated; Grade III	IB	T2	N0	M0	None/Unknown	No/Unknown	46	Dead	Partial/Wedge/Segmental Resec., Lingulectomy, Partial Lobectomy, Sleeve Resec.	82
White	Male	2004	Poorly differentiated; Grade III	IA	T1	N0	M0	Beam radiation	No/Unknown	0	Dead	Partial/Wedge/Segmental Resec., Lingulectomy, Partial Lobectomy, Sleeve Resec.	90
Other (American Indian/AK Native, Asian/Pacific Islander)	Female	2004	Poorly differentiated; Grade III	IA	T1	N0	M0	None/Unknown	No/Unknown	141	Alive	Lobectomy/Bilobectomy	71
Black	Female	2004	Moderately differentiated; Grade II	IB	T2	N0	M0	Beam radiation	No/Unknown	41	Dead	Lobectomy/Bilobectomy	71
White	Female	2004	Moderately differentiated; Grade II	IIIB	T4	N0	M0	None/Unknown	No/Unknown	10	Dead	No Surgery Of Primary Site	88
White	Male	2004	Poorly differentiated; Grade III	IA	T1	N0	M0	None/Unknown	No/Unknown	32	Dead	Lobectomy/Bilobectomy	77
White	Female	2004	Poorly differentiated; Grade III	IB	T2	N0	M0	None/Unknown	No/Unknown	23	Dead	Lobectomy/Bilobectomy	74
White	Female	2004	Poorly differentiated; Grade III	IIIB	T4	N0	M0	None/Unknown	Yes	138	Alive	Partial/Wedge/Segmental Resec., Lingulectomy, Partial Lobectomy, Sleeve Resec.	68
White	Female	2004	Poorly differentiated; Grade III	IIIA	T1	N2	M0	None/Unknown	No/Unknown	8	Dead	No Surgery Of Primary Site	79
White	Male	2004	Poorly differentiated; Grade III	IB	T2	N0	M0	None/Unknown	No/Unknown	12	Dead	Lobectomy/Bilobectomy	66
White	Female	2004	Poorly differentiated; Grade III	IA	T1	N0	M0	None/Unknown	No/Unknown	27	Dead	No Surgery Of Primary Site	74
White	Female	2004	Poorly differentiated; Grade III	IIA	T1	N1	M0	None/Unknown	Yes	28	Dead	Lobectomy/Bilobectomy	63
Black	Female	2004	Moderately differentiated; Grade II	IV	T4	N2	M1	None/Unknown	Yes	21	Dead	No Surgery Of Primary Site	62
White	Male	2004	Poorly differentiated; Grade III	IIIB	T4	N3	M0	None/Unknown	Yes	21	Dead	No Surgery Of Primary Site	41
White	Male	2004	Well differentiated; Grade I	IV	T4	N0	M1	None/Unknown	Yes	2	Dead	No Surgery Of Primary Site	81
White	Female	2004	Poorly differentiated; Grade III	IIIB	T2	N3	M0	Beam radiation	Yes	11	Dead	No Surgery Of Primary Site	77
White	Female	2004	Poorly differentiated; Grade III	IIIB	T4	N2	M0	None/Unknown	Yes	12	Dead	No Surgery Of Primary Site	60
White	Male	2004	Unknown	IIIA	T1	N2	M0	None/Unknown	No/Unknown	82	Dead	No Surgery Of Primary Site	78
White	Male	2004	Poorly differentiated; Grade III	IIIB	T4	N2	M0	None/Unknown	No/Unknown	51	Dead	No Surgery Of Primary Site	57
White	Male	2004	Poorly differentiated; Grade III	IIIA	T1	N2	M0	None/Unknown	No/Unknown	9	Dead	Lobectomy/Bilobectomy	79
White	Female	2004	Unknown	IA	T1	N0	M0	Beam radiation	Yes	12	Dead	No Surgery Of Primary Site	66
White	Female	2004	Poorly differentiated; Grade III	IIA	T1	N1	M0	Refused	Yes	62	Dead	Lobectomy/Bilobectomy	54
Black	Female	2004	Unknown	IIA	T1	N1	M0	Beam radiation	No/Unknown	28	Dead	No Surgery Of Primary Site	87
White	Female	2004	Moderately differentiated; Grade II	IA	T1	N0	M0	None/Unknown	No/Unknown	23	Dead	Partial/Wedge/Segmental Resec., Lingulectomy, Partial Lobectomy, Sleeve Resec.	86
White	Female	2004	Moderately differentiated; Grade II	IA	T1	N0	M0	None/Unknown	No/Unknown	25	Dead	Partial/Wedge/Segmental Resec., Lingulectomy, Partial Lobectomy, Sleeve Resec.	72
White	Female	2004	Poorly differentiated; Grade III	IIIB	T4	N0	M0	None/Unknown	No/Unknown	62	Dead	Lobectomy/Bilobectomy	68
White	Male	2004	Moderately differentiated; Grade II	IIB	T3	N0	M0	Beam radiation	No/Unknown	5	Dead	Lobectomy/Bilobectomy	53
White	Female	2004	Unknown	IV	T3	N2	M1	None/Unknown	Yes	8	Dead	No Surgery Of Primary Site	70
White	Female	2004	Poorly differentiated; Grade III	IIIB	T4	N2	M0	None/Unknown	No/Unknown	1	Dead	No Surgery Of Primary Site	78
White	Male	2004	Poorly differentiated; Grade III	IIIA	T1	N2	M0	Beam radiation	No/Unknown	10	Dead	No Surgery Of Primary Site	87
White	Female	2004	Poorly differentiated; Grade III	IA	T1	N0	M0	None/Unknown	Yes	132	Dead	Lobectomy/Bilobectomy	66
White	Male	2004	Poorly differentiated; Grade III	IA	T1	N0	M0	Beam radiation	Yes	6	Dead	No Surgery Of Primary Site	87
Black	Female	2004	Moderately differentiated; Grade II	IIIB	T4	N2	M0	Beam radiation	Yes	2	Dead	No Surgery Of Primary Site	70
White	Male	2004	Poorly differentiated; Grade III	IV	T1	N2	M1	Beam radiation	No/Unknown	12	Dead	No Surgery Of Primary Site	82
White	Male	2004	Moderately differentiated; Grade II	IB	T2	N0	M0	None/Unknown	No/Unknown	63	Dead	Lobectomy/Bilobectomy	66
White	Male	2004	Unknown	IB	T2	N0	M0	None/Unknown	No/Unknown	13	Dead	No Surgery Of Primary Site	76
White	Male	2004	Unknown	IIIA	T2	N2	M0	Beam radiation	Yes	31	Dead	No Surgery Of Primary Site	68
White	Male	2004	Moderately differentiated; Grade II	IIIA	T1	N2	M0	Beam radiation	No/Unknown	35	Dead	No Surgery Of Primary Site	65
White	Female	2004	Unknown	IIIB	T4	N0	M0	Beam radiation	Yes	34	Dead	No Surgery Of Primary Site	57
White	Male	2004	Poorly differentiated; Grade III	IV	T4	N3	M1	Beam radiation	No/Unknown	0	Dead	No Surgery Of Primary Site	69
Black	Male	2004	Poorly differentiated; Grade III	IIIA	T3	N2	M0	Beam radiation	No/Unknown	9	Dead	No Surgery Of Primary Site	68
White	Female	2004	Poorly differentiated; Grade III	IV	T3	N2	M1	Beam radiation	Yes	6	Dead	No Surgery Of Primary Site	76
White	Male	2004	Unknown	IV	T4	N0	M1	Beam radiation	No/Unknown	4	Dead	No Surgery Of Primary Site	70
White	Male	2004	Unknown	IV	T4	N2	M1	None/Unknown	Yes	3	Dead	No Surgery Of Primary Site	51
White	Male	2004	Poorly differentiated; Grade III	IIIB	T4	N2	M0	None/Unknown	Yes	2	Dead	No Surgery Of Primary Site	77
White	Female	2004	Moderately differentiated; Grade II	IIIA	T3	N2	M0	Beam radiation	No/Unknown	0	Dead	No Surgery Of Primary Site	84
White	Female	2004	Unknown	IV	T1	N3	M1	Beam radiation	No/Unknown	3	Dead	No Surgery Of Primary Site	58
White	Male	2004	Moderately differentiated; Grade II	IA	T1	N0	M0	None/Unknown	No/Unknown	1	Dead	Lobectomy/Bilobectomy	81
White	Female	2004	Poorly differentiated; Grade III	IIIB	T4	N2	M0	None/Unknown	No/Unknown	9	Dead	No Surgery Of Primary Site	73
White	Male	2004	Poorly differentiated; Grade III	IV	T4	N2	M1	None/Unknown	Yes	11	Dead	No Surgery Of Primary Site	49
White	Female	2004	Moderately differentiated; Grade II	IB	T2	N0	M0	Beam radiation	No/Unknown	46	Dead	Lobectomy/Bilobectomy	74
White	Male	2004	Moderately differentiated; Grade II	IIIB	T4	N0	M0	Beam radiation	Yes	17	Dead	No Surgery Of Primary Site	76
White	Male	2004	Moderately differentiated; Grade II	IV	T4	N2	M1	None/Unknown	Yes	14	Dead	No Surgery Of Primary Site	66
White	Female	2004	Unknown	IIIB	T4	N3	M0	Beam radiation	Yes	23	Dead	No Surgery Of Primary Site	41
White	Female	2004	Poorly differentiated; Grade III	IIIA	T2	N2	M0	None/Unknown	Yes	45	Dead	Radical Pneumonectomy (Complete Pneumonectomy Plus Dissection Of Mediastinal LN)	62
White	Male	2004	Poorly differentiated; Grade III	IB	T2	N0	M0	None/Unknown	No/Unknown	6	Dead	No Surgery Of Primary Site	74
White	Male	2004	Moderately differentiated; Grade II	IIB	T2	N1	M0	None/Unknown	No/Unknown	135	Alive	Lobectomy/Bilobectomy	69
White	Female	2004	Poorly differentiated; Grade III	IV	T2	N3	M1	None/Unknown	Yes	16	Dead	No Surgery Of Primary Site	76
White	Male	2004	Unknown	IIIB	T4	N0	M0	Beam radiation	Yes	8	Dead	No Surgery Of Primary Site	66
White	Male	2004	Moderately differentiated; Grade II	IV	T4	N2	M1	Beam radiation	No/Unknown	2	Dead	Partial/Wedge/Segmental Resec., Lingulectomy, Partial Lobectomy, Sleeve Resec.	73
White	Male	2004	Poorly differentiated; Grade III	IA	T1	N0	M0	None/Unknown	No/Unknown	136	Alive	Lobectomy/Bilobectomy	67
White	Male	2004	Moderately differentiated; Grade II	IB	T2	N0	M0	None/Unknown	No/Unknown	71	Dead	Lobectomy/Bilobectomy	80
White	Male	2004	Moderately differentiated; Grade II	IIIA	T3	N1	M0	Beam radiation	Yes	17	Dead	No Surgery Of Primary Site	76
White	Female	2004	Poorly differentiated; Grade III	IB	T2	N0	M0	None/Unknown	No/Unknown	129	Alive	Lobectomy/Bilobectomy	65
White	Female	2004	Moderately differentiated; Grade II	IV	T4	N0	M1	None/Unknown	No/Unknown	21	Dead	No Surgery Of Primary Site	77
White	Female	2004	Moderately differentiated; Grade II	IIB	T2	N1	M0	Refused	No/Unknown	19	Dead	No Surgery Of Primary Site	75
White	Female	2004	Moderately differentiated; Grade II	IA	T1	N0	M0	None/Unknown	No/Unknown	98	Dead	Lobectomy/Bilobectomy	60
Black	Female	2004	Unknown	IIIB	T3	N3	M0	Beam radiation	No/Unknown	61	Dead	No Surgery Of Primary Site	61
White	Male	2004	Moderately differentiated; Grade II	IA	T1	N0	M0	None/Unknown	No/Unknown	16	Dead	Lobectomy/Bilobectomy	57
White	Female	2004	Moderately differentiated; Grade II	IA	T1	N0	M0	None/Unknown	No/Unknown	71	Dead	Lobectomy/Bilobectomy	70
Black	Male	2004	Moderately differentiated; Grade II	IIIA	T1	N2	M0	Beam radiation	No/Unknown	18	Dead	No Surgery Of Primary Site	81
White	Female	2004	Unknown	IV	T4	N0	M1	None/Unknown	Yes	7	Dead	No Surgery Of Primary Site	69
Other (American Indian/AK Native, Asian/Pacific Islander)	Male	2004	Unknown	IIIB	T4	N3	M0	Beam radiation	Yes	16	Dead	No Surgery Of Primary Site	59
White	Female	2004	Poorly differentiated; Grade III	IV	T1	N0	M1	Beam radiation	Yes	20	Dead	No Surgery Of Primary Site	75
White	Male	2004	Poorly differentiated; Grade III	IIIB	T4	N2	M0	None/Unknown	Yes	9	Dead	No Surgery Of Primary Site	70
White	Male	2004	Moderately differentiated; Grade II	IV	T2	N0	M1	Beam radiation	Yes	125	Dead	Complete/Total/Standard Pneumonectomy; Pneumonectomy, Nos	65
White	Male	2004	Unknown	IA	T1	N0	M0	None/Unknown	Yes	10	Dead	No Surgery Of Primary Site	65
White	Female	2004	Moderately differentiated; Grade II	IB	T2	N0	M0	None/Unknown	No/Unknown	11	Dead	Partial/Wedge/Segmental Resec., Lingulectomy, Partial Lobectomy, Sleeve Resec.	73
Black	Male	2004	Unknown	IIIB	T4	N0	M0	Refused	Yes	12	Dead	No Surgery Of Primary Site	73
White	Female	2004	Moderately differentiated; Grade II	IIIB	T4	N0	M0	None/Unknown	No/Unknown	134	Alive	Lobectomy/Bilobectomy	54
White	Female	2004	Moderately differentiated; Grade II	IA	T1	N0	M0	None/Unknown	No/Unknown	49	Dead	Lobectomy/Bilobectomy	77
White	Female	2004	Unknown	IV	T2	N0	M1	Beam radiation	Yes	2	Dead	No Surgery Of Primary Site	75
White	Female	2004	Moderately differentiated; Grade II	IA	T1	N0	M0	Beam radiation	Yes	135	Dead	No Surgery Of Primary Site	67
White	Male	2004	Poorly differentiated; Grade III	IA	T1	N0	M0	None/Unknown	No/Unknown	69	Dead	Lobectomy/Bilobectomy	72
White	Male	2004	Moderately differentiated; Grade II	IV	T2	N1	M1	Beam radiation	Yes	10	Dead	No Surgery Of Primary Site	67
White	Male	2004	Poorly differentiated; Grade III	IA	T1	N0	M0	Beam radiation	No/Unknown	43	Dead	No Surgery Of Primary Site	70
White	Female	2004	Moderately differentiated; Grade II	IB	T2	N0	M0	None/Unknown	No/Unknown	122	Alive	Lobectomy/Bilobectomy	82
White	Male	2004	Unknown	IV	T1	N3	M1	None/Unknown	Yes	2	Dead	No Surgery Of Primary Site	79
White	Male	2004	Poorly differentiated; Grade III	IIB	T2	N1	M0	None/Unknown	No/Unknown	23	Dead	Lobectomy/Bilobectomy	65
White	Male	2004	Poorly differentiated; Grade III	IIIB	T2	N3	M0	Beam radiation	No/Unknown	10	Dead	No Surgery Of Primary Site	64
White	Female	2004	Moderately differentiated; Grade II	IIIA	T1	N2	M0	Beam radiation	No/Unknown	15	Dead	No Surgery Of Primary Site	81
Other (American Indian/AK Native, Asian/Pacific Islander)	Female	2004	Unknown	IV	T1	N2	M1	None/Unknown	Yes	106	Dead	No Surgery Of Primary Site	58
White	Female	2004	Poorly differentiated; Grade III	IIA	T1	N1	M0	None/Unknown	No/Unknown	10	Dead	Lobectomy/Bilobectomy	74
White	Male	2004	Moderately differentiated; Grade II	IB	T2	N0	M0	None/Unknown	No/Unknown	1	Dead	Lobectomy/Bilobectomy	72
White	Male	2004	Poorly differentiated; Grade III	IIA	T1	N1	M0	None/Unknown	No/Unknown	7	Dead	Lobectomy/Bilobectomy	61
White	Male	2004	Moderately differentiated; Grade II	IV	T4	N0	M1	Beam radiation	No/Unknown	5	Dead	No Surgery Of Primary Site	77
White	Male	2004	Moderately differentiated; Grade II	IA	T1	N0	M0	None/Unknown	No/Unknown	18	Dead	Partial/Wedge/Segmental Resec., Lingulectomy, Partial Lobectomy, Sleeve Resec.	69
White	Male	2004	Moderately differentiated; Grade II	IA	T1	N0	M0	None/Unknown	No/Unknown	17	Dead	Lobectomy/Bilobectomy	71
White	Male	2004	Well differentiated; Grade I	IA	T1	N0	M0	None/Unknown	No/Unknown	2	Dead	No Surgery Of Primary Site	60
White	Male	2004	Poorly differentiated; Grade III	IV	T2	N0	M1	None/Unknown	Yes	10	Dead	Lobectomy/Bilobectomy	69
White	Male	2004	Well differentiated; Grade I	IA	T1	N0	M0	None/Unknown	No/Unknown	41	Dead	Lobectomy/Bilobectomy	55
White	Male	2004	Moderately differentiated; Grade II	IA	T1	N0	M0	None/Unknown	No/Unknown	104	Dead	Lobectomy/Bilobectomy	72
White	Male	2004	Moderately differentiated; Grade II	IB	T2	N0	M0	None/Unknown	No/Unknown	18	Dead	Radical Pneumonectomy (Complete Pneumonectomy Plus Dissection Of Mediastinal LN)	56
White	Male	2004	Poorly differentiated; Grade III	IV	T4	N2	M1	Beam radiation	Yes	5	Dead	No Surgery Of Primary Site	81
Black	Female	2004	Unknown	IIIB	T4	N3	M0	None/Unknown	No/Unknown	5	Dead	No Surgery Of Primary Site	79
White	Male	2004	Poorly differentiated; Grade III	IA	T1	N0	M0	None/Unknown	No/Unknown	5	Dead	Lobectomy/Bilobectomy	63
White	Male	2004	Poorly differentiated; Grade III	IIIA	T2	N2	M0	None/Unknown	No/Unknown	13	Dead	Partial/Wedge/Segmental Resec., Lingulectomy, Partial Lobectomy, Sleeve Resec.	72
White	Female	2004	Unknown	IIIA	T2	N2	M0	None/Unknown	No/Unknown	109	Dead	Lobectomy/Bilobectomy	73
White	Male	2004	Poorly differentiated; Grade III	IV	T4	N2	M1	None/Unknown	Yes	0	Dead	No Surgery Of Primary Site	64
White	Male	2004	Well differentiated; Grade I	IIIA	T2	N2	M0	None/Unknown	Yes	3	Dead	No Surgery Of Primary Site	53
White	Male	2004	Moderately differentiated; Grade II	IA	T1	N0	M0	None/Unknown	No/Unknown	28	Dead	Lobectomy/Bilobectomy	71
White	Male	2004	Unknown	IV	T4	N2	M1	None/Unknown	No/Unknown	1	Dead	No Surgery Of Primary Site	75
White	Female	2004	Moderately differentiated; Grade II	IA	T1	N0	M0	None/Unknown	No/Unknown	1	Dead	No Surgery Of Primary Site	76
White	Female	2004	Poorly differentiated; Grade III	IIIA	T1	N2	M0	Beam radiation	No/Unknown	15	Dead	No Surgery Of Primary Site	74
White	Male	2004	Poorly differentiated; Grade III	IA	T1	N0	M0	None/Unknown	No/Unknown	19	Dead	Partial/Wedge/Segmental Resec., Lingulectomy, Partial Lobectomy, Sleeve Resec.	82
White	Male	2004	Poorly differentiated; Grade III	IIIB	T4	N1	M0	None/Unknown	Yes	20	Dead	Lobectomy/Bilobectomy	55
White	Female	2004	Poorly differentiated; Grade III	IIIB	T4	N3	M0	None/Unknown	No/Unknown	135	Alive	No Surgery Of Primary Site	75
White	Male	2004	Undifferentiated; anaplastic; Grade IV	IA	T1	N0	M0	None/Unknown	No/Unknown	116	Dead	Lobectomy/Bilobectomy	73
White	Female	2004	Poorly differentiated; Grade III	IV	T4	N2	M1	Beam radiation	Yes	17	Dead	No Surgery Of Primary Site	66
White	Male	2004	Unknown	IV	T4	N2	M1	None/Unknown	Yes	1	Dead	No Surgery Of Primary Site	67
White	Female	2004	Unknown	IV	T4	N3	M1	Beam radiation	No/Unknown	7	Dead	No Surgery Of Primary Site	63
White	Male	2004	Unknown	IIIB	T4	N2	M0	None/Unknown	No/Unknown	2	Dead	No Surgery Of Primary Site	84
White	Female	2004	Unknown	IA	T1	N0	M0	Beam radiation	No/Unknown	13	Dead	No Surgery Of Primary Site	73
Other (American Indian/AK Native, Asian/Pacific Islander)	Male	2004	Moderately differentiated; Grade II	IV	T1	N2	M1	None/Unknown	No/Unknown	17	Dead	No Surgery Of Primary Site	61
Black	Female	2004	Poorly differentiated; Grade III	IV	T1	N0	M1	Beam radiation	No/Unknown	12	Dead	No Surgery Of Primary Site	49
White	Male	2004	Poorly differentiated; Grade III	IV	T4	N2	M1	Beam radiation	Yes	8	Dead	No Surgery Of Primary Site	49
White	Male	2004	Poorly differentiated; Grade III	IB	T2	N0	M0	None/Unknown	No/Unknown	13	Dead	Lobectomy/Bilobectomy	76
Black	Male	2004	Poorly differentiated; Grade III	IIIA	T1	N2	M0	Beam radiation	Yes	17	Dead	No Surgery Of Primary Site	70
White	Female	2004	Unknown	IIIB	T4	N3	M0	Beam radiation	Yes	1	Dead	No Surgery Of Primary Site	57
White	Male	2004	Poorly differentiated; Grade III	IIB	T3	N0	M0	None/Unknown	Yes	18	Dead	No Surgery Of Primary Site	57
White	Female	2004	Poorly differentiated; Grade III	IA	T1	N0	M0	None/Unknown	No/Unknown	12	Dead	Lobectomy/Bilobectomy	75
White	Male	2004	Poorly differentiated; Grade III	IA	T1	N0	M0	Beam radiation	No/Unknown	14	Dead	No Surgery Of Primary Site	70
Black	Male	2004	Poorly differentiated; Grade III	IA	T1	N0	M0	Beam radiation	No/Unknown	10	Dead	No Surgery Of Primary Site	67
White	Male	2004	Unknown	IA	T1	N0	M0	Beam radiation	No/Unknown	21	Dead	No Surgery Of Primary Site	84
Black	Female	2004	Poorly differentiated; Grade III	IA	T1	N0	M0	None/Unknown	No/Unknown	141	Alive	Lobectomy/Bilobectomy	63
Black	Male	2004	Unknown	IIIB	T4	N2	M0	Beam radiation	Yes	24	Dead	No Surgery Of Primary Site	53
Black	Female	2004	Unknown	IB	T2	N0	M0	Beam radiation	No/Unknown	143	Alive	No Surgery Of Primary Site	63
White	Male	2004	Unknown	IV	T1	N3	M1	None/Unknown	Yes	17	Dead	No Surgery Of Primary Site	67
Black	Male	2004	Undifferentiated; anaplastic; Grade IV	IV	T2	N2	M1	None/Unknown	No/Unknown	0	Dead	No Surgery Of Primary Site	62
White	Male	2004	Unknown	IB	T2	N0	M0	Beam radiation	Yes	23	Dead	No Surgery Of Primary Site	78
White	Female	2004	Moderately differentiated; Grade II	IIIB	T4	N0	M0	None/Unknown	Yes	85	Dead	Lobectomy/Bilobectomy	74
White	Male	2004	Moderately differentiated; Grade II	IA	T1	N0	M0	None/Unknown	No/Unknown	52	Dead	Lobectomy/Bilobectomy	77
White	Male	2004	Unknown	IV	T4	N0	M1	Beam radiation	No/Unknown	0	Dead	No Surgery Of Primary Site	64
Black	Male	2004	Unknown	IIIA	T2	N2	M0	Beam radiation	Yes	58	Dead	No Surgery Of Primary Site	71
White	Female	2004	Poorly differentiated; Grade III	IA	T1	N0	M0	None/Unknown	No/Unknown	134	Alive	Lobectomy/Bilobectomy	76
White	Female	2004	Poorly differentiated; Grade III	IIA	T1	N1	M0	Beam radiation	No/Unknown	19	Dead	No Surgery Of Primary Site	80
White	Male	2004	Poorly differentiated; Grade III	IA	T1	N0	M0	Beam radiation	No/Unknown	7	Dead	No Surgery Of Primary Site	80
White	Male	2004	Unknown	IV	T4	N3	M1	None/Unknown	No/Unknown	6	Dead	No Surgery Of Primary Site	88
White	Male	2004	Moderately differentiated; Grade II	IB	T2	N0	M0	None/Unknown	No/Unknown	1	Dead	Partial/Wedge/Segmental Resec., Lingulectomy, Partial Lobectomy, Sleeve Resec.	83
White	Male	2004	Moderately differentiated; Grade II	IA	T1	N0	M0	None/Unknown	No/Unknown	59	Dead	Lobectomy/Bilobectomy	82
White	Male	2004	Poorly differentiated; Grade III	IV	T3	N0	M1	Beam radiation	No/Unknown	2	Dead	No Surgery Of Primary Site	86
White	Female	2004	Unknown	IA	T1	N0	M0	Beam radiation	No/Unknown	27	Dead	No Surgery Of Primary Site	65
White	Male	2004	Moderately differentiated; Grade II	IB	T2	N0	M0	None/Unknown	No/Unknown	105	Dead	Lobectomy/Bilobectomy	78
White	Male	2004	Poorly differentiated; Grade III	IIIB	T4	N0	M0	None/Unknown	No/Unknown	0	Dead	No Surgery Of Primary Site	72
White	Male	2004	Moderately differentiated; Grade II	IA	T1	N0	M0	None/Unknown	No/Unknown	142	Alive	Lobectomy/Bilobectomy	68
Black	Female	2004	Poorly differentiated; Grade III	IV	T4	N0	M1	None/Unknown	Yes	13	Dead	No Surgery Of Primary Site	47
White	Female	2004	Moderately differentiated; Grade II	IA	T1	N0	M0	None/Unknown	No/Unknown	65	Dead	Lobectomy/Bilobectomy	77
White	Female	2004	Unknown	IIIA	T2	N2	M0	Beam radiation	No/Unknown	2	Dead	No Surgery Of Primary Site	71
White	Male	2004	Unknown	IV	T3	N2	M1	Beam radiation	Yes	9	Dead	No Surgery Of Primary Site	52
White	Female	2004	Poorly differentiated; Grade III	IA	T1	N0	M0	None/Unknown	No/Unknown	123	Dead	Lobectomy/Bilobectomy	61
White	Male	2004	Poorly differentiated; Grade III	IV	T4	N2	M1	None/Unknown	No/Unknown	1	Dead	No Surgery Of Primary Site	71
White	Male	2004	Moderately differentiated; Grade II	IIIB	T2	N3	M0	Beam radiation	Yes	40	Dead	No Surgery Of Primary Site	79
Black	Male	2004	Unknown	IIIB	T4	N0	M0	Beam radiation	Yes	5	Dead	No Surgery Of Primary Site	48
White	Male	2004	Moderately differentiated; Grade II	IB	T2	N0	M0	None/Unknown	No/Unknown	0	Dead	Lobectomy/Bilobectomy	77
White	Female	2004	Moderately differentiated; Grade II	IV	T4	N0	M1	None/Unknown	Yes	2	Dead	No Surgery Of Primary Site	76
White	Female	2004	Moderately differentiated; Grade II	IIIB	T4	N2	M0	None/Unknown	No/Unknown	1	Dead	No Surgery Of Primary Site	62
White	Male	2004	Unknown	IIIB	T4	N2	M0	Beam radiation	Yes	21	Dead	No Surgery Of Primary Site	74
White	Male	2004	Unknown	IB	T2	N0	M0	Beam radiation	No/Unknown	1	Dead	No Surgery Of Primary Site	88
Black	Female	2004	Poorly differentiated; Grade III	IIIA	T2	N2	M0	None/Unknown	No/Unknown	3	Dead	No Surgery Of Primary Site	84
White	Female	2004	Poorly differentiated; Grade III	IA	T1	N0	M0	None/Unknown	No/Unknown	11	Dead	Lobectomy/Bilobectomy	86
Other (American Indian/AK Native, Asian/Pacific Islander)	Male	2004	Poorly differentiated; Grade III	IIIA	T3	N2	M0	Beam radiation	Yes	25	Dead	No Surgery Of Primary Site	60
White	Male	2004	Moderately differentiated; Grade II	IV	T2	N3	M1	None/Unknown	Yes	7	Dead	No Surgery Of Primary Site	46
White	Male	2004	Unknown	IIIB	T3	N3	M0	Beam radiation	Yes	25	Dead	No Surgery Of Primary Site	67
White	Female	2004	Unknown	IV	T1	N2	M1	None/Unknown	No/Unknown	11	Dead	No Surgery Of Primary Site	55
White	Male	2004	Unknown	IIIA	T2	N2	M0	Beam radiation	No/Unknown	34	Dead	No Surgery Of Primary Site	79
White	Female	2004	Unknown	IIIB	T4	N2	M0	None/Unknown	Yes	8	Dead	No Surgery Of Primary Site	81
White	Male	2004	Moderately differentiated; Grade II	IA	T1	N0	M0	None/Unknown	Yes	51	Dead	Lobectomy/Bilobectomy	77
White	Male	2004	Poorly differentiated; Grade III	IB	T2	N0	M0	None/Unknown	No/Unknown	0	Dead	Lobectomy/Bilobectomy	48
White	Female	2004	Unknown	IIIB	T4	N0	M0	None/Unknown	No/Unknown	10	Dead	Partial/Wedge/Segmental Resec., Lingulectomy, Partial Lobectomy, Sleeve Resec.	80
White	Male	2004	Moderately differentiated; Grade II	IA	T1	N0	M0	None/Unknown	Yes	13	Dead	No Surgery Of Primary Site	79
White	Male	2004	Poorly differentiated; Grade III	IB	T2	N0	M0	None/Unknown	No/Unknown	2	Dead	Lobectomy/Bilobectomy	77
White	Male	2004	Moderately differentiated; Grade II	IV	T2	N0	M1	Beam radiation	Yes	6	Dead	No Surgery Of Primary Site	82
White	Male	2004	Moderately differentiated; Grade II	IA	T1	N0	M0	Beam radiation	Yes	33	Dead	No Surgery Of Primary Site	62
White	Female	2004	Unknown	IV	T2	N2	M1	Beam radiation	Yes	10	Dead	No Surgery Of Primary Site	57
White	Female	2004	Unknown	IV	T2	N0	M1	Beam radiation	Yes	9	Dead	No Surgery Of Primary Site	57
White	Male	2004	Poorly differentiated; Grade III	IIA	T1	N1	M0	None/Unknown	Yes	26	Dead	Radical Pneumonectomy (Complete Pneumonectomy Plus Dissection Of Mediastinal LN)	73
White	Male	2004	Unknown	IV	T4	N3	M1	Beam radiation	No/Unknown	3	Dead	No Surgery Of Primary Site	57
White	Female	2004	Unknown	IA	T1	N0	M0	None/Unknown	No/Unknown	20	Dead	No Surgery Of Primary Site	71
Black	Female	2004	Moderately differentiated; Grade II	IIA	T1	N1	M0	None/Unknown	No/Unknown	12	Dead	Partial/Wedge/Segmental Resec., Lingulectomy, Partial Lobectomy, Sleeve Resec.	76
White	Male	2004	Poorly differentiated; Grade III	IIIA	T2	N2	M0	Beam radiation	Yes	24	Dead	Lobectomy/Bilobectomy	48
White	Male	2004	Unknown	IV	T1	N2	M1	None/Unknown	Yes	11	Dead	No Surgery Of Primary Site	70
White	Male	2004	Unknown	IIIB	T4	N1	M0	None/Unknown	No/Unknown	43	Dead	No Surgery Of Primary Site	82
White	Female	2004	Poorly differentiated; Grade III	IIIA	T2	N2	M0	Beam radiation	Yes	21	Dead	Lobectomy/Bilobectomy	64
White	Male	2004	Unknown	IV	T1	N3	M1	Beam radiation	Yes	9	Dead	No Surgery Of Primary Site	50
White	Male	2004	Poorly differentiated; Grade III	IIIB	T4	N2	M0	Beam radiation	Yes	4	Dead	No Surgery Of Primary Site	78
White	Female	2004	Moderately differentiated; Grade II	IIA	T1	N1	M0	Beam radiation	No/Unknown	48	Dead	Lobectomy/Bilobectomy	77
Black	Male	2004	Poorly differentiated; Grade III	IIIB	T4	N1	M0	Beam radiation	Yes	45	Dead	No Surgery Of Primary Site	57
White	Female	2004	Poorly differentiated; Grade III	IIIB	T4	N0	M0	None/Unknown	No/Unknown	83	Dead	Lobectomy/Bilobectomy	80
White	Female	2004	Moderately differentiated; Grade II	IV	T1	N2	M1	None/Unknown	Yes	30	Dead	No Surgery Of Primary Site	70
White	Female	2004	Poorly differentiated; Grade III	IA	T1	N0	M0	None/Unknown	Yes	137	Alive	Lobectomy/Bilobectomy	64
White	Female	2004	Poorly differentiated; Grade III	IIA	T1	N1	M0	None/Unknown	No/Unknown	13	Dead	No Surgery Of Primary Site	74
White	Male	2004	Moderately differentiated; Grade II	IIIA	T1	N2	M0	None/Unknown	Yes	6	Dead	No Surgery Of Primary Site	67
White	Male	2004	Unknown	IIA	T1	N1	M0	None/Unknown	No/Unknown	61	Dead	Lobectomy/Bilobectomy	79
White	Male	2004	Poorly differentiated; Grade III	IIIB	T4	N1	M0	None/Unknown	No/Unknown	0	Dead	No Surgery Of Primary Site	56
Black	Female	2004	Poorly differentiated; Grade III	IA	T1	N0	M0	None/Unknown	No/Unknown	110	Dead	Lobectomy/Bilobectomy	63
White	Male	2004	Moderately differentiated; Grade II	IIIB	T4	N0	M0	None/Unknown	No/Unknown	Unknown	Dead	No Surgery Of Primary Site	65
White	Male	2004	Unknown	IA	T1	N0	M0	None/Unknown	No/Unknown	2	Dead	No Surgery Of Primary Site	68
Black	Male	2004	Moderately differentiated; Grade II	IIIA	T3	N2	M0	Beam radiation	Yes	14	Dead	No Surgery Of Primary Site	63
White	Male	2004	Poorly differentiated; Grade III	IIB	T2	N1	M0	None/Unknown	Yes	67	Dead	Radical Pneumonectomy (Complete Pneumonectomy Plus Dissection Of Mediastinal LN)	63
White	Male	2004	Poorly differentiated; Grade III	IA	T1	N0	M0	None/Unknown	No/Unknown	135	Dead	Lobectomy/Bilobectomy	55
White	Female	2004	Unknown	IV	T3	N1	M1	Beam radiation	Yes	17	Dead	No Surgery Of Primary Site	71
White	Male	2004	Poorly differentiated; Grade III	IA	T1	N0	M0	None/Unknown	No/Unknown	2	Dead	Lobectomy/Bilobectomy	75
White	Male	2004	Moderately differentiated; Grade II	IB	T2	N0	M0	None/Unknown	No/Unknown	6	Dead	Lobectomy/Bilobectomy	71
White	Male	2004	Moderately differentiated; Grade II	IV	T2	N2	M1	None/Unknown	No/Unknown	0	Dead	No Surgery Of Primary Site	76
White	Male	2004	Unknown	IA	T1	N0	M0	None/Unknown	No/Unknown	0	Dead	No Surgery Of Primary Site	82
White	Male	2004	Poorly differentiated; Grade III	IV	T1	N0	M1	None/Unknown	No/Unknown	37	Dead	No Surgery Of Primary Site	69
Black	Female	2004	Poorly differentiated; Grade III	IIB	T2	N1	M0	None/Unknown	Yes	118	Alive	Lobectomy/Bilobectomy	59
White	Male	2004	Moderately differentiated; Grade II	IIIA	T3	N1	M0	Beam radiation	Yes	29	Dead	Complete/Total/Standard Pneumonectomy; Pneumonectomy, Nos	62
White	Male	2004	Poorly differentiated; Grade III	IV	T2	N2	M1	Beam radiation	Yes	5	Dead	No Surgery Of Primary Site	57
White	Female	2004	Well differentiated; Grade I	IB	T2	N0	M0	None/Unknown	No/Unknown	135	Alive	Lobectomy/Bilobectomy	52
White	Male	2004	Well differentiated; Grade I	IIB	T3	N0	M0	None/Unknown	No/Unknown	27	Dead	Partial/Wedge/Segmental Resec., Lingulectomy, Partial Lobectomy, Sleeve Resec.	85
White	Female	2004	Poorly differentiated; Grade III	IB	T2	N0	M0	None/Unknown	No/Unknown	8	Dead	Lobectomy/Bilobectomy	87
White	Male	2004	Poorly differentiated; Grade III	IIIA	T2	N2	M0	None/Unknown	Yes	23	Dead	No Surgery Of Primary Site	59
White	Female	2004	Unknown	IIIB	T4	N1	M0	Beam radiation	No/Unknown	3	Dead	No Surgery Of Primary Site	79
White	Male	2004	Moderately differentiated; Grade II	IB	T2	N0	M0	None/Unknown	No/Unknown	58	Dead	Lobectomy/Bilobectomy	74
White	Male	2004	Unknown	IB	T2	N0	M0	None/Unknown	No/Unknown	1	Dead	No Surgery Of Primary Site	79
White	Male	2004	Unknown	IV	T2	N0	M1	Beam radiation	No/Unknown	1	Dead	No Surgery Of Primary Site	72
White	Male	2004	Poorly differentiated; Grade III	IB	T2	N0	M0	None/Unknown	Yes	134	Dead	Partial/Wedge/Segmental Resec., Lingulectomy, Partial Lobectomy, Sleeve Resec.	61
White	Male	2004	Poorly differentiated; Grade III	IV	T4	N1	M1	None/Unknown	No/Unknown	0	Dead	No Surgery Of Primary Site	64
White	Female	2004	Moderately differentiated; Grade II	IB	T2	N0	M0	None/Unknown	No/Unknown	49	Dead	Lobectomy/Bilobectomy	78
White	Male	2004	Poorly differentiated; Grade III	IIIB	T4	N0	M0	Beam radiation	Yes	13	Dead	No Surgery Of Primary Site	65
White	Female	2004	Moderately differentiated; Grade II	IB	T2	N0	M0	None/Unknown	No/Unknown	58	Dead	Lobectomy/Bilobectomy	57
White	Male	2004	Unknown	IIIA	T2	N2	M0	Beam radiation	Yes	11	Dead	No Surgery Of Primary Site	60
Black	Male	2004	Poorly differentiated; Grade III	IB	T2	N0	M0	None/Unknown	No/Unknown	55	Dead	Lobectomy/Bilobectomy	73
White	Female	2004	Poorly differentiated; Grade III	IB	T2	N0	M0	None/Unknown	No/Unknown	135	Alive	Lobectomy/Bilobectomy	75
White	Male	2004	Poorly differentiated; Grade III	IB	T2	N0	M0	None/Unknown	No/Unknown	50	Dead	Partial/Wedge/Segmental Resec., Lingulectomy, Partial Lobectomy, Sleeve Resec.	85
White	Male	2004	Poorly differentiated; Grade III	IB	T2	N0	M0	None/Unknown	No/Unknown	129	Alive	Lobectomy/Bilobectomy	76
White	Female	2004	Poorly differentiated; Grade III	IIIB	T4	N2	M0	Beam radiation	Yes	30	Dead	No Surgery Of Primary Site	64
White	Male	2004	Poorly differentiated; Grade III	IB	T2	N0	M0	Beam radiation	Yes	32	Dead	No Surgery Of Primary Site	69
White	Male	2004	Poorly differentiated; Grade III	IB	T2	N0	M0	None/Unknown	No/Unknown	76	Dead	Lobectomy/Bilobectomy	77
White	Male	2004	Poorly differentiated; Grade III	IB	T2	N0	M0	None/Unknown	No/Unknown	2	Dead	Lobectomy/Bilobectomy	73
White	Male	2004	Well differentiated; Grade I	IB	T2	N0	M0	Beam radiation	No/Unknown	10	Dead	No Surgery Of Primary Site	69
White	Male	2004	Unknown	IB	T2	N0	M0	Beam radiation	No/Unknown	52	Dead	No Surgery Of Primary Site	75
White	Male	2004	Poorly differentiated; Grade III	IIIA	T3	N1	M0	None/Unknown	No/Unknown	0	Dead	Complete/Total/Standard Pneumonectomy; Pneumonectomy, Nos	65
White	Male	2004	Poorly differentiated; Grade III	IV	T2	N3	M1	None/Unknown	No/Unknown	0	Dead	No Surgery Of Primary Site	75
White	Female	2004	Moderately differentiated; Grade II	IB	T2	N0	M0	None/Unknown	Yes	14	Dead	Partial/Wedge/Segmental Resec., Lingulectomy, Partial Lobectomy, Sleeve Resec.	76
White	Male	2004	Moderately differentiated; Grade II	IIB	T2	N1	M0	None/Unknown	No/Unknown	120	Dead	Lobectomy/Bilobectomy	79
White	Male	2004	Poorly differentiated; Grade III	IB	T2	N0	M0	None/Unknown	No/Unknown	112	Dead	Lobectomy/Bilobectomy	68
White	Female	2004	Poorly differentiated; Grade III	IV	T2	N3	M1	None/Unknown	Yes	4	Dead	No Surgery Of Primary Site	69
White	Male	2004	Moderately differentiated; Grade II	IV	T2	N2	M1	None/Unknown	Yes	36	Dead	No Surgery Of Primary Site	66
White	Male	2004	Poorly differentiated; Grade III	IV	T4	N2	M1	None/Unknown	No/Unknown	0	Dead	No Surgery Of Primary Site	74
White	Male	2004	Poorly differentiated; Grade III	IV	T4	N1	M1	None/Unknown	Yes	7	Dead	No Surgery Of Primary Site	78
White	Male	2004	Poorly differentiated; Grade III	IIIA	T3	N2	M0	Beam radiation	Yes	9	Dead	Partial/Wedge/Segmental Resec., Lingulectomy, Partial Lobectomy, Sleeve Resec.	54
White	Male	2004	Poorly differentiated; Grade III	IB	T2	N0	M0	None/Unknown	No/Unknown	5	Dead	Lobectomy/Bilobectomy	73
White	Female	2004	Poorly differentiated; Grade III	IB	T2	N0	M0	None/Unknown	No/Unknown	101	Dead	Lobectomy/Bilobectomy	77
White	Female	2004	Poorly differentiated; Grade III	IB	T2	N0	M0	None/Unknown	No/Unknown	122	Dead	Lobectomy/Bilobectomy	55
Black	Female	2004	Unknown	IIIB	T4	N0	M0	Beam radiation	No/Unknown	42	Dead	No Surgery Of Primary Site	71
White	Male	2004	Moderately differentiated; Grade II	IIIA	T2	N2	M0	None/Unknown	No/Unknown	34	Dead	Radical Pneumonectomy (Complete Pneumonectomy Plus Dissection Of Mediastinal LN)	76
White	Female	2004	Poorly differentiated; Grade III	IB	T2	N0	M0	None/Unknown	No/Unknown	63	Dead	Lobectomy/Bilobectomy	65
Black	Female	2004	Poorly differentiated; Grade III	IIIA	T2	N2	M0	Beam radiation	Yes	10	Dead	Lobectomy/Bilobectomy	51
White	Male	2004	Unknown	IIIB	T2	N3	M0	None/Unknown	No/Unknown	1	Dead	No Surgery Of Primary Site	83
White	Male	2004	Unknown	IV	T4	N3	M1	None/Unknown	No/Unknown	0	Dead	No Surgery Of Primary Site	61
White	Female	2004	Poorly differentiated; Grade III	IB	T2	N0	M0	None/Unknown	No/Unknown	73	Dead	Lobectomy/Bilobectomy	69
White	Male	2004	Moderately differentiated; Grade II	IIIB	T4	N0	M0	Beam radiation	Yes	30	Dead	No Surgery Of Primary Site	65
White	Male	2004	Poorly differentiated; Grade III	IIIA	T2	N2	M0	None/Unknown	Yes	30	Dead	Lobectomy/Bilobectomy	77
White	Female	2004	Moderately differentiated; Grade II	IB	T2	N0	M0	None/Unknown	Yes	14	Dead	No Surgery Of Primary Site	88
White	Male	2004	Moderately differentiated; Grade II	IIIB	T4	N0	M0	None/Unknown	No/Unknown	0	Dead	No Surgery Of Primary Site	79
White	Male	2004	Poorly differentiated; Grade III	IIIA	T2	N2	M0	Beam radiation	No/Unknown	21	Dead	No Surgery Of Primary Site	86
White	Male	2004	Moderately differentiated; Grade II	IB	T2	N0	M0	Beam radiation	No/Unknown	19	Dead	Lobectomy/Bilobectomy	72
White	Male	2004	Poorly differentiated; Grade III	IV	T4	N2	M1	None/Unknown	No/Unknown	1	Dead	No Surgery Of Primary Site	71
White	Female	2004	Unknown	IIIB	T4	N1	M0	None/Unknown	No/Unknown	0	Dead	No Surgery Of Primary Site	85
White	Male	2004	Unknown	IIIB	T4	N2	M0	Beam radiation	No/Unknown	9	Dead	No Surgery Of Primary Site	73
White	Female	2004	Unknown	IV	T2	N1	M1	Beam radiation	No/Unknown	139	Alive	No Surgery Of Primary Site	61
White	Male	2004	Moderately differentiated; Grade II	IB	T2	N0	M0	Beam radiation	No/Unknown	12	Dead	No Surgery Of Primary Site	86
White	Female	2004	Poorly differentiated; Grade III	IV	T4	N0	M1	Beam radiation	Yes	10	Dead	No Surgery Of Primary Site	63
White	Male	2004	Poorly differentiated; Grade III	IIIA	T3	N2	M0	Beam radiation	No/Unknown	17	Dead	No Surgery Of Primary Site	71
White	Female	2004	Poorly differentiated; Grade III	IB	T2	N0	M0	None/Unknown	No/Unknown	13	Dead	Partial/Wedge/Segmental Resec., Lingulectomy, Partial Lobectomy, Sleeve Resec.	89
White	Male	2004	Poorly differentiated; Grade III	IB	T2	N0	M0	Beam radiation	No/Unknown	41	Dead	No Surgery Of Primary Site	84
Other (American Indian/AK Native, Asian/Pacific Islander)	Male	2004	Moderately differentiated; Grade II	IIIA	T2	N2	M0	None/Unknown	Yes	70	Dead	Complete/Total/Standard Pneumonectomy; Pneumonectomy, Nos	58
White	Male	2004	Poorly differentiated; Grade III	IB	T2	N0	M0	None/Unknown	No/Unknown	29	Dead	Partial/Wedge/Segmental Resec., Lingulectomy, Partial Lobectomy, Sleeve Resec.	80
White	Male	2004	Moderately differentiated; Grade II	IB	T2	N0	M0	None/Unknown	No/Unknown	44	Dead	Lobectomy/Bilobectomy	88
White	Female	2004	Poorly differentiated; Grade III	IB	T2	N0	M0	None/Unknown	No/Unknown	132	Dead	Lobectomy/Bilobectomy	69
White	Female	2004	Well differentiated; Grade I	IB	T2	N0	M0	None/Unknown	No/Unknown	1	Dead	Partial/Wedge/Segmental Resec., Lingulectomy, Partial Lobectomy, Sleeve Resec.	79
White	Female	2004	Poorly differentiated; Grade III	IB	T2	N0	M0	None/Unknown	Yes	138	Alive	Lobectomy/Bilobectomy	63
White	Male	2004	Poorly differentiated; Grade III	IB	T2	N0	M0	None/Unknown	Yes	20	Dead	No Surgery Of Primary Site	73
White	Male	2004	Moderately differentiated; Grade II	IB	T2	N0	M0	None/Unknown	No/Unknown	17	Dead	Partial/Wedge/Segmental Resec., Lingulectomy, Partial Lobectomy, Sleeve Resec.	82
White	Female	2004	Poorly differentiated; Grade III	IV	T2	N0	M1	Beam radiation	No/Unknown	36	Dead	No Surgery Of Primary Site	75
White	Female	2004	Unknown	IIB	T3	N0	M0	Beam radiation	No/Unknown	6	Dead	No Surgery Of Primary Site	79
White	Female	2004	Poorly differentiated; Grade III	IIB	T2	N1	M0	None/Unknown	Yes	8	Dead	Lobectomy/Bilobectomy	67
White	Male	2004	Moderately differentiated; Grade II	IB	T2	N0	M0	Beam radiation	Yes	30	Dead	Partial/Wedge/Segmental Resec., Lingulectomy, Partial Lobectomy, Sleeve Resec.	57
White	Female	2004	Moderately differentiated; Grade II	IIIA	T2	N2	M0	Beam radiation	Yes	12	Dead	No Surgery Of Primary Site	72
White	Male	2004	Poorly differentiated; Grade III	IB	T2	N0	M0	None/Unknown	No/Unknown	43	Dead	Partial/Wedge/Segmental Resec., Lingulectomy, Partial Lobectomy, Sleeve Resec.	80
White	Male	2004	Moderately differentiated; Grade II	IB	T2	N0	M0	None/Unknown	No/Unknown	25	Dead	Lobectomy/Bilobectomy	82
White	Male	2004	Moderately differentiated; Grade II	IIIB	T4	N2	M0	None/Unknown	No/Unknown	1	Dead	No Surgery Of Primary Site	71
White	Female	2004	Poorly differentiated; Grade III	IB	T2	N0	M0	None/Unknown	No/Unknown	36	Dead	Lobectomy/Bilobectomy	63
Black	Male	2004	Unknown	IB	T2	N0	M0	Beam radiation	No/Unknown	16	Dead	No Surgery Of Primary Site	78
Black	Female	2004	Poorly differentiated; Grade III	IIIA	T2	N2	M0	None/Unknown	No/Unknown	35	Dead	No Surgery Of Primary Site	75
White	Male	2004	Moderately differentiated; Grade II	IB	T2	N0	M0	None/Unknown	No/Unknown	1	Dead	No Surgery Of Primary Site	53
White	Female	2004	Unknown	IB	T2	N0	M0	Beam radiation	No/Unknown	32	Dead	No Surgery Of Primary Site	79
White	Male	2004	Unknown	IIIA	T2	N2	M0	None/Unknown	No/Unknown	19	Dead	No Surgery Of Primary Site	75
White	Male	2004	Poorly differentiated; Grade III	IV	T2	N0	M1	None/Unknown	Yes	52	Dead	Lobectomy/Bilobectomy	53
White	Male	2004	Moderately differentiated; Grade II	IB	T2	N0	M0	None/Unknown	No/Unknown	25	Dead	Lobectomy/Bilobectomy	74
White	Female	2004	Moderately differentiated; Grade II	IB	T2	N0	M0	None/Unknown	No/Unknown	20	Dead	Partial/Wedge/Segmental Resec., Lingulectomy, Partial Lobectomy, Sleeve Resec.	73
White	Male	2004	Poorly differentiated; Grade III	IIB	T2	N1	M0	None/Unknown	No/Unknown	108	Dead	Radical Pneumonectomy (Complete Pneumonectomy Plus Dissection Of Mediastinal LN)	58
White	Male	2004	Poorly differentiated; Grade III	IIIA	T2	N2	M0	Beam radiation	Yes	8	Dead	Lobectomy/Bilobectomy	75
White	Male	2004	Poorly differentiated; Grade III	IIIA	T2	N2	M0	None/Unknown	No/Unknown	7	Dead	Lobectomy/Bilobectomy	81
White	Male	2004	Moderately differentiated; Grade II	IIB	T3	N0	M0	None/Unknown	No/Unknown	132	Alive	Lobectomy/Bilobectomy	72
White	Male	2004	Poorly differentiated; Grade III	IB	T2	N0	M0	None/Unknown	No/Unknown	68	Dead	Lobectomy/Bilobectomy	70
White	Male	2004	Poorly differentiated; Grade III	IB	T2	N0	M0	None/Unknown	No/Unknown	79	Dead	Lobectomy/Bilobectomy	72
White	Female	2004	Poorly differentiated; Grade III	IV	T2	N2	M1	None/Unknown	Yes	15	Dead	No Surgery Of Primary Site	44
White	Female	2004	Poorly differentiated; Grade III	IB	T2	N0	M0	None/Unknown	No/Unknown	105	Dead	Lobectomy/Bilobectomy	78
White	Male	2004	Poorly differentiated; Grade III	IB	T2	N0	M0	None/Unknown	No/Unknown	8	Dead	Lobectomy/Bilobectomy	75
White	Male	2004	Poorly differentiated; Grade III	IIIA	T2	N2	M0	Beam radiation	Yes	10	Dead	No Surgery Of Primary Site	80
White	Male	2004	Poorly differentiated; Grade III	IB	T2	N0	M0	Beam radiation	No/Unknown	4	Dead	Lobectomy/Bilobectomy	54
White	Female	2004	Poorly differentiated; Grade III	IB	T2	N0	M0	None/Unknown	No/Unknown	1	Dead	Lobectomy/Bilobectomy	78
Other (American Indian/AK Native, Asian/Pacific Islander)	Male	2004	Poorly differentiated; Grade III	IV	T4	N3	M1	Beam radiation	No/Unknown	2	Dead	No Surgery Of Primary Site	58
White	Male	2004	Unknown	IV	T4	N2	M1	Beam radiation	Yes	10	Dead	No Surgery Of Primary Site	46
White	Female	2004	Unknown	IB	T2	N0	M0	None/Unknown	No/Unknown	7	Dead	No Surgery Of Primary Site	76
White	Male	2004	Poorly differentiated; Grade III	IIIA	T2	N2	M0	Beam radiation	Yes	136	Alive	Lobectomy/Bilobectomy	69
White	Male	2004	Unknown	IV	T2	N0	M1	None/Unknown	No/Unknown	4	Dead	No Surgery Of Primary Site	60
White	Male	2004	Unknown	IB	T2	N0	M0	Beam radiation	No/Unknown	55	Dead	No Surgery Of Primary Site	64
Other (American Indian/AK Native, Asian/Pacific Islander)	Male	2004	Moderately differentiated; Grade II	IB	T2	N0	M0	None/Unknown	Yes	132	Alive	Lobectomy/Bilobectomy	55
White	Male	2004	Moderately differentiated; Grade II	IIIA	T2	N2	M0	Beam radiation	Yes	19	Dead	Lobectomy/Bilobectomy	50
White	Male	2004	Unknown	IIIA	T2	N2	M0	Beam radiation	Yes	20	Dead	No Surgery Of Primary Site	72
White	Male	2004	Poorly differentiated; Grade III	IIB	T2	N1	M0	Beam radiation	No/Unknown	104	Dead	Radical Pneumonectomy (Complete Pneumonectomy Plus Dissection Of Mediastinal LN)	62
White	Male	2004	Poorly differentiated; Grade III	IV	T2	N2	M1	Beam radiation	Yes	6	Dead	No Surgery Of Primary Site	69
White	Male	2004	Moderately differentiated; Grade II	IV	T2	N2	M1	Refused	No/Unknown	2	Dead	No Surgery Of Primary Site	65
White	Female	2004	Unknown	IB	T2	N0	M0	Beam radiation	No/Unknown	6	Dead	No Surgery Of Primary Site	82
White	Male	2004	Unknown	IIIA	T2	N2	M0	Beam radiation	No/Unknown	87	Dead	No Surgery Of Primary Site	85
White	Female	2004	Poorly differentiated; Grade III	IB	T2	N0	M0	None/Unknown	No/Unknown	19	Dead	Lobectomy/Bilobectomy	78
Other (American Indian/AK Native, Asian/Pacific Islander)	Male	2004	Poorly differentiated; Grade III	IB	T2	N0	M0	Beam radiation	No/Unknown	13	Dead	No Surgery Of Primary Site	87
White	Male	2004	Moderately differentiated; Grade II	IB	T2	N0	M0	None/Unknown	No/Unknown	10	Dead	No Surgery Of Primary Site	78
White	Male	2004	Well differentiated; Grade I	IIIA	T2	N2	M0	Beam radiation	No/Unknown	8	Dead	No Surgery Of Primary Site	81
White	Male	2004	Unknown	IIIB	T4	N0	M0	None/Unknown	No/Unknown	11	Dead	No Surgery Of Primary Site	75
White	Male	2004	Poorly differentiated; Grade III	IB	T2	N0	M0	None/Unknown	No/Unknown	2	Dead	Lobectomy/Bilobectomy	83
Black	Male	2004	Unknown	IIIB	T4	N2	M0	Beam radiation	Yes	33	Dead	Partial/Wedge/Segmental Resec., Lingulectomy, Partial Lobectomy, Sleeve Resec.	66
White	Male	2004	Unknown	IIIA	T2	N2	M0	Beam radiation	Yes	13	Dead	No Surgery Of Primary Site	70
White	Female	2004	Unknown	IIIB	T2	N3	M0	Beam radiation	Yes	5	Dead	No Surgery Of Primary Site	55
White	Female	2004	Poorly differentiated; Grade III	IB	T2	N0	M0	None/Unknown	No/Unknown	14	Dead	Lobectomy/Bilobectomy	66
Other (American Indian/AK Native, Asian/Pacific Islander)	Male	2004	Poorly differentiated; Grade III	IIIB	T2	N3	M0	Beam radiation	Yes	6	Dead	No Surgery Of Primary Site	62
White	Male	2004	Poorly differentiated; Grade III	IIIA	T2	N2	M0	Beam radiation	Yes	8	Dead	No Surgery Of Primary Site	65
White	Male	2004	Unknown	IV	T2	N1	M1	Refused	No/Unknown	7	Dead	No Surgery Of Primary Site	67
White	Female	2004	Unknown	IB	T2	N0	M0	None/Unknown	No/Unknown	74	Dead	Lobectomy/Bilobectomy	72
White	Male	2004	Moderately differentiated; Grade II	IIIA	T3	N1	M0	None/Unknown	No/Unknown	0	Dead	Partial/Wedge/Segmental Resec., Lingulectomy, Partial Lobectomy, Sleeve Resec.	74
White	Male	2004	Unknown	IV	T2	N2	M1	Beam radiation	Yes	4	Dead	No Surgery Of Primary Site	62
White	Male	2004	Poorly differentiated; Grade III	IB	T2	N0	M0	Beam radiation	No/Unknown	7	Dead	No Surgery Of Primary Site	73
White	Female	2004	Moderately differentiated; Grade II	IB	T2	N0	M0	None/Unknown	No/Unknown	64	Dead	Lobectomy/Bilobectomy	65
White	Male	2004	Poorly differentiated; Grade III	IIIA	T2	N2	M0	None/Unknown	Yes	12	Dead	Lobectomy/Bilobectomy	69
Black	Male	2004	Unknown	IB	T2	N0	M0	None/Unknown	No/Unknown	20	Dead	No Surgery Of Primary Site	61
White	Female	2004	Unknown	IB	T2	N0	M0	None/Unknown	No/Unknown	60	Dead	Lobectomy/Bilobectomy	79
White	Female	2004	Poorly differentiated; Grade III	IB	T2	N0	M0	None/Unknown	No/Unknown	32	Dead	No Surgery Of Primary Site	84
White	Female	2004	Unknown	IIB	T2	N1	M0	Beam radiation	No/Unknown	10	Dead	No Surgery Of Primary Site	81
White	Female	2004	Unknown	IB	T2	N0	M0	None/Unknown	No/Unknown	25	Dead	No Surgery Of Primary Site	67
White	Male	2004	Poorly differentiated; Grade III	IA	T1	N0	M0	None/Unknown	No/Unknown	72	Dead	Complete/Total/Standard Pneumonectomy; Pneumonectomy, Nos	67
White	Female	2004	Unknown	IB	T2	N0	M0	Beam radiation	No/Unknown	5	Dead	No Surgery Of Primary Site	82
[truncated: 88,007 more rows]
