# Supplementary material for: Clinical characteristics and prognosis of basaloid squamous cell carcinoma of the lung: a population-based analysis
Source: PeerJ. 2019 Apr 30;7:e6724. doi: 10.7717/peerj.6724 (PMC6499056; doi:10.7717/peerj.6724)
Supplement: Data S4 [file peerj-07-6724-s006.xlsx]

## Sheet: Sheet1
Race	Sex	Year of diagnosis	Grade	AJCC Stage	AJCC T	AJCC N	AJCC M	Radiation	Chemotherapy	Survival months	OS	Age at diagnosis	Lung - Surgery to Primary Site (1988-2015)
White	Male	2004	Well differentiated; Grade I	IA	T1	N0	M0	None/Unknown	Yes	9	Dead	65	Complete/Total/Standard Pneumonectomy; Pneumonectomy, Nos
White	Female	2004	Moderately differentiated; Grade II	IA	T1	N0	M0	None/Unknown	No/Unknown	27	Dead	62	Complete/Total/Standard Pneumonectomy; Pneumonectomy, Nos
White	Female	2004	Moderately differentiated; Grade II	IA	T1	N0	M0	None/Unknown	No/Unknown	20	Dead	68	Complete/Total/Standard Pneumonectomy; Pneumonectomy, Nos
White	Female	2004	Moderately differentiated; Grade II	IA	T1	N0	M0	None/Unknown	Yes	141	Alive	64	Complete/Total/Standard Pneumonectomy; Pneumonectomy, Nos
White	Male	2004	Moderately differentiated; Grade II	IA	T1	N0	M0	None/Unknown	No/Unknown	134	Alive	67	Complete/Total/Standard Pneumonectomy; Pneumonectomy, Nos
White	Female	2004	Moderately differentiated; Grade II	IA	T1	N0	M0	None/Unknown	No/Unknown	126	Alive	51	Complete/Total/Standard Pneumonectomy; Pneumonectomy, Nos
White	Female	2004	Poorly differentiated; Grade III	IA	T1	N0	M0	None/Unknown	No/Unknown	71	Dead	60	Complete/Total/Standard Pneumonectomy; Pneumonectomy, Nos
White	Female	2004	Unknown	IA	T1	N0	M0	None/Unknown	No/Unknown	133	Alive	65	Complete/Total/Standard Pneumonectomy; Pneumonectomy, Nos
White	Male	2004	Well differentiated; Grade I	IA	T1	N0	M0	None/Unknown	No/Unknown	39	Dead	65	Complete/Total/Standard Pneumonectomy; Pneumonectomy, Nos
White	Female	2004	Moderately differentiated; Grade II	IA	T1	N0	M0	None/Unknown	No/Unknown	1	Dead	69	Complete/Total/Standard Pneumonectomy; Pneumonectomy, Nos
White	Female	2005	Moderately differentiated; Grade II	IA	T1	N0	M0	None/Unknown	No/Unknown	1	Dead	81	Complete/Total/Standard Pneumonectomy; Pneumonectomy, Nos
White	Male	2005	Poorly differentiated; Grade III	IA	T1	N0	M0	None/Unknown	No/Unknown	7	Dead	73	Complete/Total/Standard Pneumonectomy; Pneumonectomy, Nos
White	Female	2005	Undifferentiated; anaplastic; Grade IV	IA	T1	N0	M0	None/Unknown	No/Unknown	48	Dead	45	Complete/Total/Standard Pneumonectomy; Pneumonectomy, Nos
White	Male	2005	Moderately differentiated; Grade II	IA	T1	N0	M0	None/Unknown	Yes	31	Dead	63	Complete/Total/Standard Pneumonectomy; Pneumonectomy, Nos
White	Female	2005	Moderately differentiated; Grade II	IA	T1	N0	M0	None/Unknown	No/Unknown	1	Dead	72	Complete/Total/Standard Pneumonectomy; Pneumonectomy, Nos
White	Male	2005	Poorly differentiated; Grade III	IA	T1	N0	M0	None/Unknown	No/Unknown	24	Dead	66	Complete/Total/Standard Pneumonectomy; Pneumonectomy, Nos
White	Male	2005	Moderately differentiated; Grade II	IA	T1	N0	M0	None/Unknown	No/Unknown	1	Dead	74	Complete/Total/Standard Pneumonectomy; Pneumonectomy, Nos
White	Male	2006	Moderately differentiated; Grade II	IA	T1	N0	M0	None/Unknown	No/Unknown	9	Dead	66	Complete/Total/Standard Pneumonectomy; Pneumonectomy, Nos
White	Female	2006	Well differentiated; Grade I	IA	T1	N0	M0	None/Unknown	No/Unknown	118	Alive	51	Complete/Total/Standard Pneumonectomy; Pneumonectomy, Nos
White	Female	2006	Moderately differentiated; Grade II	IA	T1	N0	M0	None/Unknown	No/Unknown	114	Alive	66	Complete/Total/Standard Pneumonectomy; Pneumonectomy, Nos
Black	Male	2006	Moderately differentiated; Grade II	IA	T1	N0	M0	None/Unknown	Yes	4	Dead	52	Complete/Total/Standard Pneumonectomy; Pneumonectomy, Nos
White	Female	2007	Unknown	IA	T1	N0	M0	None/Unknown	No/Unknown	106	Alive	67	Complete/Total/Standard Pneumonectomy; Pneumonectomy, Nos
Black	Male	2007	Moderately differentiated; Grade II	IA	T1	N0	M0	None/Unknown	No/Unknown	105	Alive	72	Complete/Total/Standard Pneumonectomy; Pneumonectomy, Nos
White	Male	2007	Well differentiated; Grade I	IA	T1	N0	M0	None/Unknown	No/Unknown	2	Dead	71	Complete/Total/Standard Pneumonectomy; Pneumonectomy, Nos
White	Male	2007	Moderately differentiated; Grade II	IA	T1	N0	M0	None/Unknown	Yes	7	Dead	62	Complete/Total/Standard Pneumonectomy; Pneumonectomy, Nos
White	Female	2007	Moderately differentiated; Grade II	IA	T1	N0	M0	None/Unknown	No/Unknown	35	Dead	65	Complete/Total/Standard Pneumonectomy; Pneumonectomy, Nos
White	Male	2007	Unknown	IA	T1	N0	M0	None/Unknown	No/Unknown	66	Dead	74	Complete/Total/Standard Pneumonectomy; Pneumonectomy, Nos
White	Female	2008	Well differentiated; Grade I	IA	T1	N0	M0	None/Unknown	No/Unknown	86	Alive	81	Complete/Total/Standard Pneumonectomy; Pneumonectomy, Nos
White	Male	2008	Moderately differentiated; Grade II	IA	T1	N0	M0	None/Unknown	No/Unknown	18	Dead	54	Complete/Total/Standard Pneumonectomy; Pneumonectomy, Nos
White	Male	2008	Poorly differentiated; Grade III	IA	T1	N0	M0	None/Unknown	No/Unknown	5	Dead	67	Complete/Total/Standard Pneumonectomy; Pneumonectomy, Nos
White	Female	2008	Moderately differentiated; Grade II	IA	T1	N0	M0	None/Unknown	No/Unknown	4	Dead	81	Complete/Total/Standard Pneumonectomy; Pneumonectomy, Nos
White	Female	2008	Poorly differentiated; Grade III	IA	T1	N0	M0	None/Unknown	Yes	34	Dead	56	Complete/Total/Standard Pneumonectomy; Pneumonectomy, Nos
Other (American Indian/AK Native, Asian/Pacific Islander)	Female	2009	Well differentiated; Grade I	IA	T1	N0	M0	None/Unknown	Yes	75	Alive	67	Complete/Total/Standard Pneumonectomy; Pneumonectomy, Nos
White	Female	2009	Poorly differentiated; Grade III	IA	T1	N0	M0	None/Unknown	No/Unknown	71	Dead	54	Complete/Total/Standard Pneumonectomy; Pneumonectomy, Nos
White	Female	2009	Moderately differentiated; Grade II	IA	T1	N0	M0	None/Unknown	No/Unknown	81	Alive	64	Complete/Total/Standard Pneumonectomy; Pneumonectomy, Nos
White	Female	2009	Moderately differentiated; Grade II	IA	T1	N0	M0	None/Unknown	No/Unknown	6	Dead	69	Complete/Total/Standard Pneumonectomy; Pneumonectomy, Nos
White	Male	2009	Well differentiated; Grade I	IA	T1	N0	M0	None/Unknown	No/Unknown	77	Alive	60	Complete/Total/Standard Pneumonectomy; Pneumonectomy, Nos
White	Male	2004	Moderately differentiated; Grade II	IV	T1	N0	M1	None/Unknown	Yes	136	Alive	68	Complete/Total/Standard Pneumonectomy; Pneumonectomy, Nos
White	Male	2008	Moderately differentiated; Grade II	IV	T1	N0	M1	None/Unknown	No/Unknown	2	Dead	73	Complete/Total/Standard Pneumonectomy; Pneumonectomy, Nos
White	Female	2009	Moderately differentiated; Grade II	IV	T1	N0	M1	None/Unknown	No/Unknown	1	Dead	65	Complete/Total/Standard Pneumonectomy; Pneumonectomy, Nos
White	Male	2010	Moderately differentiated; Grade II	IA	T1a	N0	M0	None/Unknown	No/Unknown	3	Dead	83	Complete/Total/Standard Pneumonectomy; Pneumonectomy, Nos
White	Female	2010	Poorly differentiated; Grade III	IA	T1a	N0	M0	None/Unknown	No/Unknown	6	Dead	77	Complete/Total/Standard Pneumonectomy; Pneumonectomy, Nos
White	Male	2012	Moderately differentiated; Grade II	IA	T1a	N0	M0	None/Unknown	No/Unknown	44	Alive	55	Complete/Total/Standard Pneumonectomy; Pneumonectomy, Nos
White	Male	2012	Moderately differentiated; Grade II	IA	T1a	N0	M0	None/Unknown	Yes	44	Alive	53	Complete/Total/Standard Pneumonectomy; Pneumonectomy, Nos
White	Male	2014	Well differentiated; Grade I	IA	T1a	N0	M0	None/Unknown	Yes	5	Dead	71	Complete/Total/Standard Pneumonectomy; Pneumonectomy, Nos
White	Female	2015	Poorly differentiated; Grade III	IA	T1a	N0	M0	None/Unknown	No/Unknown	6	Alive	59	Complete/Total/Standard Pneumonectomy; Pneumonectomy, Nos
White	Male	2015	Unknown	IA	T1a	N0	M0	None/Unknown	No/Unknown	2	Dead	73	Complete/Total/Standard Pneumonectomy; Pneumonectomy, Nos
Black	Female	2010	Moderately differentiated; Grade II	IA	T1b	N0	M0	None/Unknown	No/Unknown	69	Alive	62	Complete/Total/Standard Pneumonectomy; Pneumonectomy, Nos
White	Female	2011	Well differentiated; Grade I	IA	T1b	N0	M0	None/Unknown	No/Unknown	54	Alive	72	Complete/Total/Standard Pneumonectomy; Pneumonectomy, Nos
Black	Male	2012	Poorly differentiated; Grade III	IA	T1b	N0	M0	None/Unknown	No/Unknown	13	Dead	67	Complete/Total/Standard Pneumonectomy; Pneumonectomy, Nos
White	Male	2013	Poorly differentiated; Grade III	IA	T1b	N0	M0	None/Unknown	No/Unknown	20	Dead	52	Complete/Total/Standard Pneumonectomy; Pneumonectomy, Nos
White	Female	2014	Moderately differentiated; Grade II	IA	T1b	N0	M0	None/Unknown	No/Unknown	12	Alive	73	Complete/Total/Standard Pneumonectomy; Pneumonectomy, Nos
Other (American Indian/AK Native, Asian/Pacific Islander)	Male	2014	Moderately differentiated; Grade II	IA	T1b	N0	M0	None/Unknown	No/Unknown	7	Alive	71	Complete/Total/Standard Pneumonectomy; Pneumonectomy, Nos
White	Male	2014	Poorly differentiated; Grade III	IA	T1b	N0	M0	None/Unknown	No/Unknown	15	Alive	76	Complete/Total/Standard Pneumonectomy; Pneumonectomy, Nos
Other (American Indian/AK Native, Asian/Pacific Islander)	Female	2004	Moderately differentiated; Grade II	IB	T2	N0	M0	None/Unknown	Yes	126	Alive	68	Complete/Total/Standard Pneumonectomy; Pneumonectomy, Nos
White	Male	2004	Moderately differentiated; Grade II	IB	T2	N0	M0	Beam radiation	Yes	8	Dead	46	Complete/Total/Standard Pneumonectomy; Pneumonectomy, Nos
White	Male	2004	Poorly differentiated; Grade III	IB	T2	N0	M0	None/Unknown	No/Unknown	19	Dead	81	Complete/Total/Standard Pneumonectomy; Pneumonectomy, Nos
White	Female	2004	Moderately differentiated; Grade II	IB	T2	N0	M0	None/Unknown	No/Unknown	38	Dead	61	Complete/Total/Standard Pneumonectomy; Pneumonectomy, Nos
White	Female	2004	Well differentiated; Grade I	IB	T2	N0	M0	None/Unknown	No/Unknown	123	Alive	71	Complete/Total/Standard Pneumonectomy; Pneumonectomy, Nos
White	Female	2004	Poorly differentiated; Grade III	IB	T2	N0	M0	None/Unknown	Yes	9	Dead	66	Complete/Total/Standard Pneumonectomy; Pneumonectomy, Nos
White	Female	2004	Moderately differentiated; Grade II	IB	T2	N0	M0	None/Unknown	No/Unknown	30	Dead	80	Complete/Total/Standard Pneumonectomy; Pneumonectomy, Nos
White	Female	2004	Poorly differentiated; Grade III	IB	T2	N0	M0	None/Unknown	No/Unknown	1	Dead	74	Complete/Total/Standard Pneumonectomy; Pneumonectomy, Nos
Black	Female	2004	Poorly differentiated; Grade III	IB	T2	N0	M0	None/Unknown	No/Unknown	101	Dead	70	Complete/Total/Standard Pneumonectomy; Pneumonectomy, Nos
White	Male	2004	Moderately differentiated; Grade II	IB	T2	N0	M0	None/Unknown	No/Unknown	6	Dead	73	Complete/Total/Standard Pneumonectomy; Pneumonectomy, Nos
White	Male	2004	Poorly differentiated; Grade III	IB	T2	N0	M0	None/Unknown	Yes	136	Alive	66	Complete/Total/Standard Pneumonectomy; Pneumonectomy, Nos
White	Male	2004	Poorly differentiated; Grade III	IB	T2	N0	M0	None/Unknown	No/Unknown	132	Alive	68	Complete/Total/Standard Pneumonectomy; Pneumonectomy, Nos
White	Male	2005	Moderately differentiated; Grade II	IB	T2	N0	M0	None/Unknown	No/Unknown	6	Dead	70	Complete/Total/Standard Pneumonectomy; Pneumonectomy, Nos
White	Female	2005	Well differentiated; Grade I	IB	T2	N0	M0	None/Unknown	No/Unknown	45	Dead	92	Complete/Total/Standard Pneumonectomy; Pneumonectomy, Nos
Black	Male	2005	Moderately differentiated; Grade II	IB	T2	N0	M0	None/Unknown	No/Unknown	39	Dead	58	Complete/Total/Standard Pneumonectomy; Pneumonectomy, Nos
White	Female	2005	Poorly differentiated; Grade III	IB	T2	N0	M0	None/Unknown	No/Unknown	3	Dead	71	Complete/Total/Standard Pneumonectomy; Pneumonectomy, Nos
White	Male	2005	Moderately differentiated; Grade II	IB	T2	N0	M0	None/Unknown	No/Unknown	47	Dead	80	Complete/Total/Standard Pneumonectomy; Pneumonectomy, Nos
White	Female	2005	Well differentiated; Grade I	IB	T2	N0	M0	None/Unknown	No/Unknown	9	Dead	53	Complete/Total/Standard Pneumonectomy; Pneumonectomy, Nos
White	Male	2005	Poorly differentiated; Grade III	IB	T2	N0	M0	None/Unknown	No/Unknown	5	Dead	73	Complete/Total/Standard Pneumonectomy; Pneumonectomy, Nos
White	Male	2005	Poorly differentiated; Grade III	IB	T2	N0	M0	Beam radiation	Yes	7	Dead	60	Complete/Total/Standard Pneumonectomy; Pneumonectomy, Nos
White	Male	2005	Unknown	IB	T2	N0	M0	None/Unknown	No/Unknown	72	Dead	80	Complete/Total/Standard Pneumonectomy; Pneumonectomy, Nos
White	Male	2005	Poorly differentiated; Grade III	IB	T2	N0	M0	None/Unknown	Yes	32	Dead	63	Complete/Total/Standard Pneumonectomy; Pneumonectomy, Nos
Black	Male	2005	Poorly differentiated; Grade III	IB	T2	N0	M0	None/Unknown	No/Unknown	123	Alive	54	Complete/Total/Standard Pneumonectomy; Pneumonectomy, Nos
White	Male	2005	Moderately differentiated; Grade II	IB	T2	N0	M0	None/Unknown	No/Unknown	87	Dead	69	Complete/Total/Standard Pneumonectomy; Pneumonectomy, Nos
White	Male	2005	Poorly differentiated; Grade III	IB	T2	N0	M0	None/Unknown	No/Unknown	87	Dead	69	Complete/Total/Standard Pneumonectomy; Pneumonectomy, Nos
White	Male	2005	Unknown	IB	T2	N0	M0	None/Unknown	No/Unknown	107	Dead	74	Complete/Total/Standard Pneumonectomy; Pneumonectomy, Nos
Black	Male	2006	Poorly differentiated; Grade III	IB	T2	N0	M0	None/Unknown	Yes	27	Dead	51	Complete/Total/Standard Pneumonectomy; Pneumonectomy, Nos
White	Female	2006	Moderately differentiated; Grade II	IB	T2	N0	M0	Beam radiation	No/Unknown	116	Alive	78	Complete/Total/Standard Pneumonectomy; Pneumonectomy, Nos
White	Male	2006	Moderately differentiated; Grade II	IB	T2	N0	M0	None/Unknown	Yes	111	Alive	60	Complete/Total/Standard Pneumonectomy; Pneumonectomy, Nos
White	Male	2006	Poorly differentiated; Grade III	IB	T2	N0	M0	None/Unknown	No/Unknown	63	Dead	62	Complete/Total/Standard Pneumonectomy; Pneumonectomy, Nos
Black	Male	2006	Moderately differentiated; Grade II	IB	T2	N0	M0	None/Unknown	Yes	6	Dead	52	Complete/Total/Standard Pneumonectomy; Pneumonectomy, Nos
White	Male	2006	Poorly differentiated; Grade III	IB	T2	N0	M0	None/Unknown	No/Unknown	11	Dead	79	Complete/Total/Standard Pneumonectomy; Pneumonectomy, Nos
Black	Male	2006	Poorly differentiated; Grade III	IB	T2	N0	M0	None/Unknown	No/Unknown	105	Dead	54	Complete/Total/Standard Pneumonectomy; Pneumonectomy, Nos
Black	Female	2006	Poorly differentiated; Grade III	IB	T2	N0	M0	Beam radiation	Yes	64	Dead	79	Complete/Total/Standard Pneumonectomy; Pneumonectomy, Nos
White	Female	2007	Poorly differentiated; Grade III	IB	T2	N0	M0	None/Unknown	No/Unknown	93	Dead	71	Complete/Total/Standard Pneumonectomy; Pneumonectomy, Nos
White	Female	2007	Moderately differentiated; Grade II	IB	T2	N0	M0	None/Unknown	No/Unknown	0	Dead	50	Complete/Total/Standard Pneumonectomy; Pneumonectomy, Nos
White	Female	2007	Poorly differentiated; Grade III	IB	T2	N0	M0	None/Unknown	Yes	98	Alive	48	Complete/Total/Standard Pneumonectomy; Pneumonectomy, Nos
White	Female	2007	Moderately differentiated; Grade II	IB	T2	N0	M0	None/Unknown	No/Unknown	105	Alive	67	Complete/Total/Standard Pneumonectomy; Pneumonectomy, Nos
White	Female	2007	Moderately differentiated; Grade II	IB	T2	N0	M0	None/Unknown	No/Unknown	8	Dead	71	Complete/Total/Standard Pneumonectomy; Pneumonectomy, Nos
White	Male	2007	Poorly differentiated; Grade III	IB	T2	N0	M0	None/Unknown	No/Unknown	36	Dead	60	Complete/Total/Standard Pneumonectomy; Pneumonectomy, Nos
White	Male	2007	Poorly differentiated; Grade III	IB	T2	N0	M0	None/Unknown	Yes	4	Dead	61	Complete/Total/Standard Pneumonectomy; Pneumonectomy, Nos
White	Female	2008	Moderately differentiated; Grade II	IB	T2	N0	M0	None/Unknown	No/Unknown	32	Dead	76	Complete/Total/Standard Pneumonectomy; Pneumonectomy, Nos
White	Female	2008	Moderately differentiated; Grade II	IB	T2	N0	M0	None/Unknown	No/Unknown	67	Dead	50	Complete/Total/Standard Pneumonectomy; Pneumonectomy, Nos
Black	Male	2008	Unknown	IB	T2	N0	M0	Beam radiation	Yes	56	Alive	54	Complete/Total/Standard Pneumonectomy; Pneumonectomy, Nos
Other (American Indian/AK Native, Asian/Pacific Islander)	Female	2008	Moderately differentiated; Grade II	IB	T2	N0	M0	None/Unknown	No/Unknown	86	Alive	55	Complete/Total/Standard Pneumonectomy; Pneumonectomy, Nos
Black	Male	2008	Poorly differentiated; Grade III	IB	T2	N0	M0	None/Unknown	No/Unknown	33	Dead	60	Complete/Total/Standard Pneumonectomy; Pneumonectomy, Nos
White	Male	2008	Poorly differentiated; Grade III	IB	T2	N0	M0	None/Unknown	Yes	20	Dead	65	Complete/Total/Standard Pneumonectomy; Pneumonectomy, Nos
White	Female	2008	Poorly differentiated; Grade III	IB	T2	N0	M0	None/Unknown	Yes	57	Dead	51	Complete/Total/Standard Pneumonectomy; Pneumonectomy, Nos
Other (American Indian/AK Native, Asian/Pacific Islander)	Female	2009	Moderately differentiated; Grade II	IB	T2	N0	M0	None/Unknown	No/Unknown	36	Dead	59	Complete/Total/Standard Pneumonectomy; Pneumonectomy, Nos
White	Female	2009	Poorly differentiated; Grade III	IB	T2	N0	M0	None/Unknown	No/Unknown	2	Dead	67	Complete/Total/Standard Pneumonectomy; Pneumonectomy, Nos
White	Female	2009	Poorly differentiated; Grade III	IB	T2	N0	M0	None/Unknown	No/Unknown	2	Dead	65	Complete/Total/Standard Pneumonectomy; Pneumonectomy, Nos
White	Female	2009	Moderately differentiated; Grade II	IB	T2	N0	M0	None/Unknown	No/Unknown	26	Dead	80	Complete/Total/Standard Pneumonectomy; Pneumonectomy, Nos
White	Male	2009	Poorly differentiated; Grade III	IB	T2	N0	M0	None/Unknown	No/Unknown	75	Alive	77	Complete/Total/Standard Pneumonectomy; Pneumonectomy, Nos
White	Female	2009	Moderately differentiated; Grade II	IB	T2	N0	M0	None/Unknown	No/Unknown	23	Dead	71	Complete/Total/Standard Pneumonectomy; Pneumonectomy, Nos
White	Female	2009	Moderately differentiated; Grade II	IB	T2	N0	M0	None/Unknown	Yes	82	Alive	61	Complete/Total/Standard Pneumonectomy; Pneumonectomy, Nos
White	Female	2009	Poorly differentiated; Grade III	IB	T2	N0	M0	None/Unknown	No/Unknown	34	Dead	64	Complete/Total/Standard Pneumonectomy; Pneumonectomy, Nos
White	Male	2005	Poorly differentiated; Grade III	IV	T2	N0	M1	None/Unknown	No/Unknown	41	Dead	68	Complete/Total/Standard Pneumonectomy; Pneumonectomy, Nos
White	Female	2005	Poorly differentiated; Grade III	IV	T2	N0	M1	None/Unknown	No/Unknown	35	Dead	60	Complete/Total/Standard Pneumonectomy; Pneumonectomy, Nos
Black	Male	2006	Poorly differentiated; Grade III	IV	T2	N0	M1	Beam radiation	Yes	10	Dead	43	Complete/Total/Standard Pneumonectomy; Pneumonectomy, Nos
White	Male	2006	Poorly differentiated; Grade III	IV	T2	N0	M1	None/Unknown	Yes	19	Dead	50	Complete/Total/Standard Pneumonectomy; Pneumonectomy, Nos
White	Female	2006	Unknown	IV	T2	N0	M1	Beam radiation	Yes	4	Dead	71	Complete/Total/Standard Pneumonectomy; Pneumonectomy, Nos
White	Female	2007	Poorly differentiated; Grade III	IV	T2	N0	M1	None/Unknown	Yes	14	Dead	42	Complete/Total/Standard Pneumonectomy; Pneumonectomy, Nos
Black	Male	2010	Poorly differentiated; Grade III	IB	T2a	N0	M0	None/Unknown	No/Unknown	2	Dead	67	Complete/Total/Standard Pneumonectomy; Pneumonectomy, Nos
White	Female	2010	Moderately differentiated; Grade II	IB	T2a	N0	M0	None/Unknown	Yes	70	Alive	53	Complete/Total/Standard Pneumonectomy; Pneumonectomy, Nos
White	Female	2010	Moderately differentiated; Grade II	IB	T2a	N0	M0	None/Unknown	No/Unknown	36	Dead	60	Complete/Total/Standard Pneumonectomy; Pneumonectomy, Nos
White	Female	2010	Poorly differentiated; Grade III	IB	T2a	N0	M0	None/Unknown	No/Unknown	34	Alive	48	Complete/Total/Standard Pneumonectomy; Pneumonectomy, Nos
White	Male	2010	Moderately differentiated; Grade II	IB	T2a	N0	M0	None/Unknown	No/Unknown	40	Dead	72	Complete/Total/Standard Pneumonectomy; Pneumonectomy, Nos
White	Female	2010	Poorly differentiated; Grade III	IB	T2a	N0	M0	None/Unknown	No/Unknown	40	Dead	78	Complete/Total/Standard Pneumonectomy; Pneumonectomy, Nos
White	Female	2010	Moderately differentiated; Grade II	IB	T2a	N0	M0	None/Unknown	Yes	65	Alive	55	Complete/Total/Standard Pneumonectomy; Pneumonectomy, Nos
Black	Male	2010	Poorly differentiated; Grade III	IB	T2a	N0	M0	None/Unknown	No/Unknown	70	Alive	50	Complete/Total/Standard Pneumonectomy; Pneumonectomy, Nos
Other (American Indian/AK Native, Asian/Pacific Islander)	Female	2011	Well differentiated; Grade I	IB	T2a	N0	M0	None/Unknown	No/Unknown	53	Alive	65	Complete/Total/Standard Pneumonectomy; Pneumonectomy, Nos
Other (American Indian/AK Native, Asian/Pacific Islander)	Female	2011	Poorly differentiated; Grade III	IB	T2a	N0	M0	None/Unknown	Yes	48	Alive	66	Complete/Total/Standard Pneumonectomy; Pneumonectomy, Nos
White	Male	2011	Poorly differentiated; Grade III	IB	T2a	N0	M0	None/Unknown	Yes	8	Dead	73	Complete/Total/Standard Pneumonectomy; Pneumonectomy, Nos
White	Female	2011	Moderately differentiated; Grade II	IB	T2a	N0	M0	None/Unknown	No/Unknown	38	Alive	51	Complete/Total/Standard Pneumonectomy; Pneumonectomy, Nos
White	Male	2011	Moderately differentiated; Grade II	IB	T2a	N0	M0	None/Unknown	No/Unknown	49	Alive	68	Complete/Total/Standard Pneumonectomy; Pneumonectomy, Nos
White	Female	2012	Well differentiated; Grade I	IB	T2a	N0	M0	None/Unknown	No/Unknown	38	Dead	58	Complete/Total/Standard Pneumonectomy; Pneumonectomy, Nos
White	Female	2012	Poorly differentiated; Grade III	IB	T2a	N0	M0	None/Unknown	No/Unknown	37	Alive	71	Complete/Total/Standard Pneumonectomy; Pneumonectomy, Nos
White	Male	2012	Well differentiated; Grade I	IB	T2a	N0	M0	None/Unknown	No/Unknown	42	Alive	64	Complete/Total/Standard Pneumonectomy; Pneumonectomy, Nos
White	Female	2013	Moderately differentiated; Grade II	IB	T2a	N0	M0	None/Unknown	No/Unknown	26	Alive	61	Complete/Total/Standard Pneumonectomy; Pneumonectomy, Nos
White	Female	2013	Moderately differentiated; Grade II	IB	T2a	N0	M0	None/Unknown	Yes	35	Alive	57	Complete/Total/Standard Pneumonectomy; Pneumonectomy, Nos
Black	Female	2013	Moderately differentiated; Grade II	IB	T2a	N0	M0	None/Unknown	No/Unknown	6	Dead	77	Complete/Total/Standard Pneumonectomy; Pneumonectomy, Nos
White	Female	2013	Moderately differentiated; Grade II	IB	T2a	N0	M0	None/Unknown	Yes	14	Alive	51	Complete/Total/Standard Pneumonectomy; Pneumonectomy, Nos
White	Male	2014	Poorly differentiated; Grade III	IB	T2a	N0	M0	None/Unknown	No/Unknown	17	Alive	70	Complete/Total/Standard Pneumonectomy; Pneumonectomy, Nos
White	Male	2014	Moderately differentiated; Grade II	IB	T2a	N0	M0	None/Unknown	Yes	19	Alive	66	Complete/Total/Standard Pneumonectomy; Pneumonectomy, Nos
Other (American Indian/AK Native, Asian/Pacific Islander)	Female	2015	Poorly differentiated; Grade III	IB	T2a	N0	M0	None/Unknown	No/Unknown	10	Alive	59	Complete/Total/Standard Pneumonectomy; Pneumonectomy, Nos
White	Female	2015	Moderately differentiated; Grade II	IB	T2a	N0	M0	None/Unknown	No/Unknown	11	Alive	79	Complete/Total/Standard Pneumonectomy; Pneumonectomy, Nos
White	Male	2015	Moderately differentiated; Grade II	IB	T2a	N0	M0	None/Unknown	Yes	9	Alive	64	Complete/Total/Standard Pneumonectomy; Pneumonectomy, Nos
White	Female	2015	Moderately differentiated; Grade II	IB	T2a	N0	M0	None/Unknown	No/Unknown	8	Alive	71	Complete/Total/Standard Pneumonectomy; Pneumonectomy, Nos
White	Male	2015	Moderately differentiated; Grade II	IB	T2a	N0	M0	Beam radiation	Yes	4	Alive	65	Complete/Total/Standard Pneumonectomy; Pneumonectomy, Nos
White	Male	2015	Poorly differentiated; Grade III	IB	T2a	N0	M0	None/Unknown	Yes	8	Alive	72	Complete/Total/Standard Pneumonectomy; Pneumonectomy, Nos
White	Male	2010	Moderately differentiated; Grade II	IV	T2a	N0	M1a	None/Unknown	Yes	27	Dead	67	Complete/Total/Standard Pneumonectomy; Pneumonectomy, Nos
White	Male	2014	Moderately differentiated; Grade II	IV	T2a	N0	M1a	None/Unknown	Yes	22	Alive	69	Complete/Total/Standard Pneumonectomy; Pneumonectomy, Nos
Black	Female	2010	Moderately differentiated; Grade II	IIA	T2b	N0	M0	None/Unknown	No/Unknown	0	Dead	59	Complete/Total/Standard Pneumonectomy; Pneumonectomy, Nos
Other (American Indian/AK Native, Asian/Pacific Islander)	Female	2011	Poorly differentiated; Grade III	IIA	T2b	N0	M0	None/Unknown	Yes	42	Alive	58	Complete/Total/Standard Pneumonectomy; Pneumonectomy, Nos
White	Female	2012	Moderately differentiated; Grade II	IIA	T2b	N0	M0	None/Unknown	No/Unknown	46	Alive	76	Complete/Total/Standard Pneumonectomy; Pneumonectomy, Nos
White	Male	2012	Moderately differentiated; Grade II	IIA	T2b	N0	M0	None/Unknown	Yes	46	Alive	50	Complete/Total/Standard Pneumonectomy; Pneumonectomy, Nos
White	Male	2012	Poorly differentiated; Grade III	IIA	T2b	N0	M0	None/Unknown	No/Unknown	14	Dead	62	Complete/Total/Standard Pneumonectomy; Pneumonectomy, Nos
White	Male	2014	Moderately differentiated; Grade II	IIA	T2b	N0	M0	None/Unknown	Yes	20	Alive	60	Complete/Total/Standard Pneumonectomy; Pneumonectomy, Nos
White	Male	2015	Unknown	IIA	T2b	N0	M0	Beam radiation	Yes	7	Alive	58	Complete/Total/Standard Pneumonectomy; Pneumonectomy, Nos
White	Female	2015	Well differentiated; Grade I	IIA	T2b	N0	M0	None/Unknown	No/Unknown	1	Alive	75	Complete/Total/Standard Pneumonectomy; Pneumonectomy, Nos
White	Female	2012	Moderately differentiated; Grade II	IV	T2b	N0	M1a	None/Unknown	No/Unknown	34	Dead	83	Complete/Total/Standard Pneumonectomy; Pneumonectomy, Nos
Other (American Indian/AK Native, Asian/Pacific Islander)	Male	2004	Poorly differentiated; Grade III	IIB	T3	N0	M0	Beam radiation	Yes	15	Dead	54	Complete/Total/Standard Pneumonectomy; Pneumonectomy, Nos
White	Male	2004	Moderately differentiated; Grade II	IIB	T3	N0	M0	Beam radiation	No/Unknown	73	Dead	80	Complete/Total/Standard Pneumonectomy; Pneumonectomy, Nos
White	Female	2004	Poorly differentiated; Grade III	IIB	T3	N0	M0	None/Unknown	Yes	136	Dead	59	Complete/Total/Standard Pneumonectomy; Pneumonectomy, Nos
White	Male	2005	Poorly differentiated; Grade III	IIB	T3	N0	M0	None/Unknown	Yes	113	Alive	53	Complete/Total/Standard Pneumonectomy; Pneumonectomy, Nos
White	Male	2006	Poorly differentiated; Grade III	IIB	T3	N0	M0	None/Unknown	Yes	86	Dead	68	Complete/Total/Standard Pneumonectomy; Pneumonectomy, Nos
Black	Male	2007	Poorly differentiated; Grade III	IIB	T3	N0	M0	None/Unknown	No/Unknown	25	Dead	60	Complete/Total/Standard Pneumonectomy; Pneumonectomy, Nos
Other (American Indian/AK Native, Asian/Pacific Islander)	Female	2008	Moderately differentiated; Grade II	IIB	T3	N0	M0	Radiation, NOS method or source not specified	No/Unknown	87	Dead	73	Complete/Total/Standard Pneumonectomy; Pneumonectomy, Nos
White	Male	2009	Poorly differentiated; Grade III	IIB	T3	N0	M0	None/Unknown	No/Unknown	0	Dead	73	Complete/Total/Standard Pneumonectomy; Pneumonectomy, Nos
White	Female	2009	Poorly differentiated; Grade III	IIB	T3	N0	M0	None/Unknown	Yes	13	Dead	51	Complete/Total/Standard Pneumonectomy; Pneumonectomy, Nos
White	Female	2010	Poorly differentiated; Grade III	IIB	T3	N0	M0	Beam radiation	Yes	53	Dead	56	Complete/Total/Standard Pneumonectomy; Pneumonectomy, Nos
White	Female	2011	Moderately differentiated; Grade II	IIB	T3	N0	M0	None/Unknown	No/Unknown	1	Dead	71	Complete/Total/Standard Pneumonectomy; Pneumonectomy, Nos
White	Male	2011	Moderately differentiated; Grade II	IIB	T3	N0	M0	None/Unknown	No/Unknown	1	Dead	82	Complete/Total/Standard Pneumonectomy; Pneumonectomy, Nos
White	Female	2011	Moderately differentiated; Grade II	IIB	T3	N0	M0	None/Unknown	Yes	53	Alive	50	Complete/Total/Standard Pneumonectomy; Pneumonectomy, Nos
White	Female	2011	Poorly differentiated; Grade III	IIB	T3	N0	M0	None/Unknown	Yes	59	Alive	46	Complete/Total/Standard Pneumonectomy; Pneumonectomy, Nos
White	Male	2011	Poorly differentiated; Grade III	IIB	T3	N0	M0	None/Unknown	No/Unknown	58	Alive	54	Complete/Total/Standard Pneumonectomy; Pneumonectomy, Nos
White	Female	2012	Poorly differentiated; Grade III	IIB	T3	N0	M0	None/Unknown	No/Unknown	38	Alive	46	Complete/Total/Standard Pneumonectomy; Pneumonectomy, Nos
Other (American Indian/AK Native, Asian/Pacific Islander)	Female	2012	Moderately differentiated; Grade II	IIB	T3	N0	M0	None/Unknown	No/Unknown	11	Dead	87	Complete/Total/Standard Pneumonectomy; Pneumonectomy, Nos
White	Male	2012	Well differentiated; Grade I	IIB	T3	N0	M0	None/Unknown	No/Unknown	41	Alive	67	Complete/Total/Standard Pneumonectomy; Pneumonectomy, Nos
White	Male	2012	Moderately differentiated; Grade II	IIB	T3	N0	M0	None/Unknown	Yes	9	Dead	64	Complete/Total/Standard Pneumonectomy; Pneumonectomy, Nos
White	Male	2012	Poorly differentiated; Grade III	IIB	T3	N0	M0	None/Unknown	No/Unknown	2	Dead	71	Complete/Total/Standard Pneumonectomy; Pneumonectomy, Nos
Unknown	Female	2013	Unknown	IIB	T3	N0	M0	None/Unknown	Yes	6	Alive	79	Complete/Total/Standard Pneumonectomy; Pneumonectomy, Nos
White	Female	2013	Moderately differentiated; Grade II	IIB	T3	N0	M0	None/Unknown	Yes	28	Alive	76	Complete/Total/Standard Pneumonectomy; Pneumonectomy, Nos
White	Male	2013	Unknown	IIB	T3	N0	M0	None/Unknown	Yes	29	Alive	66	Complete/Total/Standard Pneumonectomy; Pneumonectomy, Nos
White	Female	2014	Moderately differentiated; Grade II	IIB	T3	N0	M0	None/Unknown	No/Unknown	14	Alive	58	Complete/Total/Standard Pneumonectomy; Pneumonectomy, Nos
Black	Female	2014	Poorly differentiated; Grade III	IIB	T3	N0	M0	None/Unknown	No/Unknown	10	Dead	63	Complete/Total/Standard Pneumonectomy; Pneumonectomy, Nos
White	Female	2014	Poorly differentiated; Grade III	IIB	T3	N0	M0	None/Unknown	No/Unknown	19	Dead	76	Complete/Total/Standard Pneumonectomy; Pneumonectomy, Nos
White	Female	2015	Poorly differentiated; Grade III	IIB	T3	N0	M0	None/Unknown	No/Unknown	11	Alive	71	Complete/Total/Standard Pneumonectomy; Pneumonectomy, Nos
White	Male	2015	Moderately differentiated; Grade II	IIB	T3	N0	M0	None/Unknown	No/Unknown	0	Alive	75	Complete/Total/Standard Pneumonectomy; Pneumonectomy, Nos
White	Female	2011	Moderately differentiated; Grade II	IV	T3	N0	M1b	None/Unknown	No/Unknown	57	Alive	77	Complete/Total/Standard Pneumonectomy; Pneumonectomy, Nos
White	Male	2011	Poorly differentiated; Grade III	IV	T3	N0	M1a	Beam radiation	Yes	13	Dead	63	Complete/Total/Standard Pneumonectomy; Pneumonectomy, Nos
White	Male	2012	Poorly differentiated; Grade III	IV	T3	N0	M1b	Beam radiation	No/Unknown	36	Alive	42	Complete/Total/Standard Pneumonectomy; Pneumonectomy, Nos
Other (American Indian/AK Native, Asian/Pacific Islander)	Female	2015	Moderately differentiated; Grade II	IV	T3	N0	M1a	Beam radiation	Yes	6	Alive	62	Complete/Total/Standard Pneumonectomy; Pneumonectomy, Nos
Other (American Indian/AK Native, Asian/Pacific Islander)	Male	2010	Unknown	IIIA	T4	N0	M0	None/Unknown	No/Unknown	66	Alive	66	Complete/Total/Standard Pneumonectomy; Pneumonectomy, Nos
White	Male	2011	Moderately differentiated; Grade II	IIIA	T4	N0	M0	None/Unknown	Yes	46	Alive	74	Complete/Total/Standard Pneumonectomy; Pneumonectomy, Nos
Black	Male	2011	Unknown	IIIA	T4	N0	M0	Beam radiation	Yes	21	Dead	34	Complete/Total/Standard Pneumonectomy; Pneumonectomy, Nos
White	Male	2012	Moderately differentiated; Grade II	IIIA	T4	N0	M0	None/Unknown	Yes	9	Dead	66	Complete/Total/Standard Pneumonectomy; Pneumonectomy, Nos
White	Male	2012	Moderately differentiated; Grade II	IIIA	T4	N0	M0	None/Unknown	No/Unknown	41	Alive	78	Complete/Total/Standard Pneumonectomy; Pneumonectomy, Nos
White	Male	2013	Moderately differentiated; Grade II	IIIA	T4	N0	M0	Beam radiation	Yes	5	Dead	71	Complete/Total/Standard Pneumonectomy; Pneumonectomy, Nos
White	Male	2014	Moderately differentiated; Grade II	IIIA	T4	N0	M0	None/Unknown	No/Unknown	18	Alive	65	Complete/Total/Standard Pneumonectomy; Pneumonectomy, Nos
Other (American Indian/AK Native, Asian/Pacific Islander)	Male	2015	Moderately differentiated; Grade II	IIIA	T4	N0	M0	None/Unknown	No/Unknown	8	Alive	71	Complete/Total/Standard Pneumonectomy; Pneumonectomy, Nos
Black	Male	2015	Unknown	IIIA	T4	N0	M0	Beam radiation	Yes	5	Alive	56	Complete/Total/Standard Pneumonectomy; Pneumonectomy, Nos
White	Female	2015	Moderately differentiated; Grade II	IIIA	T4	N0	M0	None/Unknown	Yes	4	Alive	65	Complete/Total/Standard Pneumonectomy; Pneumonectomy, Nos
White	Male	2004	Poorly differentiated; Grade III	IIIB	T4	N0	M0	None/Unknown	No/Unknown	16	Dead	66	Complete/Total/Standard Pneumonectomy; Pneumonectomy, Nos
White	Male	2005	Poorly differentiated; Grade III	IIIB	T4	N0	M0	Beam radiation	Yes	121	Alive	53	Complete/Total/Standard Pneumonectomy; Pneumonectomy, Nos
White	Female	2006	Poorly differentiated; Grade III	IIIB	T4	N0	M0	Beam radiation	Yes	9	Dead	65	Complete/Total/Standard Pneumonectomy; Pneumonectomy, Nos
Black	Female	2006	Poorly differentiated; Grade III	IIIB	T4	N0	M0	None/Unknown	No/Unknown	1	Dead	59	Complete/Total/Standard Pneumonectomy; Pneumonectomy, Nos
Black	Male	2007	Unknown	IIIB	T4	N0	M0	None/Unknown	Yes	11	Dead	64	Complete/Total/Standard Pneumonectomy; Pneumonectomy, Nos
White	Male	2008	Poorly differentiated; Grade III	IIIB	T4	N0	M0	None/Unknown	No/Unknown	6	Dead	55	Complete/Total/Standard Pneumonectomy; Pneumonectomy, Nos
White	Female	2008	Poorly differentiated; Grade III	IIIB	T4	N0	M0	Beam radiation	No/Unknown	1	Dead	69	Complete/Total/Standard Pneumonectomy; Pneumonectomy, Nos
White	Male	2008	Poorly differentiated; Grade III	IIIB	T4	N0	M0	Beam radiation	Yes	4	Dead	61	Complete/Total/Standard Pneumonectomy; Pneumonectomy, Nos
White	Male	2009	Moderately differentiated; Grade II	IIIB	T4	N0	M0	None/Unknown	No/Unknown	2	Dead	78	Complete/Total/Standard Pneumonectomy; Pneumonectomy, Nos
White	Male	2009	Moderately differentiated; Grade II	IIIB	T4	N0	M0	None/Unknown	No/Unknown	4	Dead	67	Complete/Total/Standard Pneumonectomy; Pneumonectomy, Nos
White	Female	2004	Poorly differentiated; Grade III	IV	T4	N0	M1	None/Unknown	No/Unknown	0	Dead	54	Complete/Total/Standard Pneumonectomy; Pneumonectomy, Nos
White	Male	2005	Moderately differentiated; Grade II	IV	T4	N0	M1	Beam radiation	Yes	25	Dead	52	Complete/Total/Standard Pneumonectomy; Pneumonectomy, Nos
White	Male	2006	Moderately differentiated; Grade II	IV	T4	N0	M1	None/Unknown	Yes	110	Dead	72	Complete/Total/Standard Pneumonectomy; Pneumonectomy, Nos
Black	Male	2010	Unknown	IV	T4	N0	M1a	None/Unknown	No/Unknown	33	Dead	79	Complete/Total/Standard Pneumonectomy; Pneumonectomy, Nos
White	Male	2012	Poorly differentiated; Grade III	IV	T4	N0	M1b	None/Unknown	No/Unknown	1	Dead	74	Complete/Total/Standard Pneumonectomy; Pneumonectomy, Nos
White	Female	2004	Moderately differentiated; Grade II	IIA	T1	N1	M0	Beam radiation	No/Unknown	32	Dead	70	Complete/Total/Standard Pneumonectomy; Pneumonectomy, Nos
White	Male	2004	Moderately differentiated; Grade II	IIA	T1	N1	M0	None/Unknown	Yes	25	Dead	72	Complete/Total/Standard Pneumonectomy; Pneumonectomy, Nos
White	Female	2004	Poorly differentiated; Grade III	IIA	T1	N1	M0	None/Unknown	Yes	41	Dead	72	Complete/Total/Standard Pneumonectomy; Pneumonectomy, Nos
White	Female	2004	Moderately differentiated; Grade II	IIA	T1	N1	M0	None/Unknown	Yes	27	Dead	57	Complete/Total/Standard Pneumonectomy; Pneumonectomy, Nos
White	Male	2004	Moderately differentiated; Grade II	IIA	T1	N1	M0	None/Unknown	No/Unknown	51	Dead	65	Complete/Total/Standard Pneumonectomy; Pneumonectomy, Nos
White	Female	2005	Poorly differentiated; Grade III	IIA	T1	N1	M0	None/Unknown	No/Unknown	29	Dead	83	Complete/Total/Standard Pneumonectomy; Pneumonectomy, Nos
White	Male	2005	Moderately differentiated; Grade II	IIA	T1	N1	M0	None/Unknown	Yes	126	Alive	54	Complete/Total/Standard Pneumonectomy; Pneumonectomy, Nos
White	Female	2005	Poorly differentiated; Grade III	IIA	T1	N1	M0	None/Unknown	No/Unknown	19	Dead	49	Complete/Total/Standard Pneumonectomy; Pneumonectomy, Nos
White	Female	2006	Poorly differentiated; Grade III	IIA	T1	N1	M0	None/Unknown	No/Unknown	17	Dead	76	Complete/Total/Standard Pneumonectomy; Pneumonectomy, Nos
White	Male	2006	Poorly differentiated; Grade III	IIA	T1	N1	M0	None/Unknown	Yes	74	Dead	32	Complete/Total/Standard Pneumonectomy; Pneumonectomy, Nos
White	Female	2006	Moderately differentiated; Grade II	IIA	T1	N1	M0	None/Unknown	Yes	109	Alive	70	Complete/Total/Standard Pneumonectomy; Pneumonectomy, Nos
White	Male	2006	Moderately differentiated; Grade II	IIA	T1	N1	M0	None/Unknown	No/Unknown	30	Dead	77	Complete/Total/Standard Pneumonectomy; Pneumonectomy, Nos
White	Male	2006	Poorly differentiated; Grade III	IIA	T1	N1	M0	None/Unknown	No/Unknown	2	Dead	50	Complete/Total/Standard Pneumonectomy; Pneumonectomy, Nos
White	Female	2007	Moderately differentiated; Grade II	IIA	T1	N1	M0	None/Unknown	Yes	39	Dead	49	Complete/Total/Standard Pneumonectomy; Pneumonectomy, Nos
White	Male	2007	Moderately differentiated; Grade II	IIA	T1	N1	M0	None/Unknown	Yes	4	Dead	61	Complete/Total/Standard Pneumonectomy; Pneumonectomy, Nos
White	Male	2008	Poorly differentiated; Grade III	IIA	T1	N1	M0	None/Unknown	No/Unknown	60	Dead	62	Complete/Total/Standard Pneumonectomy; Pneumonectomy, Nos
White	Female	2008	Poorly differentiated; Grade III	IIA	T1	N1	M0	None/Unknown	No/Unknown	44	Dead	72	Complete/Total/Standard Pneumonectomy; Pneumonectomy, Nos
White	Male	2008	Poorly differentiated; Grade III	IIA	T1	N1	M0	None/Unknown	No/Unknown	2	Dead	64	Complete/Total/Standard Pneumonectomy; Pneumonectomy, Nos
White	Female	2008	Moderately differentiated; Grade II	IIA	T1	N1	M0	None/Unknown	No/Unknown	25	Dead	65	Complete/Total/Standard Pneumonectomy; Pneumonectomy, Nos
White	Male	2006	Moderately differentiated; Grade II	IV	T1	N1	M1	None/Unknown	No/Unknown	2	Dead	66	Complete/Total/Standard Pneumonectomy; Pneumonectomy, Nos
White	Female	2006	Unknown	IV	T1	N1	M1	Beam radiation	No/Unknown	44	Dead	57	Complete/Total/Standard Pneumonectomy; Pneumonectomy, Nos
Black	Male	2012	Moderately differentiated; Grade II	IIA	T1a	N1	M0	None/Unknown	Yes	36	Alive	54	Complete/Total/Standard Pneumonectomy; Pneumonectomy, Nos
White	Female	2012	Moderately differentiated; Grade II	IIA	T1a	N1	M0	None/Unknown	Yes	40	Alive	60	Complete/Total/Standard Pneumonectomy; Pneumonectomy, Nos
White	Female	2013	Moderately differentiated; Grade II	IIA	T1a	N1	M0	None/Unknown	No/Unknown	18	Dead	70	Complete/Total/Standard Pneumonectomy; Pneumonectomy, Nos
Black	Female	2010	Poorly differentiated; Grade III	IIA	T1b	N1	M0	None/Unknown	No/Unknown	60	Alive	65	Complete/Total/Standard Pneumonectomy; Pneumonectomy, Nos
Black	Female	2010	Moderately differentiated; Grade II	IIA	T1b	N1	M0	None/Unknown	No/Unknown	3	Dead	67	Complete/Total/Standard Pneumonectomy; Pneumonectomy, Nos
White	Male	2011	Moderately differentiated; Grade II	IIA	T1b	N1	M0	None/Unknown	No/Unknown	0	Dead	85	Complete/Total/Standard Pneumonectomy; Pneumonectomy, Nos
White	Male	2012	Poorly differentiated; Grade III	IIA	T1b	N1	M0	None/Unknown	No/Unknown	7	Dead	46	Complete/Total/Standard Pneumonectomy; Pneumonectomy, Nos
Other (American Indian/AK Native, Asian/Pacific Islander)	Male	2004	Moderately differentiated; Grade II	IIB	T2	N1	M0	None/Unknown	Yes	34	Dead	58	Complete/Total/Standard Pneumonectomy; Pneumonectomy, Nos
White	Female	2004	Poorly differentiated; Grade III	IIB	T2	N1	M0	None/Unknown	Yes	38	Dead	49	Complete/Total/Standard Pneumonectomy; Pneumonectomy, Nos
White	Male	2004	Poorly differentiated; Grade III	IIB	T2	N1	M0	None/Unknown	Yes	20	Dead	74	Complete/Total/Standard Pneumonectomy; Pneumonectomy, Nos
White	Female	2004	Poorly differentiated; Grade III	IIB	T2	N1	M0	Beam radiation	No/Unknown	141	Alive	66	Complete/Total/Standard Pneumonectomy; Pneumonectomy, Nos
White	Male	2004	Poorly differentiated; Grade III	IIB	T2	N1	M0	None/Unknown	No/Unknown	6	Dead	75	Complete/Total/Standard Pneumonectomy; Pneumonectomy, Nos
White	Male	2004	Poorly differentiated; Grade III	IIB	T2	N1	M0	Beam radiation	Yes	11	Dead	65	Complete/Total/Standard Pneumonectomy; Pneumonectomy, Nos
White	Female	2004	Poorly differentiated; Grade III	IIB	T2	N1	M0	None/Unknown	No/Unknown	70	Dead	67	Complete/Total/Standard Pneumonectomy; Pneumonectomy, Nos
Black	Male	2004	Moderately differentiated; Grade II	IIB	T2	N1	M0	None/Unknown	No/Unknown	101	Dead	74	Complete/Total/Standard Pneumonectomy; Pneumonectomy, Nos
White	Female	2004	Poorly differentiated; Grade III	IIB	T2	N1	M0	None/Unknown	Yes	44	Dead	69	Complete/Total/Standard Pneumonectomy; Pneumonectomy, Nos
White	Female	2004	Poorly differentiated; Grade III	IIB	T2	N1	M0	None/Unknown	Yes	11	Dead	66	Complete/Total/Standard Pneumonectomy; Pneumonectomy, Nos
White	Male	2004	Moderately differentiated; Grade II	IIB	T2	N1	M0	None/Unknown	No/Unknown	67	Dead	60	Complete/Total/Standard Pneumonectomy; Pneumonectomy, Nos
White	Female	2005	Moderately differentiated; Grade II	IIB	T2	N1	M0	None/Unknown	No/Unknown	123	Alive	56	Complete/Total/Standard Pneumonectomy; Pneumonectomy, Nos
White	Male	2005	Moderately differentiated; Grade II	IIB	T2	N1	M0	None/Unknown	Yes	42	Dead	50	Complete/Total/Standard Pneumonectomy; Pneumonectomy, Nos
White	Male	2005	Poorly differentiated; Grade III	IIB	T2	N1	M0	None/Unknown	Yes	90	Dead	65	Complete/Total/Standard Pneumonectomy; Pneumonectomy, Nos
Black	Male	2005	Well differentiated; Grade I	IIB	T2	N1	M0	Beam radiation	No/Unknown	48	Dead	84	Complete/Total/Standard Pneumonectomy; Pneumonectomy, Nos
White	Female	2005	Poorly differentiated; Grade III	IIB	T2	N1	M0	None/Unknown	Yes	89	Dead	44	Complete/Total/Standard Pneumonectomy; Pneumonectomy, Nos
White	Female	2005	Moderately differentiated; Grade II	IIB	T2	N1	M0	Beam radiation	Yes	28	Dead	76	Complete/Total/Standard Pneumonectomy; Pneumonectomy, Nos
White	Male	2005	Poorly differentiated; Grade III	IIB	T2	N1	M0	None/Unknown	No/Unknown	10	Dead	71	Complete/Total/Standard Pneumonectomy; Pneumonectomy, Nos
White	Female	2005	Moderately differentiated; Grade II	IIB	T2	N1	M0	None/Unknown	No/Unknown	1	Dead	81	Complete/Total/Standard Pneumonectomy; Pneumonectomy, Nos
White	Female	2005	Poorly differentiated; Grade III	IIB	T2	N1	M0	None/Unknown	Yes	4	Dead	64	Complete/Total/Standard Pneumonectomy; Pneumonectomy, Nos
White	Male	2005	Unknown	IIB	T2	N1	M0	None/Unknown	Yes	126	Alive	61	Complete/Total/Standard Pneumonectomy; Pneumonectomy, Nos
Other (American Indian/AK Native, Asian/Pacific Islander)	Male	2005	Poorly differentiated; Grade III	IIB	T2	N1	M0	None/Unknown	Yes	31	Dead	49	Complete/Total/Standard Pneumonectomy; Pneumonectomy, Nos
White	Male	2006	Poorly differentiated; Grade III	IIB	T2	N1	M0	None/Unknown	No/Unknown	19	Dead	64	Complete/Total/Standard Pneumonectomy; Pneumonectomy, Nos
Other (American Indian/AK Native, Asian/Pacific Islander)	Male	2006	Poorly differentiated; Grade III	IIB	T2	N1	M0	None/Unknown	Yes	112	Alive	62	Complete/Total/Standard Pneumonectomy; Pneumonectomy, Nos
White	Female	2006	Moderately differentiated; Grade II	IIB	T2	N1	M0	Beam radiation	No/Unknown	9	Dead	60	Complete/Total/Standard Pneumonectomy; Pneumonectomy, Nos
White	Male	2006	Poorly differentiated; Grade III	IIB	T2	N1	M0	None/Unknown	No/Unknown	2	Dead	87	Complete/Total/Standard Pneumonectomy; Pneumonectomy, Nos
White	Female	2006	Poorly differentiated; Grade III	IIB	T2	N1	M0	Beam radiation	Yes	75	Dead	59	Complete/Total/Standard Pneumonectomy; Pneumonectomy, Nos
Black	Male	2006	Poorly differentiated; Grade III	IIB	T2	N1	M0	None/Unknown	Yes	6	Alive	50	Complete/Total/Standard Pneumonectomy; Pneumonectomy, Nos
White	Male	2006	Poorly differentiated; Grade III	IIB	T2	N1	M0	Beam radiation	No/Unknown	62	Dead	42	Complete/Total/Standard Pneumonectomy; Pneumonectomy, Nos
Black	Male	2006	Poorly differentiated; Grade III	IIB	T2	N1	M0	None/Unknown	No/Unknown	34	Dead	50	Complete/Total/Standard Pneumonectomy; Pneumonectomy, Nos
Black	Male	2006	Poorly differentiated; Grade III	IIB	T2	N1	M0	None/Unknown	Yes	113	Alive	71	Complete/Total/Standard Pneumonectomy; Pneumonectomy, Nos
White	Male	2006	Moderately differentiated; Grade II	IIB	T2	N1	M0	None/Unknown	Yes	47	Dead	60	Complete/Total/Standard Pneumonectomy; Pneumonectomy, Nos
White	Male	2007	Poorly differentiated; Grade III	IIB	T2	N1	M0	None/Unknown	Yes	19	Dead	48	Complete/Total/Standard Pneumonectomy; Pneumonectomy, Nos
Other (American Indian/AK Native, Asian/Pacific Islander)	Female	2007	Poorly differentiated; Grade III	IIB	T2	N1	M0	None/Unknown	No/Unknown	9	Dead	74	Complete/Total/Standard Pneumonectomy; Pneumonectomy, Nos
Other (American Indian/AK Native, Asian/Pacific Islander)	Male	2007	Poorly differentiated; Grade III	IIB	T2	N1	M0	None/Unknown	No/Unknown	102	Alive	67	Complete/Total/Standard Pneumonectomy; Pneumonectomy, Nos
White	Male	2007	Poorly differentiated; Grade III	IIB	T2	N1	M0	None/Unknown	Yes	20	Dead	63	Complete/Total/Standard Pneumonectomy; Pneumonectomy, Nos
White	Female	2008	Well differentiated; Grade I	IIB	T2	N1	M0	None/Unknown	Yes	19	Dead	65	Complete/Total/Standard Pneumonectomy; Pneumonectomy, Nos
White	Male	2008	Poorly differentiated; Grade III	IIB	T2	N1	M0	None/Unknown	Yes	86	Alive	43	Complete/Total/Standard Pneumonectomy; Pneumonectomy, Nos
White	Male	2008	Poorly differentiated; Grade III	IIB	T2	N1	M0	None/Unknown	Yes	94	Alive	65	Complete/Total/Standard Pneumonectomy; Pneumonectomy, Nos
White	Female	2008	Poorly differentiated; Grade III	IIB	T2	N1	M0	None/Unknown	No/Unknown	16	Dead	51	Complete/Total/Standard Pneumonectomy; Pneumonectomy, Nos
White	Male	2008	Unknown	IIB	T2	N1	M0	None/Unknown	Yes	78	Dead	66	Complete/Total/Standard Pneumonectomy; Pneumonectomy, Nos
White	Female	2008	Moderately differentiated; Grade II	IIB	T2	N1	M0	None/Unknown	No/Unknown	29	Dead	48	Complete/Total/Standard Pneumonectomy; Pneumonectomy, Nos
Black	Female	2008	Poorly differentiated; Grade III	IIB	T2	N1	M0	None/Unknown	Yes	30	Dead	56	Complete/Total/Standard Pneumonectomy; Pneumonectomy, Nos
White	Female	2008	Poorly differentiated; Grade III	IIB	T2	N1	M0	Beam radiation	Yes	65	Dead	46	Complete/Total/Standard Pneumonectomy; Pneumonectomy, Nos
Other (American Indian/AK Native, Asian/Pacific Islander)	Male	2009	Poorly differentiated; Grade III	IIB	T2	N1	M0	None/Unknown	Yes	4	Dead	60	Complete/Total/Standard Pneumonectomy; Pneumonectomy, Nos
White	Female	2009	Moderately differentiated; Grade II	IIB	T2	N1	M0	Beam radiation	No/Unknown	33	Dead	77	Complete/Total/Standard Pneumonectomy; Pneumonectomy, Nos
White	Female	2009	Moderately differentiated; Grade II	IIB	T2	N1	M0	None/Unknown	No/Unknown	28	Dead	78	Complete/Total/Standard Pneumonectomy; Pneumonectomy, Nos
White	Male	2009	Poorly differentiated; Grade III	IIB	T2	N1	M0	None/Unknown	No/Unknown	0	Dead	75	Complete/Total/Standard Pneumonectomy; Pneumonectomy, Nos
White	Male	2004	Moderately differentiated; Grade II	IV	T2	N1	M1	None/Unknown	Yes	31	Dead	68	Complete/Total/Standard Pneumonectomy; Pneumonectomy, Nos
White	Female	2005	Moderately differentiated; Grade II	IV	T2	N1	M1	Beam radiation	Yes	125	Alive	54	Complete/Total/Standard Pneumonectomy; Pneumonectomy, Nos
White	Female	2006	Poorly differentiated; Grade III	IV	T2	N1	M1	None/Unknown	Yes	17	Dead	76	Complete/Total/Standard Pneumonectomy; Pneumonectomy, Nos
Black	Male	2006	Poorly differentiated; Grade III	IV	T2	N1	M1	Beam radiation	No/Unknown	3	Dead	65	Complete/Total/Standard Pneumonectomy; Pneumonectomy, Nos
Black	Male	2007	Moderately differentiated; Grade II	IV	T2	N1	M1	None/Unknown	Yes	22	Dead	58	Complete/Total/Standard Pneumonectomy; Pneumonectomy, Nos
Black	Male	2009	Poorly differentiated; Grade III	IV	T2	N1	M1	None/Unknown	Yes	21	Dead	78	Complete/Total/Standard Pneumonectomy; Pneumonectomy, Nos
Black	Female	2010	Moderately differentiated; Grade II	IIA	T2a	N1	M0	None/Unknown	Yes	44	Dead	64	Complete/Total/Standard Pneumonectomy; Pneumonectomy, Nos
White	Female	2010	Poorly differentiated; Grade III	IIA	T2a	N1	M0	None/Unknown	No/Unknown	31	Dead	80	Complete/Total/Standard Pneumonectomy; Pneumonectomy, Nos
White	Male	2011	Moderately differentiated; Grade II	IIA	T2a	N1	M0	None/Unknown	Yes	37	Dead	57	Complete/Total/Standard Pneumonectomy; Pneumonectomy, Nos
White	Male	2011	Unknown	IIA	T2a	N1	M0	None/Unknown	Yes	13	Dead	63	Complete/Total/Standard Pneumonectomy; Pneumonectomy, Nos
White	Female	2011	Poorly differentiated; Grade III	IIA	T2a	N1	M0	None/Unknown	No/Unknown	33	Dead	75	Complete/Total/Standard Pneumonectomy; Pneumonectomy, Nos
White	Female	2012	Poorly differentiated; Grade III	IIA	T2a	N1	M0	None/Unknown	No/Unknown	39	Alive	40	Complete/Total/Standard Pneumonectomy; Pneumonectomy, Nos
White	Male	2012	Moderately differentiated; Grade II	IIA	T2a	N1	M0	None/Unknown	No/Unknown	46	Alive	56	Complete/Total/Standard Pneumonectomy; Pneumonectomy, Nos
White	Male	2012	Poorly differentiated; Grade III	IIA	T2a	N1	M0	None/Unknown	Yes	41	Alive	48	Complete/Total/Standard Pneumonectomy; Pneumonectomy, Nos
White	Female	2012	Poorly differentiated; Grade III	IIA	T2a	N1	M0	None/Unknown	No/Unknown	27	Dead	75	Complete/Total/Standard Pneumonectomy; Pneumonectomy, Nos
White	Male	2012	Well differentiated; Grade I	IIA	T2a	N1	M0	None/Unknown	No/Unknown	2	Dead	76	Complete/Total/Standard Pneumonectomy; Pneumonectomy, Nos
White	Female	2013	Poorly differentiated; Grade III	IIA	T2a	N1	M0	None/Unknown	Yes	22	Alive	62	Complete/Total/Standard Pneumonectomy; Pneumonectomy, Nos
White	Female	2013	Unknown	IIA	T2a	N1	M0	Beam radiation	Yes	33	Alive	71	Complete/Total/Standard Pneumonectomy; Pneumonectomy, Nos
White	Male	2013	Poorly differentiated; Grade III	IIA	T2a	N1	M0	None/Unknown	Yes	30	Alive	61	Complete/Total/Standard Pneumonectomy; Pneumonectomy, Nos
White	Male	2013	Poorly differentiated; Grade III	IIA	T2a	N1	M0	None/Unknown	Yes	25	Alive	59	Complete/Total/Standard Pneumonectomy; Pneumonectomy, Nos
White	Male	2013	Moderately differentiated; Grade II	IIA	T2a	N1	M0	None/Unknown	Yes	31	Alive	63	Complete/Total/Standard Pneumonectomy; Pneumonectomy, Nos
Black	Male	2014	Poorly differentiated; Grade III	IIA	T2a	N1	M0	None/Unknown	Yes	18	Alive	73	Complete/Total/Standard Pneumonectomy; Pneumonectomy, Nos
White	Female	2015	Poorly differentiated; Grade III	IIA	T2a	N1	M0	None/Unknown	Yes	10	Alive	64	Complete/Total/Standard Pneumonectomy; Pneumonectomy, Nos
Other (American Indian/AK Native, Asian/Pacific Islander)	Female	2015	Poorly differentiated; Grade III	IIA	T2a	N1	M0	None/Unknown	Yes	1	Alive	79	Complete/Total/Standard Pneumonectomy; Pneumonectomy, Nos
White	Female	2010	Poorly differentiated; Grade III	IIB	T2b	N1	M0	Beam radiation	Yes	44	Dead	63	Complete/Total/Standard Pneumonectomy; Pneumonectomy, Nos
White	Male	2010	Poorly differentiated; Grade III	IIB	T2b	N1	M0	None/Unknown	Yes	27	Dead	73	Complete/Total/Standard Pneumonectomy; Pneumonectomy, Nos
White	Female	2010	Poorly differentiated; Grade III	IIB	T2b	N1	M0	None/Unknown	Yes	62	Alive	47	Complete/Total/Standard Pneumonectomy; Pneumonectomy, Nos
White	Female	2011	Poorly differentiated; Grade III	IIB	T2b	N1	M0	None/Unknown	Yes	42	Dead	62	Complete/Total/Standard Pneumonectomy; Pneumonectomy, Nos
White	Male	2012	Poorly differentiated; Grade III	IIB	T2b	N1	M0	None/Unknown	Yes	20	Dead	58	Complete/Total/Standard Pneumonectomy; Pneumonectomy, Nos
Other (American Indian/AK Native, Asian/Pacific Islander)	Female	2013	Poorly differentiated; Grade III	IIB	T2b	N1	M0	None/Unknown	Yes	26	Alive	64	Complete/Total/Standard Pneumonectomy; Pneumonectomy, Nos
White	Female	2013	Moderately differentiated; Grade II	IIB	T2b	N1	M0	None/Unknown	Yes	29	Alive	69	Complete/Total/Standard Pneumonectomy; Pneumonectomy, Nos
Other (American Indian/AK Native, Asian/Pacific Islander)	Female	2013	Poorly differentiated; Grade III	IIB	T2b	N1	M0	None/Unknown	Yes	8	Dead	81	Complete/Total/Standard Pneumonectomy; Pneumonectomy, Nos
White	Female	2015	Moderately differentiated; Grade II	IIB	T2b	N1	M0	None/Unknown	Yes	1	Alive	80	Complete/Total/Standard Pneumonectomy; Pneumonectomy, Nos
White	Female	2005	Poorly differentiated; Grade III	IIIA	T3	N1	M0	None/Unknown	No/Unknown	10	Dead	72	Complete/Total/Standard Pneumonectomy; Pneumonectomy, Nos
White	Male	2005	Moderately differentiated; Grade II	IIIA	T3	N1	M0	Beam radiation	Yes	17	Dead	58	Complete/Total/Standard Pneumonectomy; Pneumonectomy, Nos
White	Male	2005	Poorly differentiated; Grade III	IIIA	T3	N1	M0	Beam radiation	Yes	4	Dead	79	Complete/Total/Standard Pneumonectomy; Pneumonectomy, Nos
White	Male	2005	Poorly differentiated; Grade III	IIIA	T3	N1	M0	None/Unknown	No/Unknown	7	Dead	56	Complete/Total/Standard Pneumonectomy; Pneumonectomy, Nos
Black	Male	2007	Poorly differentiated; Grade III	IIIA	T3	N1	M0	Beam radiation	Yes	14	Dead	54	Complete/Total/Standard Pneumonectomy; Pneumonectomy, Nos
White	Male	2008	Poorly differentiated; Grade III	IIIA	T3	N1	M0	Beam radiation	Yes	7	Dead	55	Complete/Total/Standard Pneumonectomy; Pneumonectomy, Nos
White	Female	2009	Moderately differentiated; Grade II	IIIA	T3	N1	M0	None/Unknown	Yes	37	Dead	83	Complete/Total/Standard Pneumonectomy; Pneumonectomy, Nos
White	Female	2009	Unknown	IIIA	T3	N1	M0	None/Unknown	Yes	68	Dead	70	Complete/Total/Standard Pneumonectomy; Pneumonectomy, Nos
White	Male	2010	Moderately differentiated; Grade II	IIIA	T3	N1	M0	None/Unknown	No/Unknown	2	Dead	60	Complete/Total/Standard Pneumonectomy; Pneumonectomy, Nos
Black	Male	2010	Poorly differentiated; Grade III	IIIA	T3	N1	M0	None/Unknown	Yes	9	Dead	70	Complete/Total/Standard Pneumonectomy; Pneumonectomy, Nos
White	Male	2010	Poorly differentiated; Grade III	IIIA	T3	N1	M0	Beam radiation	No/Unknown	61	Alive	58	Complete/Total/Standard Pneumonectomy; Pneumonectomy, Nos
White	Male	2010	Poorly differentiated; Grade III	IIIA	T3	N1	M0	None/Unknown	No/Unknown	68	Alive	80	Complete/Total/Standard Pneumonectomy; Pneumonectomy, Nos
White	Female	2011	Poorly differentiated; Grade III	IIIA	T3	N1	M0	None/Unknown	No/Unknown	3	Dead	71	Complete/Total/Standard Pneumonectomy; Pneumonectomy, Nos
Black	Female	2011	Poorly differentiated; Grade III	IIIA	T3	N1	M0	None/Unknown	Yes	21	Dead	65	Complete/Total/Standard Pneumonectomy; Pneumonectomy, Nos
White	Female	2011	Unknown	IIIA	T3	N1	M0	Beam radiation	Yes	54	Alive	51	Complete/Total/Standard Pneumonectomy; Pneumonectomy, Nos
White	Female	2012	Poorly differentiated; Grade III	IIIA	T3	N1	M0	None/Unknown	No/Unknown	2	Dead	78	Complete/Total/Standard Pneumonectomy; Pneumonectomy, Nos
White	Male	2012	Moderately differentiated; Grade II	IIIA	T3	N1	M0	None/Unknown	No/Unknown	2	Dead	60	Complete/Total/Standard Pneumonectomy; Pneumonectomy, Nos
White	Male	2013	Poorly differentiated; Grade III	IIIA	T3	N1	M0	None/Unknown	Yes	14	Dead	52	Complete/Total/Standard Pneumonectomy; Pneumonectomy, Nos
White	Female	2013	Poorly differentiated; Grade III	IIIA	T3	N1	M0	None/Unknown	No/Unknown	0	Dead	67	Complete/Total/Standard Pneumonectomy; Pneumonectomy, Nos
White	Female	2014	Poorly differentiated; Grade III	IIIA	T3	N1	M0	None/Unknown	No/Unknown	16	Dead	75	Complete/Total/Standard Pneumonectomy; Pneumonectomy, Nos
White	Female	2014	Poorly differentiated; Grade III	IIIA	T3	N1	M0	None/Unknown	No/Unknown	2	Dead	60	Complete/Total/Standard Pneumonectomy; Pneumonectomy, Nos
White	Female	2014	Poorly differentiated; Grade III	IIIA	T3	N1	M0	None/Unknown	Yes	18	Alive	50	Complete/Total/Standard Pneumonectomy; Pneumonectomy, Nos
White	Male	2014	Poorly differentiated; Grade III	IIIA	T3	N1	M0	None/Unknown	No/Unknown	13	Dead	74	Complete/Total/Standard Pneumonectomy; Pneumonectomy, Nos
White	Male	2015	Poorly differentiated; Grade III	IIIA	T3	N1	M0	None/Unknown	Yes	2	Alive	57	Complete/Total/Standard Pneumonectomy; Pneumonectomy, Nos
White	Female	2015	Moderately differentiated; Grade II	IIIA	T3	N1	M0	Beam radiation	Yes	11	Alive	72	Complete/Total/Standard Pneumonectomy; Pneumonectomy, Nos
White	Female	2015	Poorly differentiated; Grade III	IIIA	T3	N1	M0	None/Unknown	No/Unknown	10	Alive	69	Complete/Total/Standard Pneumonectomy; Pneumonectomy, Nos
White	Female	2009	Poorly differentiated; Grade III	IV	T3	N1	M1	Beam radiation	No/Unknown	21	Dead	68	Complete/Total/Standard Pneumonectomy; Pneumonectomy, Nos
White	Female	2010	Moderately differentiated; Grade II	IV	T3	N1	M1b	Beam radiation	Yes	25	Dead	56	Complete/Total/Standard Pneumonectomy; Pneumonectomy, Nos
White	Female	2011	Poorly differentiated; Grade III	IV	T3	N1	M1b	Beam radiation	No/Unknown	2	Dead	56	Complete/Total/Standard Pneumonectomy; Pneumonectomy, Nos
White	Female	2015	Moderately differentiated; Grade II	IV	T3	N1	M1a	None/Unknown	No/Unknown	8	Alive	66	Complete/Total/Standard Pneumonectomy; Pneumonectomy, Nos
White	Female	2010	Undifferentiated; anaplastic; Grade IV	IIIA	T4	N1	M0	None/Unknown	Yes	62	Alive	52	Complete/Total/Standard Pneumonectomy; Pneumonectomy, Nos
Other (American Indian/AK Native, Asian/Pacific Islander)	Male	2010	Moderately differentiated; Grade II	IIIA	T4	N1	M0	Beam radiation	No/Unknown	58	Dead	70	Complete/Total/Standard Pneumonectomy; Pneumonectomy, Nos
White	Male	2010	Poorly differentiated; Grade III	IIIA	T4	N1	M0	None/Unknown	Yes	64	Alive	79	Complete/Total/Standard Pneumonectomy; Pneumonectomy, Nos
White	Female	2011	Moderately differentiated; Grade II	IIIA	T4	N1	M0	None/Unknown	No/Unknown	6	Dead	83	Complete/Total/Standard Pneumonectomy; Pneumonectomy, Nos
Black	Female	2011	Poorly differentiated; Grade III	IIIA	T4	N1	M0	None/Unknown	Yes	15	Dead	72	Complete/Total/Standard Pneumonectomy; Pneumonectomy, Nos
White	Male	2011	Moderately differentiated; Grade II	IIIA	T4	N1	M0	None/Unknown	No/Unknown	23	Dead	67	Complete/Total/Standard Pneumonectomy; Pneumonectomy, Nos
White	Female	2011	Poorly differentiated; Grade III	IIIA	T4	N1	M0	None/Unknown	No/Unknown	20	Dead	68	Complete/Total/Standard Pneumonectomy; Pneumonectomy, Nos
White	Male	2012	Poorly differentiated; Grade III	IIIA	T4	N1	M0	None/Unknown	Yes	16	Dead	68	Complete/Total/Standard Pneumonectomy; Pneumonectomy, Nos
White	Female	2012	Poorly differentiated; Grade III	IIIA	T4	N1	M0	None/Unknown	No/Unknown	41	Alive	62	Complete/Total/Standard Pneumonectomy; Pneumonectomy, Nos
White	Female	2012	Poorly differentiated; Grade III	IIIA	T4	N1	M0	None/Unknown	No/Unknown	4	Dead	73	Complete/Total/Standard Pneumonectomy; Pneumonectomy, Nos
White	Male	2012	Moderately differentiated; Grade II	IIIA	T4	N1	M0	None/Unknown	No/Unknown	44	Alive	76	Complete/Total/Standard Pneumonectomy; Pneumonectomy, Nos
Other (American Indian/AK Native, Asian/Pacific Islander)	Male	2015	Poorly differentiated; Grade III	IIIA	T4	N1	M0	None/Unknown	Yes	5	Alive	65	Complete/Total/Standard Pneumonectomy; Pneumonectomy, Nos
White	Male	2015	Poorly differentiated; Grade III	IIIA	T4	N1	M0	None/Unknown	Yes	8	Alive	53	Complete/Total/Standard Pneumonectomy; Pneumonectomy, Nos
White	Female	2004	Moderately differentiated; Grade II	IIIB	T4	N1	M0	None/Unknown	Yes	135	Alive	51	Complete/Total/Standard Pneumonectomy; Pneumonectomy, Nos
White	Male	2004	Poorly differentiated; Grade III	IIIB	T4	N1	M0	Beam radiation	Yes	132	Alive	53	Complete/Total/Standard Pneumonectomy; Pneumonectomy, Nos
White	Female	2004	Poorly differentiated; Grade III	IIIB	T4	N1	M0	None/Unknown	No/Unknown	26	Dead	75	Complete/Total/Standard Pneumonectomy; Pneumonectomy, Nos
White	Male	2004	Moderately differentiated; Grade II	IIIB	T4	N1	M0	None/Unknown	No/Unknown	12	Dead	73	Complete/Total/Standard Pneumonectomy; Pneumonectomy, Nos
White	Male	2004	Poorly differentiated; Grade III	IIIB	T4	N1	M0	None/Unknown	No/Unknown	14	Dead	81	Complete/Total/Standard Pneumonectomy; Pneumonectomy, Nos
White	Female	2005	Poorly differentiated; Grade III	IIIB	T4	N1	M0	None/Unknown	Yes	24	Dead	71	Complete/Total/Standard Pneumonectomy; Pneumonectomy, Nos
White	Female	2006	Poorly differentiated; Grade III	IIIB	T4	N1	M0	Beam radiation	Yes	4	Dead	42	Complete/Total/Standard Pneumonectomy; Pneumonectomy, Nos
White	Female	2007	Unknown	IIIB	T4	N1	M0	None/Unknown	No/Unknown	9	Dead	75	Complete/Total/Standard Pneumonectomy; Pneumonectomy, Nos
White	Male	2007	Poorly differentiated; Grade III	IIIB	T4	N1	M0	None/Unknown	Yes	20	Dead	68	Complete/Total/Standard Pneumonectomy; Pneumonectomy, Nos
White	Male	2007	Poorly differentiated; Grade III	IIIB	T4	N1	M0	Beam radiation	Yes	35	Dead	56	Complete/Total/Standard Pneumonectomy; Pneumonectomy, Nos
White	Female	2007	Moderately differentiated; Grade II	IIIB	T4	N1	M0	None/Unknown	Yes	106	Alive	48	Complete/Total/Standard Pneumonectomy; Pneumonectomy, Nos
White	Male	2007	Moderately differentiated; Grade II	IIIB	T4	N1	M0	None/Unknown	No/Unknown	9	Dead	67	Complete/Total/Standard Pneumonectomy; Pneumonectomy, Nos
White	Female	2007	Poorly differentiated; Grade III	IIIB	T4	N1	M0	None/Unknown	Yes	12	Dead	65	Complete/Total/Standard Pneumonectomy; Pneumonectomy, Nos
Other (American Indian/AK Native, Asian/Pacific Islander)	Male	2008	Poorly differentiated; Grade III	IIIB	T4	N1	M0	None/Unknown	Yes	10	Dead	54	Complete/Total/Standard Pneumonectomy; Pneumonectomy, Nos
White	Female	2008	Well differentiated; Grade I	IIIB	T4	N1	M0	None/Unknown	No/Unknown	1	Dead	75	Complete/Total/Standard Pneumonectomy; Pneumonectomy, Nos
White	Male	2008	Poorly differentiated; Grade III	IIIB	T4	N1	M0	None/Unknown	No/Unknown	6	Dead	62	Complete/Total/Standard Pneumonectomy; Pneumonectomy, Nos
White	Female	2009	Moderately differentiated; Grade II	IIIB	T4	N1	M0	None/Unknown	Yes	26	Dead	57	Complete/Total/Standard Pneumonectomy; Pneumonectomy, Nos
Other (American Indian/AK Native, Asian/Pacific Islander)	Male	2009	Moderately differentiated; Grade II	IIIB	T4	N1	M0	None/Unknown	No/Unknown	0	Dead	72	Complete/Total/Standard Pneumonectomy; Pneumonectomy, Nos
White	Female	2009	Poorly differentiated; Grade III	IIIB	T4	N1	M0	None/Unknown	Yes	69	Alive	71	Complete/Total/Standard Pneumonectomy; Pneumonectomy, Nos
White	Female	2004	Poorly differentiated; Grade III	IV	T4	N1	M1	None/Unknown	No/Unknown	3	Dead	70	Complete/Total/Standard Pneumonectomy; Pneumonectomy, Nos
White	Male	2004	Moderately differentiated; Grade II	IV	T4	N1	M1	None/Unknown	Yes	29	Dead	46	Complete/Total/Standard Pneumonectomy; Pneumonectomy, Nos
White	Male	2005	Well differentiated; Grade I	IV	T4	N1	M1	None/Unknown	Yes	6	Dead	79	Complete/Total/Standard Pneumonectomy; Pneumonectomy, Nos
White	Male	2005	Poorly differentiated; Grade III	IV	T4	N1	M1	Beam radiation	Yes	49	Dead	54	Complete/Total/Standard Pneumonectomy; Pneumonectomy, Nos
Black	Female	2006	Poorly differentiated; Grade III	IV	T4	N1	M1	Beam radiation	No/Unknown	2	Dead	74	Complete/Total/Standard Pneumonectomy; Pneumonectomy, Nos
White	Male	2006	Poorly differentiated; Grade III	IV	T4	N1	M1	None/Unknown	Yes	4	Dead	77	Complete/Total/Standard Pneumonectomy; Pneumonectomy, Nos
White	Female	2007	Unknown	IV	T4	N1	M1	Beam radiation	No/Unknown	4	Dead	64	Complete/Total/Standard Pneumonectomy; Pneumonectomy, Nos
White	Male	2011	Unknown	IV	T4	N1	M1a	None/Unknown	No/Unknown	17	Dead	50	Complete/Total/Standard Pneumonectomy; Pneumonectomy, Nos
Other (American Indian/AK Native, Asian/Pacific Islander)	Male	2004	Moderately differentiated; Grade II	IIIA	T1	N2	M0	None/Unknown	Yes	143	Alive	55	Complete/Total/Standard Pneumonectomy; Pneumonectomy, Nos
White	Male	2004	Poorly differentiated; Grade III	IIIA	T1	N2	M0	Beam radiation	No/Unknown	70	Dead	55	Complete/Total/Standard Pneumonectomy; Pneumonectomy, Nos
Black	Female	2008	Moderately differentiated; Grade II	IIIA	T1	N2	M0	None/Unknown	No/Unknown	87	Alive	41	Complete/Total/Standard Pneumonectomy; Pneumonectomy, Nos
White	Male	2008	Moderately differentiated; Grade II	IIIA	T1	N2	M0	Beam radiation	No/Unknown	4	Dead	65	Complete/Total/Standard Pneumonectomy; Pneumonectomy, Nos
Black	Female	2009	Unknown	IIIA	T1	N2	M0	None/Unknown	No/Unknown	74	Alive	69	Complete/Total/Standard Pneumonectomy; Pneumonectomy, Nos
White	Female	2010	Moderately differentiated; Grade II	IIIA	T1b	N2	M0	None/Unknown	Yes	69	Alive	64	Complete/Total/Standard Pneumonectomy; Pneumonectomy, Nos
White	Female	2011	Poorly differentiated; Grade III	IIIA	T1b	N2	M0	Beam radiation	Yes	44	Dead	56	Complete/Total/Standard Pneumonectomy; Pneumonectomy, Nos
White	Female	2004	Moderately differentiated; Grade II	IIIA	T2	N2	M0	None/Unknown	No/Unknown	53	Dead	69	Complete/Total/Standard Pneumonectomy; Pneumonectomy, Nos
White	Female	2004	Moderately differentiated; Grade II	IIIA	T2	N2	M0	Beam radiation	Yes	10	Dead	47	Complete/Total/Standard Pneumonectomy; Pneumonectomy, Nos
White	Male	2004	Unknown	IIIA	T2	N2	M0	None/Unknown	No/Unknown	7	Dead	66	Complete/Total/Standard Pneumonectomy; Pneumonectomy, Nos
Other (American Indian/AK Native, Asian/Pacific Islander)	Female	2004	Moderately differentiated; Grade II	IIIA	T2	N2	M0	None/Unknown	No/Unknown	38	Dead	66	Complete/Total/Standard Pneumonectomy; Pneumonectomy, Nos
White	Female	2004	Poorly differentiated; Grade III	IIIA	T2	N2	M0	None/Unknown	No/Unknown	1	Dead	68	Complete/Total/Standard Pneumonectomy; Pneumonectomy, Nos
White	Female	2004	Moderately differentiated; Grade II	IIIA	T2	N2	M0	None/Unknown	Yes	81	Dead	47	Complete/Total/Standard Pneumonectomy; Pneumonectomy, Nos
White	Male	2005	Poorly differentiated; Grade III	IIIA	T2	N2	M0	None/Unknown	No/Unknown	11	Dead	56	Complete/Total/Standard Pneumonectomy; Pneumonectomy, Nos
White	Male	2005	Moderately differentiated; Grade II	IIIA	T2	N2	M0	None/Unknown	No/Unknown	0	Dead	73	Complete/Total/Standard Pneumonectomy; Pneumonectomy, Nos
White	Male	2005	Poorly differentiated; Grade III	IIIA	T2	N2	M0	None/Unknown	No/Unknown	2	Dead	61	Complete/Total/Standard Pneumonectomy; Pneumonectomy, Nos
White	Male	2005	Poorly differentiated; Grade III	IIIA	T2	N2	M0	None/Unknown	Yes	29	Dead	49	Complete/Total/Standard Pneumonectomy; Pneumonectomy, Nos
White	Male	2006	Poorly differentiated; Grade III	IIIA	T2	N2	M0	Beam radiation	Yes	34	Dead	56	Complete/Total/Standard Pneumonectomy; Pneumonectomy, Nos
White	Male	2006	Poorly differentiated; Grade III	IIIA	T2	N2	M0	Beam radiation	Yes	119	Alive	57	Complete/Total/Standard Pneumonectomy; Pneumonectomy, Nos
White	Male	2006	Poorly differentiated; Grade III	IIIA	T2	N2	M0	Beam radiation	Yes	73	Dead	58	Complete/Total/Standard Pneumonectomy; Pneumonectomy, Nos
White	Male	2006	Poorly differentiated; Grade III	IIIA	T2	N2	M0	None/Unknown	No/Unknown	12	Dead	53	Complete/Total/Standard Pneumonectomy; Pneumonectomy, Nos
White	Male	2006	Poorly differentiated; Grade III	IIIA	T2	N2	M0	None/Unknown	No/Unknown	0	Dead	71	Complete/Total/Standard Pneumonectomy; Pneumonectomy, Nos
Black	Female	2006	Moderately differentiated; Grade II	IIIA	T2	N2	M0	None/Unknown	Yes	90	Dead	74	Complete/Total/Standard Pneumonectomy; Pneumonectomy, Nos
White	Female	2006	Poorly differentiated; Grade III	IIIA	T2	N2	M0	None/Unknown	Yes	76	Dead	68	Complete/Total/Standard Pneumonectomy; Pneumonectomy, Nos
White	Female	2007	Unknown	IIIA	T2	N2	M0	Beam radiation	Yes	24	Dead	52	Complete/Total/Standard Pneumonectomy; Pneumonectomy, Nos
White	Male	2007	Poorly differentiated; Grade III	IIIA	T2	N2	M0	Beam radiation	Yes	75	Dead	48	Complete/Total/Standard Pneumonectomy; Pneumonectomy, Nos
White	Female	2007	Moderately differentiated; Grade II	IIIA	T2	N2	M0	None/Unknown	Yes	80	Alive	57	Complete/Total/Standard Pneumonectomy; Pneumonectomy, Nos
White	Male	2007	Moderately differentiated; Grade II	IIIA	T2	N2	M0	None/Unknown	Yes	91	Dead	80	Complete/Total/Standard Pneumonectomy; Pneumonectomy, Nos
White	Male	2007	Poorly differentiated; Grade III	IIIA	T2	N2	M0	Beam radiation	No/Unknown	68	Dead	68	Complete/Total/Standard Pneumonectomy; Pneumonectomy, Nos
White	Female	2007	Moderately differentiated; Grade II	IIIA	T2	N2	M0	None/Unknown	No/Unknown	22	Dead	67	Complete/Total/Standard Pneumonectomy; Pneumonectomy, Nos
White	Male	2007	Unknown	IIIA	T2	N2	M0	None/Unknown	Yes	19	Dead	47	Complete/Total/Standard Pneumonectomy; Pneumonectomy, Nos
White	Male	2007	Undifferentiated; anaplastic; Grade IV	IIIA	T2	N2	M0	Beam radiation	Yes	14	Dead	59	Complete/Total/Standard Pneumonectomy; Pneumonectomy, Nos
White	Female	2008	Poorly differentiated; Grade III	IIIA	T2	N2	M0	None/Unknown	No/Unknown	6	Dead	61	Complete/Total/Standard Pneumonectomy; Pneumonectomy, Nos
White	Female	2008	Unknown	IIIA	T2	N2	M0	Beam radiation	Yes	50	Dead	77	Complete/Total/Standard Pneumonectomy; Pneumonectomy, Nos
Other (American Indian/AK Native, Asian/Pacific Islander)	Male	2009	Poorly differentiated; Grade III	IIIA	T2	N2	M0	Beam radiation	Yes	29	Dead	65	Complete/Total/Standard Pneumonectomy; Pneumonectomy, Nos
White	Male	2009	Moderately differentiated; Grade II	IIIA	T2	N2	M0	Beam radiation	Yes	5	Dead	77	Complete/Total/Standard Pneumonectomy; Pneumonectomy, Nos
White	Female	2009	Poorly differentiated; Grade III	IIIA	T2	N2	M0	Beam radiation	No/Unknown	78	Alive	55	Complete/Total/Standard Pneumonectomy; Pneumonectomy, Nos
White	Male	2009	Undifferentiated; anaplastic; Grade IV	IIIA	T2	N2	M0	None/Unknown	Yes	23	Dead	51	Complete/Total/Standard Pneumonectomy; Pneumonectomy, Nos
White	Male	2009	Moderately differentiated; Grade II	IIIA	T2	N2	M0	Beam radiation	No/Unknown	3	Dead	67	Complete/Total/Standard Pneumonectomy; Pneumonectomy, Nos
White	Female	2009	Moderately differentiated; Grade II	IIIA	T2	N2	M0	None/Unknown	Yes	59	Dead	48	Complete/Total/Standard Pneumonectomy; Pneumonectomy, Nos
White	Male	2005	Moderately differentiated; Grade II	IV	T2	N2	M1	None/Unknown	Yes	45	Dead	65	Complete/Total/Standard Pneumonectomy; Pneumonectomy, Nos
White	Male	2005	Unknown	IV	T2	N2	M1	Beam radiation	Yes	10	Dead	66	Complete/Total/Standard Pneumonectomy; Pneumonectomy, Nos
Black	Female	2005	Poorly differentiated; Grade III	IV	T2	N2	M1	None/Unknown	No/Unknown	4	Dead	70	Complete/Total/Standard Pneumonectomy; Pneumonectomy, Nos
White	Female	2007	Poorly differentiated; Grade III	IV	T2	N2	M1	None/Unknown	Yes	20	Dead	44	Complete/Total/Standard Pneumonectomy; Pneumonectomy, Nos
White	Male	2009	Poorly differentiated; Grade III	IV	T2	N2	M1	Beam radiation	Yes	37	Dead	67	Complete/Total/Standard Pneumonectomy; Pneumonectomy, Nos
White	Female	2009	Poorly differentiated; Grade III	IV	T2	N2	M1	None/Unknown	No/Unknown	3	Dead	83	Complete/Total/Standard Pneumonectomy; Pneumonectomy, Nos
White	Male	2011	Unknown	IIIA	T2a	N2	M0	None/Unknown	No/Unknown	53	Alive	56	Complete/Total/Standard Pneumonectomy; Pneumonectomy, Nos
White	Male	2011	Poorly differentiated; Grade III	IIIA	T2a	N2	M0	Beam radiation	Yes	15	Dead	65	Complete/Total/Standard Pneumonectomy; Pneumonectomy, Nos
White	Female	2011	Moderately differentiated; Grade II	IIIA	T2a	N2	M0	None/Unknown	Yes	16	Dead	52	Complete/Total/Standard Pneumonectomy; Pneumonectomy, Nos
Black	Female	2011	Poorly differentiated; Grade III	IIIA	T2a	N2	M0	None/Unknown	Yes	44	Dead	51	Complete/Total/Standard Pneumonectomy; Pneumonectomy, Nos
White	Female	2011	Poorly differentiated; Grade III	IIIA	T2a	N2	M0	Refused	Yes	31	Dead	74	Complete/Total/Standard Pneumonectomy; Pneumonectomy, Nos
White	Male	2012	Moderately differentiated; Grade II	IIIA	T2a	N2	M0	Beam radiation	Yes	38	Alive	47	Complete/Total/Standard Pneumonectomy; Pneumonectomy, Nos
White	Female	2014	Moderately differentiated; Grade II	IIIA	T2a	N2	M0	None/Unknown	No/Unknown	21	Dead	77	Complete/Total/Standard Pneumonectomy; Pneumonectomy, Nos
White	Female	2014	Poorly differentiated; Grade III	IIIA	T2a	N2	M0	None/Unknown	No/Unknown	22	Alive	73	Complete/Total/Standard Pneumonectomy; Pneumonectomy, Nos
White	Male	2015	Poorly differentiated; Grade III	IIIA	T2a	N2	M0	None/Unknown	No/Unknown	6	Alive	64	Complete/Total/Standard Pneumonectomy; Pneumonectomy, Nos
White	Female	2010	Poorly differentiated; Grade III	IIIA	T2b	N2	M0	None/Unknown	Yes	12	Dead	44	Complete/Total/Standard Pneumonectomy; Pneumonectomy, Nos
White	Female	2013	Poorly differentiated; Grade III	IIIA	T2b	N2	M0	None/Unknown	No/Unknown	29	Alive	39	Complete/Total/Standard Pneumonectomy; Pneumonectomy, Nos
Black	Female	2014	Poorly differentiated; Grade III	IIIA	T2b	N2	M0	None/Unknown	Yes	17	Alive	67	Complete/Total/Standard Pneumonectomy; Pneumonectomy, Nos
White	Female	2014	Moderately differentiated; Grade II	IIIA	T2b	N2	M0	None/Unknown	Yes	14	Dead	72	Complete/Total/Standard Pneumonectomy; Pneumonectomy, Nos
White	Female	2005	Poorly differentiated; Grade III	IIIA	T3	N2	M0	Beam radiation	Yes	4	Dead	51	Complete/Total/Standard Pneumonectomy; Pneumonectomy, Nos
White	Male	2006	Moderately differentiated; Grade II	IIIA	T3	N2	M0	Beam radiation	Yes	16	Dead	71	Complete/Total/Standard Pneumonectomy; Pneumonectomy, Nos
Black	Male	2007	Poorly differentiated; Grade III	IIIA	T3	N2	M0	None/Unknown	No/Unknown	98	Alive	49	Complete/Total/Standard Pneumonectomy; Pneumonectomy, Nos
White	Male	2007	Poorly differentiated; Grade III	IIIA	T3	N2	M0	Beam radiation	Yes	14	Dead	66	Complete/Total/Standard Pneumonectomy; Pneumonectomy, Nos
White	Female	2008	Poorly differentiated; Grade III	IIIA	T3	N2	M0	None/Unknown	Yes	4	Dead	79	Complete/Total/Standard Pneumonectomy; Pneumonectomy, Nos
White	Female	2008	Unknown	IIIA	T3	N2	M0	None/Unknown	No/Unknown	83	Dead	63	Complete/Total/Standard Pneumonectomy; Pneumonectomy, Nos
White	Female	2009	Unknown	IIIA	T3	N2	M0	Beam radiation	Yes	61	Alive	49	Complete/Total/Standard Pneumonectomy; Pneumonectomy, Nos
Other (American Indian/AK Native, Asian/Pacific Islander)	Female	2010	Poorly differentiated; Grade III	IIIA	T3	N2	M0	Beam radiation	Yes	13	Dead	66	Complete/Total/Standard Pneumonectomy; Pneumonectomy, Nos
White	Male	2010	Poorly differentiated; Grade III	IIIA	T3	N2	M0	None/Unknown	No/Unknown	68	Alive	65	Complete/Total/Standard Pneumonectomy; Pneumonectomy, Nos
Black	Female	2011	Unknown	IIIA	T3	N2	M0	None/Unknown	Yes	49	Alive	63	Complete/Total/Standard Pneumonectomy; Pneumonectomy, Nos
White	Male	2011	Moderately differentiated; Grade II	IIIA	T3	N2	M0	Beam radiation	Yes	47	Dead	64	Complete/Total/Standard Pneumonectomy; Pneumonectomy, Nos
White	Female	2013	Poorly differentiated; Grade III	IIIA	T3	N2	M0	Beam radiation	Yes	21	Dead	61	Complete/Total/Standard Pneumonectomy; Pneumonectomy, Nos
Other (American Indian/AK Native, Asian/Pacific Islander)	Female	2015	Moderately differentiated; Grade II	IV	T3	N2	M1a	None/Unknown	No/Unknown	5	Alive	82	Complete/Total/Standard Pneumonectomy; Pneumonectomy, Nos
White	Female	2004	Well differentiated; Grade I	IIIB	T4	N2	M0	Beam radiation	Yes	28	Dead	51	Complete/Total/Standard Pneumonectomy; Pneumonectomy, Nos
Other (American Indian/AK Native, Asian/Pacific Islander)	Male	2004	Poorly differentiated; Grade III	IIIB	T4	N2	M0	Beam radiation	No/Unknown	26	Dead	50	Complete/Total/Standard Pneumonectomy; Pneumonectomy, Nos
White	Female	2004	Poorly differentiated; Grade III	IIIB	T4	N2	M0	None/Unknown	No/Unknown	14	Dead	64	Complete/Total/Standard Pneumonectomy; Pneumonectomy, Nos
White	Male	2004	Moderately differentiated; Grade II	IIIB	T4	N2	M0	None/Unknown	No/Unknown	8	Dead	71	Complete/Total/Standard Pneumonectomy; Pneumonectomy, Nos
White	Female	2004	Poorly differentiated; Grade III	IIIB	T4	N2	M0	Beam radiation	Yes	44	Dead	62	Complete/Total/Standard Pneumonectomy; Pneumonectomy, Nos
White	Male	2005	Moderately differentiated; Grade II	IIIB	T4	N2	M0	None/Unknown	No/Unknown	1	Dead	64	Complete/Total/Standard Pneumonectomy; Pneumonectomy, Nos
White	Male	2005	Poorly differentiated; Grade III	IIIB	T4	N2	M0	None/Unknown	Yes	121	Alive	65	Complete/Total/Standard Pneumonectomy; Pneumonectomy, Nos
White	Female	2006	Poorly differentiated; Grade III	IIIB	T4	N2	M0	Beam radiation	Yes	98	Dead	51	Complete/Total/Standard Pneumonectomy; Pneumonectomy, Nos
White	Female	2006	Poorly differentiated; Grade III	IIIB	T4	N2	M0	Beam radiation	Yes	31	Dead	60	Complete/Total/Standard Pneumonectomy; Pneumonectomy, Nos
White	Male	2007	Poorly differentiated; Grade III	IIIB	T4	N2	M0	None/Unknown	Yes	37	Dead	77	Complete/Total/Standard Pneumonectomy; Pneumonectomy, Nos
White	Male	2008	Poorly differentiated; Grade III	IIIB	T4	N2	M0	None/Unknown	Yes	9	Dead	75	Complete/Total/Standard Pneumonectomy; Pneumonectomy, Nos
White	Male	2009	Poorly differentiated; Grade III	IIIB	T4	N2	M0	None/Unknown	No/Unknown	10	Dead	69	Complete/Total/Standard Pneumonectomy; Pneumonectomy, Nos
White	Male	2012	Poorly differentiated; Grade III	IIIB	T4	N2	M0	Beam radiation	Yes	28	Dead	51	Complete/Total/Standard Pneumonectomy; Pneumonectomy, Nos
White	Male	2014	Poorly differentiated; Grade III	IIIB	T4	N2	M0	None/Unknown	Yes	20	Alive	70	Complete/Total/Standard Pneumonectomy; Pneumonectomy, Nos
Other (American Indian/AK Native, Asian/Pacific Islander)	Female	2015	Unknown	IIIB	T4	N2	M0	Beam radiation	Yes	11	Alive	65	Complete/Total/Standard Pneumonectomy; Pneumonectomy, Nos
Black	Female	2015	Undifferentiated; anaplastic; Grade IV	IIIB	T4	N2	M0	None/Unknown	Yes	0	Alive	63	Complete/Total/Standard Pneumonectomy; Pneumonectomy, Nos
White	Female	2015	Poorly differentiated; Grade III	IIIB	T4	N2	M0	Beam radiation	Yes	8	Alive	69	Complete/Total/Standard Pneumonectomy; Pneumonectomy, Nos
White	Male	2015	Moderately differentiated; Grade II	IIIB	T4	N2	M0	None/Unknown	Yes	6	Alive	79	Complete/Total/Standard Pneumonectomy; Pneumonectomy, Nos
White	Female	2005	Poorly differentiated; Grade III	IV	T4	N2	M1	None/Unknown	No/Unknown	3	Dead	58	Complete/Total/Standard Pneumonectomy; Pneumonectomy, Nos
Other (American Indian/AK Native, Asian/Pacific Islander)	Female	2006	Moderately differentiated; Grade II	IV	T4	N2	M1	None/Unknown	Yes	56	Dead	63	Complete/Total/Standard Pneumonectomy; Pneumonectomy, Nos
White	Female	2009	Poorly differentiated; Grade III	IV	T4	N2	M1	None/Unknown	No/Unknown	0	Dead	70	Complete/Total/Standard Pneumonectomy; Pneumonectomy, Nos
Other (American Indian/AK Native, Asian/Pacific Islander)	Female	2009	Moderately differentiated; Grade II	IV	T4	N2	M1	Beam radiation	Yes	56	Dead	53	Complete/Total/Standard Pneumonectomy; Pneumonectomy, Nos
Black	Male	2010	Unknown	IV	T4	N2	M1b	Beam radiation	Yes	65	Alive	51	Complete/Total/Standard Pneumonectomy; Pneumonectomy, Nos
White	Male	2011	Poorly differentiated; Grade III	IV	T4	N2	M1b	None/Unknown	No/Unknown	4	Dead	52	Complete/Total/Standard Pneumonectomy; Pneumonectomy, Nos
White	Male	2012	Poorly differentiated; Grade III	IV	T4	N2	M1a	None/Unknown	Yes	16	Dead	67	Complete/Total/Standard Pneumonectomy; Pneumonectomy, Nos
Other (American Indian/AK Native, Asian/Pacific Islander)	Male	2007	Moderately differentiated; Grade II	IIIB	T2	N3	M0	Beam radiation	Yes	106	Alive	44	Complete/Total/Standard Pneumonectomy; Pneumonectomy, Nos
Black	Female	2006	Moderately differentiated; Grade II	IV	T2	N3	M1	None/Unknown	No/Unknown	4	Dead	76	Complete/Total/Standard Pneumonectomy; Pneumonectomy, Nos
White	Female	2014	Poorly differentiated; Grade III	IIIB	T2b	N3	M0	Beam radiation	Yes	14	Dead	63	Complete/Total/Standard Pneumonectomy; Pneumonectomy, Nos
White	Female	2010	Moderately differentiated; Grade II	IIIB	T2NOS	N3	M0	None/Unknown	No/Unknown	1	Dead	72	Complete/Total/Standard Pneumonectomy; Pneumonectomy, Nos
White	Male	2013	Poorly differentiated; Grade III	IIIB	T3	N3	M0	None/Unknown	Yes	4	Dead	76	Complete/Total/Standard Pneumonectomy; Pneumonectomy, Nos
White	Female	2005	Poorly differentiated; Grade III	IV	T4	N3	M1	Beam radiation	Yes	32	Dead	50	Complete/Total/Standard Pneumonectomy; Pneumonectomy, Nos
Black	Male	2007	Unknown	IV	T4	N3	M1	Beam radiation	Yes	2	Dead	54	Complete/Total/Standard Pneumonectomy; Pneumonectomy, Nos
White	Female	2008	Poorly differentiated; Grade III	IV	T4	N3	M1	None/Unknown	No/Unknown	0	Dead	61	Complete/Total/Standard Pneumonectomy; Pneumonectomy, Nos
Black	Male	2005	Poorly differentiated; Grade III	IA	T1	N0	M0	None/Unknown	No/Unknown	6	Dead	66	Extended Pneumonectomy
White	Female	2011	Well differentiated; Grade I	IA	T1a	N0	M0	None/Unknown	No/Unknown	56	Alive	67	Extended Pneumonectomy
Other (American Indian/AK Native, Asian/Pacific Islander)	Female	2014	Unknown	IA	T1a	N0	M0	None/Unknown	No/Unknown	17	Alive	77	Extended Pneumonectomy
Black	Female	2015	Moderately differentiated; Grade II	IA	T1a	N0	M0	None/Unknown	No/Unknown	2	Dead	59	Extended Pneumonectomy
White	Female	2011	Moderately differentiated; Grade II	IA	T1b	N0	M0	None/Unknown	No/Unknown	0	Dead	75	Extended Pneumonectomy
White	Female	2006	Poorly differentiated; Grade III	IB	T2	N0	M0	None/Unknown	Yes	12	Dead	56	Extended Pneumonectomy
White	Female	2006	Poorly differentiated; Grade III	IB	T2	N0	M0	None/Unknown	Yes	19	Dead	62	Extended Pneumonectomy
White	Female	2009	Poorly differentiated; Grade III	IB	T2	N0	M0	None/Unknown	Yes	72	Alive	56	Extended Pneumonectomy
White	Male	2010	Moderately differentiated; Grade II	IB	T2a	N0	M0	None/Unknown	No/Unknown	2	Dead	73	Extended Pneumonectomy
White	Male	2004	Poorly differentiated; Grade III	IIB	T3	N0	M0	None/Unknown	No/Unknown	6	Dead	74	Extended Pneumonectomy
White	Female	2005	Poorly differentiated; Grade III	IIB	T3	N0	M0	Beam radiation	Yes	10	Dead	48	Extended Pneumonectomy
Black	Male	2006	Poorly differentiated; Grade III	IIB	T3	N0	M0	None/Unknown	No/Unknown	13	Dead	50	Extended Pneumonectomy
Black	Male	2008	Poorly differentiated; Grade III	IIB	T3	N0	M0	None/Unknown	Yes	25	Dead	51	Extended Pneumonectomy
White	Male	2008	Poorly differentiated; Grade III	IIB	T3	N0	M0	None/Unknown	Yes	9	Dead	62	Extended Pneumonectomy
White	Male	2011	Poorly differentiated; Grade III	IIB	T3	N0	M0	None/Unknown	No/Unknown	0	Dead	53	Extended Pneumonectomy
White	Female	2012	Poorly differentiated; Grade III	IIB	T3	N0	M0	None/Unknown	No/Unknown	42	Alive	58	Extended Pneumonectomy
White	Female	2014	Poorly differentiated; Grade III	IIB	T3	N0	M0	None/Unknown	No/Unknown	3	Dead	80	Extended Pneumonectomy
Other (American Indian/AK Native, Asian/Pacific Islander)	Male	2015	Poorly differentiated; Grade III	IIB	T3	N0	M0	None/Unknown	No/Unknown	1	Dead	80	Extended Pneumonectomy
White	Female	2004	Poorly differentiated; Grade III	IIB	T2	N1	M0	Beam radiation	No/Unknown	20	Dead	48	Extended Pneumonectomy
White	Male	2005	Poorly differentiated; Grade III	IIB	T2	N1	M0	Radiation, NOS method or source not specified	Yes	17	Dead	62	Extended Pneumonectomy
White	Male	2005	Poorly differentiated; Grade III	IV	T2	N1	M1	None/Unknown	No/Unknown	2	Dead	40	Extended Pneumonectomy
White	Female	2010	Well differentiated; Grade I	IIA	T2a	N1	M0	None/Unknown	Yes	63	Alive	54	Extended Pneumonectomy
White	Female	2008	Poorly differentiated; Grade III	IIIA	T3	N1	M0	None/Unknown	Yes	4	Dead	59	Extended Pneumonectomy
White	Male	2010	Moderately differentiated; Grade II	IIIA	T3	N1	M0	Beam radiation	Yes	7	Dead	57	Extended Pneumonectomy
White	Female	2011	Poorly differentiated; Grade III	IIIA	T3	N1	M0	None/Unknown	Yes	56	Alive	64	Extended Pneumonectomy
White	Male	2014	Poorly differentiated; Grade III	IIIA	T3	N1	M0	None/Unknown	No/Unknown	15	Alive	44	Extended Pneumonectomy
White	Male	2014	Poorly differentiated; Grade III	IIIA	T3	N1	M0	Beam radiation	Yes	7	Dead	63	Extended Pneumonectomy
Other (American Indian/AK Native, Asian/Pacific Islander)	Male	2015	Poorly differentiated; Grade III	IIIA	T3	N1	M0	None/Unknown	Yes	7	Alive	55	Extended Pneumonectomy
White	Male	2015	Poorly differentiated; Grade III	IIIA	T4	N1	M0	None/Unknown	Yes	4	Alive	67	Extended Pneumonectomy
White	Male	2004	Moderately differentiated; Grade II	IIIB	T4	N1	M0	None/Unknown	Yes	22	Dead	55	Extended Pneumonectomy
White	Male	2005	Poorly differentiated; Grade III	IIIB	T4	N1	M0	None/Unknown	No/Unknown	0	Dead	55	Extended Pneumonectomy
Other (American Indian/AK Native, Asian/Pacific Islander)	Male	2005	Poorly differentiated; Grade III	IIIB	T4	N1	M0	Beam radiation	Yes	22	Dead	59	Extended Pneumonectomy
White	Female	2008	Poorly differentiated; Grade III	IIIB	T4	N1	M0	None/Unknown	Yes	26	Dead	69	Extended Pneumonectomy
White	Female	2004	Poorly differentiated; Grade III	IV	T4	N1	M1	Beam radiation	Yes	44	Dead	64	Extended Pneumonectomy
White	Female	2004	Moderately differentiated; Grade II	IV	T4	N1	M1	None/Unknown	No/Unknown	4	Dead	58	Extended Pneumonectomy
Other (American Indian/AK Native, Asian/Pacific Islander)	Male	2008	Unknown	IV	T4	N1	M1	Beam radiation	Yes	13	Dead	66	Extended Pneumonectomy
Black	Male	2005	Poorly differentiated; Grade III	IIIA	T2	N2	M0	None/Unknown	Yes	127	Alive	49	Extended Pneumonectomy
Other (American Indian/AK Native, Asian/Pacific Islander)	Female	2009	Poorly differentiated; Grade III	IIIA	T2	N2	M0	Beam radiation	Yes	78	Alive	54	Extended Pneumonectomy
Black	Male	2012	Poorly differentiated; Grade III	IIIA	T2b	N2	M0	Beam radiation	Yes	38	Alive	55	Extended Pneumonectomy
White	Female	2004	Moderately differentiated; Grade II	IIIA	T3	N2	M0	None/Unknown	No/Unknown	1	Dead	73	Extended Pneumonectomy
White	Male	2007	Poorly differentiated; Grade III	IIIA	T3	N2	M0	Beam radiation	Yes	23	Dead	52	Extended Pneumonectomy
White	Female	2013	Poorly differentiated; Grade III	IIIA	T3	N2	M0	None/Unknown	Yes	32	Alive	54	Extended Pneumonectomy
White	Female	2010	Unknown	IV	T3	N2	M1a	Beam radiation	Yes	64	Alive	22	Extended Pneumonectomy
White	Female	2011	Poorly differentiated; Grade III	IV	T3	N2	M1a	None/Unknown	No/Unknown	5	Dead	49	Extended Pneumonectomy
White	Female	2012	Poorly differentiated; Grade III	IV	T3	N2	M1b	Beam radiation	Yes	42	Alive	28	Extended Pneumonectomy
White	Male	2004	Moderately differentiated; Grade II	IIIB	T4	N2	M0	None/Unknown	Yes	29	Dead	53	Extended Pneumonectomy
White	Male	2005	Poorly differentiated; Grade III	IIIB	T4	N2	M0	None/Unknown	Yes	4	Dead	60	Extended Pneumonectomy
White	Male	2006	Poorly differentiated; Grade III	IIIB	T4	N2	M0	Beam radiation	Yes	6	Dead	68	Extended Pneumonectomy
White	Male	2006	Moderately differentiated; Grade II	IIIB	T4	N2	M0	None/Unknown	No/Unknown	2	Dead	84	Extended Pneumonectomy
White	Male	2011	Poorly differentiated; Grade III	IIIB	T4	N2	M0	None/Unknown	No/Unknown	7	Dead	52	Extended Pneumonectomy
White	Female	2015	Poorly differentiated; Grade III	IIIB	T4	N2	M0	Beam radiation	Yes	10	Alive	58	Extended Pneumonectomy
White	Male	2004	Moderately differentiated; Grade II	IV	T4	N2	M1	None/Unknown	No/Unknown	2	Dead	61	Extended Pneumonectomy
Black	Male	2012	Poorly differentiated; Grade III	IIIB	T3	N3	M0	Beam radiation	Yes	16	Dead	61	Extended Pneumonectomy
Other (American Indian/AK Native, Asian/Pacific Islander)	Female	2011	Poorly differentiated; Grade III	IV	T4	N3	M1a	Beam radiation	Yes	7	Dead	35	Extended Pneumonectomy
Black	Female	2004	Moderately differentiated; Grade II	IA	T1	N0	M0	None/Unknown	No/Unknown	136	Alive	48	Lobectomy/Bilobectomy
Black	Female	2004	Moderately differentiated; Grade II	IA	T1	N0	M0	None/Unknown	No/Unknown	137	Alive	43	Lobectomy/Bilobectomy
White	Male	2004	Poorly differentiated; Grade III	IA	T1	N0	M0	None/Unknown	No/Unknown	3	Dead	71	Lobectomy/Bilobectomy
White	Female	2004	Well differentiated; Grade I	IA	T1	N0	M0	None/Unknown	No/Unknown	135	Alive	71	Lobectomy/Bilobectomy
Other (American Indian/AK Native, Asian/Pacific Islander)	Female	2004	Moderately differentiated; Grade II	IA	T1	N0	M0	None/Unknown	No/Unknown	103	Dead	68	Lobectomy/Bilobectomy
White	Female	2004	Well differentiated; Grade I	IA	T1	N0	M0	None/Unknown	No/Unknown	68	Dead	64	Lobectomy/Bilobectomy
White	Male	2004	Moderately differentiated; Grade II	IA	T1	N0	M0	None/Unknown	No/Unknown	40	Dead	76	Lobectomy/Bilobectomy
Black	Female	2004	Poorly differentiated; Grade III	IA	T1	N0	M0	None/Unknown	Yes	136	Alive	39	Lobectomy/Bilobectomy
Other (American Indian/AK Native, Asian/Pacific Islander)	Female	2004	Moderately differentiated; Grade II	IA	T1	N0	M0	None/Unknown	No/Unknown	31	Dead	71	Lobectomy/Bilobectomy
White	Male	2004	Moderately differentiated; Grade II	IA	T1	N0	M0	None/Unknown	No/Unknown	141	Alive	69	Lobectomy/Bilobectomy
White	Female	2004	Unknown	IA	T1	N0	M0	None/Unknown	No/Unknown	20	Dead	69	Lobectomy/Bilobectomy
White	Male	2004	Moderately differentiated; Grade II	IA	T1	N0	M0	None/Unknown	No/Unknown	140	Alive	71	Lobectomy/Bilobectomy
White	Female	2004	Well differentiated; Grade I	IA	T1	N0	M0	None/Unknown	No/Unknown	66	Dead	69	Lobectomy/Bilobectomy
Black	Female	2004	Moderately differentiated; Grade II	IA	T1	N0	M0	None/Unknown	Yes	143	Alive	54	Lobectomy/Bilobectomy
White	Male	2004	Moderately differentiated; Grade II	IA	T1	N0	M0	None/Unknown	No/Unknown	136	Alive	60	Lobectomy/Bilobectomy
White	Male	2004	Poorly differentiated; Grade III	IA	T1	N0	M0	None/Unknown	No/Unknown	139	Alive	58	Lobectomy/Bilobectomy
Other (American Indian/AK Native, Asian/Pacific Islander)	Female	2004	Moderately differentiated; Grade II	IA	T1	N0	M0	None/Unknown	Yes	130	Dead	56	Lobectomy/Bilobectomy
White	Female	2004	Moderately differentiated; Grade II	IA	T1	N0	M0	None/Unknown	No/Unknown	138	Alive	61	Lobectomy/Bilobectomy
White	Male	2004	Moderately differentiated; Grade II	IA	T1	N0	M0	None/Unknown	No/Unknown	22	Dead	90	Lobectomy/Bilobectomy
White	Male	2004	Poorly differentiated; Grade III	IA	T1	N0	M0	None/Unknown	No/Unknown	14	Dead	75	Lobectomy/Bilobectomy
Other (American Indian/AK Native, Asian/Pacific Islander)	Male	2004	Poorly differentiated; Grade III	IA	T1	N0	M0	None/Unknown	No/Unknown	47	Dead	71	Lobectomy/Bilobectomy
Other (American Indian/AK Native, Asian/Pacific Islander)	Male	2004	Moderately differentiated; Grade II	IA	T1	N0	M0	None/Unknown	No/Unknown	139	Alive	57	Lobectomy/Bilobectomy
White	Male	2004	Moderately differentiated; Grade II	IA	T1	N0	M0	Beam radiation	No/Unknown	136	Alive	61	Lobectomy/Bilobectomy
White	Female	2004	Moderately differentiated; Grade II	IA	T1	N0	M0	None/Unknown	No/Unknown	135	Alive	51	Lobectomy/Bilobectomy
Other (American Indian/AK Native, Asian/Pacific Islander)	Female	2004	Moderately differentiated; Grade II	IA	T1	N0	M0	None/Unknown	No/Unknown	139	Alive	70	Lobectomy/Bilobectomy
White	Female	2004	Moderately differentiated; Grade II	IA	T1	N0	M0	None/Unknown	No/Unknown	138	Alive	53	Lobectomy/Bilobectomy
White	Male	2004	Moderately differentiated; Grade II	IA	T1	N0	M0	None/Unknown	No/Unknown	122	Dead	77	Lobectomy/Bilobectomy
Other (American Indian/AK Native, Asian/Pacific Islander)	Female	2004	Moderately differentiated; Grade II	IA	T1	N0	M0	None/Unknown	No/Unknown	100	Dead	79	Lobectomy/Bilobectomy
Black	Female	2004	Moderately differentiated; Grade II	IA	T1	N0	M0	None/Unknown	No/Unknown	58	Dead	52	Lobectomy/Bilobectomy
White	Female	2004	Moderately differentiated; Grade II	IA	T1	N0	M0	None/Unknown	No/Unknown	15	Dead	82	Lobectomy/Bilobectomy
White	Male	2004	Moderately differentiated; Grade II	IA	T1	N0	M0	None/Unknown	No/Unknown	124	Dead	77	Lobectomy/Bilobectomy
Other (American Indian/AK Native, Asian/Pacific Islander)	Female	2004	Well differentiated; Grade I	IA	T1	N0	M0	None/Unknown	No/Unknown	132	Alive	61	Lobectomy/Bilobectomy
Other (American Indian/AK Native, Asian/Pacific Islander)	Female	2004	Well differentiated; Grade I	IA	T1	N0	M0	None/Unknown	No/Unknown	65	Dead	58	Lobectomy/Bilobectomy
White	Female	2004	Moderately differentiated; Grade II	IA	T1	N0	M0	None/Unknown	No/Unknown	44	Dead	53	Lobectomy/Bilobectomy
White	Female	2004	Poorly differentiated; Grade III	IA	T1	N0	M0	None/Unknown	Yes	142	Alive	49	Lobectomy/Bilobectomy
Other (American Indian/AK Native, Asian/Pacific Islander)	Male	2004	Moderately differentiated; Grade II	IA	T1	N0	M0	None/Unknown	No/Unknown	141	Alive	64	Lobectomy/Bilobectomy
White	Female	2004	Moderately differentiated; Grade II	IA	T1	N0	M0	None/Unknown	No/Unknown	14	Dead	64	Lobectomy/Bilobectomy
White	Male	2004	Poorly differentiated; Grade III	IA	T1	N0	M0	None/Unknown	No/Unknown	64	Dead	54	Lobectomy/Bilobectomy
White	Female	2004	Unknown	IA	T1	N0	M0	None/Unknown	No/Unknown	4	Dead	65	Lobectomy/Bilobectomy
Other (American Indian/AK Native, Asian/Pacific Islander)	Male	2004	Moderately differentiated; Grade II	IA	T1	N0	M0	None/Unknown	No/Unknown	134	Alive	62	Lobectomy/Bilobectomy
White	Female	2004	Well differentiated; Grade I	IA	T1	N0	M0	None/Unknown	No/Unknown	136	Alive	65	Lobectomy/Bilobectomy
White	Female	2004	Well differentiated; Grade I	IA	T1	N0	M0	None/Unknown	Yes	66	Dead	55	Lobectomy/Bilobectomy
White	Female	2004	Unknown	IA	T1	N0	M0	None/Unknown	No/Unknown	141	Alive	76	Lobectomy/Bilobectomy
White	Male	2004	Moderately differentiated; Grade II	IA	T1	N0	M0	None/Unknown	No/Unknown	132	Alive	64	Lobectomy/Bilobectomy
White	Male	2004	Poorly differentiated; Grade III	IA	T1	N0	M0	None/Unknown	No/Unknown	4	Dead	85	Lobectomy/Bilobectomy
White	Female	2004	Moderately differentiated; Grade II	IA	T1	N0	M0	None/Unknown	No/Unknown	67	Dead	74	Lobectomy/Bilobectomy
Black	Female	2004	Moderately differentiated; Grade II	IA	T1	N0	M0	None/Unknown	No/Unknown	12	Dead	49	Lobectomy/Bilobectomy
White	Male	2004	Moderately differentiated; Grade II	IA	T1	N0	M0	None/Unknown	No/Unknown	27	Dead	79	Lobectomy/Bilobectomy
White	Male	2004	Well differentiated; Grade I	IA	T1	N0	M0	None/Unknown	No/Unknown	16	Dead	80	Lobectomy/Bilobectomy
White	Female	2004	Moderately differentiated; Grade II	IA	T1	N0	M0	None/Unknown	No/Unknown	37	Dead	80	Lobectomy/Bilobectomy
White	Male	2004	Poorly differentiated; Grade III	IA	T1	N0	M0	None/Unknown	No/Unknown	29	Dead	70	Lobectomy/Bilobectomy
White	Female	2004	Moderately differentiated; Grade II	IA	T1	N0	M0	None/Unknown	No/Unknown	44	Dead	50	Lobectomy/Bilobectomy
White	Male	2004	Moderately differentiated; Grade II	IA	T1	N0	M0	None/Unknown	No/Unknown	50	Dead	86	Lobectomy/Bilobectomy
White	Male	2004	Well differentiated; Grade I	IA	T1	N0	M0	None/Unknown	No/Unknown	3	Dead	76	Lobectomy/Bilobectomy
White	Male	2004	Poorly differentiated; Grade III	IA	T1	N0	M0	None/Unknown	No/Unknown	24	Dead	77	Lobectomy/Bilobectomy
White	Male	2004	Moderately differentiated; Grade II	IA	T1	N0	M0	None/Unknown	No/Unknown	142	Alive	63	Lobectomy/Bilobectomy
White	Female	2004	Moderately differentiated; Grade II	IA	T1	N0	M0	None/Unknown	No/Unknown	1	Dead	77	Lobectomy/Bilobectomy
White	Male	2004	Well differentiated; Grade I	IA	T1	N0	M0	None/Unknown	No/Unknown	122	Dead	58	Lobectomy/Bilobectomy
White	Female	2004	Poorly differentiated; Grade III	IA	T1	N0	M0	Beam radiation	Yes	140	Alive	51	Lobectomy/Bilobectomy
White	Female	2004	Moderately differentiated; Grade II	IA	T1	N0	M0	None/Unknown	No/Unknown	91	Dead	74	Lobectomy/Bilobectomy
White	Female	2004	Poorly differentiated; Grade III	IA	T1	N0	M0	None/Unknown	No/Unknown	90	Dead	73	Lobectomy/Bilobectomy
White	Female	2004	Well differentiated; Grade I	IA	T1	N0	M0	None/Unknown	Yes	3	Alive	47	Lobectomy/Bilobectomy
White	Male	2004	Poorly differentiated; Grade III	IA	T1	N0	M0	None/Unknown	No/Unknown	141	Alive	49	Lobectomy/Bilobectomy
White	Female	2004	Well differentiated; Grade I	IA	T1	N0	M0	None/Unknown	No/Unknown	30	Dead	79	Lobectomy/Bilobectomy
White	Male	2004	Moderately differentiated; Grade II	IA	T1	N0	M0	None/Unknown	No/Unknown	134	Dead	63	Lobectomy/Bilobectomy
White	Female	2004	Moderately differentiated; Grade II	IA	T1	N0	M0	None/Unknown	No/Unknown	52	Dead	51	Lobectomy/Bilobectomy
White	Male	2004	Unknown	IA	T1	N0	M0	None/Unknown	No/Unknown	140	Alive	61	Lobectomy/Bilobectomy
Black	Male	2004	Moderately differentiated; Grade II	IA	T1	N0	M0	None/Unknown	No/Unknown	142	Alive	57	Lobectomy/Bilobectomy
Black	Female	2004	Moderately differentiated; Grade II	IA	T1	N0	M0	None/Unknown	No/Unknown	113	Dead	79	Lobectomy/Bilobectomy
White	Female	2004	Poorly differentiated; Grade III	IA	T1	N0	M0	None/Unknown	No/Unknown	63	Dead	64	Lobectomy/Bilobectomy
White	Female	2004	Poorly differentiated; Grade III	IA	T1	N0	M0	None/Unknown	No/Unknown	29	Dead	59	Lobectomy/Bilobectomy
White	Male	2004	Poorly differentiated; Grade III	IA	T1	N0	M0	None/Unknown	No/Unknown	97	Dead	76	Lobectomy/Bilobectomy
White	Male	2004	Moderately differentiated; Grade II	IA	T1	N0	M0	None/Unknown	No/Unknown	126	Dead	66	Lobectomy/Bilobectomy
White	Female	2004	Poorly differentiated; Grade III	IA	T1	N0	M0	None/Unknown	No/Unknown	139	Alive	56	Lobectomy/Bilobectomy
White	Female	2004	Poorly differentiated; Grade III	IA	T1	N0	M0	None/Unknown	No/Unknown	125	Dead	58	Lobectomy/Bilobectomy
White	Female	2004	Poorly differentiated; Grade III	IA	T1	N0	M0	None/Unknown	No/Unknown	99	Dead	67	Lobectomy/Bilobectomy
White	Female	2004	Poorly differentiated; Grade III	IA	T1	N0	M0	None/Unknown	No/Unknown	135	Alive	77	Lobectomy/Bilobectomy
White	Female	2004	Poorly differentiated; Grade III	IA	T1	N0	M0	None/Unknown	No/Unknown	8	Dead	76	Lobectomy/Bilobectomy
White	Female	2004	Moderately differentiated; Grade II	IA	T1	N0	M0	None/Unknown	Yes	132	Alive	62	Lobectomy/Bilobectomy
White	Female	2004	Poorly differentiated; Grade III	IA	T1	N0	M0	None/Unknown	No/Unknown	139	Alive	47	Lobectomy/Bilobectomy
Other (American Indian/AK Native, Asian/Pacific Islander)	Male	2004	Moderately differentiated; Grade II	IA	T1	N0	M0	None/Unknown	No/Unknown	65	Dead	50	Lobectomy/Bilobectomy
White	Male	2004	Moderately differentiated; Grade II	IA	T1	N0	M0	None/Unknown	No/Unknown	21	Dead	74	Lobectomy/Bilobectomy
White	Female	2004	Moderately differentiated; Grade II	IA	T1	N0	M0	None/Unknown	No/Unknown	89	Dead	74	Lobectomy/Bilobectomy
White	Female	2004	Well differentiated; Grade I	IA	T1	N0	M0	None/Unknown	No/Unknown	134	Alive	61	Lobectomy/Bilobectomy
White	Female	2004	Poorly differentiated; Grade III	IA	T1	N0	M0	None/Unknown	No/Unknown	36	Dead	61	Lobectomy/Bilobectomy
White	Male	2004	Poorly differentiated; Grade III	IA	T1	N0	M0	None/Unknown	No/Unknown	139	Dead	53	Lobectomy/Bilobectomy
White	Male	2004	Moderately differentiated; Grade II	IA	T1	N0	M0	None/Unknown	No/Unknown	142	Alive	77	Lobectomy/Bilobectomy
White	Female	2004	Moderately differentiated; Grade II	IA	T1	N0	M0	None/Unknown	No/Unknown	43	Dead	77	Lobectomy/Bilobectomy
White	Female	2004	Well differentiated; Grade I	IA	T1	N0	M0	None/Unknown	No/Unknown	134	Alive	51	Lobectomy/Bilobectomy
White	Female	2004	Moderately differentiated; Grade II	IA	T1	N0	M0	None/Unknown	No/Unknown	135	Alive	46	Lobectomy/Bilobectomy
White	Female	2004	Well differentiated; Grade I	IA	T1	N0	M0	None/Unknown	No/Unknown	143	Alive	64	Lobectomy/Bilobectomy
White	Male	2004	Poorly differentiated; Grade III	IA	T1	N0	M0	None/Unknown	No/Unknown	118	Dead	72	Lobectomy/Bilobectomy
White	Female	2004	Moderately differentiated; Grade II	IA	T1	N0	M0	None/Unknown	No/Unknown	44	Dead	66	Lobectomy/Bilobectomy
White	Female	2004	Well differentiated; Grade I	IA	T1	N0	M0	None/Unknown	No/Unknown	20	Dead	78	Lobectomy/Bilobectomy
White	Male	2004	Well differentiated; Grade I	IA	T1	N0	M0	None/Unknown	No/Unknown	143	Alive	56	Lobectomy/Bilobectomy
White	Female	2004	Poorly differentiated; Grade III	IA	T1	N0	M0	None/Unknown	No/Unknown	103	Dead	63	Lobectomy/Bilobectomy
White	Female	2004	Poorly differentiated; Grade III	IA	T1	N0	M0	None/Unknown	No/Unknown	133	Alive	44	Lobectomy/Bilobectomy
White	Male	2004	Moderately differentiated; Grade II	IA	T1	N0	M0	None/Unknown	No/Unknown	66	Dead	83	Lobectomy/Bilobectomy
White	Male	2004	Well differentiated; Grade I	IA	T1	N0	M0	None/Unknown	No/Unknown	138	Alive	54	Lobectomy/Bilobectomy
White	Male	2004	Poorly differentiated; Grade III	IA	T1	N0	M0	None/Unknown	No/Unknown	76	Dead	74	Lobectomy/Bilobectomy
White	Male	2004	Moderately differentiated; Grade II	IA	T1	N0	M0	None/Unknown	No/Unknown	140	Alive	76	Lobectomy/Bilobectomy
White	Male	2004	Moderately differentiated; Grade II	IA	T1	N0	M0	None/Unknown	No/Unknown	44	Dead	75	Lobectomy/Bilobectomy
White	Male	2004	Poorly differentiated; Grade III	IA	T1	N0	M0	None/Unknown	No/Unknown	139	Alive	66	Lobectomy/Bilobectomy
White	Male	2004	Moderately differentiated; Grade II	IA	T1	N0	M0	None/Unknown	No/Unknown	6	Dead	59	Lobectomy/Bilobectomy
White	Male	2004	Unknown	IA	T1	N0	M0	None/Unknown	No/Unknown	133	Alive	62	Lobectomy/Bilobectomy
White	Female	2004	Moderately differentiated; Grade II	IA	T1	N0	M0	None/Unknown	No/Unknown	143	Alive	72	Lobectomy/Bilobectomy
White	Female	2004	Moderately differentiated; Grade II	IA	T1	N0	M0	None/Unknown	Yes	33	Dead	55	Lobectomy/Bilobectomy
Black	Female	2004	Poorly differentiated; Grade III	IA	T1	N0	M0	None/Unknown	No/Unknown	141	Alive	54	Lobectomy/Bilobectomy
White	Female	2004	Poorly differentiated; Grade III	IA	T1	N0	M0	Beam radiation	Yes	15	Dead	58	Lobectomy/Bilobectomy
White	Male	2004	Poorly differentiated; Grade III	IA	T1	N0	M0	None/Unknown	No/Unknown	70	Dead	63	Lobectomy/Bilobectomy
White	Female	2004	Poorly differentiated; Grade III	IA	T1	N0	M0	None/Unknown	No/Unknown	4	Dead	73	Lobectomy/Bilobectomy
White	Male	2004	Well differentiated; Grade I	IA	T1	N0	M0	None/Unknown	No/Unknown	134	Alive	75	Lobectomy/Bilobectomy
White	Male	2004	Moderately differentiated; Grade II	IA	T1	N0	M0	None/Unknown	No/Unknown	43	Dead	87	Lobectomy/Bilobectomy
White	Male	2004	Unknown	IA	T1	N0	M0	None/Unknown	No/Unknown	55	Dead	80	Lobectomy/Bilobectomy
White	Female	2004	Moderately differentiated; Grade II	IA	T1	N0	M0	None/Unknown	No/Unknown	137	Alive	74	Lobectomy/Bilobectomy
White	Male	2004	Moderately differentiated; Grade II	IA	T1	N0	M0	None/Unknown	No/Unknown	132	Alive	80	Lobectomy/Bilobectomy
White	Female	2004	Well differentiated; Grade I	IA	T1	N0	M0	None/Unknown	No/Unknown	136	Dead	69	Lobectomy/Bilobectomy
White	Male	2004	Poorly differentiated; Grade III	IA	T1	N0	M0	None/Unknown	No/Unknown	139	Alive	71	Lobectomy/Bilobectomy
White	Female	2004	Moderately differentiated; Grade II	IA	T1	N0	M0	None/Unknown	No/Unknown	13	Dead	74	Lobectomy/Bilobectomy
White	Female	2004	Well differentiated; Grade I	IA	T1	N0	M0	None/Unknown	Yes	96	Dead	71	Lobectomy/Bilobectomy
White	Male	2004	Well differentiated; Grade I	IA	T1	N0	M0	None/Unknown	No/Unknown	43	Dead	72	Lobectomy/Bilobectomy
White	Female	2004	Unknown	IA	T1	N0	M0	None/Unknown	No/Unknown	102	Dead	75	Lobectomy/Bilobectomy
White	Female	2004	Poorly differentiated; Grade III	IA	T1	N0	M0	None/Unknown	No/Unknown	126	Dead	62	Lobectomy/Bilobectomy
White	Male	2004	Moderately differentiated; Grade II	IA	T1	N0	M0	None/Unknown	No/Unknown	137	Alive	64	Lobectomy/Bilobectomy
White	Male	2004	Poorly differentiated; Grade III	IA	T1	N0	M0	None/Unknown	No/Unknown	12	Dead	84	Lobectomy/Bilobectomy
White	Female	2004	Moderately differentiated; Grade II	IA	T1	N0	M0	None/Unknown	Yes	123	Alive	53	Lobectomy/Bilobectomy
Black	Female	2004	Moderately differentiated; Grade II	IA	T1	N0	M0	None/Unknown	Yes	136	Alive	54	Lobectomy/Bilobectomy
White	Female	2004	Moderately differentiated; Grade II	IA	T1	N0	M0	None/Unknown	No/Unknown	136	Alive	79	Lobectomy/Bilobectomy
White	Male	2004	Moderately differentiated; Grade II	IA	T1	N0	M0	None/Unknown	No/Unknown	47	Dead	74	Lobectomy/Bilobectomy
White	Male	2004	Poorly differentiated; Grade III	IA	T1	N0	M0	None/Unknown	No/Unknown	54	Dead	76	Lobectomy/Bilobectomy
White	Female	2004	Well differentiated; Grade I	IA	T1	N0	M0	None/Unknown	No/Unknown	141	Alive	75	Lobectomy/Bilobectomy
White	Male	2004	Moderately differentiated; Grade II	IA	T1	N0	M0	None/Unknown	No/Unknown	85	Dead	47	Lobectomy/Bilobectomy
Black	Female	2004	Moderately differentiated; Grade II	IA	T1	N0	M0	None/Unknown	No/Unknown	135	Alive	44	Lobectomy/Bilobectomy
Black	Female	2004	Moderately differentiated; Grade II	IA	T1	N0	M0	None/Unknown	Yes	124	Dead	65	Lobectomy/Bilobectomy
White	Female	2004	Moderately differentiated; Grade II	IA	T1	N0	M0	None/Unknown	No/Unknown	105	Dead	73	Lobectomy/Bilobectomy
White	Female	2004	Poorly differentiated; Grade III	IA	T1	N0	M0	Beam radiation	Yes	79	Dead	53	Lobectomy/Bilobectomy
Black	Male	2004	Moderately differentiated; Grade II	IA	T1	N0	M0	None/Unknown	No/Unknown	23	Dead	59	Lobectomy/Bilobectomy
White	Female	2004	Moderately differentiated; Grade II	IA	T1	N0	M0	None/Unknown	No/Unknown	131	Dead	76	Lobectomy/Bilobectomy
White	Female	2004	Moderately differentiated; Grade II	IA	T1	N0	M0	None/Unknown	No/Unknown	73	Dead	58	Lobectomy/Bilobectomy
White	Male	2004	Poorly differentiated; Grade III	IA	T1	N0	M0	None/Unknown	No/Unknown	142	Alive	76	Lobectomy/Bilobectomy
White	Male	2004	Moderately differentiated; Grade II	IA	T1	N0	M0	None/Unknown	No/Unknown	52	Dead	68	Lobectomy/Bilobectomy
White	Male	2004	Moderately differentiated; Grade II	IA	T1	N0	M0	None/Unknown	No/Unknown	92	Dead	62	Lobectomy/Bilobectomy
White	Female	2004	Moderately differentiated; Grade II	IA	T1	N0	M0	None/Unknown	No/Unknown	137	Alive	65	Lobectomy/Bilobectomy
White	Male	2004	Moderately differentiated; Grade II	IA	T1	N0	M0	None/Unknown	No/Unknown	59	Dead	83	Lobectomy/Bilobectomy
White	Female	2004	Poorly differentiated; Grade III	IA	T1	N0	M0	None/Unknown	No/Unknown	119	Alive	63	Lobectomy/Bilobectomy
White	Female	2004	Moderately differentiated; Grade II	IA	T1	N0	M0	None/Unknown	No/Unknown	51	Dead	76	Lobectomy/Bilobectomy
White	Male	2004	Well differentiated; Grade I	IA	T1	N0	M0	None/Unknown	No/Unknown	133	Alive	51	Lobectomy/Bilobectomy
Black	Male	2004	Moderately differentiated; Grade II	IA	T1	N0	M0	None/Unknown	No/Unknown	137	Alive	59	Lobectomy/Bilobectomy
White	Male	2004	Moderately differentiated; Grade II	IA	T1	N0	M0	None/Unknown	No/Unknown	22	Dead	79	Lobectomy/Bilobectomy
White	Male	2004	Moderately differentiated; Grade II	IA	T1	N0	M0	None/Unknown	No/Unknown	28	Dead	75	Lobectomy/Bilobectomy
White	Female	2004	Poorly differentiated; Grade III	IA	T1	N0	M0	None/Unknown	No/Unknown	20	Dead	79	Lobectomy/Bilobectomy
White	Female	2004	Moderately differentiated; Grade II	IA	T1	N0	M0	None/Unknown	No/Unknown	136	Alive	54	Lobectomy/Bilobectomy
Unknown	Female	2004	Moderately differentiated; Grade II	IA	T1	N0	M0	None/Unknown	Yes	135	Alive	54	Lobectomy/Bilobectomy
White	Female	2004	Moderately differentiated; Grade II	IA	T1	N0	M0	None/Unknown	No/Unknown	133	Alive	62	Lobectomy/Bilobectomy
White	Female	2004	Well differentiated; Grade I	IA	T1	N0	M0	None/Unknown	No/Unknown	127	Dead	67	Lobectomy/Bilobectomy
White	Male	2004	Well differentiated; Grade I	IA	T1	N0	M0	None/Unknown	No/Unknown	14	Dead	73	Lobectomy/Bilobectomy
White	Male	2004	Moderately differentiated; Grade II	IA	T1	N0	M0	None/Unknown	No/Unknown	79	Dead	65	Lobectomy/Bilobectomy
White	Male	2004	Unknown	IA	T1	N0	M0	None/Unknown	No/Unknown	54	Dead	74	Lobectomy/Bilobectomy
White	Male	2004	Moderately differentiated; Grade II	IA	T1	N0	M0	None/Unknown	No/Unknown	140	Alive	63	Lobectomy/Bilobectomy
White	Male	2004	Moderately differentiated; Grade II	IA	T1	N0	M0	None/Unknown	No/Unknown	121	Dead	79	Lobectomy/Bilobectomy
White	Female	2004	Well differentiated; Grade I	IA	T1	N0	M0	None/Unknown	No/Unknown	140	Alive	49	Lobectomy/Bilobectomy
White	Female	2004	Well differentiated; Grade I	IA	T1	N0	M0	None/Unknown	No/Unknown	134	Alive	66	Lobectomy/Bilobectomy
White	Female	2004	Poorly differentiated; Grade III	IA	T1	N0	M0	None/Unknown	No/Unknown	133	Alive	55	Lobectomy/Bilobectomy
White	Female	2004	Well differentiated; Grade I	IA	T1	N0	M0	None/Unknown	No/Unknown	132	Alive	62	Lobectomy/Bilobectomy
Other (American Indian/AK Native, Asian/Pacific Islander)	Female	2004	Moderately differentiated; Grade II	IA	T1	N0	M0	None/Unknown	No/Unknown	48	Dead	83	Lobectomy/Bilobectomy
Other (American Indian/AK Native, Asian/Pacific Islander)	Male	2004	Moderately differentiated; Grade II	IA	T1	N0	M0	None/Unknown	No/Unknown	83	Dead	83	Lobectomy/Bilobectomy
Other (American Indian/AK Native, Asian/Pacific Islander)	Male	2004	Moderately differentiated; Grade II	IA	T1	N0	M0	None/Unknown	No/Unknown	135	Alive	79	Lobectomy/Bilobectomy
Other (American Indian/AK Native, Asian/Pacific Islander)	Female	2004	Well differentiated; Grade I	IA	T1	N0	M0	None/Unknown	No/Unknown	115	Dead	69	Lobectomy/Bilobectomy
Other (American Indian/AK Native, Asian/Pacific Islander)	Male	2004	Poorly differentiated; Grade III	IA	T1	N0	M0	None/Unknown	No/Unknown	24	Dead	72	Lobectomy/Bilobectomy
Other (American Indian/AK Native, Asian/Pacific Islander)	Male	2004	Well differentiated; Grade I	IA	T1	N0	M0	None/Unknown	No/Unknown	53	Dead	84	Lobectomy/Bilobectomy
White	Male	2004	Moderately differentiated; Grade II	IA	T1	N0	M0	Beam radiation	No/Unknown	26	Dead	73	Lobectomy/Bilobectomy
Other (American Indian/AK Native, Asian/Pacific Islander)	Female	2004	Moderately differentiated; Grade II	IA	T1	N0	M0	None/Unknown	No/Unknown	66	Dead	58	Lobectomy/Bilobectomy
Other (American Indian/AK Native, Asian/Pacific Islander)	Female	2004	Moderately differentiated; Grade II	IA	T1	N0	M0	None/Unknown	No/Unknown	129	Dead	77	Lobectomy/Bilobectomy
Other (American Indian/AK Native, Asian/Pacific Islander)	Male	2004	Moderately differentiated; Grade II	IA	T1	N0	M0	None/Unknown	No/Unknown	74	Dead	62	Lobectomy/Bilobectomy
Other (American Indian/AK Native, Asian/Pacific Islander)	Female	2004	Moderately differentiated; Grade II	IA	T1	N0	M0	None/Unknown	No/Unknown	136	Alive	49	Lobectomy/Bilobectomy
Other (American Indian/AK Native, Asian/Pacific Islander)	Male	2004	Poorly differentiated; Grade III	IA	T1	N0	M0	None/Unknown	No/Unknown	22	Dead	77	Lobectomy/Bilobectomy
White	Male	2004	Moderately differentiated; Grade II	IA	T1	N0	M0	None/Unknown	No/Unknown	132	Alive	72	Lobectomy/Bilobectomy
Other (American Indian/AK Native, Asian/Pacific Islander)	Female	2004	Poorly differentiated; Grade III	IA	T1	N0	M0	None/Unknown	No/Unknown	143	Alive	65	Lobectomy/Bilobectomy
White	Male	2004	Well differentiated; Grade I	IA	T1	N0	M0	None/Unknown	No/Unknown	135	Alive	59	Lobectomy/Bilobectomy
Other (American Indian/AK Native, Asian/Pacific Islander)	Female	2004	Poorly differentiated; Grade III	IA	T1	N0	M0	None/Unknown	No/Unknown	135	Alive	66	Lobectomy/Bilobectomy
Other (American Indian/AK Native, Asian/Pacific Islander)	Male	2004	Moderately differentiated; Grade II	IA	T1	N0	M0	None/Unknown	No/Unknown	143	Alive	68	Lobectomy/Bilobectomy
Other (American Indian/AK Native, Asian/Pacific Islander)	Female	2004	Poorly differentiated; Grade III	IA	T1	N0	M0	None/Unknown	No/Unknown	44	Dead	62	Lobectomy/Bilobectomy
Other (American Indian/AK Native, Asian/Pacific Islander)	Male	2004	Moderately differentiated; Grade II	IA	T1	N0	M0	None/Unknown	No/Unknown	143	Alive	67	Lobectomy/Bilobectomy
Other (American Indian/AK Native, Asian/Pacific Islander)	Male	2004	Poorly differentiated; Grade III	IA	T1	N0	M0	None/Unknown	No/Unknown	134	Alive	63	Lobectomy/Bilobectomy
Other (American Indian/AK Native, Asian/Pacific Islander)	Female	2004	Moderately differentiated; Grade II	IA	T1	N0	M0	None/Unknown	No/Unknown	51	Dead	76	Lobectomy/Bilobectomy
White	Female	2004	Moderately differentiated; Grade II	IA	T1	N0	M0	None/Unknown	No/Unknown	140	Alive	67	Lobectomy/Bilobectomy
White	Female	2004	Moderately differentiated; Grade II	IA	T1	N0	M0	None/Unknown	No/Unknown	31	Dead	82	Lobectomy/Bilobectomy
White	Male	2004	Well differentiated; Grade I	IA	T1	N0	M0	None/Unknown	No/Unknown	92	Dead	80	Lobectomy/Bilobectomy
White	Male	2004	Poorly differentiated; Grade III	IA	T1	N0	M0	None/Unknown	No/Unknown	2	Dead	81	Lobectomy/Bilobectomy
White	Female	2004	Moderately differentiated; Grade II	IA	T1	N0	M0	None/Unknown	No/Unknown	10	Dead	78	Lobectomy/Bilobectomy
White	Male	2004	Moderately differentiated; Grade II	IA	T1	N0	M0	None/Unknown	No/Unknown	16	Dead	65	Lobectomy/Bilobectomy
White	Female	2004	Well differentiated; Grade I	IA	T1	N0	M0	None/Unknown	No/Unknown	143	Alive	72	Lobectomy/Bilobectomy
White	Female	2004	Well differentiated; Grade I	IA	T1	N0	M0	None/Unknown	No/Unknown	114	Dead	72	Lobectomy/Bilobectomy
White	Male	2004	Moderately differentiated; Grade II	IA	T1	N0	M0	None/Unknown	No/Unknown	67	Dead	76	Lobectomy/Bilobectomy
White	Male	2004	Poorly differentiated; Grade III	IA	T1	N0	M0	None/Unknown	No/Unknown	143	Alive	56	Lobectomy/Bilobectomy
White	Female	2004	Well differentiated; Grade I	IA	T1	N0	M0	None/Unknown	No/Unknown	89	Dead	83	Lobectomy/Bilobectomy
White	Female	2004	Moderately differentiated; Grade II	IA	T1	N0	M0	None/Unknown	No/Unknown	143	Alive	44	Lobectomy/Bilobectomy
White	Female	2004	Poorly differentiated; Grade III	IA	T1	N0	M0	None/Unknown	No/Unknown	38	Dead	72	Lobectomy/Bilobectomy
White	Female	2004	Poorly differentiated; Grade III	IA	T1	N0	M0	None/Unknown	Yes	140	Alive	64	Lobectomy/Bilobectomy
White	Male	2004	Moderately differentiated; Grade II	IA	T1	N0	M0	None/Unknown	No/Unknown	73	Dead	64	Lobectomy/Bilobectomy
White	Male	2004	Moderately differentiated; Grade II	IA	T1	N0	M0	None/Unknown	No/Unknown	140	Alive	65	Lobectomy/Bilobectomy
White	Female	2004	Moderately differentiated; Grade II	IA	T1	N0	M0	None/Unknown	No/Unknown	32	Dead	63	Lobectomy/Bilobectomy
White	Female	2004	Well differentiated; Grade I	IA	T1	N0	M0	None/Unknown	No/Unknown	119	Dead	75	Lobectomy/Bilobectomy
White	Male	2004	Poorly differentiated; Grade III	IA	T1	N0	M0	None/Unknown	No/Unknown	60	Dead	73	Lobectomy/Bilobectomy
White	Male	2004	Moderately differentiated; Grade II	IA	T1	N0	M0	None/Unknown	No/Unknown	141	Alive	67	Lobectomy/Bilobectomy
Black	Female	2004	Moderately differentiated; Grade II	IA	T1	N0	M0	None/Unknown	No/Unknown	136	Alive	64	Lobectomy/Bilobectomy
White	Female	2004	Moderately differentiated; Grade II	IA	T1	N0	M0	None/Unknown	No/Unknown	46	Dead	77	Lobectomy/Bilobectomy
White	Female	2004	Moderately differentiated; Grade II	IA	T1	N0	M0	None/Unknown	No/Unknown	135	Alive	65	Lobectomy/Bilobectomy
White	Male	2004	Poorly differentiated; Grade III	IA	T1	N0	M0	None/Unknown	No/Unknown	135	Alive	60	Lobectomy/Bilobectomy
White	Female	2004	Moderately differentiated; Grade II	IA	T1	N0	M0	None/Unknown	No/Unknown	116	Dead	80	Lobectomy/Bilobectomy
White	Male	2004	Poorly differentiated; Grade III	IA	T1	N0	M0	None/Unknown	No/Unknown	16	Dead	59	Lobectomy/Bilobectomy
White	Male	2004	Poorly differentiated; Grade III	IA	T1	N0	M0	None/Unknown	No/Unknown	137	Alive	64	Lobectomy/Bilobectomy
White	Female	2004	Moderately differentiated; Grade II	IA	T1	N0	M0	None/Unknown	No/Unknown	132	Alive	75	Lobectomy/Bilobectomy
White	Female	2004	Moderately differentiated; Grade II	IA	T1	N0	M0	None/Unknown	No/Unknown	100	Dead	68	Lobectomy/Bilobectomy
White	Female	2004	Moderately differentiated; Grade II	IA	T1	N0	M0	None/Unknown	No/Unknown	137	Alive	75	Lobectomy/Bilobectomy
White	Female	2004	Well differentiated; Grade I	IA	T1	N0	M0	None/Unknown	No/Unknown	103	Dead	70	Lobectomy/Bilobectomy
White	Male	2004	Undifferentiated; anaplastic; Grade IV	IA	T1	N0	M0	None/Unknown	No/Unknown	140	Alive	64	Lobectomy/Bilobectomy
White	Female	2004	Moderately differentiated; Grade II	IA	T1	N0	M0	None/Unknown	No/Unknown	132	Alive	63	Lobectomy/Bilobectomy
White	Female	2004	Moderately differentiated; Grade II	IA	T1	N0	M0	None/Unknown	No/Unknown	142	Alive	57	Lobectomy/Bilobectomy
White	Female	2004	Moderately differentiated; Grade II	IA	T1	N0	M0	None/Unknown	No/Unknown	136	Alive	77	Lobectomy/Bilobectomy
White	Female	2004	Poorly differentiated; Grade III	IA	T1	N0	M0	None/Unknown	No/Unknown	51	Dead	71	Lobectomy/Bilobectomy
White	Female	2004	Moderately differentiated; Grade II	IA	T1	N0	M0	None/Unknown	No/Unknown	132	Alive	62	Lobectomy/Bilobectomy
White	Female	2004	Unknown	IA	T1	N0	M0	None/Unknown	No/Unknown	113	Dead	55	Lobectomy/Bilobectomy
White	Male	2004	Well differentiated; Grade I	IA	T1	N0	M0	None/Unknown	No/Unknown	136	Alive	52	Lobectomy/Bilobectomy
White	Male	2004	Moderately differentiated; Grade II	IA	T1	N0	M0	None/Unknown	No/Unknown	134	Alive	60	Lobectomy/Bilobectomy
White	Female	2004	Moderately differentiated; Grade II	IA	T1	N0	M0	None/Unknown	No/Unknown	134	Dead	45	Lobectomy/Bilobectomy
White	Female	2004	Poorly differentiated; Grade III	IA	T1	N0	M0	None/Unknown	No/Unknown	139	Alive	79	Lobectomy/Bilobectomy
Other (American Indian/AK Native, Asian/Pacific Islander)	Female	2004	Poorly differentiated; Grade III	IA	T1	N0	M0	None/Unknown	No/Unknown	139	Alive	79	Lobectomy/Bilobectomy
White	Male	2004	Poorly differentiated; Grade III	IA	T1	N0	M0	None/Unknown	No/Unknown	127	Dead	54	Lobectomy/Bilobectomy
White	Female	2004	Poorly differentiated; Grade III	IA	T1	N0	M0	None/Unknown	No/Unknown	115	Dead	82	Lobectomy/Bilobectomy
White	Male	2004	Poorly differentiated; Grade III	IA	T1	N0	M0	None/Unknown	No/Unknown	20	Dead	75	Lobectomy/Bilobectomy
Black	Female	2004	Well differentiated; Grade I	IA	T1	N0	M0	None/Unknown	No/Unknown	126	Dead	61	Lobectomy/Bilobectomy
White	Male	2004	Moderately differentiated; Grade II	IA	T1	N0	M0	None/Unknown	No/Unknown	49	Dead	75	Lobectomy/Bilobectomy
White	Female	2004	Moderately differentiated; Grade II	IA	T1	N0	M0	None/Unknown	No/Unknown	135	Alive	63	Lobectomy/Bilobectomy
White	Male	2004	Undifferentiated; anaplastic; Grade IV	IA	T1	N0	M0	None/Unknown	No/Unknown	54	Dead	67	Lobectomy/Bilobectomy
White	Male	2004	Poorly differentiated; Grade III	IA	T1	N0	M0	None/Unknown	No/Unknown	57	Dead	73	Lobectomy/Bilobectomy
White	Female	2004	Well differentiated; Grade I	IA	T1	N0	M0	None/Unknown	Yes	53	Dead	65	Lobectomy/Bilobectomy
White	Male	2004	Moderately differentiated; Grade II	IA	T1	N0	M0	None/Unknown	No/Unknown	94	Dead	66	Lobectomy/Bilobectomy
White	Male	2004	Well differentiated; Grade I	IA	T1	N0	M0	None/Unknown	No/Unknown	27	Dead	76	Lobectomy/Bilobectomy
White	Male	2004	Moderately differentiated; Grade II	IA	T1	N0	M0	None/Unknown	No/Unknown	135	Alive	64	Lobectomy/Bilobectomy
White	Male	2004	Poorly differentiated; Grade III	IA	T1	N0	M0	None/Unknown	No/Unknown	81	Dead	76	Lobectomy/Bilobectomy
White	Male	2004	Well differentiated; Grade I	IA	T1	N0	M0	None/Unknown	No/Unknown	140	Alive	55	Lobectomy/Bilobectomy
White	Female	2004	Moderately differentiated; Grade II	IA	T1	N0	M0	None/Unknown	No/Unknown	140	Alive	59	Lobectomy/Bilobectomy
White	Female	2004	Moderately differentiated; Grade II	IA	T1	N0	M0	None/Unknown	No/Unknown	27	Dead	63	Lobectomy/Bilobectomy
White	Female	2004	Poorly differentiated; Grade III	IA	T1	N0	M0	None/Unknown	No/Unknown	4	Dead	37	Lobectomy/Bilobectomy
White	Male	2004	Poorly differentiated; Grade III	IA	T1	N0	M0	None/Unknown	No/Unknown	46	Dead	70	Lobectomy/Bilobectomy
White	Female	2004	Moderately differentiated; Grade II	IA	T1	N0	M0	None/Unknown	No/Unknown	14	Dead	62	Lobectomy/Bilobectomy
White	Male	2004	Moderately differentiated; Grade II	IA	T1	N0	M0	None/Unknown	No/Unknown	143	Alive	64	Lobectomy/Bilobectomy
White	Female	2004	Moderately differentiated; Grade II	IA	T1	N0	M0	None/Unknown	No/Unknown	80	Dead	82	Lobectomy/Bilobectomy
White	Male	2004	Moderately differentiated; Grade II	IA	T1	N0	M0	None/Unknown	No/Unknown	138	Alive	69	Lobectomy/Bilobectomy
White	Male	2004	Moderately differentiated; Grade II	IA	T1	N0	M0	None/Unknown	No/Unknown	41	Dead	64	Lobectomy/Bilobectomy
White	Male	2004	Poorly differentiated; Grade III	IA	T1	N0	M0	None/Unknown	No/Unknown	141	Alive	73	Lobectomy/Bilobectomy
White	Female	2004	Poorly differentiated; Grade III	IA	T1	N0	M0	None/Unknown	No/Unknown	75	Dead	76	Lobectomy/Bilobectomy
White	Female	2004	Well differentiated; Grade I	IA	T1	N0	M0	None/Unknown	No/Unknown	141	Alive	61	Lobectomy/Bilobectomy
Black	Male	2004	Moderately differentiated; Grade II	IA	T1	N0	M0	None/Unknown	No/Unknown	50	Dead	62	Lobectomy/Bilobectomy
White	Female	2004	Moderately differentiated; Grade II	IA	T1	N0	M0	None/Unknown	No/Unknown	134	Dead	64	Lobectomy/Bilobectomy
White	Female	2004	Moderately differentiated; Grade II	IA	T1	N0	M0	None/Unknown	No/Unknown	126	Dead	64	Lobectomy/Bilobectomy
White	Female	2004	Poorly differentiated; Grade III	IA	T1	N0	M0	None/Unknown	No/Unknown	107	Dead	79	Lobectomy/Bilobectomy
White	Female	2004	Moderately differentiated; Grade II	IA	T1	N0	M0	None/Unknown	No/Unknown	112	Dead	72	Lobectomy/Bilobectomy
White	Female	2004	Poorly differentiated; Grade III	IA	T1	N0	M0	None/Unknown	No/Unknown	108	Dead	92	Lobectomy/Bilobectomy
White	Female	2004	Well differentiated; Grade I	IA	T1	N0	M0	Beam radiation	Yes	141	Alive	69	Lobectomy/Bilobectomy
White	Male	2004	Moderately differentiated; Grade II	IA	T1	N0	M0	None/Unknown	No/Unknown	116	Dead	75	Lobectomy/Bilobectomy
White	Female	2004	Moderately differentiated; Grade II	IA	T1	N0	M0	None/Unknown	No/Unknown	104	Dead	68	Lobectomy/Bilobectomy
White	Female	2004	Well differentiated; Grade I	IA	T1	N0	M0	None/Unknown	No/Unknown	139	Alive	56	Lobectomy/Bilobectomy
White	Female	2004	Poorly differentiated; Grade III	IA	T1	N0	M0	None/Unknown	No/Unknown	141	Alive	42	Lobectomy/Bilobectomy
White	Male	2004	Moderately differentiated; Grade II	IA	T1	N0	M0	None/Unknown	No/Unknown	137	Alive	64	Lobectomy/Bilobectomy
White	Male	2004	Poorly differentiated; Grade III	IA	T1	N0	M0	None/Unknown	No/Unknown	4	Dead	85	Lobectomy/Bilobectomy
White	Female	2004	Moderately differentiated; Grade II	IA	T1	N0	M0	None/Unknown	No/Unknown	143	Alive	56	Lobectomy/Bilobectomy
White	Female	2004	Moderately differentiated; Grade II	IA	T1	N0	M0	None/Unknown	No/Unknown	137	Alive	61	Lobectomy/Bilobectomy
White	Female	2004	Moderately differentiated; Grade II	IA	T1	N0	M0	None/Unknown	No/Unknown	138	Alive	57	Lobectomy/Bilobectomy
White	Female	2004	Unknown	IA	T1	N0	M0	None/Unknown	No/Unknown	135	Alive	63	Lobectomy/Bilobectomy
White	Male	2004	Poorly differentiated; Grade III	IA	T1	N0	M0	None/Unknown	No/Unknown	136	Alive	61	Lobectomy/Bilobectomy
White	Female	2004	Moderately differentiated; Grade II	IA	T1	N0	M0	None/Unknown	No/Unknown	135	Alive	68	Lobectomy/Bilobectomy
White	Female	2004	Moderately differentiated; Grade II	IA	T1	N0	M0	None/Unknown	No/Unknown	75	Dead	72	Lobectomy/Bilobectomy
White	Male	2004	Poorly differentiated; Grade III	IA	T1	N0	M0	None/Unknown	No/Unknown	135	Alive	53	Lobectomy/Bilobectomy
White	Male	2004	Moderately differentiated; Grade II	IA	T1	N0	M0	None/Unknown	No/Unknown	136	Alive	57	Lobectomy/Bilobectomy
White	Female	2004	Poorly differentiated; Grade III	IA	T1	N0	M0	None/Unknown	No/Unknown	135	Alive	57	Lobectomy/Bilobectomy
White	Male	2004	Poorly differentiated; Grade III	IA	T1	N0	M0	None/Unknown	No/Unknown	137	Alive	54	Lobectomy/Bilobectomy
White	Female	2004	Moderately differentiated; Grade II	IA	T1	N0	M0	None/Unknown	No/Unknown	88	Dead	66	Lobectomy/Bilobectomy
White	Male	2004	Well differentiated; Grade I	IA	T1	N0	M0	None/Unknown	No/Unknown	25	Dead	58	Lobectomy/Bilobectomy
White	Female	2004	Poorly differentiated; Grade III	IA	T1	N0	M0	None/Unknown	No/Unknown	96	Dead	61	Lobectomy/Bilobectomy
White	Female	2004	Moderately differentiated; Grade II	IA	T1	N0	M0	None/Unknown	No/Unknown	132	Alive	55	Lobectomy/Bilobectomy
White	Male	2004	Well differentiated; Grade I	IA	T1	N0	M0	None/Unknown	No/Unknown	28	Dead	69	Lobectomy/Bilobectomy
White	Female	2004	Moderately differentiated; Grade II	IA	T1	N0	M0	None/Unknown	No/Unknown	132	Alive	71	Lobectomy/Bilobectomy
White	Female	2004	Poorly differentiated; Grade III	IA	T1	N0	M0	None/Unknown	No/Unknown	132	Alive	53	Lobectomy/Bilobectomy
White	Female	2004	Moderately differentiated; Grade II	IA	T1	N0	M0	None/Unknown	No/Unknown	132	Alive	69	Lobectomy/Bilobectomy
White	Female	2004	Unknown	IA	T1	N0	M0	None/Unknown	No/Unknown	50	Dead	54	Lobectomy/Bilobectomy
White	Male	2004	Moderately differentiated; Grade II	IA	T1	N0	M0	None/Unknown	No/Unknown	118	Dead	57	Lobectomy/Bilobectomy
Other (American Indian/AK Native, Asian/Pacific Islander)	Male	2004	Poorly differentiated; Grade III	IA	T1	N0	M0	None/Unknown	No/Unknown	134	Alive	57	Lobectomy/Bilobectomy
White	Female	2004	Moderately differentiated; Grade II	IA	T1	N0	M0	None/Unknown	No/Unknown	132	Alive	71	Lobectomy/Bilobectomy
White	Male	2004	Moderately differentiated; Grade II	IA	T1	N0	M0	None/Unknown	No/Unknown	140	Alive	57	Lobectomy/Bilobectomy
White	Female	2004	Well differentiated; Grade I	IA	T1	N0	M0	None/Unknown	No/Unknown	140	Alive	73	Lobectomy/Bilobectomy
White	Female	2004	Moderately differentiated; Grade II	IA	T1	N0	M0	None/Unknown	No/Unknown	78	Dead	76	Lobectomy/Bilobectomy
White	Male	2004	Unknown	IA	T1	N0	M0	None/Unknown	No/Unknown	140	Alive	70	Lobectomy/Bilobectomy
White	Female	2004	Moderately differentiated; Grade II	IA	T1	N0	M0	None/Unknown	No/Unknown	135	Alive	76	Lobectomy/Bilobectomy
White	Female	2004	Moderately differentiated; Grade II	IA	T1	N0	M0	None/Unknown	No/Unknown	74	Dead	61	Lobectomy/Bilobectomy
White	Male	2004	Well differentiated; Grade I	IA	T1	N0	M0	None/Unknown	No/Unknown	95	Alive	78	Lobectomy/Bilobectomy
White	Male	2004	Moderately differentiated; Grade II	IA	T1	N0	M0	None/Unknown	No/Unknown	132	Alive	59	Lobectomy/Bilobectomy
White	Male	2004	Well differentiated; Grade I	IA	T1	N0	M0	None/Unknown	No/Unknown	143	Alive	67	Lobectomy/Bilobectomy
White	Male	2004	Moderately differentiated; Grade II	IA	T1	N0	M0	None/Unknown	No/Unknown	142	Alive	64	Lobectomy/Bilobectomy
White	Male	2004	Moderately differentiated; Grade II	IA	T1	N0	M0	None/Unknown	No/Unknown	137	Alive	66	Lobectomy/Bilobectomy
Black	Female	2004	Moderately differentiated; Grade II	IA	T1	N0	M0	None/Unknown	No/Unknown	22	Dead	73	Lobectomy/Bilobectomy
White	Female	2004	Poorly differentiated; Grade III	IA	T1	N0	M0	None/Unknown	No/Unknown	139	Dead	72	Lobectomy/Bilobectomy
White	Male	2004	Poorly differentiated; Grade III	IA	T1	N0	M0	None/Unknown	No/Unknown	49	Dead	64	Lobectomy/Bilobectomy
Black	Male	2004	Well differentiated; Grade I	IA	T1	N0	M0	None/Unknown	No/Unknown	134	Alive	52	Lobectomy/Bilobectomy
White	Female	2004	Poorly differentiated; Grade III	IA	T1	N0	M0	None/Unknown	No/Unknown	9	Dead	78	Lobectomy/Bilobectomy
White	Female	2004	Poorly differentiated; Grade III	IA	T1	N0	M0	None/Unknown	No/Unknown	24	Dead	45	Lobectomy/Bilobectomy
Black	Female	2004	Moderately differentiated; Grade II	IA	T1	N0	M0	None/Unknown	No/Unknown	136	Alive	51	Lobectomy/Bilobectomy
Black	Male	2004	Moderately differentiated; Grade II	IA	T1	N0	M0	None/Unknown	No/Unknown	39	Dead	69	Lobectomy/Bilobectomy
White	Female	2004	Moderately differentiated; Grade II	IA	T1	N0	M0	None/Unknown	No/Unknown	123	Dead	65	Lobectomy/Bilobectomy
White	Male	2004	Moderately differentiated; Grade II	IA	T1	N0	M0	None/Unknown	No/Unknown	133	Alive	56	Lobectomy/Bilobectomy
White	Male	2004	Moderately differentiated; Grade II	IA	T1	N0	M0	None/Unknown	No/Unknown	85	Dead	76	Lobectomy/Bilobectomy
White	Female	2004	Moderately differentiated; Grade II	IA	T1	N0	M0	None/Unknown	Yes	62	Dead	69	Lobectomy/Bilobectomy
White	Female	2004	Moderately differentiated; Grade II	IA	T1	N0	M0	None/Unknown	No/Unknown	133	Alive	52	Lobectomy/Bilobectomy
White	Female	2004	Moderately differentiated; Grade II	IA	T1	N0	M0	Beam radiation	No/Unknown	18	Dead	75	Lobectomy/Bilobectomy
White	Female	2004	Moderately differentiated; Grade II	IA	T1	N0	M0	None/Unknown	No/Unknown	138	Alive	77	Lobectomy/Bilobectomy
White	Female	2004	Moderately differentiated; Grade II	IA	T1	N0	M0	None/Unknown	No/Unknown	135	Alive	80	Lobectomy/Bilobectomy
White	Male	2004	Poorly differentiated; Grade III	IA	T1	N0	M0	None/Unknown	No/Unknown	1	Dead	76	Lobectomy/Bilobectomy
Other (American Indian/AK Native, Asian/Pacific Islander)	Female	2004	Moderately differentiated; Grade II	IA	T1	N0	M0	None/Unknown	No/Unknown	78	Dead	79	Lobectomy/Bilobectomy
White	Male	2004	Well differentiated; Grade I	IA	T1	N0	M0	None/Unknown	No/Unknown	96	Dead	65	Lobectomy/Bilobectomy
White	Female	2004	Moderately differentiated; Grade II	IA	T1	N0	M0	None/Unknown	No/Unknown	133	Alive	81	Lobectomy/Bilobectomy
Other (American Indian/AK Native, Asian/Pacific Islander)	Male	2004	Moderately differentiated; Grade II	IA	T1	N0	M0	None/Unknown	No/Unknown	56	Dead	51	Lobectomy/Bilobectomy
White	Female	2004	Moderately differentiated; Grade II	IA	T1	N0	M0	None/Unknown	No/Unknown	138	Alive	59	Lobectomy/Bilobectomy
Other (American Indian/AK Native, Asian/Pacific Islander)	Female	2004	Moderately differentiated; Grade II	IA	T1	N0	M0	None/Unknown	No/Unknown	132	Dead	74	Lobectomy/Bilobectomy
White	Female	2004	Moderately differentiated; Grade II	IA	T1	N0	M0	None/Unknown	Yes	21	Dead	76	Lobectomy/Bilobectomy
White	Female	2004	Moderately differentiated; Grade II	IA	T1	N0	M0	None/Unknown	No/Unknown	51	Dead	76	Lobectomy/Bilobectomy
White	Male	2004	Moderately differentiated; Grade II	IA	T1	N0	M0	None/Unknown	No/Unknown	110	Dead	63	Lobectomy/Bilobectomy
White	Female	2004	Moderately differentiated; Grade II	IA	T1	N0	M0	None/Unknown	No/Unknown	9	Dead	81	Lobectomy/Bilobectomy
White	Female	2004	Poorly differentiated; Grade III	IA	T1	N0	M0	None/Unknown	No/Unknown	94	Dead	79	Lobectomy/Bilobectomy
White	Male	2004	Moderately differentiated; Grade II	IA	T1	N0	M0	None/Unknown	No/Unknown	59	Dead	66	Lobectomy/Bilobectomy
White	Male	2004	Moderately differentiated; Grade II	IA	T1	N0	M0	None/Unknown	No/Unknown	134	Alive	60	Lobectomy/Bilobectomy
White	Male	2004	Moderately differentiated; Grade II	IA	T1	N0	M0	None/Unknown	No/Unknown	133	Alive	75	Lobectomy/Bilobectomy
White	Female	2004	Moderately differentiated; Grade II	IA	T1	N0	M0	None/Unknown	No/Unknown	74	Dead	65	Lobectomy/Bilobectomy
White	Female	2004	Poorly differentiated; Grade III	IA	T1	N0	M0	None/Unknown	No/Unknown	102	Dead	67	Lobectomy/Bilobectomy
White	Female	2004	Poorly differentiated; Grade III	IA	T1	N0	M0	None/Unknown	No/Unknown	58	Dead	67	Lobectomy/Bilobectomy
Other (American Indian/AK Native, Asian/Pacific Islander)	Female	2004	Poorly differentiated; Grade III	IA	T1	N0	M0	None/Unknown	No/Unknown	54	Dead	85	Lobectomy/Bilobectomy
White	Female	2004	Poorly differentiated; Grade III	IA	T1	N0	M0	None/Unknown	No/Unknown	6	Dead	69	Lobectomy/Bilobectomy
White	Male	2004	Well differentiated; Grade I	IA	T1	N0	M0	None/Unknown	No/Unknown	132	Alive	73	Lobectomy/Bilobectomy
White	Female	2004	Poorly differentiated; Grade III	IA	T1	N0	M0	None/Unknown	No/Unknown	83	Dead	63	Lobectomy/Bilobectomy
White	Male	2004	Moderately differentiated; Grade II	IA	T1	N0	M0	None/Unknown	No/Unknown	134	Alive	72	Lobectomy/Bilobectomy
White	Male	2004	Well differentiated; Grade I	IA	T1	N0	M0	None/Unknown	No/Unknown	86	Dead	84	Lobectomy/Bilobectomy
White	Male	2004	Moderately differentiated; Grade II	IA	T1	N0	M0	None/Unknown	No/Unknown	132	Alive	66	Lobectomy/Bilobectomy
White	Male	2004	Moderately differentiated; Grade II	IA	T1	N0	M0	None/Unknown	No/Unknown	135	Alive	79	Lobectomy/Bilobectomy
Other (American Indian/AK Native, Asian/Pacific Islander)	Male	2004	Poorly differentiated; Grade III	IA	T1	N0	M0	None/Unknown	Yes	40	Dead	74	Lobectomy/Bilobectomy
White	Female	2004	Poorly differentiated; Grade III	IA	T1	N0	M0	None/Unknown	No/Unknown	80	Dead	70	Lobectomy/Bilobectomy
White	Female	2004	Well differentiated; Grade I	IA	T1	N0	M0	None/Unknown	No/Unknown	0	Dead	77	Lobectomy/Bilobectomy
Black	Female	2004	Poorly differentiated; Grade III	IA	T1	N0	M0	None/Unknown	No/Unknown	134	Alive	65	Lobectomy/Bilobectomy
Other (American Indian/AK Native, Asian/Pacific Islander)	Female	2004	Well differentiated; Grade I	IA	T1	N0	M0	None/Unknown	No/Unknown	134	Alive	80	Lobectomy/Bilobectomy
Black	Female	2004	Moderately differentiated; Grade II	IA	T1	N0	M0	None/Unknown	No/Unknown	132	Alive	66	Lobectomy/Bilobectomy
Other (American Indian/AK Native, Asian/Pacific Islander)	Male	2004	Poorly differentiated; Grade III	IA	T1	N0	M0	None/Unknown	No/Unknown	64	Dead	87	Lobectomy/Bilobectomy
Other (American Indian/AK Native, Asian/Pacific Islander)	Female	2004	Poorly differentiated; Grade III	IA	T1	N0	M0	None/Unknown	No/Unknown	139	Alive	50	Lobectomy/Bilobectomy
White	Female	2004	Moderately differentiated; Grade II	IA	T1	N0	M0	None/Unknown	No/Unknown	32	Dead	71	Lobectomy/Bilobectomy
White	Female	2004	Moderately differentiated; Grade II	IA	T1	N0	M0	None/Unknown	Yes	31	Dead	78	Lobectomy/Bilobectomy
White	Female	2004	Moderately differentiated; Grade II	IA	T1	N0	M0	None/Unknown	No/Unknown	140	Alive	56	Lobectomy/Bilobectomy
White	Male	2004	Moderately differentiated; Grade II	IA	T1	N0	M0	None/Unknown	No/Unknown	51	Dead	75	Lobectomy/Bilobectomy
White	Female	2004	Moderately differentiated; Grade II	IA	T1	N0	M0	None/Unknown	No/Unknown	111	Alive	79	Lobectomy/Bilobectomy
White	Male	2004	Moderately differentiated; Grade II	IA	T1	N0	M0	None/Unknown	No/Unknown	136	Alive	74	Lobectomy/Bilobectomy
White	Female	2004	Poorly differentiated; Grade III	IA	T1	N0	M0	None/Unknown	No/Unknown	21	Dead	55	Lobectomy/Bilobectomy
White	Female	2004	Well differentiated; Grade I	IA	T1	N0	M0	None/Unknown	No/Unknown	96	Dead	72	Lobectomy/Bilobectomy
White	Female	2004	Poorly differentiated; Grade III	IA	T1	N0	M0	None/Unknown	No/Unknown	140	Alive	58	Lobectomy/Bilobectomy
White	Female	2004	Poorly differentiated; Grade III	IA	T1	N0	M0	None/Unknown	No/Unknown	99	Dead	77	Lobectomy/Bilobectomy
White	Male	2004	Poorly differentiated; Grade III	IA	T1	N0	M0	None/Unknown	No/Unknown	77	Dead	79	Lobectomy/Bilobectomy
White	Female	2004	Moderately differentiated; Grade II	IA	T1	N0	M0	None/Unknown	No/Unknown	1	Dead	82	Lobectomy/Bilobectomy
White	Female	2004	Poorly differentiated; Grade III	IA	T1	N0	M0	None/Unknown	No/Unknown	126	Dead	56	Lobectomy/Bilobectomy
White	Male	2004	Poorly differentiated; Grade III	IA	T1	N0	M0	None/Unknown	No/Unknown	139	Alive	60	Lobectomy/Bilobectomy
Other (American Indian/AK Native, Asian/Pacific Islander)	Female	2004	Poorly differentiated; Grade III	IA	T1	N0	M0	None/Unknown	No/Unknown	82	Alive	48	Lobectomy/Bilobectomy
White	Male	2004	Moderately differentiated; Grade II	IA	T1	N0	M0	None/Unknown	No/Unknown	83	Dead	68	Lobectomy/Bilobectomy
Other (American Indian/AK Native, Asian/Pacific Islander)	Male	2004	Well differentiated; Grade I	IA	T1	N0	M0	None/Unknown	No/Unknown	128	Alive	73	Lobectomy/Bilobectomy
White	Male	2004	Poorly differentiated; Grade III	IA	T1	N0	M0	None/Unknown	No/Unknown	18	Dead	73	Lobectomy/Bilobectomy
Other (American Indian/AK Native, Asian/Pacific Islander)	Male	2004	Poorly differentiated; Grade III	IA	T1	N0	M0	None/Unknown	Yes	141	Alive	57	Lobectomy/Bilobectomy
Other (American Indian/AK Native, Asian/Pacific Islander)	Male	2004	Moderately differentiated; Grade II	IA	T1	N0	M0	None/Unknown	No/Unknown	134	Alive	58	Lobectomy/Bilobectomy
White	Male	2004	Moderately differentiated; Grade II	IA	T1	N0	M0	None/Unknown	No/Unknown	139	Alive	62	Lobectomy/Bilobectomy
White	Female	2004	Poorly differentiated; Grade III	IA	T1	N0	M0	None/Unknown	No/Unknown	100	Dead	63	Lobectomy/Bilobectomy
White	Male	2004	Moderately differentiated; Grade II	IA	T1	N0	M0	None/Unknown	No/Unknown	140	Alive	49	Lobectomy/Bilobectomy
White	Female	2004	Moderately differentiated; Grade II	IA	T1	N0	M0	None/Unknown	No/Unknown	95	Alive	57	Lobectomy/Bilobectomy
White	Male	2004	Moderately differentiated; Grade II	IA	T1	N0	M0	None/Unknown	No/Unknown	128	Alive	67	Lobectomy/Bilobectomy
White	Male	2004	Moderately differentiated; Grade II	IA	T1	N0	M0	None/Unknown	No/Unknown	140	Alive	68	Lobectomy/Bilobectomy
Black	Female	2004	Poorly differentiated; Grade III	IA	T1	N0	M0	None/Unknown	No/Unknown	32	Dead	55	Lobectomy/Bilobectomy
White	Female	2004	Moderately differentiated; Grade II	IA	T1	N0	M0	None/Unknown	No/Unknown	34	Dead	73	Lobectomy/Bilobectomy
White	Female	2004	Undifferentiated; anaplastic; Grade IV	IA	T1	N0	M0	None/Unknown	No/Unknown	137	Alive	78	Lobectomy/Bilobectomy
White	Female	2004	Well differentiated; Grade I	IA	T1	N0	M0	None/Unknown	No/Unknown	99	Dead	63	Lobectomy/Bilobectomy
Other (American Indian/AK Native, Asian/Pacific Islander)	Male	2004	Moderately differentiated; Grade II	IA	T1	N0	M0	None/Unknown	No/Unknown	136	Alive	67	Lobectomy/Bilobectomy
White	Female	2004	Moderately differentiated; Grade II	IA	T1	N0	M0	None/Unknown	No/Unknown	125	Alive	58	Lobectomy/Bilobectomy
White	Female	2004	Poorly differentiated; Grade III	IA	T1	N0	M0	None/Unknown	No/Unknown	65	Dead	77	Lobectomy/Bilobectomy
Other (American Indian/AK Native, Asian/Pacific Islander)	Male	2004	Poorly differentiated; Grade III	IA	T1	N0	M0	None/Unknown	No/Unknown	135	Alive	66	Lobectomy/Bilobectomy
White	Male	2004	Poorly differentiated; Grade III	IA	T1	N0	M0	None/Unknown	No/Unknown	30	Dead	71	Lobectomy/Bilobectomy
White	Male	2004	Moderately differentiated; Grade II	IA	T1	N0	M0	None/Unknown	No/Unknown	17	Dead	76	Lobectomy/Bilobectomy
White	Male	2004	Poorly differentiated; Grade III	IA	T1	N0	M0	None/Unknown	No/Unknown	2	Dead	61	Lobectomy/Bilobectomy
White	Female	2004	Moderately differentiated; Grade II	IA	T1	N0	M0	None/Unknown	No/Unknown	23	Dead	46	Lobectomy/Bilobectomy
White	Female	2004	Moderately differentiated; Grade II	IA	T1	N0	M0	None/Unknown	No/Unknown	24	Dead	76	Lobectomy/Bilobectomy
White	Male	2004	Moderately differentiated; Grade II	IA	T1	N0	M0	None/Unknown	No/Unknown	135	Dead	71	Lobectomy/Bilobectomy
White	Male	2004	Moderately differentiated; Grade II	IA	T1	N0	M0	None/Unknown	No/Unknown	43	Dead	75	Lobectomy/Bilobectomy
Other (American Indian/AK Native, Asian/Pacific Islander)	Male	2004	Poorly differentiated; Grade III	IA	T1	N0	M0	None/Unknown	No/Unknown	1	Dead	82	Lobectomy/Bilobectomy
Other (American Indian/AK Native, Asian/Pacific Islander)	Female	2004	Poorly differentiated; Grade III	IA	T1	N0	M0	None/Unknown	No/Unknown	96	Dead	70	Lobectomy/Bilobectomy
White	Female	2004	Moderately differentiated; Grade II	IA	T1	N0	M0	None/Unknown	No/Unknown	2	Dead	75	Lobectomy/Bilobectomy
White	Male	2004	Moderately differentiated; Grade II	IA	T1	N0	M0	None/Unknown	No/Unknown	27	Dead	83	Lobectomy/Bilobectomy
Black	Female	2004	Well differentiated; Grade I	IA	T1	N0	M0	None/Unknown	No/Unknown	133	Alive	68	Lobectomy/Bilobectomy
Other (American Indian/AK Native, Asian/Pacific Islander)	Female	2004	Poorly differentiated; Grade III	IA	T1	N0	M0	None/Unknown	No/Unknown	136	Alive	68	Lobectomy/Bilobectomy
White	Male	2004	Moderately differentiated; Grade II	IA	T1	N0	M0	None/Unknown	No/Unknown	4	Dead	65	Lobectomy/Bilobectomy
White	Female	2004	Undifferentiated; anaplastic; Grade IV	IA	T1	N0	M0	None/Unknown	No/Unknown	122	Alive	66	Lobectomy/Bilobectomy
White	Male	2004	Moderately differentiated; Grade II	IA	T1	N0	M0	None/Unknown	No/Unknown	25	Dead	59	Lobectomy/Bilobectomy
Black	Female	2004	Moderately differentiated; Grade II	IA	T1	N0	M0	None/Unknown	Yes	14	Dead	56	Lobectomy/Bilobectomy
White	Female	2004	Well differentiated; Grade I	IA	T1	N0	M0	None/Unknown	No/Unknown	132	Alive	82	Lobectomy/Bilobectomy
White	Female	2004	Poorly differentiated; Grade III	IA	T1	N0	M0	None/Unknown	No/Unknown	89	Dead	54	Lobectomy/Bilobectomy
Other (American Indian/AK Native, Asian/Pacific Islander)	Female	2004	Moderately differentiated; Grade II	IA	T1	N0	M0	None/Unknown	No/Unknown	141	Alive	64	Lobectomy/Bilobectomy
Other (American Indian/AK Native, Asian/Pacific Islander)	Male	2004	Poorly differentiated; Grade III	IA	T1	N0	M0	None/Unknown	No/Unknown	11	Dead	62	Lobectomy/Bilobectomy
Black	Male	2004	Poorly differentiated; Grade III	IA	T1	N0	M0	None/Unknown	No/Unknown	34	Dead	58	Lobectomy/Bilobectomy
White	Male	2004	Moderately differentiated; Grade II	IA	T1	N0	M0	None/Unknown	No/Unknown	68	Dead	78	Lobectomy/Bilobectomy
White	Male	2004	Moderately differentiated; Grade II	IA	T1	N0	M0	None/Unknown	No/Unknown	62	Dead	73	Lobectomy/Bilobectomy
White	Male	2004	Poorly differentiated; Grade III	IA	T1	N0	M0	None/Unknown	No/Unknown	66	Dead	77	Lobectomy/Bilobectomy
White	Male	2004	Poorly differentiated; Grade III	IA	T1	N0	M0	None/Unknown	No/Unknown	84	Dead	75	Lobectomy/Bilobectomy
White	Male	2004	Moderately differentiated; Grade II	IA	T1	N0	M0	None/Unknown	No/Unknown	19	Dead	75	Lobectomy/Bilobectomy
White	Male	2004	Well differentiated; Grade I	IA	T1	N0	M0	None/Unknown	No/Unknown	80	Dead	85	Lobectomy/Bilobectomy
White	Female	2004	Moderately differentiated; Grade II	IA	T1	N0	M0	None/Unknown	No/Unknown	7	Dead	68	Lobectomy/Bilobectomy
Other (American Indian/AK Native, Asian/Pacific Islander)	Female	2004	Moderately differentiated; Grade II	IA	T1	N0	M0	None/Unknown	No/Unknown	140	Alive	48	Lobectomy/Bilobectomy
White	Female	2004	Well differentiated; Grade I	IA	T1	N0	M0	None/Unknown	No/Unknown	87	Dead	68	Lobectomy/Bilobectomy
White	Male	2004	Poorly differentiated; Grade III	IA	T1	N0	M0	None/Unknown	Yes	79	Dead	62	Lobectomy/Bilobectomy
White	Male	2004	Moderately differentiated; Grade II	IA	T1	N0	M0	None/Unknown	No/Unknown	78	Dead	74	Lobectomy/Bilobectomy
White	Female	2004	Well differentiated; Grade I	IA	T1	N0	M0	None/Unknown	No/Unknown	39	Dead	85	Lobectomy/Bilobectomy
White	Female	2004	Moderately differentiated; Grade II	IA	T1	N0	M0	None/Unknown	No/Unknown	139	Alive	83	Lobectomy/Bilobectomy
White	Female	2004	Poorly differentiated; Grade III	IA	T1	N0	M0	None/Unknown	No/Unknown	25	Dead	65	Lobectomy/Bilobectomy
White	Female	2004	Moderately differentiated; Grade II	IA	T1	N0	M0	None/Unknown	No/Unknown	115	Alive	66	Lobectomy/Bilobectomy
White	Male	2004	Moderately differentiated; Grade II	IA	T1	N0	M0	None/Unknown	No/Unknown	19	Dead	76	Lobectomy/Bilobectomy
White	Female	2004	Moderately differentiated; Grade II	IA	T1	N0	M0	None/Unknown	No/Unknown	136	Alive	70	Lobectomy/Bilobectomy
White	Male	2004	Unknown	IA	T1	N0	M0	None/Unknown	No/Unknown	13	Dead	69	Lobectomy/Bilobectomy
White	Female	2004	Moderately differentiated; Grade II	IA	T1	N0	M0	None/Unknown	No/Unknown	40	Dead	71	Lobectomy/Bilobectomy
White	Female	2004	Moderately differentiated; Grade II	IA	T1	N0	M0	None/Unknown	No/Unknown	107	Dead	73	Lobectomy/Bilobectomy
White	Female	2004	Moderately differentiated; Grade II	IA	T1	N0	M0	None/Unknown	No/Unknown	140	Alive	67	Lobectomy/Bilobectomy
White	Female	2004	Moderately differentiated; Grade II	IA	T1	N0	M0	None/Unknown	No/Unknown	63	Dead	73	Lobectomy/Bilobectomy
White	Male	2004	Moderately differentiated; Grade II	IA	T1	N0	M0	None/Unknown	No/Unknown	7	Dead	78	Lobectomy/Bilobectomy
White	Male	2004	Poorly differentiated; Grade III	IA	T1	N0	M0	None/Unknown	No/Unknown	122	Dead	67	Lobectomy/Bilobectomy
White	Male	2004	Moderately differentiated; Grade II	IA	T1	N0	M0	None/Unknown	Yes	106	Dead	49	Lobectomy/Bilobectomy
White	Male	2004	Moderately differentiated; Grade II	IA	T1	N0	M0	None/Unknown	No/Unknown	101	Dead	65	Lobectomy/Bilobectomy
White	Female	2004	Well differentiated; Grade I	IA	T1	N0	M0	None/Unknown	No/Unknown	2	Dead	61	Lobectomy/Bilobectomy
Other (American Indian/AK Native, Asian/Pacific Islander)	Female	2004	Moderately differentiated; Grade II	IA	T1	N0	M0	None/Unknown	No/Unknown	62	Dead	73	Lobectomy/Bilobectomy
White	Female	2004	Unknown	IA	T1	N0	M0	None/Unknown	No/Unknown	121	Dead	70	Lobectomy/Bilobectomy
White	Male	2004	Poorly differentiated; Grade III	IA	T1	N0	M0	Beam radiation	Yes	113	Dead	75	Lobectomy/Bilobectomy
White	Male	2004	Moderately differentiated; Grade II	IA	T1	N0	M0	None/Unknown	No/Unknown	80	Dead	77	Lobectomy/Bilobectomy
White	Female	2004	Moderately differentiated; Grade II	IA	T1	N0	M0	None/Unknown	No/Unknown	3	Dead	85	Lobectomy/Bilobectomy
White	Female	2004	Poorly differentiated; Grade III	IA	T1	N0	M0	None/Unknown	No/Unknown	127	Alive	50	Lobectomy/Bilobectomy
White	Female	2004	Well differentiated; Grade I	IA	T1	N0	M0	None/Unknown	No/Unknown	138	Alive	69	Lobectomy/Bilobectomy
White	Female	2004	Poorly differentiated; Grade III	IA	T1	N0	M0	None/Unknown	No/Unknown	53	Dead	56	Lobectomy/Bilobectomy
White	Female	2004	Moderately differentiated; Grade II	IA	T1	N0	M0	None/Unknown	No/Unknown	102	Dead	64	Lobectomy/Bilobectomy
White	Male	2004	Moderately differentiated; Grade II	IA	T1	N0	M0	None/Unknown	No/Unknown	31	Dead	80	Lobectomy/Bilobectomy
White	Female	2004	Moderately differentiated; Grade II	IA	T1	N0	M0	None/Unknown	No/Unknown	135	Alive	52	Lobectomy/Bilobectomy
White	Male	2004	Poorly differentiated; Grade III	IA	T1	N0	M0	None/Unknown	No/Unknown	50	Dead	71	Lobectomy/Bilobectomy
White	Female	2004	Moderately differentiated; Grade II	IA	T1	N0	M0	None/Unknown	No/Unknown	72	Dead	84	Lobectomy/Bilobectomy
White	Female	2004	Poorly differentiated; Grade III	IA	T1	N0	M0	None/Unknown	No/Unknown	64	Dead	81	Lobectomy/Bilobectomy
White	Female	2004	Poorly differentiated; Grade III	IA	T1	N0	M0	None/Unknown	No/Unknown	74	Dead	67	Lobectomy/Bilobectomy
White	Male	2004	Moderately differentiated; Grade II	IA	T1	N0	M0	None/Unknown	No/Unknown	138	Alive	41	Lobectomy/Bilobectomy
White	Female	2004	Poorly differentiated; Grade III	IA	T1	N0	M0	None/Unknown	No/Unknown	137	Alive	69	Lobectomy/Bilobectomy
White	Female	2004	Moderately differentiated; Grade II	IA	T1	N0	M0	None/Unknown	No/Unknown	109	Dead	65	Lobectomy/Bilobectomy
Black	Male	2004	Moderately differentiated; Grade II	IA	T1	N0	M0	Beam radiation	No/Unknown	102	Dead	51	Lobectomy/Bilobectomy
White	Male	2004	Poorly differentiated; Grade III	IA	T1	N0	M0	None/Unknown	No/Unknown	17	Dead	53	Lobectomy/Bilobectomy
White	Male	2004	Moderately differentiated; Grade II	IA	T1	N0	M0	None/Unknown	No/Unknown	28	Dead	65	Lobectomy/Bilobectomy
White	Male	2004	Well differentiated; Grade I	IA	T1	N0	M0	None/Unknown	No/Unknown	44	Dead	67	Lobectomy/Bilobectomy
White	Male	2004	Moderately differentiated; Grade II	IA	T1	N0	M0	None/Unknown	No/Unknown	142	Alive	54	Lobectomy/Bilobectomy
White	Female	2004	Moderately differentiated; Grade II	IA	T1	N0	M0	None/Unknown	No/Unknown	35	Dead	50	Lobectomy/Bilobectomy
White	Female	2004	Poorly differentiated; Grade III	IA	T1	N0	M0	None/Unknown	No/Unknown	92	Dead	73	Lobectomy/Bilobectomy
White	Female	2004	Moderately differentiated; Grade II	IA	T1	N0	M0	None/Unknown	No/Unknown	108	Dead	38	Lobectomy/Bilobectomy
White	Male	2004	Moderately differentiated; Grade II	IA	T1	N0	M0	None/Unknown	No/Unknown	96	Dead	71	Lobectomy/Bilobectomy
White	Male	2004	Moderately differentiated; Grade II	IA	T1	N0	M0	None/Unknown	No/Unknown	138	Alive	68	Lobectomy/Bilobectomy
White	Male	2004	Moderately differentiated; Grade II	IA	T1	N0	M0	None/Unknown	No/Unknown	108	Dead	66	Lobectomy/Bilobectomy
White	Female	2004	Moderately differentiated; Grade II	IA	T1	N0	M0	None/Unknown	No/Unknown	110	Dead	69	Lobectomy/Bilobectomy
Black	Male	2004	Poorly differentiated; Grade III	IA	T1	N0	M0	None/Unknown	No/Unknown	99	Dead	69	Lobectomy/Bilobectomy
White	Female	2004	Moderately differentiated; Grade II	IA	T1	N0	M0	None/Unknown	No/Unknown	40	Dead	72	Lobectomy/Bilobectomy
White	Female	2004	Well differentiated; Grade I	IA	T1	N0	M0	None/Unknown	Yes	104	Dead	78	Lobectomy/Bilobectomy
White	Female	2004	Moderately differentiated; Grade II	IA	T1	N0	M0	None/Unknown	No/Unknown	58	Dead	82	Lobectomy/Bilobectomy
White	Male	2004	Unknown	IA	T1	N0	M0	None/Unknown	No/Unknown	68	Dead	65	Lobectomy/Bilobectomy
White	Male	2004	Poorly differentiated; Grade III	IA	T1	N0	M0	None/Unknown	No/Unknown	69	Dead	72	Lobectomy/Bilobectomy
White	Male	2004	Poorly differentiated; Grade III	IA	T1	N0	M0	None/Unknown	No/Unknown	119	Dead	80	Lobectomy/Bilobectomy
White	Female	2004	Moderately differentiated; Grade II	IA	T1	N0	M0	None/Unknown	Yes	141	Alive	58	Lobectomy/Bilobectomy
White	Female	2004	Moderately differentiated; Grade II	IA	T1	N0	M0	None/Unknown	No/Unknown	140	Alive	58	Lobectomy/Bilobectomy
White	Male	2004	Well differentiated; Grade I	IA	T1	N0	M0	None/Unknown	No/Unknown	93	Dead	63	Lobectomy/Bilobectomy
White	Male	2004	Poorly differentiated; Grade III	IA	T1	N0	M0	None/Unknown	No/Unknown	138	Alive	66	Lobectomy/Bilobectomy
White	Female	2004	Moderately differentiated; Grade II	IA	T1	N0	M0	None/Unknown	No/Unknown	142	Alive	65	Lobectomy/Bilobectomy
White	Male	2004	Poorly differentiated; Grade III	IA	T1	N0	M0	None/Unknown	No/Unknown	141	Alive	64	Lobectomy/Bilobectomy
White	Female	2004	Poorly differentiated; Grade III	IA	T1	N0	M0	None/Unknown	No/Unknown	80	Dead	70	Lobectomy/Bilobectomy
White	Male	2004	Moderately differentiated; Grade II	IA	T1	N0	M0	None/Unknown	No/Unknown	137	Alive	70	Lobectomy/Bilobectomy
White	Female	2004	Moderately differentiated; Grade II	IA	T1	N0	M0	None/Unknown	No/Unknown	141	Alive	36	Lobectomy/Bilobectomy
White	Female	2004	Well differentiated; Grade I	IA	T1	N0	M0	None/Unknown	No/Unknown	6	Dead	78	Lobectomy/Bilobectomy
White	Female	2004	Well differentiated; Grade I	IA	T1	N0	M0	None/Unknown	No/Unknown	138	Alive	57	Lobectomy/Bilobectomy
White	Female	2004	Poorly differentiated; Grade III	IA	T1	N0	M0	None/Unknown	No/Unknown	140	Alive	73	Lobectomy/Bilobectomy
White	Male	2004	Moderately differentiated; Grade II	IA	T1	N0	M0	None/Unknown	No/Unknown	90	Dead	75	Lobectomy/Bilobectomy
White	Female	2004	Moderately differentiated; Grade II	IA	T1	N0	M0	None/Unknown	No/Unknown	72	Dead	55	Lobectomy/Bilobectomy
White	Female	2004	Well differentiated; Grade I	IA	T1	N0	M0	None/Unknown	No/Unknown	21	Dead	73	Lobectomy/Bilobectomy
White	Male	2004	Moderately differentiated; Grade II	IA	T1	N0	M0	None/Unknown	No/Unknown	138	Alive	59	Lobectomy/Bilobectomy
White	Male	2004	Moderately differentiated; Grade II	IA	T1	N0	M0	None/Unknown	No/Unknown	55	Dead	70	Lobectomy/Bilobectomy
White	Female	2004	Poorly differentiated; Grade III	IA	T1	N0	M0	None/Unknown	No/Unknown	134	Alive	80	Lobectomy/Bilobectomy
White	Male	2004	Poorly differentiated; Grade III	IA	T1	N0	M0	None/Unknown	No/Unknown	91	Dead	79	Lobectomy/Bilobectomy
White	Female	2004	Well differentiated; Grade I	IA	T1	N0	M0	None/Unknown	No/Unknown	137	Alive	68	Lobectomy/Bilobectomy
White	Female	2004	Well differentiated; Grade I	IA	T1	N0	M0	None/Unknown	No/Unknown	114	Dead	84	Lobectomy/Bilobectomy
White	Female	2004	Well differentiated; Grade I	IA	T1	N0	M0	None/Unknown	No/Unknown	77	Dead	58	Lobectomy/Bilobectomy
White	Female	2004	Poorly differentiated; Grade III	IA	T1	N0	M0	None/Unknown	No/Unknown	61	Dead	83	Lobectomy/Bilobectomy
White	Female	2004	Poorly differentiated; Grade III	IA	T1	N0	M0	None/Unknown	Yes	81	Dead	70	Lobectomy/Bilobectomy
White	Male	2004	Poorly differentiated; Grade III	IA	T1	N0	M0	None/Unknown	No/Unknown	49	Dead	49	Lobectomy/Bilobectomy
White	Female	2004	Poorly differentiated; Grade III	IA	T1	N0	M0	None/Unknown	No/Unknown	137	Alive	63	Lobectomy/Bilobectomy
White	Female	2004	Well differentiated; Grade I	IA	T1	N0	M0	None/Unknown	No/Unknown	141	Alive	67	Lobectomy/Bilobectomy
White	Female	2004	Moderately differentiated; Grade II	IA	T1	N0	M0	None/Unknown	No/Unknown	139	Alive	76	Lobectomy/Bilobectomy
White	Male	2004	Moderately differentiated; Grade II	IA	T1	N0	M0	None/Unknown	No/Unknown	50	Dead	53	Lobectomy/Bilobectomy
White	Female	2004	Well differentiated; Grade I	IA	T1	N0	M0	None/Unknown	No/Unknown	142	Alive	68	Lobectomy/Bilobectomy
White	Female	2004	Well differentiated; Grade I	IA	T1	N0	M0	None/Unknown	No/Unknown	38	Dead	84	Lobectomy/Bilobectomy
White	Female	2004	Moderately differentiated; Grade II	IA	T1	N0	M0	None/Unknown	No/Unknown	128	Alive	79	Lobectomy/Bilobectomy
White	Female	2004	Poorly differentiated; Grade III	IA	T1	N0	M0	None/Unknown	No/Unknown	134	Alive	52	Lobectomy/Bilobectomy
White	Male	2004	Moderately differentiated; Grade II	IA	T1	N0	M0	None/Unknown	No/Unknown	124	Alive	81	Lobectomy/Bilobectomy
White	Female	2004	Poorly differentiated; Grade III	IA	T1	N0	M0	None/Unknown	No/Unknown	128	Dead	59	Lobectomy/Bilobectomy
White	Female	2004	Moderately differentiated; Grade II	IA	T1	N0	M0	None/Unknown	No/Unknown	140	Alive	70	Lobectomy/Bilobectomy
White	Male	2004	Poorly differentiated; Grade III	IA	T1	N0	M0	None/Unknown	No/Unknown	140	Alive	67	Lobectomy/Bilobectomy
White	Male	2004	Moderately differentiated; Grade II	IA	T1	N0	M0	None/Unknown	Yes	90	Dead	65	Lobectomy/Bilobectomy
White	Male	2004	Poorly differentiated; Grade III	IA	T1	N0	M0	None/Unknown	No/Unknown	29	Dead	78	Lobectomy/Bilobectomy
White	Male	2004	Moderately differentiated; Grade II	IA	T1	N0	M0	Refused	No/Unknown	33	Dead	79	Lobectomy/Bilobectomy
White	Female	2004	Unknown	IA	T1	N0	M0	None/Unknown	Yes	140	Dead	65	Lobectomy/Bilobectomy
White	Female	2004	Moderately differentiated; Grade II	IA	T1	N0	M0	None/Unknown	No/Unknown	79	Dead	66	Lobectomy/Bilobectomy
White	Female	2004	Moderately differentiated; Grade II	IA	T1	N0	M0	None/Unknown	No/Unknown	19	Alive	52	Lobectomy/Bilobectomy
White	Female	2004	Well differentiated; Grade I	IA	T1	N0	M0	None/Unknown	No/Unknown	143	Alive	62	Lobectomy/Bilobectomy
White	Male	2004	Well differentiated; Grade I	IA	T1	N0	M0	Beam radiation	No/Unknown	85	Dead	76	Lobectomy/Bilobectomy
White	Female	2004	Well differentiated; Grade I	IA	T1	N0	M0	None/Unknown	No/Unknown	132	Alive	59	Lobectomy/Bilobectomy
White	Male	2004	Moderately differentiated; Grade II	IA	T1	N0	M0	None/Unknown	No/Unknown	128	Dead	76	Lobectomy/Bilobectomy
Black	Female	2004	Moderately differentiated; Grade II	IA	T1	N0	M0	None/Unknown	No/Unknown	80	Dead	51	Lobectomy/Bilobectomy
White	Male	2004	Poorly differentiated; Grade III	IA	T1	N0	M0	Beam radiation	Yes	24	Dead	61	Lobectomy/Bilobectomy
White	Male	2004	Moderately differentiated; Grade II	IA	T1	N0	M0	None/Unknown	No/Unknown	133	Alive	63	Lobectomy/Bilobectomy
White	Male	2004	Well differentiated; Grade I	IA	T1	N0	M0	None/Unknown	No/Unknown	132	Alive	66	Lobectomy/Bilobectomy
Other (American Indian/AK Native, Asian/Pacific Islander)	Male	2004	Moderately differentiated; Grade II	IA	T1	N0	M0	None/Unknown	No/Unknown	112	Dead	68	Lobectomy/Bilobectomy
White	Female	2004	Moderately differentiated; Grade II	IA	T1	N0	M0	None/Unknown	No/Unknown	37	Dead	68	Lobectomy/Bilobectomy
White	Female	2004	Moderately differentiated; Grade II	IA	T1	N0	M0	None/Unknown	No/Unknown	139	Alive	73	Lobectomy/Bilobectomy
White	Female	2004	Poorly differentiated; Grade III	IA	T1	N0	M0	None/Unknown	No/Unknown	127	Dead	84	Lobectomy/Bilobectomy
White	Male	2004	Poorly differentiated; Grade III	IA	T1	N0	M0	None/Unknown	No/Unknown	109	Dead	67	Lobectomy/Bilobectomy
White	Male	2004	Poorly differentiated; Grade III	IA	T1	N0	M0	None/Unknown	No/Unknown	53	Dead	79	Lobectomy/Bilobectomy
White	Female	2004	Moderately differentiated; Grade II	IA	T1	N0	M0	None/Unknown	No/Unknown	7	Dead	77	Lobectomy/Bilobectomy
White	Male	2004	Moderately differentiated; Grade II	IA	T1	N0	M0	None/Unknown	No/Unknown	142	Alive	63	Lobectomy/Bilobectomy
White	Female	2004	Moderately differentiated; Grade II	IA	T1	N0	M0	None/Unknown	No/Unknown	24	Dead	68	Lobectomy/Bilobectomy
White	Female	2004	Moderately differentiated; Grade II	IA	T1	N0	M0	None/Unknown	No/Unknown	14	Dead	65	Lobectomy/Bilobectomy
White	Female	2004	Poorly differentiated; Grade III	IA	T1	N0	M0	None/Unknown	No/Unknown	60	Dead	77	Lobectomy/Bilobectomy
Black	Male	2004	Poorly differentiated; Grade III	IA	T1	N0	M0	None/Unknown	No/Unknown	37	Dead	59	Lobectomy/Bilobectomy
White	Male	2004	Poorly differentiated; Grade III	IA	T1	N0	M0	None/Unknown	No/Unknown	141	Alive	63	Lobectomy/Bilobectomy
White	Female	2004	Well differentiated; Grade I	IA	T1	N0	M0	None/Unknown	No/Unknown	141	Alive	70	Lobectomy/Bilobectomy
White	Female	2004	Moderately differentiated; Grade II	IA	T1	N0	M0	None/Unknown	No/Unknown	140	Alive	72	Lobectomy/Bilobectomy
White	Female	2004	Well differentiated; Grade I	IA	T1	N0	M0	None/Unknown	No/Unknown	125	Alive	73	Lobectomy/Bilobectomy
White	Female	2004	Moderately differentiated; Grade II	IA	T1	N0	M0	None/Unknown	No/Unknown	141	Alive	61	Lobectomy/Bilobectomy
White	Female	2004	Poorly differentiated; Grade III	IA	T1	N0	M0	None/Unknown	No/Unknown	99	Dead	72	Lobectomy/Bilobectomy
White	Male	2004	Moderately differentiated; Grade II	IA	T1	N0	M0	None/Unknown	No/Unknown	104	Dead	62	Lobectomy/Bilobectomy
Black	Female	2004	Poorly differentiated; Grade III	IA	T1	N0	M0	None/Unknown	No/Unknown	89	Dead	66	Lobectomy/Bilobectomy
White	Female	2004	Well differentiated; Grade I	IA	T1	N0	M0	None/Unknown	No/Unknown	88	Dead	80	Lobectomy/Bilobectomy
White	Female	2004	Moderately differentiated; Grade II	IA	T1	N0	M0	None/Unknown	No/Unknown	134	Alive	69	Lobectomy/Bilobectomy
White	Male	2004	Moderately differentiated; Grade II	IA	T1	N0	M0	None/Unknown	No/Unknown	107	Dead	67	Lobectomy/Bilobectomy
Black	Female	2004	Moderately differentiated; Grade II	IA	T1	N0	M0	None/Unknown	No/Unknown	54	Dead	81	Lobectomy/Bilobectomy
White	Male	2004	Poorly differentiated; Grade III	IA	T1	N0	M0	None/Unknown	No/Unknown	93	Dead	68	Lobectomy/Bilobectomy
White	Female	2004	Moderately differentiated; Grade II	IA	T1	N0	M0	None/Unknown	No/Unknown	135	Alive	61	Lobectomy/Bilobectomy
White	Male	2004	Well differentiated; Grade I	IA	T1	N0	M0	None/Unknown	No/Unknown	136	Alive	67	Lobectomy/Bilobectomy
White	Female	2004	Moderately differentiated; Grade II	IA	T1	N0	M0	None/Unknown	No/Unknown	134	Dead	67	Lobectomy/Bilobectomy
White	Male	2004	Moderately differentiated; Grade II	IA	T1	N0	M0	None/Unknown	No/Unknown	49	Dead	65	Lobectomy/Bilobectomy
White	Male	2004	Moderately differentiated; Grade II	IA	T1	N0	M0	None/Unknown	No/Unknown	134	Alive	66	Lobectomy/Bilobectomy
White	Female	2004	Poorly differentiated; Grade III	IA	T1	N0	M0	None/Unknown	No/Unknown	48	Dead	49	Lobectomy/Bilobectomy
White	Female	2004	Moderately differentiated; Grade II	IA	T1	N0	M0	None/Unknown	No/Unknown	108	Dead	80	Lobectomy/Bilobectomy
White	Male	2004	Moderately differentiated; Grade II	IA	T1	N0	M0	None/Unknown	No/Unknown	132	Alive	71	Lobectomy/Bilobectomy
White	Female	2004	Moderately differentiated; Grade II	IA	T1	N0	M0	None/Unknown	No/Unknown	91	Dead	72	Lobectomy/Bilobectomy
Other (American Indian/AK Native, Asian/Pacific Islander)	Male	2004	Poorly differentiated; Grade III	IA	T1	N0	M0	None/Unknown	No/Unknown	12	Alive	74	Lobectomy/Bilobectomy
White	Male	2004	Poorly differentiated; Grade III	IA	T1	N0	M0	None/Unknown	No/Unknown	17	Dead	75	Lobectomy/Bilobectomy
White	Female	2004	Poorly differentiated; Grade III	IA	T1	N0	M0	None/Unknown	No/Unknown	132	Alive	70	Lobectomy/Bilobectomy
White	Male	2004	Poorly differentiated; Grade III	IA	T1	N0	M0	None/Unknown	No/Unknown	29	Dead	76	Lobectomy/Bilobectomy
White	Male	2004	Well differentiated; Grade I	IA	T1	N0	M0	None/Unknown	No/Unknown	134	Alive	69	Lobectomy/Bilobectomy
White	Female	2004	Moderately differentiated; Grade II	IA	T1	N0	M0	None/Unknown	No/Unknown	41	Dead	72	Lobectomy/Bilobectomy
Black	Female	2004	Well differentiated; Grade I	IA	T1	N0	M0	None/Unknown	No/Unknown	139	Alive	64	Lobectomy/Bilobectomy
White	Female	2004	Well differentiated; Grade I	IA	T1	N0	M0	None/Unknown	No/Unknown	137	Alive	66	Lobectomy/Bilobectomy
White	Male	2004	Moderately differentiated; Grade II	IA	T1	N0	M0	None/Unknown	No/Unknown	102	Dead	53	Lobectomy/Bilobectomy
Other (American Indian/AK Native, Asian/Pacific Islander)	Male	2004	Well differentiated; Grade I	IA	T1	N0	M0	None/Unknown	No/Unknown	104	Dead	61	Lobectomy/Bilobectomy
White	Female	2004	Moderately differentiated; Grade II	IA	T1	N0	M0	None/Unknown	No/Unknown	132	Alive	64	Lobectomy/Bilobectomy
White	Female	2004	Well differentiated; Grade I	IA	T1	N0	M0	None/Unknown	No/Unknown	101	Dead	44	Lobectomy/Bilobectomy
White	Female	2004	Poorly differentiated; Grade III	IA	T1	N0	M0	None/Unknown	No/Unknown	133	Alive	54	Lobectomy/Bilobectomy
White	Female	2004	Well differentiated; Grade I	IA	T1	N0	M0	None/Unknown	No/Unknown	135	Alive	57	Lobectomy/Bilobectomy
White	Female	2004	Well differentiated; Grade I	IA	T1	N0	M0	None/Unknown	No/Unknown	81	Dead	66	Lobectomy/Bilobectomy
White	Male	2004	Poorly differentiated; Grade III	IA	T1	N0	M0	None/Unknown	No/Unknown	23	Dead	71	Lobectomy/Bilobectomy
White	Male	2004	Well differentiated; Grade I	IA	T1	N0	M0	None/Unknown	No/Unknown	137	Alive	68	Lobectomy/Bilobectomy
White	Female	2004	Moderately differentiated; Grade II	IA	T1	N0	M0	None/Unknown	No/Unknown	121	Alive	44	Lobectomy/Bilobectomy
White	Male	2004	Poorly differentiated; Grade III	IA	T1	N0	M0	None/Unknown	No/Unknown	22	Dead	70	Lobectomy/Bilobectomy
White	Female	2004	Moderately differentiated; Grade II	IA	T1	N0	M0	None/Unknown	No/Unknown	132	Alive	67	Lobectomy/Bilobectomy
White	Female	2004	Moderately differentiated; Grade II	IA	T1	N0	M0	None/Unknown	No/Unknown	1	Dead	82	Lobectomy/Bilobectomy
White	Male	2004	Poorly differentiated; Grade III	IA	T1	N0	M0	None/Unknown	No/Unknown	2	Dead	76	Lobectomy/Bilobectomy
White	Female	2004	Unknown	IA	T1	N0	M0	None/Unknown	No/Unknown	72	Dead	69	Lobectomy/Bilobectomy
White	Female	2004	Poorly differentiated; Grade III	IA	T1	N0	M0	None/Unknown	No/Unknown	132	Alive	64	Lobectomy/Bilobectomy
White	Female	2004	Poorly differentiated; Grade III	IA	T1	N0	M0	Beam radiation	Yes	136	Alive	56	Lobectomy/Bilobectomy
White	Female	2004	Moderately differentiated; Grade II	IA	T1	N0	M0	None/Unknown	No/Unknown	41	Dead	71	Lobectomy/Bilobectomy
White	Female	2004	Well differentiated; Grade I	IA	T1	N0	M0	None/Unknown	No/Unknown	139	Alive	68	Lobectomy/Bilobectomy
White	Male	2004	Well differentiated; Grade I	IA	T1	N0	M0	None/Unknown	No/Unknown	82	Dead	68	Lobectomy/Bilobectomy
White	Female	2004	Moderately differentiated; Grade II	IA	T1	N0	M0	None/Unknown	No/Unknown	3	Dead	76	Lobectomy/Bilobectomy
White	Female	2004	Moderately differentiated; Grade II	IA	T1	N0	M0	None/Unknown	No/Unknown	133	Alive	56	Lobectomy/Bilobectomy
White	Male	2004	Poorly differentiated; Grade III	IA	T1	N0	M0	None/Unknown	No/Unknown	124	Dead	68	Lobectomy/Bilobectomy
White	Female	2004	Well differentiated; Grade I	IA	T1	N0	M0	None/Unknown	No/Unknown	107	Dead	72	Lobectomy/Bilobectomy
White	Male	2004	Well differentiated; Grade I	IA	T1	N0	M0	None/Unknown	No/Unknown	134	Alive	66	Lobectomy/Bilobectomy
White	Male	2004	Well differentiated; Grade I	IA	T1	N0	M0	None/Unknown	No/Unknown	136	Alive	84	Lobectomy/Bilobectomy
White	Female	2004	Poorly differentiated; Grade III	IA	T1	N0	M0	None/Unknown	No/Unknown	131	Dead	66	Lobectomy/Bilobectomy
Black	Male	2004	Moderately differentiated; Grade II	IA	T1	N0	M0	None/Unknown	No/Unknown	19	Dead	71	Lobectomy/Bilobectomy
White	Female	2004	Poorly differentiated; Grade III	IA	T1	N0	M0	None/Unknown	Yes	132	Alive	60	Lobectomy/Bilobectomy
White	Male	2004	Moderately differentiated; Grade II	IA	T1	N0	M0	None/Unknown	No/Unknown	136	Alive	62	Lobectomy/Bilobectomy
White	Female	2004	Moderately differentiated; Grade II	IA	T1	N0	M0	None/Unknown	No/Unknown	124	Alive	57	Lobectomy/Bilobectomy
White	Female	2004	Moderately differentiated; Grade II	IA	T1	N0	M0	None/Unknown	No/Unknown	137	Alive	47	Lobectomy/Bilobectomy
Other (American Indian/AK Native, Asian/Pacific Islander)	Female	2004	Well differentiated; Grade I	IA	T1	N0	M0	None/Unknown	No/Unknown	136	Alive	72	Lobectomy/Bilobectomy
White	Female	2004	Well differentiated; Grade I	IA	T1	N0	M0	None/Unknown	No/Unknown	119	Dead	76	Lobectomy/Bilobectomy
White	Female	2004	Moderately differentiated; Grade II	IA	T1	N0	M0	None/Unknown	No/Unknown	136	Alive	60	Lobectomy/Bilobectomy
White	Male	2004	Moderately differentiated; Grade II	IA	T1	N0	M0	None/Unknown	No/Unknown	63	Dead	77	Lobectomy/Bilobectomy
White	Male	2004	Well differentiated; Grade I	IA	T1	N0	M0	None/Unknown	No/Unknown	133	Alive	64	Lobectomy/Bilobectomy
Other (American Indian/AK Native, Asian/Pacific Islander)	Male	2004	Moderately differentiated; Grade II	IA	T1	N0	M0	None/Unknown	No/Unknown	132	Alive	64	Lobectomy/Bilobectomy
White	Male	2004	Well differentiated; Grade I	IA	T1	N0	M0	None/Unknown	No/Unknown	8	Dead	74	Lobectomy/Bilobectomy
White	Female	2004	Well differentiated; Grade I	IA	T1	N0	M0	None/Unknown	No/Unknown	142	Alive	40	Lobectomy/Bilobectomy
Black	Male	2004	Poorly differentiated; Grade III	IA	T1	N0	M0	None/Unknown	No/Unknown	91	Dead	77	Lobectomy/Bilobectomy
White	Male	2004	Well differentiated; Grade I	IA	T1	N0	M0	None/Unknown	No/Unknown	141	Alive	71	Lobectomy/Bilobectomy
White	Male	2004	Poorly differentiated; Grade III	IA	T1	N0	M0	None/Unknown	Yes	70	Dead	61	Lobectomy/Bilobectomy
White	Male	2004	Poorly differentiated; Grade III	IA	T1	N0	M0	None/Unknown	No/Unknown	139	Alive	60	Lobectomy/Bilobectomy
White	Male	2004	Moderately differentiated; Grade II	IA	T1	N0	M0	None/Unknown	No/Unknown	70	Dead	64	Lobectomy/Bilobectomy
White	Male	2004	Moderately differentiated; Grade II	IA	T1	N0	M0	None/Unknown	No/Unknown	139	Alive	72	Lobectomy/Bilobectomy
White	Female	2004	Moderately differentiated; Grade II	IA	T1	N0	M0	None/Unknown	No/Unknown	143	Alive	67	Lobectomy/Bilobectomy
White	Female	2004	Moderately differentiated; Grade II	IA	T1	N0	M0	None/Unknown	No/Unknown	60	Dead	60	Lobectomy/Bilobectomy
White	Female	2004	Moderately differentiated; Grade II	IA	T1	N0	M0	None/Unknown	No/Unknown	140	Alive	41	Lobectomy/Bilobectomy
White	Female	2004	Moderately differentiated; Grade II	IA	T1	N0	M0	None/Unknown	No/Unknown	3	Dead	66	Lobectomy/Bilobectomy
Black	Female	2004	Moderately differentiated; Grade II	IA	T1	N0	M0	None/Unknown	No/Unknown	84	Dead	64	Lobectomy/Bilobectomy
White	Male	2004	Poorly differentiated; Grade III	IA	T1	N0	M0	None/Unknown	No/Unknown	15	Dead	74	Lobectomy/Bilobectomy
White	Female	2004	Moderately differentiated; Grade II	IA	T1	N0	M0	None/Unknown	No/Unknown	23	Dead	66	Lobectomy/Bilobectomy
White	Male	2004	Unknown	IA	T1	N0	M0	None/Unknown	No/Unknown	124	Dead	70	Lobectomy/Bilobectomy
White	Female	2004	Poorly differentiated; Grade III	IA	T1	N0	M0	None/Unknown	No/Unknown	24	Dead	66	Lobectomy/Bilobectomy
White	Male	2004	Poorly differentiated; Grade III	IA	T1	N0	M0	None/Unknown	No/Unknown	139	Alive	56	Lobectomy/Bilobectomy
White	Male	2004	Poorly differentiated; Grade III	IA	T1	N0	M0	None/Unknown	No/Unknown	41	Dead	63	Lobectomy/Bilobectomy
White	Female	2004	Well differentiated; Grade I	IA	T1	N0	M0	None/Unknown	No/Unknown	56	Dead	50	Lobectomy/Bilobectomy
Black	Female	2004	Unknown	IA	T1	N0	M0	None/Unknown	No/Unknown	141	Alive	71	Lobectomy/Bilobectomy
White	Female	2004	Moderately differentiated; Grade II	IA	T1	N0	M0	None/Unknown	Yes	47	Dead	48	Lobectomy/Bilobectomy
White	Female	2004	Poorly differentiated; Grade III	IA	T1	N0	M0	None/Unknown	No/Unknown	143	Alive	65	Lobectomy/Bilobectomy
White	Female	2004	Moderately differentiated; Grade II	IA	T1	N0	M0	None/Unknown	No/Unknown	143	Alive	72	Lobectomy/Bilobectomy
White	Male	2004	Moderately differentiated; Grade II	IA	T1	N0	M0	None/Unknown	Yes	102	Dead	44	Lobectomy/Bilobectomy
White	Female	2004	Moderately differentiated; Grade II	IA	T1	N0	M0	None/Unknown	No/Unknown	65	Dead	72	Lobectomy/Bilobectomy
White	Female	2004	Moderately differentiated; Grade II	IA	T1	N0	M0	None/Unknown	No/Unknown	142	Alive	58	Lobectomy/Bilobectomy
White	Male	2004	Poorly differentiated; Grade III	IA	T1	N0	M0	None/Unknown	No/Unknown	57	Dead	77	Lobectomy/Bilobectomy
White	Male	2004	Moderately differentiated; Grade II	IA	T1	N0	M0	None/Unknown	No/Unknown	122	Dead	71	Lobectomy/Bilobectomy
White	Male	2004	Moderately differentiated; Grade II	IA	T1	N0	M0	None/Unknown	No/Unknown	143	Alive	80	Lobectomy/Bilobectomy
White	Male	2004	Poorly differentiated; Grade III	IA	T1	N0	M0	None/Unknown	No/Unknown	143	Alive	64	Lobectomy/Bilobectomy
White	Female	2004	Moderately differentiated; Grade II	IA	T1	N0	M0	None/Unknown	No/Unknown	112	Dead	47	Lobectomy/Bilobectomy
White	Female	2004	Moderately differentiated; Grade II	IA	T1	N0	M0	None/Unknown	No/Unknown	40	Dead	62	Lobectomy/Bilobectomy
White	Male	2004	Moderately differentiated; Grade II	IA	T1	N0	M0	None/Unknown	No/Unknown	97	Dead	62	Lobectomy/Bilobectomy
White	Female	2004	Well differentiated; Grade I	IA	T1	N0	M0	None/Unknown	No/Unknown	56	Dead	66	Lobectomy/Bilobectomy
White	Female	2004	Well differentiated; Grade I	IA	T1	N0	M0	None/Unknown	No/Unknown	142	Alive	54	Lobectomy/Bilobectomy
White	Female	2004	Poorly differentiated; Grade III	IA	T1	N0	M0	None/Unknown	No/Unknown	90	Dead	51	Lobectomy/Bilobectomy
White	Female	2004	Moderately differentiated; Grade II	IA	T1	N0	M0	None/Unknown	No/Unknown	142	Alive	66	Lobectomy/Bilobectomy
White	Male	2004	Moderately differentiated; Grade II	IA	T1	N0	M0	None/Unknown	No/Unknown	92	Dead	58	Lobectomy/Bilobectomy
White	Female	2004	Moderately differentiated; Grade II	IA	T1	N0	M0	None/Unknown	No/Unknown	139	Alive	60	Lobectomy/Bilobectomy
White	Female	2004	Moderately differentiated; Grade II	IA	T1	N0	M0	None/Unknown	No/Unknown	141	Alive	74	Lobectomy/Bilobectomy
White	Male	2004	Moderately differentiated; Grade II	IA	T1	N0	M0	None/Unknown	No/Unknown	124	Dead	68	Lobectomy/Bilobectomy
White	Male	2004	Moderately differentiated; Grade II	IA	T1	N0	M0	None/Unknown	No/Unknown	137	Dead	62	Lobectomy/Bilobectomy
White	Male	2004	Poorly differentiated; Grade III	IA	T1	N0	M0	None/Unknown	No/Unknown	128	Dead	61	Lobectomy/Bilobectomy
White	Female	2004	Well differentiated; Grade I	IA	T1	N0	M0	None/Unknown	No/Unknown	34	Dead	70	Lobectomy/Bilobectomy
White	Male	2004	Moderately differentiated; Grade II	IA	T1	N0	M0	None/Unknown	No/Unknown	0	Dead	63	Lobectomy/Bilobectomy
White	Male	2004	Moderately differentiated; Grade II	IA	T1	N0	M0	None/Unknown	No/Unknown	124	Dead	70	Lobectomy/Bilobectomy
White	Male	2004	Poorly differentiated; Grade III	IA	T1	N0	M0	None/Unknown	No/Unknown	139	Alive	47	Lobectomy/Bilobectomy
White	Female	2004	Moderately differentiated; Grade II	IA	T1	N0	M0	None/Unknown	No/Unknown	138	Alive	71	Lobectomy/Bilobectomy
White	Female	2004	Moderately differentiated; Grade II	IA	T1	N0	M0	None/Unknown	No/Unknown	138	Alive	60	Lobectomy/Bilobectomy
White	Female	2004	Moderately differentiated; Grade II	IA	T1	N0	M0	None/Unknown	No/Unknown	135	Alive	62	Lobectomy/Bilobectomy
White	Male	2004	Moderately differentiated; Grade II	IA	T1	N0	M0	None/Unknown	No/Unknown	17	Dead	60	Lobectomy/Bilobectomy
White	Female	2004	Poorly differentiated; Grade III	IA	T1	N0	M0	None/Unknown	No/Unknown	67	Dead	44	Lobectomy/Bilobectomy
White	Female	2004	Moderately differentiated; Grade II	IA	T1	N0	M0	None/Unknown	No/Unknown	142	Alive	67	Lobectomy/Bilobectomy
Black	Female	2004	Moderately differentiated; Grade II	IA	T1	N0	M0	None/Unknown	No/Unknown	137	Alive	72	Lobectomy/Bilobectomy
White	Female	2004	Poorly differentiated; Grade III	IA	T1	N0	M0	None/Unknown	No/Unknown	114	Dead	77	Lobectomy/Bilobectomy
White	Male	2004	Moderately differentiated; Grade II	IA	T1	N0	M0	None/Unknown	No/Unknown	39	Dead	71	Lobectomy/Bilobectomy
White	Female	2004	Poorly differentiated; Grade III	IA	T1	N0	M0	None/Unknown	No/Unknown	34	Dead	58	Lobectomy/Bilobectomy
White	Female	2004	Well differentiated; Grade I	IA	T1	N0	M0	None/Unknown	No/Unknown	126	Dead	70	Lobectomy/Bilobectomy
White	Female	2004	Poorly differentiated; Grade III	IA	T1	N0	M0	None/Unknown	No/Unknown	9	Dead	82	Lobectomy/Bilobectomy
White	Male	2004	Poorly differentiated; Grade III	IA	T1	N0	M0	None/Unknown	No/Unknown	26	Dead	78	Lobectomy/Bilobectomy
White	Male	2004	Poorly differentiated; Grade III	IA	T1	N0	M0	None/Unknown	No/Unknown	13	Dead	61	Lobectomy/Bilobectomy
White	Female	2004	Moderately differentiated; Grade II	IA	T1	N0	M0	None/Unknown	No/Unknown	133	Alive	68	Lobectomy/Bilobectomy
White	Female	2004	Unknown	IA	T1	N0	M0	None/Unknown	No/Unknown	103	Dead	63	Lobectomy/Bilobectomy
White	Female	2004	Moderately differentiated; Grade II	IA	T1	N0	M0	None/Unknown	No/Unknown	15	Dead	49	Lobectomy/Bilobectomy
White	Male	2004	Moderately differentiated; Grade II	IA	T1	N0	M0	None/Unknown	No/Unknown	123	Dead	70	Lobectomy/Bilobectomy
White	Male	2004	Poorly differentiated; Grade III	IA	T1	N0	M0	None/Unknown	No/Unknown	27	Dead	71	Lobectomy/Bilobectomy
White	Female	2004	Moderately differentiated; Grade II	IA	T1	N0	M0	None/Unknown	No/Unknown	105	Dead	70	Lobectomy/Bilobectomy
White	Male	2004	Poorly differentiated; Grade III	IA	T1	N0	M0	None/Unknown	No/Unknown	13	Dead	70	Lobectomy/Bilobectomy
White	Female	2004	Moderately differentiated; Grade II	IA	T1	N0	M0	None/Unknown	No/Unknown	40	Dead	60	Lobectomy/Bilobectomy
Black	Female	2004	Poorly differentiated; Grade III	IA	T1	N0	M0	None/Unknown	No/Unknown	134	Alive	55	Lobectomy/Bilobectomy
White	Male	2004	Moderately differentiated; Grade II	IA	T1	N0	M0	None/Unknown	No/Unknown	136	Alive	58	Lobectomy/Bilobectomy
White	Male	2004	Moderately differentiated; Grade II	IA	T1	N0	M0	None/Unknown	No/Unknown	76	Dead	80	Lobectomy/Bilobectomy
White	Male	2004	Poorly differentiated; Grade III	IA	T1	N0	M0	None/Unknown	No/Unknown	125	Dead	71	Lobectomy/Bilobectomy
White	Male	2004	Poorly differentiated; Grade III	IA	T1	N0	M0	Beam radiation	Yes	41	Dead	55	Lobectomy/Bilobectomy
White	Male	2004	Poorly differentiated; Grade III	IA	T1	N0	M0	None/Unknown	No/Unknown	73	Dead	69	Lobectomy/Bilobectomy
White	Male	2004	Poorly differentiated; Grade III	IA	T1	N0	M0	None/Unknown	No/Unknown	114	Dead	68	Lobectomy/Bilobectomy
White	Female	2004	Moderately differentiated; Grade II	IA	T1	N0	M0	None/Unknown	No/Unknown	138	Alive	64	Lobectomy/Bilobectomy
White	Female	2004	Moderately differentiated; Grade II	IA	T1	N0	M0	None/Unknown	No/Unknown	51	Dead	74	Lobectomy/Bilobectomy
White	Male	2004	Moderately differentiated; Grade II	IA	T1	N0	M0	None/Unknown	Yes	11	Dead	77	Lobectomy/Bilobectomy
White	Male	2004	Poorly differentiated; Grade III	IA	T1	N0	M0	None/Unknown	Yes	130	Dead	71	Lobectomy/Bilobectomy
White	Female	2004	Unknown	IA	T1	N0	M0	None/Unknown	No/Unknown	133	Dead	73	Lobectomy/Bilobectomy
White	Male	2004	Unknown	IA	T1	N0	M0	None/Unknown	No/Unknown	28	Dead	63	Lobectomy/Bilobectomy
White	Male	2004	Well differentiated; Grade I	IA	T1	N0	M0	None/Unknown	No/Unknown	128	Dead	74	Lobectomy/Bilobectomy
White	Female	2004	Unknown	IA	T1	N0	M0	None/Unknown	No/Unknown	86	Dead	68	Lobectomy/Bilobectomy
White	Male	2004	Poorly differentiated; Grade III	IA	T1	N0	M0	None/Unknown	No/Unknown	27	Dead	66	Lobectomy/Bilobectomy
White	Female	2004	Moderately differentiated; Grade II	IA	T1	N0	M0	None/Unknown	No/Unknown	45	Dead	61	Lobectomy/Bilobectomy
Black	Female	2004	Poorly differentiated; Grade III	IA	T1	N0	M0	None/Unknown	No/Unknown	38	Dead	67	Lobectomy/Bilobectomy
White	Female	2004	Moderately differentiated; Grade II	IA	T1	N0	M0	None/Unknown	No/Unknown	64	Dead	45	Lobectomy/Bilobectomy
White	Female	2004	Poorly differentiated; Grade III	IA	T1	N0	M0	None/Unknown	No/Unknown	143	Alive	63	Lobectomy/Bilobectomy
White	Female	2004	Unknown	IA	T1	N0	M0	None/Unknown	No/Unknown	94	Dead	74	Lobectomy/Bilobectomy
White	Male	2004	Moderately differentiated; Grade II	IA	T1	N0	M0	None/Unknown	No/Unknown	139	Alive	81	Lobectomy/Bilobectomy
White	Male	2004	Poorly differentiated; Grade III	IA	T1	N0	M0	None/Unknown	No/Unknown	113	Dead	57	Lobectomy/Bilobectomy
White	Female	2004	Poorly differentiated; Grade III	IA	T1	N0	M0	None/Unknown	No/Unknown	48	Dead	73	Lobectomy/Bilobectomy
White	Female	2004	Poorly differentiated; Grade III	IA	T1	N0	M0	None/Unknown	No/Unknown	8	Dead	65	Lobectomy/Bilobectomy
White	Female	2004	Moderately differentiated; Grade II	IA	T1	N0	M0	None/Unknown	No/Unknown	19	Dead	69	Lobectomy/Bilobectomy
Black	Female	2004	Moderately differentiated; Grade II	IA	T1	N0	M0	None/Unknown	No/Unknown	72	Dead	54	Lobectomy/Bilobectomy
White	Female	2004	Moderately differentiated; Grade II	IA	T1	N0	M0	None/Unknown	No/Unknown	142	Alive	59	Lobectomy/Bilobectomy
Black	Male	2004	Well differentiated; Grade I	IA	T1	N0	M0	None/Unknown	No/Unknown	95	Dead	47	Lobectomy/Bilobectomy
Black	Male	2004	Well differentiated; Grade I	IA	T1	N0	M0	None/Unknown	No/Unknown	109	Dead	69	Lobectomy/Bilobectomy
White	Male	2004	Poorly differentiated; Grade III	IA	T1	N0	M0	None/Unknown	Yes	137	Alive	48	Lobectomy/Bilobectomy
Black	Male	2004	Moderately differentiated; Grade II	IA	T1	N0	M0	None/Unknown	No/Unknown	138	Alive	52	Lobectomy/Bilobectomy
White	Male	2004	Poorly differentiated; Grade III	IA	T1	N0	M0	None/Unknown	No/Unknown	3	Dead	55	Lobectomy/Bilobectomy
White	Male	2004	Moderately differentiated; Grade II	IA	T1	N0	M0	None/Unknown	No/Unknown	69	Dead	59	Lobectomy/Bilobectomy
White	Male	2004	Unknown	IA	T1	N0	M0	None/Unknown	No/Unknown	60	Dead	63	Lobectomy/Bilobectomy
White	Male	2004	Poorly differentiated; Grade III	IA	T1	N0	M0	None/Unknown	No/Unknown	23	Dead	71	Lobectomy/Bilobectomy
White	Male	2004	Poorly differentiated; Grade III	IA	T1	N0	M0	None/Unknown	No/Unknown	138	Alive	57	Lobectomy/Bilobectomy
White	Male	2004	Moderately differentiated; Grade II	IA	T1	N0	M0	None/Unknown	No/Unknown	65	Dead	67	Lobectomy/Bilobectomy
White	Male	2004	Moderately differentiated; Grade II	IA	T1	N0	M0	None/Unknown	No/Unknown	99	Dead	71	Lobectomy/Bilobectomy
White	Female	2004	Moderately differentiated; Grade II	IA	T1	N0	M0	None/Unknown	No/Unknown	109	Dead	62	Lobectomy/Bilobectomy
White	Female	2004	Moderately differentiated; Grade II	IA	T1	N0	M0	None/Unknown	No/Unknown	137	Alive	78	Lobectomy/Bilobectomy
White	Male	2004	Poorly differentiated; Grade III	IA	T1	N0	M0	None/Unknown	No/Unknown	62	Dead	53	Lobectomy/Bilobectomy
White	Male	2004	Moderately differentiated; Grade II	IA	T1	N0	M0	None/Unknown	No/Unknown	21	Dead	73	Lobectomy/Bilobectomy
White	Female	2004	Moderately differentiated; Grade II	IA	T1	N0	M0	None/Unknown	No/Unknown	119	Dead	68	Lobectomy/Bilobectomy
White	Male	2004	Moderately differentiated; Grade II	IA	T1	N0	M0	None/Unknown	No/Unknown	17	Dead	57	Lobectomy/Bilobectomy
White	Male	2004	Poorly differentiated; Grade III	IA	T1	N0	M0	None/Unknown	No/Unknown	133	Alive	52	Lobectomy/Bilobectomy
White	Male	2004	Moderately differentiated; Grade II	IA	T1	N0	M0	None/Unknown	No/Unknown	26	Dead	85	Lobectomy/Bilobectomy
White	Female	2004	Poorly differentiated; Grade III	IA	T1	N0	M0	None/Unknown	No/Unknown	73	Dead	69	Lobectomy/Bilobectomy
White	Male	2004	Poorly differentiated; Grade III	IA	T1	N0	M0	None/Unknown	No/Unknown	120	Dead	69	Lobectomy/Bilobectomy
White	Male	2004	Moderately differentiated; Grade II	IA	T1	N0	M0	None/Unknown	No/Unknown	138	Alive	50	Lobectomy/Bilobectomy
White	Male	2004	Moderately differentiated; Grade II	IA	T1	N0	M0	None/Unknown	No/Unknown	48	Dead	77	Lobectomy/Bilobectomy
White	Female	2004	Poorly differentiated; Grade III	IA	T1	N0	M0	None/Unknown	No/Unknown	136	Alive	72	Lobectomy/Bilobectomy
White	Female	2004	Moderately differentiated; Grade II	IA	T1	N0	M0	None/Unknown	No/Unknown	136	Alive	65	Lobectomy/Bilobectomy
White	Male	2004	Poorly differentiated; Grade III	IA	T1	N0	M0	None/Unknown	No/Unknown	140	Alive	67	Lobectomy/Bilobectomy
White	Female	2004	Unknown	IA	T1	N0	M0	None/Unknown	No/Unknown	25	Dead	74	Lobectomy/Bilobectomy
White	Female	2004	Poorly differentiated; Grade III	IA	T1	N0	M0	None/Unknown	No/Unknown	97	Dead	48	Lobectomy/Bilobectomy
White	Female	2004	Well differentiated; Grade I	IA	T1	N0	M0	None/Unknown	No/Unknown	140	Alive	51	Lobectomy/Bilobectomy
Black	Female	2004	Moderately differentiated; Grade II	IA	T1	N0	M0	None/Unknown	No/Unknown	29	Dead	62	Lobectomy/Bilobectomy
White	Female	2004	Moderately differentiated; Grade II	IA	T1	N0	M0	None/Unknown	No/Unknown	55	Dead	73	Lobectomy/Bilobectomy
Black	Male	2004	Moderately differentiated; Grade II	IA	T1	N0	M0	None/Unknown	No/Unknown	25	Dead	51	Lobectomy/Bilobectomy
White	Male	2004	Moderately differentiated; Grade II	IA	T1	N0	M0	None/Unknown	No/Unknown	140	Alive	52	Lobectomy/Bilobectomy
Black	Male	2004	Poorly differentiated; Grade III	IA	T1	N0	M0	None/Unknown	No/Unknown	15	Dead	73	Lobectomy/Bilobectomy
White	Female	2004	Moderately differentiated; Grade II	IA	T1	N0	M0	None/Unknown	No/Unknown	134	Alive	76	Lobectomy/Bilobectomy
White	Male	2004	Moderately differentiated; Grade II	IA	T1	N0	M0	None/Unknown	No/Unknown	140	Alive	66	Lobectomy/Bilobectomy
White	Male	2004	Poorly differentiated; Grade III	IA	T1	N0	M0	None/Unknown	No/Unknown	22	Dead	66	Lobectomy/Bilobectomy
White	Male	2004	Moderately differentiated; Grade II	IA	T1	N0	M0	None/Unknown	No/Unknown	140	Alive	63	Lobectomy/Bilobectomy
White	Male	2004	Poorly differentiated; Grade III	IA	T1	N0	M0	None/Unknown	No/Unknown	142	Alive	68	Lobectomy/Bilobectomy
White	Male	2004	Poorly differentiated; Grade III	IA	T1	N0	M0	None/Unknown	No/Unknown	122	Alive	75	Lobectomy/Bilobectomy
White	Female	2004	Well differentiated; Grade I	IA	T1	N0	M0	None/Unknown	No/Unknown	13	Dead	87	Lobectomy/Bilobectomy
White	Male	2004	Poorly differentiated; Grade III	IA	T1	N0	M0	None/Unknown	No/Unknown	7	Dead	79	Lobectomy/Bilobectomy
White	Male	2004	Moderately differentiated; Grade II	IA	T1	N0	M0	None/Unknown	No/Unknown	12	Dead	80	Lobectomy/Bilobectomy
White	Female	2004	Poorly differentiated; Grade III	IA	T1	N0	M0	None/Unknown	No/Unknown	135	Alive	60	Lobectomy/Bilobectomy
White	Male	2004	Moderately differentiated; Grade II	IA	T1	N0	M0	None/Unknown	Yes	132	Alive	70	Lobectomy/Bilobectomy
White	Female	2004	Well differentiated; Grade I	IA	T1	N0	M0	None/Unknown	No/Unknown	134	Alive	70	Lobectomy/Bilobectomy
White	Female	2004	Poorly differentiated; Grade III	IA	T1	N0	M0	None/Unknown	No/Unknown	137	Alive	63	Lobectomy/Bilobectomy
White	Male	2004	Moderately differentiated; Grade II	IA	T1	N0	M0	None/Unknown	No/Unknown	0	Dead	70	Lobectomy/Bilobectomy
White	Female	2004	Poorly differentiated; Grade III	IA	T1	N0	M0	None/Unknown	No/Unknown	135	Alive	69	Lobectomy/Bilobectomy
White	Female	2004	Moderately differentiated; Grade II	IA	T1	N0	M0	None/Unknown	No/Unknown	38	Dead	77	Lobectomy/Bilobectomy
White	Female	2004	Poorly differentiated; Grade III	IA	T1	N0	M0	None/Unknown	No/Unknown	115	Dead	72	Lobectomy/Bilobectomy
White	Male	2004	Poorly differentiated; Grade III	IA	T1	N0	M0	None/Unknown	No/Unknown	136	Alive	62	Lobectomy/Bilobectomy
Black	Male	2004	Poorly differentiated; Grade III	IA	T1	N0	M0	None/Unknown	No/Unknown	33	Dead	72	Lobectomy/Bilobectomy
White	Male	2004	Moderately differentiated; Grade II	IA	T1	N0	M0	None/Unknown	No/Unknown	105	Dead	76	Lobectomy/Bilobectomy
White	Male	2004	Moderately differentiated; Grade II	IA	T1	N0	M0	None/Unknown	No/Unknown	49	Dead	80	Lobectomy/Bilobectomy
White	Female	2004	Poorly differentiated; Grade III	IA	T1	N0	M0	None/Unknown	No/Unknown	10	Dead	63	Lobectomy/Bilobectomy
White	Female	2004	Well differentiated; Grade I	IA	T1	N0	M0	None/Unknown	No/Unknown	127	Alive	74	Lobectomy/Bilobectomy
White	Male	2004	Unknown	IA	T1	N0	M0	None/Unknown	No/Unknown	63	Dead	42	Lobectomy/Bilobectomy
White	Male	2004	Moderately differentiated; Grade II	IA	T1	N0	M0	None/Unknown	No/Unknown	143	Alive	59	Lobectomy/Bilobectomy
White	Female	2004	Moderately differentiated; Grade II	IA	T1	N0	M0	None/Unknown	Yes	132	Alive	54	Lobectomy/Bilobectomy
White	Female	2004	Poorly differentiated; Grade III	IA	T1	N0	M0	None/Unknown	No/Unknown	96	Dead	76	Lobectomy/Bilobectomy
White	Male	2004	Moderately differentiated; Grade II	IA	T1	N0	M0	None/Unknown	No/Unknown	121	Dead	64	Lobectomy/Bilobectomy
Black	Male	2004	Moderately differentiated; Grade II	IA	T1	N0	M0	None/Unknown	No/Unknown	35	Dead	66	Lobectomy/Bilobectomy
White	Male	2004	Moderately differentiated; Grade II	IA	T1	N0	M0	None/Unknown	No/Unknown	137	Alive	61	Lobectomy/Bilobectomy
White	Male	2004	Moderately differentiated; Grade II	IA	T1	N0	M0	None/Unknown	No/Unknown	45	Dead	74	Lobectomy/Bilobectomy
White	Male	2004	Moderately differentiated; Grade II	IA	T1	N0	M0	None/Unknown	No/Unknown	99	Dead	80	Lobectomy/Bilobectomy
White	Male	2004	Moderately differentiated; Grade II	IA	T1	N0	M0	None/Unknown	No/Unknown	99	Dead	76	Lobectomy/Bilobectomy
White	Female	2004	Poorly differentiated; Grade III	IA	T1	N0	M0	None/Unknown	No/Unknown	36	Dead	57	Lobectomy/Bilobectomy
White	Female	2004	Moderately differentiated; Grade II	IA	T1	N0	M0	None/Unknown	No/Unknown	57	Dead	67	Lobectomy/Bilobectomy
Other (American Indian/AK Native, Asian/Pacific Islander)	Male	2004	Moderately differentiated; Grade II	IA	T1	N0	M0	None/Unknown	No/Unknown	141	Alive	71	Lobectomy/Bilobectomy
Black	Male	2004	Poorly differentiated; Grade III	IA	T1	N0	M0	None/Unknown	No/Unknown	43	Dead	63	Lobectomy/Bilobectomy
White	Male	2004	Moderately differentiated; Grade II	IA	T1	N0	M0	None/Unknown	No/Unknown	109	Dead	61	Lobectomy/Bilobectomy
Black	Female	2004	Well differentiated; Grade I	IA	T1	N0	M0	None/Unknown	Yes	26	Dead	56	Lobectomy/Bilobectomy
White	Male	2004	Moderately differentiated; Grade II	IA	T1	N0	M0	None/Unknown	No/Unknown	139	Alive	65	Lobectomy/Bilobectomy
Black	Male	2004	Poorly differentiated; Grade III	IA	T1	N0	M0	None/Unknown	No/Unknown	129	Alive	64	Lobectomy/Bilobectomy
White	Female	2004	Moderately differentiated; Grade II	IA	T1	N0	M0	None/Unknown	No/Unknown	128	Dead	60	Lobectomy/Bilobectomy
White	Female	2004	Unknown	IA	T1	N0	M0	None/Unknown	No/Unknown	142	Alive	59	Lobectomy/Bilobectomy
White	Female	2004	Moderately differentiated; Grade II	IA	T1	N0	M0	None/Unknown	No/Unknown	0	Dead	70	Lobectomy/Bilobectomy
White	Female	2004	Moderately differentiated; Grade II	IA	T1	N0	M0	None/Unknown	No/Unknown	142	Alive	76	Lobectomy/Bilobectomy
White	Female	2004	Moderately differentiated; Grade II	IA	T1	N0	M0	None/Unknown	No/Unknown	96	Dead	84	Lobectomy/Bilobectomy
White	Male	2004	Poorly differentiated; Grade III	IA	T1	N0	M0	None/Unknown	No/Unknown	117	Dead	43	Lobectomy/Bilobectomy
White	Female	2004	Poorly differentiated; Grade III	IA	T1	N0	M0	None/Unknown	No/Unknown	18	Dead	88	Lobectomy/Bilobectomy
White	Female	2004	Poorly differentiated; Grade III	IA	T1	N0	M0	None/Unknown	No/Unknown	125	Dead	50	Lobectomy/Bilobectomy
White	Female	2004	Poorly differentiated; Grade III	IA	T1	N0	M0	None/Unknown	No/Unknown	131	Dead	71	Lobectomy/Bilobectomy
White	Male	2004	Moderately differentiated; Grade II	IA	T1	N0	M0	None/Unknown	No/Unknown	39	Dead	67	Lobectomy/Bilobectomy
Black	Female	2004	Moderately differentiated; Grade II	IA	T1	N0	M0	None/Unknown	No/Unknown	103	Dead	57	Lobectomy/Bilobectomy
White	Male	2004	Well differentiated; Grade I	IA	T1	N0	M0	None/Unknown	No/Unknown	104	Dead	87	Lobectomy/Bilobectomy
White	Female	2004	Well differentiated; Grade I	IA	T1	N0	M0	None/Unknown	No/Unknown	79	Dead	66	Lobectomy/Bilobectomy
White	Male	2004	Undifferentiated; anaplastic; Grade IV	IA	T1	N0	M0	None/Unknown	No/Unknown	142	Alive	50	Lobectomy/Bilobectomy
Black	Female	2004	Poorly differentiated; Grade III	IA	T1	N0	M0	None/Unknown	No/Unknown	39	Dead	71	Lobectomy/Bilobectomy
White	Female	2004	Moderately differentiated; Grade II	IA	T1	N0	M0	None/Unknown	No/Unknown	43	Dead	75	Lobectomy/Bilobectomy
White	Male	2004	Moderately differentiated; Grade II	IA	T1	N0	M0	None/Unknown	No/Unknown	24	Dead	81	Lobectomy/Bilobectomy
White	Female	2004	Moderately differentiated; Grade II	IA	T1	N0	M0	None/Unknown	No/Unknown	48	Dead	58	Lobectomy/Bilobectomy
Black	Female	2004	Moderately differentiated; Grade II	IA	T1	N0	M0	None/Unknown	No/Unknown	80	Dead	67	Lobectomy/Bilobectomy
White	Male	2004	Moderately differentiated; Grade II	IA	T1	N0	M0	None/Unknown	No/Unknown	142	Alive	76	Lobectomy/Bilobectomy
White	Female	2004	Moderately differentiated; Grade II	IA	T1	N0	M0	None/Unknown	Yes	7	Alive	55	Lobectomy/Bilobectomy
White	Female	2004	Moderately differentiated; Grade II	IA	T1	N0	M0	None/Unknown	No/Unknown	110	Dead	61	Lobectomy/Bilobectomy
White	Male	2004	Poorly differentiated; Grade III	IA	T1	N0	M0	None/Unknown	No/Unknown	141	Alive	52	Lobectomy/Bilobectomy
White	Male	2004	Moderately differentiated; Grade II	IA	T1	N0	M0	None/Unknown	No/Unknown	88	Dead	58	Lobectomy/Bilobectomy
White	Male	2004	Poorly differentiated; Grade III	IA	T1	N0	M0	None/Unknown	No/Unknown	139	Alive	48	Lobectomy/Bilobectomy
White	Male	2004	Moderately differentiated; Grade II	IA	T1	N0	M0	None/Unknown	No/Unknown	23	Dead	69	Lobectomy/Bilobectomy
White	Male	2004	Moderately differentiated; Grade II	IA	T1	N0	M0	None/Unknown	No/Unknown	53	Dead	70	Lobectomy/Bilobectomy
White	Male	2004	Moderately differentiated; Grade II	IA	T1	N0	M0	None/Unknown	Yes	130	Dead	60	Lobectomy/Bilobectomy
Black	Female	2004	Moderately differentiated; Grade II	IA	T1	N0	M0	None/Unknown	No/Unknown	32	Dead	48	Lobectomy/Bilobectomy
White	Male	2004	Poorly differentiated; Grade III	IA	T1	N0	M0	None/Unknown	No/Unknown	101	Dead	76	Lobectomy/Bilobectomy
Black	Male	2004	Poorly differentiated; Grade III	IA	T1	N0	M0	None/Unknown	No/Unknown	141	Alive	64	Lobectomy/Bilobectomy
White	Male	2004	Moderately differentiated; Grade II	IA	T1	N0	M0	None/Unknown	No/Unknown	130	Dead	59	Lobectomy/Bilobectomy
White	Male	2004	Moderately differentiated; Grade II	IA	T1	N0	M0	None/Unknown	No/Unknown	140	Alive	53	Lobectomy/Bilobectomy
White	Male	2004	Moderately differentiated; Grade II	IA	T1	N0	M0	None/Unknown	No/Unknown	125	Dead	74	Lobectomy/Bilobectomy
White	Female	2004	Moderately differentiated; Grade II	IA	T1	N0	M0	None/Unknown	Yes	133	Alive	69	Lobectomy/Bilobectomy
White	Male	2004	Poorly differentiated; Grade III	IA	T1	N0	M0	None/Unknown	Yes	137	Alive	59	Lobectomy/Bilobectomy
White	Male	2004	Moderately differentiated; Grade II	IA	T1	N0	M0	None/Unknown	No/Unknown	15	Dead	75	Lobectomy/Bilobectomy
White	Male	2004	Poorly differentiated; Grade III	IA	T1	N0	M0	None/Unknown	No/Unknown	51	Dead	65	Lobectomy/Bilobectomy
White	Female	2004	Poorly differentiated; Grade III	IA	T1	N0	M0	None/Unknown	No/Unknown	94	Dead	74	Lobectomy/Bilobectomy
White	Male	2004	Poorly differentiated; Grade III	IA	T1	N0	M0	None/Unknown	No/Unknown	138	Alive	53	Lobectomy/Bilobectomy
White	Female	2004	Moderately differentiated; Grade II	IA	T1	N0	M0	None/Unknown	No/Unknown	134	Alive	65	Lobectomy/Bilobectomy
White	Female	2004	Well differentiated; Grade I	IA	T1	N0	M0	None/Unknown	No/Unknown	135	Alive	76	Lobectomy/Bilobectomy
White	Male	2004	Poorly differentiated; Grade III	IA	T1	N0	M0	None/Unknown	No/Unknown	104	Dead	74	Lobectomy/Bilobectomy
White	Female	2004	Poorly differentiated; Grade III	IA	T1	N0	M0	None/Unknown	No/Unknown	132	Alive	77	Lobectomy/Bilobectomy
White	Female	2004	Poorly differentiated; Grade III	IA	T1	N0	M0	None/Unknown	No/Unknown	95	Dead	77	Lobectomy/Bilobectomy
Black	Female	2004	Moderately differentiated; Grade II	IA	T1	N0	M0	None/Unknown	No/Unknown	127	Dead	75	Lobectomy/Bilobectomy
White	Female	2004	Moderately differentiated; Grade II	IA	T1	N0	M0	None/Unknown	No/Unknown	133	Alive	81	Lobectomy/Bilobectomy
White	Female	2004	Moderately differentiated; Grade II	IA	T1	N0	M0	None/Unknown	No/Unknown	100	Dead	67	Lobectomy/Bilobectomy
Other (American Indian/AK Native, Asian/Pacific Islander)	Female	2004	Moderately differentiated; Grade II	IA	T1	N0	M0	None/Unknown	No/Unknown	133	Alive	64	Lobectomy/Bilobectomy
White	Female	2004	Moderately differentiated; Grade II	IA	T1	N0	M0	None/Unknown	No/Unknown	136	Alive	59	Lobectomy/Bilobectomy
White	Female	2004	Moderately differentiated; Grade II	IA	T1	N0	M0	None/Unknown	No/Unknown	136	Alive	59	Lobectomy/Bilobectomy
White	Female	2004	Moderately differentiated; Grade II	IA	T1	N0	M0	None/Unknown	No/Unknown	75	Dead	78	Lobectomy/Bilobectomy
Black	Male	2004	Moderately differentiated; Grade II	IA	T1	N0	M0	None/Unknown	No/Unknown	132	Alive	58	Lobectomy/Bilobectomy
White	Female	2004	Well differentiated; Grade I	IA	T1	N0	M0	None/Unknown	No/Unknown	49	Dead	79	Lobectomy/Bilobectomy
White	Male	2004	Poorly differentiated; Grade III	IA	T1	N0	M0	None/Unknown	No/Unknown	40	Dead	82	Lobectomy/Bilobectomy
Black	Female	2004	Well differentiated; Grade I	IA	T1	N0	M0	None/Unknown	No/Unknown	89	Dead	66	Lobectomy/Bilobectomy
White	Female	2004	Moderately differentiated; Grade II	IA	T1	N0	M0	None/Unknown	No/Unknown	132	Alive	69	Lobectomy/Bilobectomy
White	Female	2004	Well differentiated; Grade I	IA	T1	N0	M0	Beam radiation	Yes	59	Dead	63	Lobectomy/Bilobectomy
White	Female	2004	Moderately differentiated; Grade II	IA	T1	N0	M0	None/Unknown	No/Unknown	132	Alive	43	Lobectomy/Bilobectomy
White	Female	2004	Unknown	IA	T1	N0	M0	None/Unknown	No/Unknown	143	Alive	70	Lobectomy/Bilobectomy
White	Male	2004	Poorly differentiated; Grade III	IA	T1	N0	M0	None/Unknown	No/Unknown	19	Dead	74	Lobectomy/Bilobectomy
White	Female	2004	Moderately differentiated; Grade II	IA	T1	N0	M0	None/Unknown	No/Unknown	38	Dead	53	Lobectomy/Bilobectomy
White	Female	2004	Unknown	IA	T1	N0	M0	None/Unknown	No/Unknown	134	Alive	76	Lobectomy/Bilobectomy
White	Female	2004	Moderately differentiated; Grade II	IA	T1	N0	M0	None/Unknown	No/Unknown	49	Dead	65	Lobectomy/Bilobectomy
White	Female	2004	Well differentiated; Grade I	IA	T1	N0	M0	None/Unknown	No/Unknown	132	Alive	65	Lobectomy/Bilobectomy
White	Female	2004	Moderately differentiated; Grade II	IA	T1	N0	M0	None/Unknown	No/Unknown	143	Alive	60	Lobectomy/Bilobectomy
White	Female	2004	Well differentiated; Grade I	IA	T1	N0	M0	None/Unknown	No/Unknown	118	Alive	74	Lobectomy/Bilobectomy
White	Male	2004	Poorly differentiated; Grade III	IA	T1	N0	M0	None/Unknown	No/Unknown	139	Alive	80	Lobectomy/Bilobectomy
White	Female	2004	Moderately differentiated; Grade II	IA	T1	N0	M0	None/Unknown	No/Unknown	138	Alive	57	Lobectomy/Bilobectomy
White	Male	2004	Moderately differentiated; Grade II	IA	T1	N0	M0	None/Unknown	No/Unknown	110	Dead	62	Lobectomy/Bilobectomy
White	Male	2004	Well differentiated; Grade I	IA	T1	N0	M0	None/Unknown	No/Unknown	121	Dead	71	Lobectomy/Bilobectomy
White	Female	2004	Moderately differentiated; Grade II	IA	T1	N0	M0	None/Unknown	No/Unknown	134	Alive	68	Lobectomy/Bilobectomy
White	Female	2004	Unknown	IA	T1	N0	M0	None/Unknown	No/Unknown	136	Alive	61	Lobectomy/Bilobectomy
White	Female	2004	Poorly differentiated; Grade III	IA	T1	N0	M0	None/Unknown	No/Unknown	140	Alive	65	Lobectomy/Bilobectomy
White	Female	2004	Moderately differentiated; Grade II	IA	T1	N0	M0	None/Unknown	No/Unknown	84	Dead	78	Lobectomy/Bilobectomy
White	Female	2004	Poorly differentiated; Grade III	IA	T1	N0	M0	None/Unknown	No/Unknown	121	Alive	41	Lobectomy/Bilobectomy
White	Male	2004	Moderately differentiated; Grade II	IA	T1	N0	M0	None/Unknown	No/Unknown	23	Dead	71	Lobectomy/Bilobectomy
White	Female	2004	Poorly differentiated; Grade III	IA	T1	N0	M0	Beam radiation	Yes	121	Dead	67	Lobectomy/Bilobectomy
White	Female	2004	Unknown	IA	T1	N0	M0	None/Unknown	No/Unknown	140	Alive	55	Lobectomy/Bilobectomy
Black	Female	2004	Poorly differentiated; Grade III	IA	T1	N0	M0	None/Unknown	No/Unknown	40	Dead	70	Lobectomy/Bilobectomy
White	Male	2004	Well differentiated; Grade I	IA	T1	N0	M0	None/Unknown	No/Unknown	56	Dead	79	Lobectomy/Bilobectomy
White	Female	2004	Well differentiated; Grade I	IA	T1	N0	M0	None/Unknown	No/Unknown	141	Alive	64	Lobectomy/Bilobectomy
White	Male	2004	Poorly differentiated; Grade III	IA	T1	N0	M0	None/Unknown	No/Unknown	11	Dead	50	Lobectomy/Bilobectomy
White	Female	2004	Well differentiated; Grade I	IA	T1	N0	M0	None/Unknown	No/Unknown	141	Alive	64	Lobectomy/Bilobectomy
White	Male	2004	Poorly differentiated; Grade III	IA	T1	N0	M0	None/Unknown	Yes	123	Dead	64	Lobectomy/Bilobectomy
White	Male	2004	Moderately differentiated; Grade II	IA	T1	N0	M0	None/Unknown	No/Unknown	92	Dead	66	Lobectomy/Bilobectomy
White	Female	2004	Moderately differentiated; Grade II	IA	T1	N0	M0	None/Unknown	No/Unknown	141	Alive	67	Lobectomy/Bilobectomy
White	Male	2004	Poorly differentiated; Grade III	IA	T1	N0	M0	None/Unknown	No/Unknown	32	Dead	58	Lobectomy/Bilobectomy
White	Female	2004	Poorly differentiated; Grade III	IA	T1	N0	M0	None/Unknown	No/Unknown	141	Alive	55	Lobectomy/Bilobectomy
White	Female	2004	Poorly differentiated; Grade III	IA	T1	N0	M0	None/Unknown	No/Unknown	0	Dead	72	Lobectomy/Bilobectomy
White	Female	2004	Moderately differentiated; Grade II	IA	T1	N0	M0	None/Unknown	No/Unknown	126	Dead	61	Lobectomy/Bilobectomy
White	Male	2004	Poorly differentiated; Grade III	IA	T1	N0	M0	None/Unknown	No/Unknown	7	Dead	73	Lobectomy/Bilobectomy
White	Male	2004	Poorly differentiated; Grade III	IA	T1	N0	M0	None/Unknown	No/Unknown	117	Dead	63	Lobectomy/Bilobectomy
White	Female	2004	Moderately differentiated; Grade II	IA	T1	N0	M0	None/Unknown	No/Unknown	137	Dead	58	Lobectomy/Bilobectomy
White	Male	2004	Moderately differentiated; Grade II	IA	T1	N0	M0	None/Unknown	No/Unknown	121	Alive	56	Lobectomy/Bilobectomy
White	Male	2004	Moderately differentiated; Grade II	IA	T1	N0	M0	None/Unknown	No/Unknown	96	Dead	73	Lobectomy/Bilobectomy
White	Female	2004	Moderately differentiated; Grade II	IA	T1	N0	M0	None/Unknown	No/Unknown	70	Alive	52	Lobectomy/Bilobectomy
White	Male	2004	Poorly differentiated; Grade III	IA	T1	N0	M0	None/Unknown	No/Unknown	12	Dead	79	Lobectomy/Bilobectomy
White	Male	2004	Poorly differentiated; Grade III	IA	T1	N0	M0	None/Unknown	No/Unknown	95	Dead	53	Lobectomy/Bilobectomy
White	Female	2004	Poorly differentiated; Grade III	IA	T1	N0	M0	None/Unknown	No/Unknown	97	Dead	63	Lobectomy/Bilobectomy
White	Female	2004	Undifferentiated; anaplastic; Grade IV	IA	T1	N0	M0	None/Unknown	No/Unknown	135	Alive	58	Lobectomy/Bilobectomy
White	Female	2004	Moderately differentiated; Grade II	IA	T1	N0	M0	None/Unknown	No/Unknown	139	Alive	78	Lobectomy/Bilobectomy
White	Female	2004	Well differentiated; Grade I	IA	T1	N0	M0	None/Unknown	No/Unknown	112	Dead	84	Lobectomy/Bilobectomy
White	Male	2004	Moderately differentiated; Grade II	IA	T1	N0	M0	None/Unknown	Yes	32	Dead	64	Lobectomy/Bilobectomy
White	Female	2004	Well differentiated; Grade I	IA	T1	N0	M0	None/Unknown	No/Unknown	135	Alive	74	Lobectomy/Bilobectomy
White	Male	2004	Poorly differentiated; Grade III	IA	T1	N0	M0	None/Unknown	No/Unknown	2	Dead	71	Lobectomy/Bilobectomy
Black	Female	2004	Moderately differentiated; Grade II	IA	T1	N0	M0	None/Unknown	No/Unknown	138	Alive	62	Lobectomy/Bilobectomy
White	Female	2004	Moderately differentiated; Grade II	IA	T1	N0	M0	None/Unknown	No/Unknown	119	Dead	72	Lobectomy/Bilobectomy
White	Female	2004	Well differentiated; Grade I	IA	T1	N0	M0	None/Unknown	No/Unknown	133	Alive	65	Lobectomy/Bilobectomy
White	Male	2004	Poorly differentiated; Grade III	IA	T1	N0	M0	None/Unknown	No/Unknown	138	Alive	65	Lobectomy/Bilobectomy
Black	Male	2004	Poorly differentiated; Grade III	IA	T1	N0	M0	None/Unknown	No/Unknown	18	Dead	73	Lobectomy/Bilobectomy
White	Male	2004	Moderately differentiated; Grade II	IA	T1	N0	M0	None/Unknown	No/Unknown	135	Alive	74	Lobectomy/Bilobectomy
White	Female	2004	Moderately differentiated; Grade II	IA	T1	N0	M0	None/Unknown	No/Unknown	137	Alive	65	Lobectomy/Bilobectomy
White	Female	2004	Moderately differentiated; Grade II	IA	T1	N0	M0	None/Unknown	No/Unknown	54	Dead	59	Lobectomy/Bilobectomy
Black	Female	2004	Well differentiated; Grade I	IA	T1	N0	M0	None/Unknown	No/Unknown	132	Alive	51	Lobectomy/Bilobectomy
White	Female	2004	Moderately differentiated; Grade II	IA	T1	N0	M0	None/Unknown	No/Unknown	4	Dead	72	Lobectomy/Bilobectomy
White	Female	2004	Well differentiated; Grade I	IA	T1	N0	M0	None/Unknown	No/Unknown	109	Alive	60	Lobectomy/Bilobectomy
White	Male	2004	Poorly differentiated; Grade III	IA	T1	N0	M0	None/Unknown	No/Unknown	138	Alive	76	Lobectomy/Bilobectomy
Black	Male	2004	Poorly differentiated; Grade III	IA	T1	N0	M0	None/Unknown	No/Unknown	46	Dead	79	Lobectomy/Bilobectomy
White	Male	2004	Well differentiated; Grade I	IA	T1	N0	M0	None/Unknown	No/Unknown	134	Alive	74	Lobectomy/Bilobectomy
White	Male	2004	Moderately differentiated; Grade II	IA	T1	N0	M0	None/Unknown	No/Unknown	32	Dead	71	Lobectomy/Bilobectomy
White	Male	2004	Poorly differentiated; Grade III	IA	T1	N0	M0	None/Unknown	No/Unknown	18	Dead	59	Lobectomy/Bilobectomy
White	Female	2004	Poorly differentiated; Grade III	IA	T1	N0	M0	None/Unknown	No/Unknown	0	Dead	68	Lobectomy/Bilobectomy
White	Male	2004	Moderately differentiated; Grade II	IA	T1	N0	M0	None/Unknown	No/Unknown	72	Dead	65	Lobectomy/Bilobectomy
White	Female	2004	Well differentiated; Grade I	IA	T1	N0	M0	None/Unknown	No/Unknown	133	Dead	68	Lobectomy/Bilobectomy
Black	Female	2004	Well differentiated; Grade I	IA	T1	N0	M0	None/Unknown	No/Unknown	86	Dead	64	Lobectomy/Bilobectomy
White	Male	2004	Moderately differentiated; Grade II	IA	T1	N0	M0	None/Unknown	No/Unknown	112	Dead	59	Lobectomy/Bilobectomy
White	Female	2004	Moderately differentiated; Grade II	IA	T1	N0	M0	None/Unknown	No/Unknown	60	Dead	40	Lobectomy/Bilobectomy
White	Male	2004	Moderately differentiated; Grade II	IA	T1	N0	M0	None/Unknown	No/Unknown	12	Dead	78	Lobectomy/Bilobectomy
White	Male	2004	Well differentiated; Grade I	IA	T1	N0	M0	None/Unknown	No/Unknown	132	Alive	41	Lobectomy/Bilobectomy
White	Female	2004	Moderately differentiated; Grade II	IA	T1	N0	M0	None/Unknown	No/Unknown	135	Alive	47	Lobectomy/Bilobectomy
White	Male	2004	Moderately differentiated; Grade II	IA	T1	N0	M0	None/Unknown	No/Unknown	83	Dead	70	Lobectomy/Bilobectomy
White	Female	2004	Poorly differentiated; Grade III	IA	T1	N0	M0	None/Unknown	No/Unknown	132	Alive	57	Lobectomy/Bilobectomy
White	Male	2004	Moderately differentiated; Grade II	IA	T1	N0	M0	None/Unknown	No/Unknown	138	Alive	74	Lobectomy/Bilobectomy
Other (American Indian/AK Native, Asian/Pacific Islander)	Male	2004	Poorly differentiated; Grade III	IA	T1	N0	M0	None/Unknown	No/Unknown	135	Alive	44	Lobectomy/Bilobectomy
White	Male	2004	Poorly differentiated; Grade III	IA	T1	N0	M0	None/Unknown	No/Unknown	133	Alive	82	Lobectomy/Bilobectomy
White	Male	2004	Poorly differentiated; Grade III	IA	T1	N0	M0	None/Unknown	Yes	25	Dead	75	Lobectomy/Bilobectomy
White	Female	2004	Poorly differentiated; Grade III	IA	T1	N0	M0	None/Unknown	Yes	133	Alive	57	Lobectomy/Bilobectomy
White	Male	2004	Poorly differentiated; Grade III	IA	T1	N0	M0	None/Unknown	No/Unknown	68	Dead	57	Lobectomy/Bilobectomy
White	Female	2004	Moderately differentiated; Grade II	IA	T1	N0	M0	None/Unknown	No/Unknown	112	Dead	74	Lobectomy/Bilobectomy
White	Female	2004	Moderately differentiated; Grade II	IA	T1	N0	M0	None/Unknown	No/Unknown	73	Dead	73	Lobectomy/Bilobectomy
White	Male	2004	Moderately differentiated; Grade II	IA	T1	N0	M0	None/Unknown	Yes	125	Dead	75	Lobectomy/Bilobectomy
White	Female	2004	Moderately differentiated; Grade II	IA	T1	N0	M0	None/Unknown	No/Unknown	100	Alive	65	Lobectomy/Bilobectomy
White	Male	2004	Moderately differentiated; Grade II	IA	T1	N0	M0	None/Unknown	No/Unknown	134	Alive	79	Lobectomy/Bilobectomy
White	Female	2004	Poorly differentiated; Grade III	IA	T1	N0	M0	None/Unknown	No/Unknown	134	Alive	62	Lobectomy/Bilobectomy
White	Female	2004	Poorly differentiated; Grade III	IA	T1	N0	M0	None/Unknown	No/Unknown	85	Dead	67	Lobectomy/Bilobectomy
White	Female	2004	Moderately differentiated; Grade II	IA	T1	N0	M0	None/Unknown	No/Unknown	133	Alive	66	Lobectomy/Bilobectomy
White	Female	2004	Poorly differentiated; Grade III	IA	T1	N0	M0	None/Unknown	No/Unknown	51	Dead	61	Lobectomy/Bilobectomy
White	Male	2004	Well differentiated; Grade I	IA	T1	N0	M0	None/Unknown	No/Unknown	136	Alive	55	Lobectomy/Bilobectomy
Black	Male	2004	Poorly differentiated; Grade III	IA	T1	N0	M0	None/Unknown	No/Unknown	41	Dead	60	Lobectomy/Bilobectomy
Black	Male	2004	Moderately differentiated; Grade II	IA	T1	N0	M0	None/Unknown	No/Unknown	85	Dead	59	Lobectomy/Bilobectomy
Black	Male	2004	Unknown	IA	T1	N0	M0	None/Unknown	No/Unknown	36	Dead	66	Lobectomy/Bilobectomy
Black	Male	2005	Moderately differentiated; Grade II	IA	T1	N0	M0	None/Unknown	Yes	65	Dead	71	Lobectomy/Bilobectomy
Other (American Indian/AK Native, Asian/Pacific Islander)	Male	2005	Moderately differentiated; Grade II	IA	T1	N0	M0	None/Unknown	Yes	83	Dead	64	Lobectomy/Bilobectomy
Other (American Indian/AK Native, Asian/Pacific Islander)	Male	2005	Poorly differentiated; Grade III	IA	T1	N0	M0	None/Unknown	No/Unknown	42	Dead	71	Lobectomy/Bilobectomy
Other (American Indian/AK Native, Asian/Pacific Islander)	Female	2005	Moderately differentiated; Grade II	IA	T1	N0	M0	Beam radiation	Yes	124	Alive	58	Lobectomy/Bilobectomy
White	Female	2005	Moderately differentiated; Grade II	IA	T1	N0	M0	None/Unknown	No/Unknown	125	Alive	65	Lobectomy/Bilobectomy
Other (American Indian/AK Native, Asian/Pacific Islander)	Female	2005	Moderately differentiated; Grade II	IA	T1	N0	M0	None/Unknown	No/Unknown	52	Dead	70	Lobectomy/Bilobectomy
Black	Male	2005	Moderately differentiated; Grade II	IA	T1	N0	M0	None/Unknown	No/Unknown	93	Dead	74	Lobectomy/Bilobectomy
Other (American Indian/AK Native, Asian/Pacific Islander)	Male	2005	Moderately differentiated; Grade II	IA	T1	N0	M0	None/Unknown	No/Unknown	29	Dead	60	Lobectomy/Bilobectomy
Black	Male	2005	Poorly differentiated; Grade III	IA	T1	N0	M0	Beam radiation	No/Unknown	7	Dead	66	Lobectomy/Bilobectomy
White	Male	2005	Moderately differentiated; Grade II	IA	T1	N0	M0	None/Unknown	No/Unknown	127	Alive	60	Lobectomy/Bilobectomy
Other (American Indian/AK Native, Asian/Pacific Islander)	Male	2005	Moderately differentiated; Grade II	IA	T1	N0	M0	None/Unknown	No/Unknown	44	Dead	82	Lobectomy/Bilobectomy
White	Female	2005	Poorly differentiated; Grade III	IA	T1	N0	M0	None/Unknown	No/Unknown	123	Alive	65	Lobectomy/Bilobectomy
White	Female	2005	Moderately differentiated; Grade II	IA	T1	N0	M0	None/Unknown	No/Unknown	65	Dead	67	Lobectomy/Bilobectomy
White	Female	2005	Poorly differentiated; Grade III	IA	T1	N0	M0	None/Unknown	No/Unknown	85	Alive	63	Lobectomy/Bilobectomy
White	Female	2005	Well differentiated; Grade I	IA	T1	N0	M0	None/Unknown	No/Unknown	131	Alive	68	Lobectomy/Bilobectomy
Other (American Indian/AK Native, Asian/Pacific Islander)	Male	2005	Moderately differentiated; Grade II	IA	T1	N0	M0	None/Unknown	No/Unknown	122	Dead	71	Lobectomy/Bilobectomy
White	Female	2005	Moderately differentiated; Grade II	IA	T1	N0	M0	None/Unknown	No/Unknown	70	Dead	76	Lobectomy/Bilobectomy
White	Male	2005	Poorly differentiated; Grade III	IA	T1	N0	M0	None/Unknown	No/Unknown	125	Alive	63	Lobectomy/Bilobectomy
Other (American Indian/AK Native, Asian/Pacific Islander)	Female	2005	Poorly differentiated; Grade III	IA	T1	N0	M0	Beam radiation	No/Unknown	121	Alive	47	Lobectomy/Bilobectomy
White	Male	2005	Moderately differentiated; Grade II	IA	T1	N0	M0	None/Unknown	No/Unknown	0	Dead	65	Lobectomy/Bilobectomy
Black	Female	2005	Moderately differentiated; Grade II	IA	T1	N0	M0	None/Unknown	No/Unknown	75	Dead	81	Lobectomy/Bilobectomy
White	Female	2005	Moderately differentiated; Grade II	IA	T1	N0	M0	None/Unknown	No/Unknown	120	Dead	72	Lobectomy/Bilobectomy
White	Male	2005	Moderately differentiated; Grade II	IA	T1	N0	M0	None/Unknown	No/Unknown	48	Dead	65	Lobectomy/Bilobectomy
Other (American Indian/AK Native, Asian/Pacific Islander)	Female	2005	Moderately differentiated; Grade II	IA	T1	N0	M0	None/Unknown	No/Unknown	99	Dead	58	Lobectomy/Bilobectomy
Black	Female	2005	Well differentiated; Grade I	IA	T1	N0	M0	None/Unknown	No/Unknown	56	Dead	81	Lobectomy/Bilobectomy
White	Female	2005	Moderately differentiated; Grade II	IA	T1	N0	M0	None/Unknown	No/Unknown	121	Alive	59	Lobectomy/Bilobectomy
Other (American Indian/AK Native, Asian/Pacific Islander)	Female	2005	Unknown	IA	T1	N0	M0	Beam radiation	Yes	61	Dead	67	Lobectomy/Bilobectomy
White	Female	2005	Moderately differentiated; Grade II	IA	T1	N0	M0	None/Unknown	No/Unknown	67	Dead	60	Lobectomy/Bilobectomy
Other (American Indian/AK Native, Asian/Pacific Islander)	Female	2005	Poorly differentiated; Grade III	IA	T1	N0	M0	None/Unknown	No/Unknown	3	Alive	60	Lobectomy/Bilobectomy
White	Female	2005	Poorly differentiated; Grade III	IA	T1	N0	M0	None/Unknown	No/Unknown	129	Alive	69	Lobectomy/Bilobectomy
White	Male	2005	Poorly differentiated; Grade III	IA	T1	N0	M0	None/Unknown	No/Unknown	31	Dead	75	Lobectomy/Bilobectomy
White	Male	2005	Moderately differentiated; Grade II	IA	T1	N0	M0	None/Unknown	No/Unknown	123	Alive	70	Lobectomy/Bilobectomy
White	Female	2005	Poorly differentiated; Grade III	IA	T1	N0	M0	None/Unknown	No/Unknown	121	Alive	70	Lobectomy/Bilobectomy
White	Male	2005	Poorly differentiated; Grade III	IA	T1	N0	M0	None/Unknown	No/Unknown	33	Dead	82	Lobectomy/Bilobectomy
White	Female	2005	Poorly differentiated; Grade III	IA	T1	N0	M0	None/Unknown	No/Unknown	128	Alive	76	Lobectomy/Bilobectomy
White	Female	2005	Poorly differentiated; Grade III	IA	T1	N0	M0	None/Unknown	No/Unknown	125	Alive	41	Lobectomy/Bilobectomy
White	Female	2005	Moderately differentiated; Grade II	IA	T1	N0	M0	None/Unknown	No/Unknown	130	Alive	80	Lobectomy/Bilobectomy
White	Male	2005	Poorly differentiated; Grade III	IA	T1	N0	M0	None/Unknown	No/Unknown	34	Dead	73	Lobectomy/Bilobectomy
White	Male	2005	Poorly differentiated; Grade III	IA	T1	N0	M0	None/Unknown	No/Unknown	4	Dead	79	Lobectomy/Bilobectomy
White	Male	2005	Moderately differentiated; Grade II	IA	T1	N0	M0	None/Unknown	No/Unknown	15	Dead	67	Lobectomy/Bilobectomy
White	Female	2005	Well differentiated; Grade I	IA	T1	N0	M0	None/Unknown	No/Unknown	120	Alive	61	Lobectomy/Bilobectomy
White	Female	2005	Poorly differentiated; Grade III	IA	T1	N0	M0	None/Unknown	No/Unknown	131	Alive	64	Lobectomy/Bilobectomy
White	Male	2005	Moderately differentiated; Grade II	IA	T1	N0	M0	None/Unknown	No/Unknown	73	Dead	59	Lobectomy/Bilobectomy
White	Female	2005	Moderately differentiated; Grade II	IA	T1	N0	M0	None/Unknown	No/Unknown	16	Dead	73	Lobectomy/Bilobectomy
White	Female	2005	Well differentiated; Grade I	IA	T1	N0	M0	None/Unknown	No/Unknown	128	Alive	62	Lobectomy/Bilobectomy
White	Male	2005	Moderately differentiated; Grade II	IA	T1	N0	M0	None/Unknown	No/Unknown	128	Alive	73	Lobectomy/Bilobectomy
White	Female	2005	Moderately differentiated; Grade II	IA	T1	N0	M0	None/Unknown	No/Unknown	129	Alive	59	Lobectomy/Bilobectomy
White	Male	2005	Well differentiated; Grade I	IA	T1	N0	M0	None/Unknown	No/Unknown	13	Dead	79	Lobectomy/Bilobectomy
White	Female	2005	Well differentiated; Grade I	IA	T1	N0	M0	None/Unknown	No/Unknown	66	Dead	88	Lobectomy/Bilobectomy
White	Female	2005	Well differentiated; Grade I	IA	T1	N0	M0	None/Unknown	No/Unknown	126	Alive	62	Lobectomy/Bilobectomy
White	Female	2005	Moderately differentiated; Grade II	IA	T1	N0	M0	None/Unknown	No/Unknown	129	Alive	64	Lobectomy/Bilobectomy
White	Female	2005	Moderately differentiated; Grade II	IA	T1	N0	M0	None/Unknown	No/Unknown	22	Dead	81	Lobectomy/Bilobectomy
White	Female	2005	Moderately differentiated; Grade II	IA	T1	N0	M0	None/Unknown	No/Unknown	131	Alive	67	Lobectomy/Bilobectomy
White	Male	2005	Well differentiated; Grade I	IA	T1	N0	M0	None/Unknown	No/Unknown	128	Alive	53	Lobectomy/Bilobectomy
White	Male	2005	Moderately differentiated; Grade II	IA	T1	N0	M0	None/Unknown	No/Unknown	89	Dead	63	Lobectomy/Bilobectomy
White	Male	2005	Moderately differentiated; Grade II	IA	T1	N0	M0	None/Unknown	No/Unknown	126	Alive	62	Lobectomy/Bilobectomy
White	Male	2005	Moderately differentiated; Grade II	IA	T1	N0	M0	None/Unknown	No/Unknown	66	Dead	57	Lobectomy/Bilobectomy
White	Female	2005	Unknown	IA	T1	N0	M0	Beam radiation	Yes	39	Dead	74	Lobectomy/Bilobectomy
White	Male	2005	Moderately differentiated; Grade II	IA	T1	N0	M0	None/Unknown	No/Unknown	28	Dead	65	Lobectomy/Bilobectomy
White	Female	2005	Moderately differentiated; Grade II	IA	T1	N0	M0	None/Unknown	No/Unknown	83	Dead	72	Lobectomy/Bilobectomy
White	Female	2005	Poorly differentiated; Grade III	IA	T1	N0	M0	None/Unknown	No/Unknown	116	Dead	76	Lobectomy/Bilobectomy
White	Female	2005	Unknown	IA	T1	N0	M0	None/Unknown	No/Unknown	125	Alive	52	Lobectomy/Bilobectomy
White	Female	2005	Well differentiated; Grade I	IA	T1	N0	M0	None/Unknown	No/Unknown	125	Alive	61	Lobectomy/Bilobectomy
White	Male	2005	Moderately differentiated; Grade II	IA	T1	N0	M0	None/Unknown	No/Unknown	130	Alive	74	Lobectomy/Bilobectomy
White	Male	2005	Well differentiated; Grade I	IA	T1	N0	M0	None/Unknown	No/Unknown	126	Alive	58	Lobectomy/Bilobectomy
White	Male	2005	Poorly differentiated; Grade III	IA	T1	N0	M0	None/Unknown	No/Unknown	112	Dead	64	Lobectomy/Bilobectomy
White	Female	2005	Unknown	IA	T1	N0	M0	None/Unknown	No/Unknown	130	Alive	80	Lobectomy/Bilobectomy
White	Female	2005	Poorly differentiated; Grade III	IA	T1	N0	M0	None/Unknown	No/Unknown	122	Alive	57	Lobectomy/Bilobectomy
White	Male	2005	Poorly differentiated; Grade III	IA	T1	N0	M0	None/Unknown	No/Unknown	21	Dead	76	Lobectomy/Bilobectomy
White	Female	2005	Moderately differentiated; Grade II	IA	T1	N0	M0	None/Unknown	No/Unknown	50	Dead	83	Lobectomy/Bilobectomy
White	Female	2005	Moderately differentiated; Grade II	IA	T1	N0	M0	None/Unknown	No/Unknown	126	Alive	68	Lobectomy/Bilobectomy
White	Female	2005	Moderately differentiated; Grade II	IA	T1	N0	M0	None/Unknown	No/Unknown	92	Dead	61	Lobectomy/Bilobectomy
White	Female	2005	Well differentiated; Grade I	IA	T1	N0	M0	None/Unknown	No/Unknown	119	Dead	84	Lobectomy/Bilobectomy
White	Female	2005	Well differentiated; Grade I	IA	T1	N0	M0	None/Unknown	No/Unknown	128	Alive	71	Lobectomy/Bilobectomy
White	Female	2005	Moderately differentiated; Grade II	IA	T1	N0	M0	None/Unknown	No/Unknown	34	Dead	68	Lobectomy/Bilobectomy
White	Male	2005	Moderately differentiated; Grade II	IA	T1	N0	M0	None/Unknown	No/Unknown	130	Alive	49	Lobectomy/Bilobectomy
White	Female	2005	Moderately differentiated; Grade II	IA	T1	N0	M0	None/Unknown	No/Unknown	74	Dead	61	Lobectomy/Bilobectomy
White	Female	2005	Poorly differentiated; Grade III	IA	T1	N0	M0	None/Unknown	No/Unknown	125	Alive	83	Lobectomy/Bilobectomy
White	Male	2005	Moderately differentiated; Grade II	IA	T1	N0	M0	None/Unknown	No/Unknown	79	Dead	64	Lobectomy/Bilobectomy
White	Female	2005	Well differentiated; Grade I	IA	T1	N0	M0	None/Unknown	No/Unknown	2	Dead	72	Lobectomy/Bilobectomy
White	Female	2005	Well differentiated; Grade I	IA	T1	N0	M0	None/Unknown	No/Unknown	127	Alive	59	Lobectomy/Bilobectomy
White	Female	2005	Poorly differentiated; Grade III	IA	T1	N0	M0	None/Unknown	No/Unknown	66	Dead	78	Lobectomy/Bilobectomy
White	Male	2005	Moderately differentiated; Grade II	IA	T1	N0	M0	None/Unknown	No/Unknown	63	Dead	77	Lobectomy/Bilobectomy
White	Male	2005	Well differentiated; Grade I	IA	T1	N0	M0	None/Unknown	No/Unknown	108	Dead	75	Lobectomy/Bilobectomy
White	Male	2005	Moderately differentiated; Grade II	IA	T1	N0	M0	None/Unknown	No/Unknown	13	Dead	63	Lobectomy/Bilobectomy
White	Female	2005	Moderately differentiated; Grade II	IA	T1	N0	M0	None/Unknown	No/Unknown	130	Alive	61	Lobectomy/Bilobectomy
White	Female	2005	Poorly differentiated; Grade III	IA	T1	N0	M0	None/Unknown	No/Unknown	49	Dead	86	Lobectomy/Bilobectomy
White	Female	2005	Moderately differentiated; Grade II	IA	T1	N0	M0	None/Unknown	No/Unknown	90	Dead	63	Lobectomy/Bilobectomy
White	Female	2005	Moderately differentiated; Grade II	IA	T1	N0	M0	None/Unknown	No/Unknown	86	Dead	63	Lobectomy/Bilobectomy
White	Female	2005	Moderately differentiated; Grade II	IA	T1	N0	M0	None/Unknown	No/Unknown	72	Dead	73	Lobectomy/Bilobectomy
White	Male	2005	Well differentiated; Grade I	IA	T1	N0	M0	None/Unknown	No/Unknown	30	Dead	56	Lobectomy/Bilobectomy
White	Female	2005	Well differentiated; Grade I	IA	T1	N0	M0	None/Unknown	No/Unknown	51	Dead	82	Lobectomy/Bilobectomy
Black	Male	2005	Well differentiated; Grade I	IA	T1	N0	M0	None/Unknown	Yes	130	Alive	71	Lobectomy/Bilobectomy
White	Male	2005	Moderately differentiated; Grade II	IA	T1	N0	M0	None/Unknown	No/Unknown	38	Dead	73	Lobectomy/Bilobectomy
White	Female	2005	Moderately differentiated; Grade II	IA	T1	N0	M0	None/Unknown	No/Unknown	82	Dead	77	Lobectomy/Bilobectomy
White	Female	2005	Moderately differentiated; Grade II	IA	T1	N0	M0	None/Unknown	No/Unknown	117	Dead	70	Lobectomy/Bilobectomy
White	Female	2005	Well differentiated; Grade I	IA	T1	N0	M0	None/Unknown	No/Unknown	80	Dead	79	Lobectomy/Bilobectomy
White	Female	2005	Moderately differentiated; Grade II	IA	T1	N0	M0	None/Unknown	No/Unknown	126	Alive	83	Lobectomy/Bilobectomy
White	Female	2005	Moderately differentiated; Grade II	IA	T1	N0	M0	None/Unknown	No/Unknown	13	Dead	66	Lobectomy/Bilobectomy
White	Female	2005	Moderately differentiated; Grade II	IA	T1	N0	M0	None/Unknown	No/Unknown	129	Alive	53	Lobectomy/Bilobectomy
Black	Female	2005	Moderately differentiated; Grade II	IA	T1	N0	M0	None/Unknown	Yes	31	Dead	63	Lobectomy/Bilobectomy
White	Female	2005	Well differentiated; Grade I	IA	T1	N0	M0	None/Unknown	No/Unknown	40	Dead	83	Lobectomy/Bilobectomy
White	Female	2005	Moderately differentiated; Grade II	IA	T1	N0	M0	None/Unknown	No/Unknown	19	Dead	73	Lobectomy/Bilobectomy
White	Male	2005	Moderately differentiated; Grade II	IA	T1	N0	M0	None/Unknown	No/Unknown	113	Dead	70	Lobectomy/Bilobectomy
White	Female	2005	Moderately differentiated; Grade II	IA	T1	N0	M0	None/Unknown	No/Unknown	89	Dead	77	Lobectomy/Bilobectomy
Black	Male	2005	Poorly differentiated; Grade III	IA	T1	N0	M0	None/Unknown	No/Unknown	0	Dead	75	Lobectomy/Bilobectomy
Black	Female	2005	Poorly differentiated; Grade III	IA	T1	N0	M0	None/Unknown	No/Unknown	72	Dead	59	Lobectomy/Bilobectomy
White	Female	2005	Moderately differentiated; Grade II	IA	T1	N0	M0	None/Unknown	No/Unknown	107	Dead	73	Lobectomy/Bilobectomy
Black	Female	2005	Moderately differentiated; Grade II	IA	T1	N0	M0	None/Unknown	No/Unknown	1	Dead	72	Lobectomy/Bilobectomy
White	Male	2005	Moderately differentiated; Grade II	IA	T1	N0	M0	None/Unknown	No/Unknown	54	Dead	77	Lobectomy/Bilobectomy
Black	Female	2005	Moderately differentiated; Grade II	IA	T1	N0	M0	None/Unknown	No/Unknown	95	Dead	48	Lobectomy/Bilobectomy
White	Male	2005	Moderately differentiated; Grade II	IA	T1	N0	M0	None/Unknown	No/Unknown	123	Alive	65	Lobectomy/Bilobectomy
White	Male	2005	Unknown	IA	T1	N0	M0	None/Unknown	Yes	16	Dead	66	Lobectomy/Bilobectomy
White	Female	2005	Moderately differentiated; Grade II	IA	T1	N0	M0	None/Unknown	Yes	39	Dead	61	Lobectomy/Bilobectomy
Other (American Indian/AK Native, Asian/Pacific Islander)	Female	2005	Moderately differentiated; Grade II	IA	T1	N0	M0	None/Unknown	No/Unknown	68	Dead	77	Lobectomy/Bilobectomy
White	Male	2005	Moderately differentiated; Grade II	IA	T1	N0	M0	None/Unknown	No/Unknown	122	Alive	57	Lobectomy/Bilobectomy
White	Female	2005	Moderately differentiated; Grade II	IA	T1	N0	M0	None/Unknown	No/Unknown	82	Dead	72	Lobectomy/Bilobectomy
White	Female	2005	Moderately differentiated; Grade II	IA	T1	N0	M0	None/Unknown	No/Unknown	121	Alive	62	Lobectomy/Bilobectomy
White	Male	2005	Well differentiated; Grade I	IA	T1	N0	M0	None/Unknown	No/Unknown	8	Dead	85	Lobectomy/Bilobectomy
White	Male	2005	Unknown	IA	T1	N0	M0	None/Unknown	No/Unknown	75	Dead	82	Lobectomy/Bilobectomy
Black	Female	2005	Poorly differentiated; Grade III	IA	T1	N0	M0	None/Unknown	No/Unknown	130	Alive	45	Lobectomy/Bilobectomy
White	Female	2005	Moderately differentiated; Grade II	IA	T1	N0	M0	None/Unknown	No/Unknown	130	Alive	59	Lobectomy/Bilobectomy
White	Female	2005	Moderately differentiated; Grade II	IA	T1	N0	M0	None/Unknown	No/Unknown	128	Alive	68	Lobectomy/Bilobectomy
White	Female	2005	Well differentiated; Grade I	IA	T1	N0	M0	None/Unknown	No/Unknown	127	Alive	64	Lobectomy/Bilobectomy
White	Female	2005	Well differentiated; Grade I	IA	T1	N0	M0	None/Unknown	No/Unknown	121	Alive	61	Lobectomy/Bilobectomy
White	Female	2005	Moderately differentiated; Grade II	IA	T1	N0	M0	None/Unknown	No/Unknown	43	Dead	58	Lobectomy/Bilobectomy
White	Female	2005	Poorly differentiated; Grade III	IA	T1	N0	M0	None/Unknown	No/Unknown	65	Dead	77	Lobectomy/Bilobectomy
White	Female	2005	Poorly differentiated; Grade III	IA	T1	N0	M0	None/Unknown	Yes	121	Alive	50	Lobectomy/Bilobectomy
Black	Female	2005	Well differentiated; Grade I	IA	T1	N0	M0	None/Unknown	No/Unknown	130	Alive	55	Lobectomy/Bilobectomy
White	Male	2005	Moderately differentiated; Grade II	IA	T1	N0	M0	None/Unknown	Yes	18	Dead	77	Lobectomy/Bilobectomy
White	Female	2005	Well differentiated; Grade I	IA	T1	N0	M0	None/Unknown	No/Unknown	0	Dead	72	Lobectomy/Bilobectomy
White	Male	2005	Moderately differentiated; Grade II	IA	T1	N0	M0	None/Unknown	No/Unknown	54	Dead	51	Lobectomy/Bilobectomy
White	Male	2005	Moderately differentiated; Grade II	IA	T1	N0	M0	None/Unknown	No/Unknown	38	Dead	69	Lobectomy/Bilobectomy
White	Female	2005	Moderately differentiated; Grade II	IA	T1	N0	M0	None/Unknown	No/Unknown	52	Dead	72	Lobectomy/Bilobectomy
Black	Male	2005	Poorly differentiated; Grade III	IA	T1	N0	M0	None/Unknown	No/Unknown	130	Alive	65	Lobectomy/Bilobectomy
White	Male	2005	Moderately differentiated; Grade II	IA	T1	N0	M0	None/Unknown	No/Unknown	123	Alive	74	Lobectomy/Bilobectomy
White	Female	2005	Moderately differentiated; Grade II	IA	T1	N0	M0	None/Unknown	No/Unknown	131	Alive	73	Lobectomy/Bilobectomy
White	Male	2005	Moderately differentiated; Grade II	IA	T1	N0	M0	None/Unknown	No/Unknown	128	Alive	83	Lobectomy/Bilobectomy
White	Female	2005	Moderately differentiated; Grade II	IA	T1	N0	M0	None/Unknown	No/Unknown	120	Alive	60	Lobectomy/Bilobectomy
White	Female	2005	Well differentiated; Grade I	IA	T1	N0	M0	None/Unknown	No/Unknown	121	Alive	76	Lobectomy/Bilobectomy
White	Male	2005	Moderately differentiated; Grade II	IA	T1	N0	M0	None/Unknown	No/Unknown	42	Dead	59	Lobectomy/Bilobectomy
White	Male	2005	Moderately differentiated; Grade II	IA	T1	N0	M0	None/Unknown	No/Unknown	126	Alive	73	Lobectomy/Bilobectomy
White	Female	2005	Moderately differentiated; Grade II	IA	T1	N0	M0	None/Unknown	Yes	70	Dead	69	Lobectomy/Bilobectomy
White	Male	2005	Moderately differentiated; Grade II	IA	T1	N0	M0	None/Unknown	No/Unknown	119	Dead	68	Lobectomy/Bilobectomy
White	Female	2005	Unknown	IA	T1	N0	M0	None/Unknown	No/Unknown	74	Dead	79	Lobectomy/Bilobectomy
White	Male	2005	Poorly differentiated; Grade III	IA	T1	N0	M0	None/Unknown	No/Unknown	113	Dead	67	Lobectomy/Bilobectomy
White	Male	2005	Undifferentiated; anaplastic; Grade IV	IA	T1	N0	M0	None/Unknown	No/Unknown	120	Alive	54	Lobectomy/Bilobectomy
White	Female	2005	Moderately differentiated; Grade II	IA	T1	N0	M0	None/Unknown	No/Unknown	108	Dead	75	Lobectomy/Bilobectomy
White	Male	2005	Moderately differentiated; Grade II	IA	T1	N0	M0	None/Unknown	No/Unknown	108	Dead	76	Lobectomy/Bilobectomy
White	Female	2005	Well differentiated; Grade I	IA	T1	N0	M0	None/Unknown	No/Unknown	126	Alive	79	Lobectomy/Bilobectomy
White	Male	2005	Moderately differentiated; Grade II	IA	T1	N0	M0	None/Unknown	No/Unknown	103	Dead	57	Lobectomy/Bilobectomy
White	Female	2005	Moderately differentiated; Grade II	IA	T1	N0	M0	None/Unknown	No/Unknown	120	Alive	69	Lobectomy/Bilobectomy
Black	Female	2005	Moderately differentiated; Grade II	IA	T1	N0	M0	None/Unknown	No/Unknown	41	Dead	75	Lobectomy/Bilobectomy
White	Male	2005	Well differentiated; Grade I	IA	T1	N0	M0	None/Unknown	No/Unknown	79	Dead	66	Lobectomy/Bilobectomy
White	Male	2005	Moderately differentiated; Grade II	IA	T1	N0	M0	None/Unknown	No/Unknown	23	Dead	84	Lobectomy/Bilobectomy
White	Male	2005	Moderately differentiated; Grade II	IA	T1	N0	M0	None/Unknown	No/Unknown	54	Dead	49	Lobectomy/Bilobectomy
White	Male	2005	Moderately differentiated; Grade II	IA	T1	N0	M0	None/Unknown	No/Unknown	126	Alive	74	Lobectomy/Bilobectomy
Black	Female	2005	Unknown	IA	T1	N0	M0	None/Unknown	No/Unknown	46	Dead	71	Lobectomy/Bilobectomy
White	Male	2005	Poorly differentiated; Grade III	IA	T1	N0	M0	Beam radiation	Yes	7	Dead	56	Lobectomy/Bilobectomy
Black	Male	2005	Poorly differentiated; Grade III	IA	T1	N0	M0	None/Unknown	No/Unknown	127	Alive	67	Lobectomy/Bilobectomy
White	Female	2005	Well differentiated; Grade I	IA	T1	N0	M0	None/Unknown	No/Unknown	6	Dead	63	Lobectomy/Bilobectomy
White	Female	2005	Moderately differentiated; Grade II	IA	T1	N0	M0	None/Unknown	No/Unknown	127	Alive	65	Lobectomy/Bilobectomy
White	Male	2005	Moderately differentiated; Grade II	IA	T1	N0	M0	None/Unknown	No/Unknown	130	Alive	62	Lobectomy/Bilobectomy
White	Male	2005	Moderately differentiated; Grade II	IA	T1	N0	M0	None/Unknown	No/Unknown	121	Alive	49	Lobectomy/Bilobectomy
White	Female	2005	Moderately differentiated; Grade II	IA	T1	N0	M0	Beam radiation	No/Unknown	124	Alive	65	Lobectomy/Bilobectomy
White	Female	2005	Unknown	IA	T1	N0	M0	None/Unknown	No/Unknown	126	Alive	68	Lobectomy/Bilobectomy
White	Female	2005	Well differentiated; Grade I	IA	T1	N0	M0	None/Unknown	Yes	122	Alive	66	Lobectomy/Bilobectomy
White	Male	2005	Unknown	IA	T1	N0	M0	None/Unknown	No/Unknown	124	Alive	62	Lobectomy/Bilobectomy
White	Female	2005	Moderately differentiated; Grade II	IA	T1	N0	M0	None/Unknown	No/Unknown	131	Alive	72	Lobectomy/Bilobectomy
White	Male	2005	Poorly differentiated; Grade III	IA	T1	N0	M0	None/Unknown	No/Unknown	8	Dead	68	Lobectomy/Bilobectomy
Black	Female	2005	Well differentiated; Grade I	IA	T1	N0	M0	None/Unknown	No/Unknown	27	Dead	74	Lobectomy/Bilobectomy
White	Male	2005	Moderately differentiated; Grade II	IA	T1	N0	M0	None/Unknown	No/Unknown	120	Alive	56	Lobectomy/Bilobectomy
White	Male	2005	Moderately differentiated; Grade II	IA	T1	N0	M0	None/Unknown	No/Unknown	130	Alive	64	Lobectomy/Bilobectomy
White	Female	2005	Poorly differentiated; Grade III	IA	T1	N0	M0	None/Unknown	No/Unknown	71	Dead	75	Lobectomy/Bilobectomy
Black	Male	2005	Well differentiated; Grade I	IA	T1	N0	M0	None/Unknown	No/Unknown	67	Dead	75	Lobectomy/Bilobectomy
Other (American Indian/AK Native, Asian/Pacific Islander)	Male	2005	Poorly differentiated; Grade III	IA	T1	N0	M0	None/Unknown	No/Unknown	99	Dead	68	Lobectomy/Bilobectomy
White	Male	2005	Well differentiated; Grade I	IA	T1	N0	M0	None/Unknown	No/Unknown	0	Dead	73	Lobectomy/Bilobectomy
White	Female	2005	Well differentiated; Grade I	IA	T1	N0	M0	None/Unknown	No/Unknown	126	Alive	74	Lobectomy/Bilobectomy
White	Female	2005	Well differentiated; Grade I	IA	T1	N0	M0	None/Unknown	No/Unknown	123	Alive	70	Lobectomy/Bilobectomy
White	Male	2005	Moderately differentiated; Grade II	IA	T1	N0	M0	None/Unknown	No/Unknown	120	Alive	58	Lobectomy/Bilobectomy
Other (American Indian/AK Native, Asian/Pacific Islander)	Female	2005	Well differentiated; Grade I	IA	T1	N0	M0	None/Unknown	No/Unknown	89	Dead	67	Lobectomy/Bilobectomy
Other (American Indian/AK Native, Asian/Pacific Islander)	Female	2005	Poorly differentiated; Grade III	IA	T1	N0	M0	None/Unknown	No/Unknown	24	Dead	68	Lobectomy/Bilobectomy
White	Male	2005	Moderately differentiated; Grade II	IA	T1	N0	M0	None/Unknown	No/Unknown	100	Dead	61	Lobectomy/Bilobectomy
Other (American Indian/AK Native, Asian/Pacific Islander)	Female	2005	Moderately differentiated; Grade II	IA	T1	N0	M0	None/Unknown	No/Unknown	55	Dead	69	Lobectomy/Bilobectomy
Other (American Indian/AK Native, Asian/Pacific Islander)	Female	2005	Moderately differentiated; Grade II	IA	T1	N0	M0	None/Unknown	No/Unknown	128	Alive	77	Lobectomy/Bilobectomy
Other (American Indian/AK Native, Asian/Pacific Islander)	Female	2005	Moderately differentiated; Grade II	IA	T1	N0	M0	None/Unknown	No/Unknown	74	Dead	74	Lobectomy/Bilobectomy
Other (American Indian/AK Native, Asian/Pacific Islander)	Female	2005	Moderately differentiated; Grade II	IA	T1	N0	M0	None/Unknown	No/Unknown	128	Alive	60	Lobectomy/Bilobectomy
Other (American Indian/AK Native, Asian/Pacific Islander)	Female	2005	Well differentiated; Grade I	IA	T1	N0	M0	None/Unknown	No/Unknown	124	Alive	72	Lobectomy/Bilobectomy
Other (American Indian/AK Native, Asian/Pacific Islander)	Female	2005	Moderately differentiated; Grade II	IA	T1	N0	M0	None/Unknown	No/Unknown	94	Dead	73	Lobectomy/Bilobectomy
Other (American Indian/AK Native, Asian/Pacific Islander)	Female	2005	Well differentiated; Grade I	IA	T1	N0	M0	None/Unknown	No/Unknown	28	Dead	86	Lobectomy/Bilobectomy
Other (American Indian/AK Native, Asian/Pacific Islander)	Male	2005	Well differentiated; Grade I	IA	T1	N0	M0	None/Unknown	No/Unknown	124	Alive	50	Lobectomy/Bilobectomy
Other (American Indian/AK Native, Asian/Pacific Islander)	Male	2005	Moderately differentiated; Grade II	IA	T1	N0	M0	None/Unknown	No/Unknown	127	Alive	81	Lobectomy/Bilobectomy
Other (American Indian/AK Native, Asian/Pacific Islander)	Female	2005	Poorly differentiated; Grade III	IA	T1	N0	M0	None/Unknown	Yes	121	Alive	59	Lobectomy/Bilobectomy
Other (American Indian/AK Native, Asian/Pacific Islander)	Female	2005	Undifferentiated; anaplastic; Grade IV	IA	T1	N0	M0	None/Unknown	No/Unknown	74	Dead	44	Lobectomy/Bilobectomy
Other (American Indian/AK Native, Asian/Pacific Islander)	Female	2005	Moderately differentiated; Grade II	IA	T1	N0	M0	None/Unknown	No/Unknown	121	Alive	54	Lobectomy/Bilobectomy
Other (American Indian/AK Native, Asian/Pacific Islander)	Female	2005	Poorly differentiated; Grade III	IA	T1	N0	M0	None/Unknown	No/Unknown	127	Alive	59	Lobectomy/Bilobectomy
White	Female	2005	Moderately differentiated; Grade II	IA	T1	N0	M0	None/Unknown	No/Unknown	21	Dead	64	Lobectomy/Bilobectomy
Other (American Indian/AK Native, Asian/Pacific Islander)	Female	2005	Well differentiated; Grade I	IA	T1	N0	M0	None/Unknown	No/Unknown	131	Alive	39	Lobectomy/Bilobectomy
White	Male	2005	Poorly differentiated; Grade III	IA	T1	N0	M0	None/Unknown	No/Unknown	93	Dead	78	Lobectomy/Bilobectomy
White	Female	2005	Poorly differentiated; Grade III	IA	T1	N0	M0	None/Unknown	No/Unknown	127	Alive	64	Lobectomy/Bilobectomy
White	Male	2005	Moderately differentiated; Grade II	IA	T1	N0	M0	None/Unknown	No/Unknown	29	Dead	71	Lobectomy/Bilobectomy
White	Female	2005	Moderately differentiated; Grade II	IA	T1	N0	M0	None/Unknown	No/Unknown	33	Dead	66	Lobectomy/Bilobectomy
White	Male	2005	Moderately differentiated; Grade II	IA	T1	N0	M0	None/Unknown	No/Unknown	28	Dead	83	Lobectomy/Bilobectomy
White	Female	2005	Poorly differentiated; Grade III	IA	T1	N0	M0	None/Unknown	Yes	125	Alive	54	Lobectomy/Bilobectomy
White	Male	2005	Well differentiated; Grade I	IA	T1	N0	M0	None/Unknown	Yes	104	Dead	66	Lobectomy/Bilobectomy
White	Female	2005	Poorly differentiated; Grade III	IA	T1	N0	M0	None/Unknown	No/Unknown	80	Alive	71	Lobectomy/Bilobectomy
White	Male	2005	Moderately differentiated; Grade II	IA	T1	N0	M0	None/Unknown	No/Unknown	44	Dead	65	Lobectomy/Bilobectomy
Black	Female	2005	Unknown	IA	T1	N0	M0	None/Unknown	No/Unknown	54	Dead	67	Lobectomy/Bilobectomy
White	Female	2005	Well differentiated; Grade I	IA	T1	N0	M0	None/Unknown	No/Unknown	109	Dead	73	Lobectomy/Bilobectomy
White	Female	2005	Moderately differentiated; Grade II	IA	T1	N0	M0	None/Unknown	Yes	129	Alive	65	Lobectomy/Bilobectomy
White	Male	2005	Moderately differentiated; Grade II	IA	T1	N0	M0	None/Unknown	No/Unknown	59	Dead	60	Lobectomy/Bilobectomy
White	Female	2005	Moderately differentiated; Grade II	IA	T1	N0	M0	None/Unknown	No/Unknown	66	Dead	77	Lobectomy/Bilobectomy
White	Male	2005	Poorly differentiated; Grade III	IA	T1	N0	M0	None/Unknown	No/Unknown	23	Dead	49	Lobectomy/Bilobectomy
White	Male	2005	Poorly differentiated; Grade III	IA	T1	N0	M0	None/Unknown	No/Unknown	120	Dead	63	Lobectomy/Bilobectomy
White	Female	2005	Well differentiated; Grade I	IA	T1	N0	M0	None/Unknown	No/Unknown	123	Alive	63	Lobectomy/Bilobectomy
White	Male	2005	Moderately differentiated; Grade II	IA	T1	N0	M0	None/Unknown	No/Unknown	124	Alive	72	Lobectomy/Bilobectomy
White	Male	2005	Poorly differentiated; Grade III	IA	T1	N0	M0	None/Unknown	Yes	123	Alive	52	Lobectomy/Bilobectomy
White	Male	2005	Poorly differentiated; Grade III	IA	T1	N0	M0	None/Unknown	No/Unknown	68	Dead	72	Lobectomy/Bilobectomy
White	Female	2005	Well differentiated; Grade I	IA	T1	N0	M0	None/Unknown	No/Unknown	96	Dead	78	Lobectomy/Bilobectomy
White	Female	2005	Moderately differentiated; Grade II	IA	T1	N0	M0	None/Unknown	No/Unknown	126	Alive	55	Lobectomy/Bilobectomy
White	Male	2005	Moderately differentiated; Grade II	IA	T1	N0	M0	None/Unknown	No/Unknown	125	Alive	73	Lobectomy/Bilobectomy
White	Male	2005	Moderately differentiated; Grade II	IA	T1	N0	M0	None/Unknown	No/Unknown	131	Alive	77	Lobectomy/Bilobectomy
White	Male	2005	Undifferentiated; anaplastic; Grade IV	IA	T1	N0	M0	None/Unknown	No/Unknown	125	Dead	74	Lobectomy/Bilobectomy
White	Male	2005	Poorly differentiated; Grade III	IA	T1	N0	M0	None/Unknown	No/Unknown	58	Dead	60	Lobectomy/Bilobectomy
White	Male	2005	Moderately differentiated; Grade II	IA	T1	N0	M0	None/Unknown	No/Unknown	52	Dead	78	Lobectomy/Bilobectomy
White	Female	2005	Poorly differentiated; Grade III	IA	T1	N0	M0	None/Unknown	No/Unknown	128	Alive	66	Lobectomy/Bilobectomy
White	Male	2005	Poorly differentiated; Grade III	IA	T1	N0	M0	None/Unknown	No/Unknown	47	Dead	77	Lobectomy/Bilobectomy
White	Male	2005	Poorly differentiated; Grade III	IA	T1	N0	M0	None/Unknown	No/Unknown	127	Alive	50	Lobectomy/Bilobectomy
White	Male	2005	Poorly differentiated; Grade III	IA	T1	N0	M0	None/Unknown	No/Unknown	125	Alive	54	Lobectomy/Bilobectomy
White	Male	2005	Well differentiated; Grade I	IA	T1	N0	M0	None/Unknown	No/Unknown	89	Dead	69	Lobectomy/Bilobectomy
White	Male	2005	Moderately differentiated; Grade II	IA	T1	N0	M0	None/Unknown	Yes	123	Alive	65	Lobectomy/Bilobectomy
White	Female	2005	Poorly differentiated; Grade III	IA	T1	N0	M0	None/Unknown	No/Unknown	124	Alive	75	Lobectomy/Bilobectomy
White	Female	2005	Moderately differentiated; Grade II	IA	T1	N0	M0	None/Unknown	No/Unknown	129	Alive	53	Lobectomy/Bilobectomy
White	Female	2005	Moderately differentiated; Grade II	IA	T1	N0	M0	None/Unknown	No/Unknown	121	Alive	70	Lobectomy/Bilobectomy
White	Female	2005	Moderately differentiated; Grade II	IA	T1	N0	M0	None/Unknown	No/Unknown	102	Dead	65	Lobectomy/Bilobectomy
White	Male	2005	Well differentiated; Grade I	IA	T1	N0	M0	None/Unknown	No/Unknown	62	Dead	70	Lobectomy/Bilobectomy
White	Female	2005	Moderately differentiated; Grade II	IA	T1	N0	M0	None/Unknown	No/Unknown	126	Alive	75	Lobectomy/Bilobectomy
White	Female	2005	Moderately differentiated; Grade II	IA	T1	N0	M0	None/Unknown	No/Unknown	6	Dead	75	Lobectomy/Bilobectomy
Other (American Indian/AK Native, Asian/Pacific Islander)	Male	2005	Well differentiated; Grade I	IA	T1	N0	M0	None/Unknown	No/Unknown	121	Alive	71	Lobectomy/Bilobectomy
White	Female	2005	Undifferentiated; anaplastic; Grade IV	IA	T1	N0	M0	Beam radiation	No/Unknown	20	Dead	68	Lobectomy/Bilobectomy
White	Male	2005	Moderately differentiated; Grade II	IA	T1	N0	M0	None/Unknown	No/Unknown	120	Alive	67	Lobectomy/Bilobectomy
White	Female	2005	Poorly differentiated; Grade III	IA	T1	N0	M0	None/Unknown	No/Unknown	127	Alive	59	Lobectomy/Bilobectomy
White	Male	2005	Well differentiated; Grade I	IA	T1	N0	M0	None/Unknown	No/Unknown	10	Dead	75	Lobectomy/Bilobectomy
Black	Male	2005	Moderately differentiated; Grade II	IA	T1	N0	M0	None/Unknown	No/Unknown	123	Alive	61	Lobectomy/Bilobectomy
White	Female	2005	Poorly differentiated; Grade III	IA	T1	N0	M0	None/Unknown	No/Unknown	121	Alive	57	Lobectomy/Bilobectomy
White	Male	2005	Poorly differentiated; Grade III	IA	T1	N0	M0	None/Unknown	No/Unknown	15	Dead	65	Lobectomy/Bilobectomy
White	Male	2005	Moderately differentiated; Grade II	IA	T1	N0	M0	None/Unknown	No/Unknown	44	Dead	82	Lobectomy/Bilobectomy
White	Male	2005	Poorly differentiated; Grade III	IA	T1	N0	M0	Beam radiation	Yes	17	Dead	75	Lobectomy/Bilobectomy
White	Male	2005	Moderately differentiated; Grade II	IA	T1	N0	M0	None/Unknown	No/Unknown	123	Alive	62	Lobectomy/Bilobectomy
White	Female	2005	Moderately differentiated; Grade II	IA	T1	N0	M0	None/Unknown	No/Unknown	129	Alive	78	Lobectomy/Bilobectomy
White	Female	2005	Moderately differentiated; Grade II	IA	T1	N0	M0	None/Unknown	No/Unknown	125	Alive	57	Lobectomy/Bilobectomy
White	Female	2005	Moderately differentiated; Grade II	IA	T1	N0	M0	Beam radiation	Yes	73	Dead	61	Lobectomy/Bilobectomy
White	Male	2005	Poorly differentiated; Grade III	IA	T1	N0	M0	None/Unknown	No/Unknown	125	Dead	63	Lobectomy/Bilobectomy
White	Female	2005	Well differentiated; Grade I	IA	T1	N0	M0	None/Unknown	No/Unknown	44	Dead	60	Lobectomy/Bilobectomy
White	Male	2005	Moderately differentiated; Grade II	IA	T1	N0	M0	None/Unknown	No/Unknown	82	Dead	59	Lobectomy/Bilobectomy
White	Female	2005	Poorly differentiated; Grade III	IA	T1	N0	M0	None/Unknown	No/Unknown	109	Dead	80	Lobectomy/Bilobectomy
White	Male	2005	Moderately differentiated; Grade II	IA	T1	N0	M0	None/Unknown	No/Unknown	116	Dead	64	Lobectomy/Bilobectomy
White	Female	2005	Moderately differentiated; Grade II	IA	T1	N0	M0	None/Unknown	No/Unknown	108	Dead	63	Lobectomy/Bilobectomy
White	Female	2005	Moderately differentiated; Grade II	IA	T1	N0	M0	None/Unknown	No/Unknown	42	Dead	82	Lobectomy/Bilobectomy
White	Male	2005	Moderately differentiated; Grade II	IA	T1	N0	M0	None/Unknown	No/Unknown	129	Alive	70	Lobectomy/Bilobectomy
White	Female	2005	Moderately differentiated; Grade II	IA	T1	N0	M0	None/Unknown	Yes	127	Alive	45	Lobectomy/Bilobectomy
White	Female	2005	Well differentiated; Grade I	IA	T1	N0	M0	None/Unknown	No/Unknown	122	Alive	64	Lobectomy/Bilobectomy
White	Male	2005	Moderately differentiated; Grade II	IA	T1	N0	M0	None/Unknown	No/Unknown	130	Alive	63	Lobectomy/Bilobectomy
White	Female	2005	Moderately differentiated; Grade II	IA	T1	N0	M0	None/Unknown	No/Unknown	102	Dead	69	Lobectomy/Bilobectomy
White	Female	2005	Moderately differentiated; Grade II	IA	T1	N0	M0	None/Unknown	No/Unknown	123	Alive	78	Lobectomy/Bilobectomy
White	Male	2005	Moderately differentiated; Grade II	IA	T1	N0	M0	None/Unknown	No/Unknown	39	Dead	72	Lobectomy/Bilobectomy
White	Male	2005	Moderately differentiated; Grade II	IA	T1	N0	M0	None/Unknown	No/Unknown	85	Dead	77	Lobectomy/Bilobectomy
White	Female	2005	Moderately differentiated; Grade II	IA	T1	N0	M0	None/Unknown	No/Unknown	111	Dead	69	Lobectomy/Bilobectomy
White	Female	2005	Poorly differentiated; Grade III	IA	T1	N0	M0	None/Unknown	No/Unknown	129	Alive	60	Lobectomy/Bilobectomy
White	Male	2005	Poorly differentiated; Grade III	IA	T1	N0	M0	None/Unknown	No/Unknown	78	Dead	59	Lobectomy/Bilobectomy
White	Female	2005	Moderately differentiated; Grade II	IA	T1	N0	M0	None/Unknown	No/Unknown	5	Dead	74	Lobectomy/Bilobectomy
Other (American Indian/AK Native, Asian/Pacific Islander)	Male	2005	Moderately differentiated; Grade II	IA	T1	N0	M0	None/Unknown	No/Unknown	62	Dead	66	Lobectomy/Bilobectomy
White	Female	2005	Unknown	IA	T1	N0	M0	None/Unknown	No/Unknown	131	Alive	54	Lobectomy/Bilobectomy
White	Female	2005	Moderately differentiated; Grade II	IA	T1	N0	M0	None/Unknown	No/Unknown	82	Dead	83	Lobectomy/Bilobectomy
White	Female	2005	Well differentiated; Grade I	IA	T1	N0	M0	None/Unknown	No/Unknown	121	Dead	69	Lobectomy/Bilobectomy
White	Female	2005	Moderately differentiated; Grade II	IA	T1	N0	M0	None/Unknown	No/Unknown	123	Dead	63	Lobectomy/Bilobectomy
Other (American Indian/AK Native, Asian/Pacific Islander)	Male	2005	Moderately differentiated; Grade II	IA	T1	N0	M0	None/Unknown	No/Unknown	121	Dead	67	Lobectomy/Bilobectomy
White	Female	2005	Moderately differentiated; Grade II	IA	T1	N0	M0	None/Unknown	No/Unknown	130	Alive	51	Lobectomy/Bilobectomy
White	Male	2005	Moderately differentiated; Grade II	IA	T1	N0	M0	None/Unknown	No/Unknown	130	Alive	70	Lobectomy/Bilobectomy
White	Female	2005	Moderately differentiated; Grade II	IA	T1	N0	M0	None/Unknown	No/Unknown	62	Dead	78	Lobectomy/Bilobectomy
White	Female	2005	Moderately differentiated; Grade II	IA	T1	N0	M0	None/Unknown	No/Unknown	129	Alive	68	Lobectomy/Bilobectomy
White	Female	2005	Well differentiated; Grade I	IA	T1	N0	M0	None/Unknown	No/Unknown	128	Alive	68	Lobectomy/Bilobectomy
White	Female	2005	Moderately differentiated; Grade II	IA	T1	N0	M0	None/Unknown	No/Unknown	129	Alive	48	Lobectomy/Bilobectomy
White	Female	2005	Moderately differentiated; Grade II	IA	T1	N0	M0	None/Unknown	No/Unknown	99	Dead	85	Lobectomy/Bilobectomy
White	Male	2005	Moderately differentiated; Grade II	IA	T1	N0	M0	None/Unknown	Yes	65	Dead	63	Lobectomy/Bilobectomy
White	Female	2005	Poorly differentiated; Grade III	IA	T1	N0	M0	None/Unknown	Yes	80	Dead	70	Lobectomy/Bilobectomy
White	Male	2005	Moderately differentiated; Grade II	IA	T1	N0	M0	None/Unknown	No/Unknown	25	Dead	69	Lobectomy/Bilobectomy
White	Female	2005	Moderately differentiated; Grade II	IA	T1	N0	M0	None/Unknown	No/Unknown	102	Dead	72	Lobectomy/Bilobectomy
White	Male	2005	Moderately differentiated; Grade II	IA	T1	N0	M0	None/Unknown	No/Unknown	31	Dead	85	Lobectomy/Bilobectomy
White	Female	2005	Poorly differentiated; Grade III	IA	T1	N0	M0	None/Unknown	No/Unknown	7	Dead	75	Lobectomy/Bilobectomy
White	Male	2005	Poorly differentiated; Grade III	IA	T1	N0	M0	None/Unknown	No/Unknown	35	Dead	80	Lobectomy/Bilobectomy
White	Female	2005	Moderately differentiated; Grade II	IA	T1	N0	M0	None/Unknown	No/Unknown	126	Alive	61	Lobectomy/Bilobectomy
White	Female	2005	Poorly differentiated; Grade III	IA	T1	N0	M0	None/Unknown	No/Unknown	126	Alive	65	Lobectomy/Bilobectomy
White	Female	2005	Moderately differentiated; Grade II	IA	T1	N0	M0	None/Unknown	No/Unknown	126	Alive	71	Lobectomy/Bilobectomy
White	Female	2005	Moderately differentiated; Grade II	IA	T1	N0	M0	None/Unknown	No/Unknown	125	Alive	63	Lobectomy/Bilobectomy
White	Male	2005	Moderately differentiated; Grade II	IA	T1	N0	M0	None/Unknown	Yes	126	Alive	60	Lobectomy/Bilobectomy
White	Female	2005	Well differentiated; Grade I	IA	T1	N0	M0	None/Unknown	No/Unknown	126	Alive	62	Lobectomy/Bilobectomy
Other (American Indian/AK Native, Asian/Pacific Islander)	Female	2005	Well differentiated; Grade I	IA	T1	N0	M0	None/Unknown	No/Unknown	125	Alive	56	Lobectomy/Bilobectomy
White	Female	2005	Moderately differentiated; Grade II	IA	T1	N0	M0	None/Unknown	Yes	124	Alive	57	Lobectomy/Bilobectomy
White	Female	2005	Poorly differentiated; Grade III	IA	T1	N0	M0	None/Unknown	No/Unknown	43	Dead	78	Lobectomy/Bilobectomy
White	Female	2005	Undifferentiated; anaplastic; Grade IV	IA	T1	N0	M0	None/Unknown	No/Unknown	73	Dead	53	Lobectomy/Bilobectomy
White	Male	2005	Moderately differentiated; Grade II	IA	T1	N0	M0	None/Unknown	No/Unknown	60	Dead	73	Lobectomy/Bilobectomy
White	Male	2005	Moderately differentiated; Grade II	IA	T1	N0	M0	None/Unknown	No/Unknown	126	Alive	60	Lobectomy/Bilobectomy
White	Male	2005	Moderately differentiated; Grade II	IA	T1	N0	M0	None/Unknown	No/Unknown	124	Alive	59	Lobectomy/Bilobectomy
White	Male	2005	Well differentiated; Grade I	IA	T1	N0	M0	None/Unknown	No/Unknown	79	Dead	76	Lobectomy/Bilobectomy
White	Male	2005	Unknown	IA	T1	N0	M0	None/Unknown	No/Unknown	33	Dead	68	Lobectomy/Bilobectomy
White	Male	2005	Poorly differentiated; Grade III	IA	T1	N0	M0	None/Unknown	No/Unknown	13	Dead	70	Lobectomy/Bilobectomy
Other (American Indian/AK Native, Asian/Pacific Islander)	Male	2005	Poorly differentiated; Grade III	IA	T1	N0	M0	None/Unknown	No/Unknown	63	Dead	63	Lobectomy/Bilobectomy
White	Female	2005	Well differentiated; Grade I	IA	T1	N0	M0	None/Unknown	No/Unknown	21	Dead	73	Lobectomy/Bilobectomy
White	Male	2005	Moderately differentiated; Grade II	IA	T1	N0	M0	None/Unknown	No/Unknown	107	Dead	74	Lobectomy/Bilobectomy
White	Female	2005	Moderately differentiated; Grade II	IA	T1	N0	M0	None/Unknown	Yes	121	Alive	59	Lobectomy/Bilobectomy
Other (American Indian/AK Native, Asian/Pacific Islander)	Female	2005	Well differentiated; Grade I	IA	T1	N0	M0	None/Unknown	No/Unknown	121	Alive	55	Lobectomy/Bilobectomy
White	Female	2005	Moderately differentiated; Grade II	IA	T1	N0	M0	None/Unknown	No/Unknown	125	Alive	72	Lobectomy/Bilobectomy
White	Male	2005	Moderately differentiated; Grade II	IA	T1	N0	M0	None/Unknown	No/Unknown	22	Dead	76	Lobectomy/Bilobectomy
White	Female	2005	Moderately differentiated; Grade II	IA	T1	N0	M0	None/Unknown	No/Unknown	59	Dead	65	Lobectomy/Bilobectomy
White	Female	2005	Moderately differentiated; Grade II	IA	T1	N0	M0	None/Unknown	No/Unknown	120	Alive	68	Lobectomy/Bilobectomy
White	Female	2005	Well differentiated; Grade I	IA	T1	N0	M0	None/Unknown	No/Unknown	120	Alive	60	Lobectomy/Bilobectomy
White	Female	2005	Moderately differentiated; Grade II	IA	T1	N0	M0	None/Unknown	No/Unknown	120	Alive	60	Lobectomy/Bilobectomy
Other (American Indian/AK Native, Asian/Pacific Islander)	Female	2005	Moderately differentiated; Grade II	IA	T1	N0	M0	None/Unknown	No/Unknown	62	Dead	70	Lobectomy/Bilobectomy
White	Male	2005	Well differentiated; Grade I	IA	T1	N0	M0	None/Unknown	No/Unknown	57	Dead	77	Lobectomy/Bilobectomy
White	Male	2005	Poorly differentiated; Grade III	IA	T1	N0	M0	None/Unknown	No/Unknown	128	Alive	47	Lobectomy/Bilobectomy
White	Male	2005	Poorly differentiated; Grade III	IA	T1	N0	M0	None/Unknown	No/Unknown	66	Dead	51	Lobectomy/Bilobectomy
White	Female	2005	Poorly differentiated; Grade III	IA	T1	N0	M0	None/Unknown	No/Unknown	43	Dead	56	Lobectomy/Bilobectomy
White	Female	2005	Well differentiated; Grade I	IA	T1	N0	M0	None/Unknown	No/Unknown	8	Dead	80	Lobectomy/Bilobectomy
White	Male	2005	Poorly differentiated; Grade III	IA	T1	N0	M0	None/Unknown	No/Unknown	27	Dead	80	Lobectomy/Bilobectomy
White	Male	2005	Moderately differentiated; Grade II	IA	T1	N0	M0	None/Unknown	No/Unknown	30	Dead	79	Lobectomy/Bilobectomy
White	Female	2005	Poorly differentiated; Grade III	IA	T1	N0	M0	None/Unknown	No/Unknown	100	Dead	61	Lobectomy/Bilobectomy
Black	Female	2005	Moderately differentiated; Grade II	IA	T1	N0	M0	None/Unknown	No/Unknown	46	Dead	60	Lobectomy/Bilobectomy
White	Female	2005	Moderately differentiated; Grade II	IA	T1	N0	M0	None/Unknown	No/Unknown	120	Alive	63	Lobectomy/Bilobectomy
White	Female	2005	Moderately differentiated; Grade II	IA	T1	N0	M0	None/Unknown	No/Unknown	122	Alive	76	Lobectomy/Bilobectomy
White	Female	2005	Poorly differentiated; Grade III	IA	T1	N0	M0	None/Unknown	No/Unknown	129	Alive	53	Lobectomy/Bilobectomy
White	Female	2005	Poorly differentiated; Grade III	IA	T1	N0	M0	None/Unknown	No/Unknown	57	Dead	74	Lobectomy/Bilobectomy
White	Male	2005	Moderately differentiated; Grade II	IA	T1	N0	M0	None/Unknown	No/Unknown	13	Dead	71	Lobectomy/Bilobectomy
White	Female	2005	Moderately differentiated; Grade II	IA	T1	N0	M0	None/Unknown	No/Unknown	127	Alive	65	Lobectomy/Bilobectomy
White	Male	2005	Well differentiated; Grade I	IA	T1	N0	M0	None/Unknown	No/Unknown	85	Dead	64	Lobectomy/Bilobectomy
Black	Female	2005	Poorly differentiated; Grade III	IA	T1	N0	M0	None/Unknown	No/Unknown	109	Alive	45	Lobectomy/Bilobectomy
White	Female	2005	Well differentiated; Grade I	IA	T1	N0	M0	None/Unknown	No/Unknown	124	Alive	49	Lobectomy/Bilobectomy
White	Female	2005	Moderately differentiated; Grade II	IA	T1	N0	M0	None/Unknown	No/Unknown	129	Alive	77	Lobectomy/Bilobectomy
White	Female	2005	Moderately differentiated; Grade II	IA	T1	N0	M0	None/Unknown	No/Unknown	66	Dead	74	Lobectomy/Bilobectomy
White	Female	2005	Moderately differentiated; Grade II	IA	T1	N0	M0	None/Unknown	No/Unknown	130	Alive	63	Lobectomy/Bilobectomy
White	Female	2005	Moderately differentiated; Grade II	IA	T1	N0	M0	None/Unknown	No/Unknown	131	Alive	79	Lobectomy/Bilobectomy
White	Male	2005	Moderately differentiated; Grade II	IA	T1	N0	M0	None/Unknown	No/Unknown	36	Dead	71	Lobectomy/Bilobectomy
White	Male	2005	Moderately differentiated; Grade II	IA	T1	N0	M0	None/Unknown	No/Unknown	128	Alive	67	Lobectomy/Bilobectomy
White	Female	2005	Moderately differentiated; Grade II	IA	T1	N0	M0	None/Unknown	No/Unknown	59	Dead	65	Lobectomy/Bilobectomy
White	Male	2005	Poorly differentiated; Grade III	IA	T1	N0	M0	None/Unknown	No/Unknown	57	Dead	62	Lobectomy/Bilobectomy
White	Male	2005	Moderately differentiated; Grade II	IA	T1	N0	M0	None/Unknown	No/Unknown	125	Alive	72	Lobectomy/Bilobectomy
White	Male	2005	Moderately differentiated; Grade II	IA	T1	N0	M0	None/Unknown	No/Unknown	121	Alive	58	Lobectomy/Bilobectomy
White	Female	2005	Poorly differentiated; Grade III	IA	T1	N0	M0	None/Unknown	No/Unknown	120	Alive	74	Lobectomy/Bilobectomy
White	Female	2005	Moderately differentiated; Grade II	IA	T1	N0	M0	None/Unknown	No/Unknown	120	Alive	59	Lobectomy/Bilobectomy
Black	Male	2005	Poorly differentiated; Grade III	IA	T1	N0	M0	None/Unknown	No/Unknown	40	Dead	60	Lobectomy/Bilobectomy
White	Female	2005	Moderately differentiated; Grade II	IA	T1	N0	M0	None/Unknown	No/Unknown	104	Dead	75	Lobectomy/Bilobectomy
White	Female	2005	Poorly differentiated; Grade III	IA	T1	N0	M0	None/Unknown	No/Unknown	121	Alive	67	Lobectomy/Bilobectomy
White	Female	2005	Moderately differentiated; Grade II	IA	T1	N0	M0	None/Unknown	No/Unknown	18	Dead	68	Lobectomy/Bilobectomy
Other (American Indian/AK Native, Asian/Pacific Islander)	Male	2005	Poorly differentiated; Grade III	IA	T1	N0	M0	None/Unknown	No/Unknown	24	Dead	73	Lobectomy/Bilobectomy
White	Female	2005	Moderately differentiated; Grade II	IA	T1	N0	M0	None/Unknown	No/Unknown	125	Alive	68	Lobectomy/Bilobectomy
White	Female	2005	Moderately differentiated; Grade II	IA	T1	N0	M0	None/Unknown	No/Unknown	29	Dead	86	Lobectomy/Bilobectomy
White	Male	2005	Moderately differentiated; Grade II	IA	T1	N0	M0	None/Unknown	No/Unknown	129	Alive	79	Lobectomy/Bilobectomy
Other (American Indian/AK Native, Asian/Pacific Islander)	Male	2005	Moderately differentiated; Grade II	IA	T1	N0	M0	None/Unknown	No/Unknown	130	Alive	72	Lobectomy/Bilobectomy
Other (American Indian/AK Native, Asian/Pacific Islander)	Female	2005	Moderately differentiated; Grade II	IA	T1	N0	M0	None/Unknown	No/Unknown	45	Dead	76	Lobectomy/Bilobectomy
White	Male	2005	Moderately differentiated; Grade II	IA	T1	N0	M0	None/Unknown	No/Unknown	103	Alive	59	Lobectomy/Bilobectomy
White	Female	2005	Poorly differentiated; Grade III	IA	T1	N0	M0	None/Unknown	No/Unknown	131	Alive	60	Lobectomy/Bilobectomy
White	Male	2005	Well differentiated; Grade I	IA	T1	N0	M0	Beam radiation	No/Unknown	48	Dead	86	Lobectomy/Bilobectomy
Other (American Indian/AK Native, Asian/Pacific Islander)	Female	2005	Moderately differentiated; Grade II	IA	T1	N0	M0	None/Unknown	No/Unknown	66	Dead	78	Lobectomy/Bilobectomy
White	Female	2005	Moderately differentiated; Grade II	IA	T1	N0	M0	None/Unknown	No/Unknown	109	Dead	54	Lobectomy/Bilobectomy
White	Female	2005	Moderately differentiated; Grade II	IA	T1	N0	M0	None/Unknown	No/Unknown	127	Alive	76	Lobectomy/Bilobectomy
White	Female	2005	Well differentiated; Grade I	IA	T1	N0	M0	None/Unknown	Yes	120	Alive	59	Lobectomy/Bilobectomy
White	Female	2005	Well differentiated; Grade I	IA	T1	N0	M0	None/Unknown	No/Unknown	99	Dead	66	Lobectomy/Bilobectomy
White	Female	2005	Moderately differentiated; Grade II	IA	T1	N0	M0	None/Unknown	No/Unknown	120	Alive	75	Lobectomy/Bilobectomy
White	Male	2005	Poorly differentiated; Grade III	IA	T1	N0	M0	None/Unknown	Yes	13	Dead	67	Lobectomy/Bilobectomy
White	Male	2005	Moderately differentiated; Grade II	IA	T1	N0	M0	None/Unknown	No/Unknown	88	Dead	84	Lobectomy/Bilobectomy
White	Female	2005	Moderately differentiated; Grade II	IA	T1	N0	M0	None/Unknown	No/Unknown	1	Dead	76	Lobectomy/Bilobectomy
White	Male	2005	Moderately differentiated; Grade II	IA	T1	N0	M0	None/Unknown	No/Unknown	129	Alive	71	Lobectomy/Bilobectomy
White	Male	2005	Moderately differentiated; Grade II	IA	T1	N0	M0	None/Unknown	No/Unknown	94	Dead	70	Lobectomy/Bilobectomy
White	Female	2005	Well differentiated; Grade I	IA	T1	N0	M0	None/Unknown	No/Unknown	125	Alive	60	Lobectomy/Bilobectomy
White	Female	2005	Poorly differentiated; Grade III	IA	T1	N0	M0	None/Unknown	No/Unknown	84	Dead	75	Lobectomy/Bilobectomy
White	Female	2005	Moderately differentiated; Grade II	IA	T1	N0	M0	None/Unknown	No/Unknown	36	Dead	72	Lobectomy/Bilobectomy
White	Female	2005	Poorly differentiated; Grade III	IA	T1	N0	M0	None/Unknown	No/Unknown	21	Dead	76	Lobectomy/Bilobectomy
White	Female	2005	Moderately differentiated; Grade II	IA	T1	N0	M0	None/Unknown	No/Unknown	121	Alive	69	Lobectomy/Bilobectomy
White	Male	2005	Moderately differentiated; Grade II	IA	T1	N0	M0	None/Unknown	No/Unknown	53	Dead	58	Lobectomy/Bilobectomy
Other (American Indian/AK Native, Asian/Pacific Islander)	Female	2005	Moderately differentiated; Grade II	IA	T1	N0	M0	None/Unknown	No/Unknown	5	Dead	57	Lobectomy/Bilobectomy
White	Female	2005	Moderately differentiated; Grade II	IA	T1	N0	M0	None/Unknown	No/Unknown	7	Dead	78	Lobectomy/Bilobectomy
White	Female	2005	Poorly differentiated; Grade III	IA	T1	N0	M0	None/Unknown	No/Unknown	110	Dead	65	Lobectomy/Bilobectomy
White	Male	2005	Poorly differentiated; Grade III	IA	T1	N0	M0	None/Unknown	No/Unknown	27	Dead	74	Lobectomy/Bilobectomy
Black	Male	2005	Moderately differentiated; Grade II	IA	T1	N0	M0	None/Unknown	No/Unknown	10	Dead	66	Lobectomy/Bilobectomy
White	Male	2005	Poorly differentiated; Grade III	IA	T1	N0	M0	None/Unknown	No/Unknown	124	Alive	76	Lobectomy/Bilobectomy
Black	Female	2005	Moderately differentiated; Grade II	IA	T1	N0	M0	None/Unknown	No/Unknown	131	Alive	68	Lobectomy/Bilobectomy
White	Male	2005	Well differentiated; Grade I	IA	T1	N0	M0	None/Unknown	No/Unknown	120	Dead	84	Lobectomy/Bilobectomy
White	Female	2005	Well differentiated; Grade I	IA	T1	N0	M0	None/Unknown	No/Unknown	120	Dead	59	Lobectomy/Bilobectomy
White	Female	2005	Poorly differentiated; Grade III	IA	T1	N0	M0	None/Unknown	No/Unknown	118	Alive	65	Lobectomy/Bilobectomy
White	Male	2005	Poorly differentiated; Grade III	IA	T1	N0	M0	None/Unknown	No/Unknown	84	Dead	70	Lobectomy/Bilobectomy
White	Male	2005	Moderately differentiated; Grade II	IA	T1	N0	M0	None/Unknown	No/Unknown	36	Dead	66	Lobectomy/Bilobectomy
White	Female	2005	Moderately differentiated; Grade II	IA	T1	N0	M0	None/Unknown	No/Unknown	26	Dead	75	Lobectomy/Bilobectomy
White	Female	2005	Poorly differentiated; Grade III	IA	T1	N0	M0	None/Unknown	No/Unknown	113	Alive	76	Lobectomy/Bilobectomy
White	Female	2005	Moderately differentiated; Grade II	IA	T1	N0	M0	None/Unknown	No/Unknown	41	Dead	78	Lobectomy/Bilobectomy
White	Female	2005	Poorly differentiated; Grade III	IA	T1	N0	M0	None/Unknown	No/Unknown	64	Dead	87	Lobectomy/Bilobectomy
White	Male	2005	Moderately differentiated; Grade II	IA	T1	N0	M0	None/Unknown	No/Unknown	126	Alive	53	Lobectomy/Bilobectomy
Other (American Indian/AK Native, Asian/Pacific Islander)	Female	2005	Poorly differentiated; Grade III	IA	T1	N0	M0	None/Unknown	No/Unknown	131	Alive	53	Lobectomy/Bilobectomy
Black	Male	2005	Poorly differentiated; Grade III	IA	T1	N0	M0	Beam radiation	No/Unknown	16	Dead	63	Lobectomy/Bilobectomy
Other (American Indian/AK Native, Asian/Pacific Islander)	Male	2005	Moderately differentiated; Grade II	IA	T1	N0	M0	None/Unknown	No/Unknown	27	Dead	83	Lobectomy/Bilobectomy
White	Female	2005	Poorly differentiated; Grade III	IA	T1	N0	M0	None/Unknown	No/Unknown	98	Alive	72	Lobectomy/Bilobectomy
White	Female	2005	Poorly differentiated; Grade III	IA	T1	N0	M0	None/Unknown	No/Unknown	55	Dead	73	Lobectomy/Bilobectomy
White	Male	2005	Moderately differentiated; Grade II	IA	T1	N0	M0	None/Unknown	No/Unknown	128	Alive	71	Lobectomy/Bilobectomy
White	Female	2005	Poorly differentiated; Grade III	IA	T1	N0	M0	None/Unknown	No/Unknown	0	Dead	75	Lobectomy/Bilobectomy
White	Female	2005	Moderately differentiated; Grade II	IA	T1	N0	M0	None/Unknown	No/Unknown	128	Alive	72	Lobectomy/Bilobectomy
White	Female	2005	Moderately differentiated; Grade II	IA	T1	N0	M0	None/Unknown	No/Unknown	102	Dead	52	Lobectomy/Bilobectomy
White	Female	2005	Well differentiated; Grade I	IA	T1	N0	M0	None/Unknown	No/Unknown	128	Alive	52	Lobectomy/Bilobectomy
Other (American Indian/AK Native, Asian/Pacific Islander)	Female	2005	Moderately differentiated; Grade II	IA	T1	N0	M0	None/Unknown	No/Unknown	125	Alive	49	Lobectomy/Bilobectomy
Other (American Indian/AK Native, Asian/Pacific Islander)	Female	2005	Well differentiated; Grade I	IA	T1	N0	M0	None/Unknown	No/Unknown	112	Alive	69	Lobectomy/Bilobectomy
White	Female	2005	Poorly differentiated; Grade III	IA	T1	N0	M0	None/Unknown	No/Unknown	61	Dead	63	Lobectomy/Bilobectomy
White	Female	2005	Moderately differentiated; Grade II	IA	T1	N0	M0	None/Unknown	No/Unknown	78	Alive	66	Lobectomy/Bilobectomy
White	Male	2005	Moderately differentiated; Grade II	IA	T1	N0	M0	None/Unknown	No/Unknown	123	Alive	60	Lobectomy/Bilobectomy
White	Male	2005	Moderately differentiated; Grade II	IA	T1	N0	M0	None/Unknown	No/Unknown	125	Alive	70	Lobectomy/Bilobectomy
White	Male	2005	Moderately differentiated; Grade II	IA	T1	N0	M0	None/Unknown	No/Unknown	70	Dead	53	Lobectomy/Bilobectomy
Other (American Indian/AK Native, Asian/Pacific Islander)	Male	2005	Moderately differentiated; Grade II	IA	T1	N0	M0	None/Unknown	No/Unknown	112	Alive	74	Lobectomy/Bilobectomy
White	Female	2005	Moderately differentiated; Grade II	IA	T1	N0	M0	None/Unknown	No/Unknown	62	Dead	75	Lobectomy/Bilobectomy
White	Male	2005	Moderately differentiated; Grade II	IA	T1	N0	M0	None/Unknown	No/Unknown	123	Alive	78	Lobectomy/Bilobectomy
Other (American Indian/AK Native, Asian/Pacific Islander)	Female	2005	Moderately differentiated; Grade II	IA	T1	N0	M0	None/Unknown	Yes	122	Alive	71	Lobectomy/Bilobectomy
White	Male	2005	Moderately differentiated; Grade II	IA	T1	N0	M0	None/Unknown	No/Unknown	45	Dead	81	Lobectomy/Bilobectomy
White	Female	2005	Poorly differentiated; Grade III	IA	T1	N0	M0	None/Unknown	No/Unknown	62	Dead	85	Lobectomy/Bilobectomy
White	Female	2005	Poorly differentiated; Grade III	IA	T1	N0	M0	None/Unknown	No/Unknown	108	Alive	71	Lobectomy/Bilobectomy
Black	Male	2005	Poorly differentiated; Grade III	IA	T1	N0	M0	None/Unknown	No/Unknown	120	Alive	58	Lobectomy/Bilobectomy
Other (American Indian/AK Native, Asian/Pacific Islander)	Female	2005	Moderately differentiated; Grade II	IA	T1	N0	M0	None/Unknown	No/Unknown	124	Alive	56	Lobectomy/Bilobectomy
White	Male	2005	Poorly differentiated; Grade III	IA	T1	N0	M0	None/Unknown	No/Unknown	88	Dead	70	Lobectomy/Bilobectomy
White	Male	2005	Moderately differentiated; Grade II	IA	T1	N0	M0	None/Unknown	No/Unknown	53	Dead	83	Lobectomy/Bilobectomy
White	Female	2005	Poorly differentiated; Grade III	IA	T1	N0	M0	None/Unknown	No/Unknown	120	Alive	61	Lobectomy/Bilobectomy
White	Male	2005	Well differentiated; Grade I	IA	T1	N0	M0	None/Unknown	No/Unknown	22	Dead	82	Lobectomy/Bilobectomy
White	Female	2005	Well differentiated; Grade I	IA	T1	N0	M0	None/Unknown	No/Unknown	10	Dead	50	Lobectomy/Bilobectomy
White	Male	2005	Well differentiated; Grade I	IA	T1	N0	M0	None/Unknown	No/Unknown	63	Dead	84	Lobectomy/Bilobectomy
White	Male	2005	Poorly differentiated; Grade III	IA	T1	N0	M0	None/Unknown	No/Unknown	130	Alive	62	Lobectomy/Bilobectomy
White	Female	2005	Poorly differentiated; Grade III	IA	T1	N0	M0	None/Unknown	No/Unknown	1	Dead	57	Lobectomy/Bilobectomy
White	Female	2005	Poorly differentiated; Grade III	IA	T1	N0	M0	None/Unknown	No/Unknown	42	Dead	68	Lobectomy/Bilobectomy
White	Female	2005	Poorly differentiated; Grade III	IA	T1	N0	M0	None/Unknown	No/Unknown	121	Alive	64	Lobectomy/Bilobectomy
White	Female	2005	Moderately differentiated; Grade II	IA	T1	N0	M0	None/Unknown	No/Unknown	130	Alive	77	Lobectomy/Bilobectomy
White	Female	2005	Well differentiated; Grade I	IA	T1	N0	M0	None/Unknown	No/Unknown	130	Alive	66	Lobectomy/Bilobectomy
White	Female	2005	Well differentiated; Grade I	IA	T1	N0	M0	None/Unknown	No/Unknown	121	Dead	68	Lobectomy/Bilobectomy
White	Female	2005	Poorly differentiated; Grade III	IA	T1	N0	M0	None/Unknown	No/Unknown	93	Dead	62	Lobectomy/Bilobectomy
White	Male	2005	Well differentiated; Grade I	IA	T1	N0	M0	None/Unknown	No/Unknown	4	Dead	77	Lobectomy/Bilobectomy
White	Female	2005	Well differentiated; Grade I	IA	T1	N0	M0	None/Unknown	Yes	7	Dead	68	Lobectomy/Bilobectomy
White	Female	2005	Moderately differentiated; Grade II	IA	T1	N0	M0	None/Unknown	Yes	66	Dead	62	Lobectomy/Bilobectomy
White	Male	2005	Moderately differentiated; Grade II	IA	T1	N0	M0	None/Unknown	No/Unknown	26	Dead	53	Lobectomy/Bilobectomy
Other (American Indian/AK Native, Asian/Pacific Islander)	Male	2005	Moderately differentiated; Grade II	IA	T1	N0	M0	None/Unknown	No/Unknown	49	Dead	89	Lobectomy/Bilobectomy
White	Female	2005	Moderately differentiated; Grade II	IA	T1	N0	M0	None/Unknown	No/Unknown	103	Dead	78	Lobectomy/Bilobectomy
White	Female	2005	Moderately differentiated; Grade II	IA	T1	N0	M0	None/Unknown	No/Unknown	129	Alive	62	Lobectomy/Bilobectomy
White	Female	2005	Moderately differentiated; Grade II	IA	T1	N0	M0	None/Unknown	No/Unknown	15	Dead	71	Lobectomy/Bilobectomy
White	Male	2005	Poorly differentiated; Grade III	IA	T1	N0	M0	None/Unknown	No/Unknown	18	Dead	57	Lobectomy/Bilobectomy
Black	Female	2005	Well differentiated; Grade I	IA	T1	N0	M0	None/Unknown	No/Unknown	121	Dead	79	Lobectomy/Bilobectomy
White	Male	2005	Poorly differentiated; Grade III	IA	T1	N0	M0	Beam radiation	No/Unknown	25	Dead	73	Lobectomy/Bilobectomy
White	Female	2005	Moderately differentiated; Grade II	IA	T1	N0	M0	None/Unknown	No/Unknown	46	Dead	57	Lobectomy/Bilobectomy
White	Male	2005	Well differentiated; Grade I	IA	T1	N0	M0	None/Unknown	No/Unknown	24	Dead	74	Lobectomy/Bilobectomy
White	Female	2005	Moderately differentiated; Grade II	IA	T1	N0	M0	None/Unknown	No/Unknown	117	Dead	63	Lobectomy/Bilobectomy
White	Male	2005	Well differentiated; Grade I	IA	T1	N0	M0	None/Unknown	No/Unknown	85	Dead	80	Lobectomy/Bilobectomy
White	Female	2005	Moderately differentiated; Grade II	IA	T1	N0	M0	None/Unknown	Yes	124	Alive	54	Lobectomy/Bilobectomy
White	Female	2005	Poorly differentiated; Grade III	IA	T1	N0	M0	None/Unknown	No/Unknown	37	Dead	69	Lobectomy/Bilobectomy
White	Female	2005	Moderately differentiated; Grade II	IA	T1	N0	M0	None/Unknown	No/Unknown	115	Dead	60	Lobectomy/Bilobectomy
White	Female	2005	Moderately differentiated; Grade II	IA	T1	N0	M0	None/Unknown	No/Unknown	79	Dead	68	Lobectomy/Bilobectomy
White	Male	2005	Moderately differentiated; Grade II	IA	T1	N0	M0	None/Unknown	No/Unknown	68	Dead	65	Lobectomy/Bilobectomy
White	Male	2005	Moderately differentiated; Grade II	IA	T1	N0	M0	None/Unknown	No/Unknown	88	Dead	58	Lobectomy/Bilobectomy
White	Female	2005	Well differentiated; Grade I	IA	T1	N0	M0	None/Unknown	No/Unknown	131	Alive	75	Lobectomy/Bilobectomy
White	Female	2005	Moderately differentiated; Grade II	IA	T1	N0	M0	None/Unknown	No/Unknown	131	Alive	76	Lobectomy/Bilobectomy
White	Female	2005	Poorly differentiated; Grade III	IA	T1	N0	M0	None/Unknown	No/Unknown	130	Alive	71	Lobectomy/Bilobectomy
White	Male	2005	Moderately differentiated; Grade II	IA	T1	N0	M0	None/Unknown	No/Unknown	131	Alive	38	Lobectomy/Bilobectomy
White	Male	2005	Moderately differentiated; Grade II	IA	T1	N0	M0	None/Unknown	No/Unknown	6	Dead	72	Lobectomy/Bilobectomy
White	Female	2005	Moderately differentiated; Grade II	IA	T1	N0	M0	None/Unknown	No/Unknown	79	Dead	83	Lobectomy/Bilobectomy
White	Female	2005	Well differentiated; Grade I	IA	T1	N0	M0	None/Unknown	No/Unknown	129	Alive	61	Lobectomy/Bilobectomy
White	Female	2005	Poorly differentiated; Grade III	IA	T1	N0	M0	None/Unknown	No/Unknown	101	Dead	79	Lobectomy/Bilobectomy
White	Female	2005	Moderately differentiated; Grade II	IA	T1	N0	M0	None/Unknown	Yes	128	Alive	44	Lobectomy/Bilobectomy
White	Male	2005	Moderately differentiated; Grade II	IA	T1	N0	M0	None/Unknown	No/Unknown	45	Dead	60	Lobectomy/Bilobectomy
White	Male	2005	Moderately differentiated; Grade II	IA	T1	N0	M0	None/Unknown	No/Unknown	31	Dead	78	Lobectomy/Bilobectomy
White	Male	2005	Unknown	IA	T1	N0	M0	None/Unknown	No/Unknown	131	Alive	71	Lobectomy/Bilobectomy
White	Female	2005	Poorly differentiated; Grade III	IA	T1	N0	M0	None/Unknown	No/Unknown	43	Dead	66	Lobectomy/Bilobectomy
White	Female	2005	Moderately differentiated; Grade II	IA	T1	N0	M0	None/Unknown	No/Unknown	46	Dead	79	Lobectomy/Bilobectomy
White	Female	2005	Moderately differentiated; Grade II	IA	T1	N0	M0	None/Unknown	Yes	58	Dead	57	Lobectomy/Bilobectomy
Other (American Indian/AK Native, Asian/Pacific Islander)	Male	2005	Well differentiated; Grade I	IA	T1	N0	M0	None/Unknown	No/Unknown	121	Alive	66	Lobectomy/Bilobectomy
White	Female	2005	Moderately differentiated; Grade II	IA	T1	N0	M0	None/Unknown	No/Unknown	73	Dead	78	Lobectomy/Bilobectomy
Black	Male	2005	Moderately differentiated; Grade II	IA	T1	N0	M0	None/Unknown	No/Unknown	70	Dead	52	Lobectomy/Bilobectomy
White	Female	2005	Poorly differentiated; Grade III	IA	T1	N0	M0	None/Unknown	No/Unknown	128	Alive	61	Lobectomy/Bilobectomy
Black	Female	2005	Well differentiated; Grade I	IA	T1	N0	M0	None/Unknown	No/Unknown	127	Alive	52	Lobectomy/Bilobectomy
White	Female	2005	Poorly differentiated; Grade III	IA	T1	N0	M0	None/Unknown	No/Unknown	80	Dead	72	Lobectomy/Bilobectomy
White	Male	2005	Unknown	IA	T1	N0	M0	None/Unknown	No/Unknown	63	Dead	78	Lobectomy/Bilobectomy
White	Male	2005	Poorly differentiated; Grade III	IA	T1	N0	M0	None/Unknown	No/Unknown	59	Dead	78	Lobectomy/Bilobectomy
White	Female	2005	Poorly differentiated; Grade III	IA	T1	N0	M0	None/Unknown	No/Unknown	39	Dead	46	Lobectomy/Bilobectomy
White	Female	2005	Poorly differentiated; Grade III	IA	T1	N0	M0	None/Unknown	No/Unknown	44	Dead	57	Lobectomy/Bilobectomy
White	Female	2005	Moderately differentiated; Grade II	IA	T1	N0	M0	None/Unknown	No/Unknown	128	Alive	63	Lobectomy/Bilobectomy
White	Female	2005	Moderately differentiated; Grade II	IA	T1	N0	M0	None/Unknown	No/Unknown	127	Alive	78	Lobectomy/Bilobectomy
White	Female	2005	Poorly differentiated; Grade III	IA	T1	N0	M0	None/Unknown	No/Unknown	122	Alive	69	Lobectomy/Bilobectomy
White	Female	2005	Poorly differentiated; Grade III	IA	T1	N0	M0	None/Unknown	No/Unknown	51	Dead	57	Lobectomy/Bilobectomy
White	Female	2005	Moderately differentiated; Grade II	IA	T1	N0	M0	None/Unknown	No/Unknown	36	Dead	52	Lobectomy/Bilobectomy
White	Female	2005	Moderately differentiated; Grade II	IA	T1	N0	M0	None/Unknown	No/Unknown	106	Dead	71	Lobectomy/Bilobectomy
White	Male	2005	Moderately differentiated; Grade II	IA	T1	N0	M0	None/Unknown	No/Unknown	110	Dead	65	Lobectomy/Bilobectomy
White	Female	2005	Poorly differentiated; Grade III	IA	T1	N0	M0	None/Unknown	No/Unknown	24	Dead	73	Lobectomy/Bilobectomy
White	Female	2005	Moderately differentiated; Grade II	IA	T1	N0	M0	None/Unknown	No/Unknown	126	Alive	62	Lobectomy/Bilobectomy
White	Female	2005	Moderately differentiated; Grade II	IA	T1	N0	M0	None/Unknown	No/Unknown	123	Alive	71	Lobectomy/Bilobectomy
White	Male	2005	Moderately differentiated; Grade II	IA	T1	N0	M0	None/Unknown	Yes	131	Alive	71	Lobectomy/Bilobectomy
White	Female	2005	Poorly differentiated; Grade III	IA	T1	N0	M0	None/Unknown	No/Unknown	127	Alive	76	Lobectomy/Bilobectomy
White	Male	2005	Poorly differentiated; Grade III	IA	T1	N0	M0	None/Unknown	No/Unknown	64	Dead	60	Lobectomy/Bilobectomy
White	Female	2005	Moderately differentiated; Grade II	IA	T1	N0	M0	None/Unknown	No/Unknown	76	Dead	65	Lobectomy/Bilobectomy
White	Female	2005	Poorly differentiated; Grade III	IA	T1	N0	M0	None/Unknown	No/Unknown	41	Dead	64	Lobectomy/Bilobectomy
White	Female	2005	Poorly differentiated; Grade III	IA	T1	N0	M0	None/Unknown	No/Unknown	126	Alive	52	Lobectomy/Bilobectomy
White	Female	2005	Moderately differentiated; Grade II	IA	T1	N0	M0	None/Unknown	Yes	50	Dead	73	Lobectomy/Bilobectomy
Black	Female	2005	Well differentiated; Grade I	IA	T1	N0	M0	None/Unknown	No/Unknown	128	Alive	60	Lobectomy/Bilobectomy
White	Male	2005	Moderately differentiated; Grade II	IA	T1	N0	M0	None/Unknown	No/Unknown	130	Alive	74	Lobectomy/Bilobectomy
Other (American Indian/AK Native, Asian/Pacific Islander)	Female	2005	Poorly differentiated; Grade III	IA	T1	N0	M0	None/Unknown	No/Unknown	66	Dead	62	Lobectomy/Bilobectomy
White	Female	2005	Moderately differentiated; Grade II	IA	T1	N0	M0	None/Unknown	No/Unknown	129	Alive	78	Lobectomy/Bilobectomy
White	Male	2005	Moderately differentiated; Grade II	IA	T1	N0	M0	None/Unknown	No/Unknown	130	Alive	72	Lobectomy/Bilobectomy
Other (American Indian/AK Native, Asian/Pacific Islander)	Female	2005	Moderately differentiated; Grade II	IA	T1	N0	M0	None/Unknown	No/Unknown	131	Alive	71	Lobectomy/Bilobectomy
White	Male	2005	Poorly differentiated; Grade III	IA	T1	N0	M0	None/Unknown	No/Unknown	50	Dead	76	Lobectomy/Bilobectomy
White	Male	2005	Moderately differentiated; Grade II	IA	T1	N0	M0	None/Unknown	No/Unknown	104	Dead	70	Lobectomy/Bilobectomy
White	Male	2005	Moderately differentiated; Grade II	IA	T1	N0	M0	None/Unknown	No/Unknown	89	Dead	58	Lobectomy/Bilobectomy
White	Male	2005	Moderately differentiated; Grade II	IA	T1	N0	M0	None/Unknown	No/Unknown	129	Alive	74	Lobectomy/Bilobectomy
White	Female	2005	Moderately differentiated; Grade II	IA	T1	N0	M0	None/Unknown	Yes	60	Dead	60	Lobectomy/Bilobectomy
White	Female	2005	Moderately differentiated; Grade II	IA	T1	N0	M0	Beam radiation	Yes	50	Dead	69	Lobectomy/Bilobectomy
White	Male	2005	Poorly differentiated; Grade III	IA	T1	N0	M0	None/Unknown	No/Unknown	128	Alive	60	Lobectomy/Bilobectomy
White	Female	2005	Moderately differentiated; Grade II	IA	T1	N0	M0	None/Unknown	No/Unknown	102	Dead	52	Lobectomy/Bilobectomy
White	Female	2005	Poorly differentiated; Grade III	IA	T1	N0	M0	None/Unknown	No/Unknown	26	Dead	81	Lobectomy/Bilobectomy
White	Female	2005	Well differentiated; Grade I	IA	T1	N0	M0	None/Unknown	No/Unknown	131	Alive	72	Lobectomy/Bilobectomy
White	Female	2005	Well differentiated; Grade I	IA	T1	N0	M0	None/Unknown	No/Unknown	131	Alive	50	Lobectomy/Bilobectomy
White	Male	2005	Poorly differentiated; Grade III	IA	T1	N0	M0	None/Unknown	No/Unknown	61	Dead	72	Lobectomy/Bilobectomy
White	Female	2005	Poorly differentiated; Grade III	IA	T1	N0	M0	None/Unknown	No/Unknown	11	Dead	70	Lobectomy/Bilobectomy
White	Female	2005	Unknown	IA	T1	N0	M0	None/Unknown	No/Unknown	70	Dead	74	Lobectomy/Bilobectomy
Other (American Indian/AK Native, Asian/Pacific Islander)	Female	2005	Poorly differentiated; Grade III	IA	T1	N0	M0	None/Unknown	No/Unknown	117	Alive	70	Lobectomy/Bilobectomy
Other (American Indian/AK Native, Asian/Pacific Islander)	Male	2005	Moderately differentiated; Grade II	IA	T1	N0	M0	None/Unknown	No/Unknown	127	Dead	73	Lobectomy/Bilobectomy
White	Female	2005	Poorly differentiated; Grade III	IA	T1	N0	M0	None/Unknown	No/Unknown	122	Alive	74	Lobectomy/Bilobectomy
[truncated: 158,639 more rows]
